# Supplementary material for: Copper-mediated pentafluoroethylation of organoboronates and terminal alkynes with TMSCF3
Source: Royal Society of Chemistry journal article supplement (doi:10.1039/d2cc00975g), 2022-01-01

*Electronic Supplementary Information for:*

## **Copper-mediated pentafluoroethylation of organoboronates and terminal alkynes with TMSCF<sub>3</sub>**

Shitao Pan,<sup>a,†</sup> Qiqiang Xie,<sup>a,‡</sup> Xiu Wang,<sup>a</sup> Qian Wang,<sup>a</sup> Chuanfa Ni,<sup>a</sup> and Jinbo Hu<sup>a,\*</sup>

*Key Laboratory of Organofluorine Chemistry, Center for Excellence in Molecular  
Synthesis, Shanghai Institute of Organic Chemistry, University of Chinese Academy of  
Sciences, Chinese Academy of Sciences, 345 Ling-Ling Road, Shanghai 200032 (China)*

*\*E-mail: jinbohu@sioc.ac.cn*

### **Table of Contents**

|                                                                                            |            |
|--------------------------------------------------------------------------------------------|------------|
| <b>1. General Information</b> .....                                                        | <b>S2</b>  |
| <b>2. Optimization of Reaction Conditions</b> .....                                        | <b>S3</b>  |
| <b>3. Syntheses of Boronates and Alkynes</b> .....                                         | <b>S7</b>  |
| <b>4. General Procedures for Pentafluoroethylation of Substrates</b> .....                 | <b>S17</b> |
| <b>5. Procedures for Scaled Syntheses</b> .....                                            | <b>S40</b> |
| <b>6. References</b> .....                                                                 | <b>S44</b> |
| <b>7. <sup>1</sup>H, <sup>19</sup>F, <sup>13</sup>C NMR Spectra of New Compounds</b> ..... | <b>S45</b> |

## 1. General Information

Unless otherwise mentioned, all solvents and reagents were purchased from commercial sources and used as received. *N,N*-dimethylformamide (DMF), tetrahydrofuran (THF) and toluene were dried by passing through a solvent purification system. Dry pyridine (Py), hexamethylphosphoramide (HMPA), dimethyl sulfoxide (DMSO), 1,3-dimethyl-3,4,5,6-tetra-hydro-2(1*H*)-pyrimidinone (DMPU) and 1-methyl-2-pyrrolidinone (NMP) were obtained through distillation over CaH<sub>2</sub>. CuCl was purified according to: W. L. F. Armarego, D. D. Perrin, *Purification of Laboratory Chemicals*, 5th ed.; Butterworth Heinemann: Oxford, **1997**. All the melting points were uncorrected. <sup>1</sup>H NMR spectra were recorded at 400 or 500 MHz. <sup>19</sup>F NMR spectra were recorded at 376 MHz. <sup>13</sup>C NMR spectra were recorded at 100 or 126 MHz. <sup>1</sup>H NMR chemical shifts were determined relative to internal (CH<sub>3</sub>)<sub>4</sub>Si (TMS) at  $\delta$  0.00 ppm or to the signal of the residual protonated solvent: DMSO-*d*<sub>6</sub> at  $\delta$  2.50 ppm, CDCl<sub>3</sub> at  $\delta$  7.26 ppm. <sup>19</sup>F NMR chemical shifts were determined relative to internal or external CFCl<sub>3</sub> at  $\delta$  0.00 ppm or PhCF<sub>3</sub> at  $\delta$  -63.00 ppm. <sup>13</sup>C NMR chemical shifts were determined relative to the signal of the solvent: CDCl<sub>3</sub> at  $\delta$  77.16 ppm, DMSO-*d*<sub>6</sub> at  $\delta$  39.50 ppm. Data for <sup>1</sup>H, <sup>13</sup>C, <sup>19</sup>F NMR were recorded as follows: chemical shift ( $\delta$ , ppm), multiplicity (s = singlet, d = doublet, t = triplet, m = multiplet, q = quartet, dd = doublet of doublets, dt = doublet of triplets, td = triplet of doublets, qt = quartet of triplets, tq = triplet of quartets, br = broad). High-resolution mass data were recorded on a high-resolution mass spectrometer in the EI mode, FI positive ion mode or ESI positive ion mode.

## 2. Optimization of Reaction Conditions

### 2.1 General Procedures for Optimization of Pentafluoroethylation of Boronates

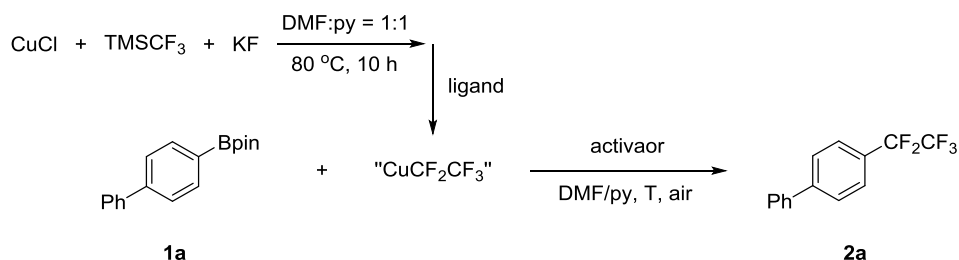

#### Typical Procedures:

**Preparation of “ $\text{CuCF}_2\text{CF}_3$ ”:** To an oven-dried sealed tube were added  $\text{CuCl}$  (2.250 mmol, 222.9 mg) and  $\text{KF}$  (1.500 mmol, 87.2 mg) in glove box. Then in fume hood,  $\text{DMF}$  (3.0 mL),  $\text{TMSCF}_3$  (1.500 mmol, 220  $\mu\text{L}$ ) and pyridine (3.0 mL) were successively added under  $\text{N}_2$  atmosphere. After stirred at room temperature for 5 minutes, the reaction mixture was immersed into  $80\text{ }^\circ\text{C}$  oil bath and stirred for 10 h. Then the reaction mixture was cooled to room temperature and filtrated in the glove box. The concentration of “ $\text{CuCF}_2\text{CF}_3$ ” in the filtrate was obtained by quantitative  $^{19}\text{F}$  NMR analysis of a 1.0 mL aliquot of this solution using  $\text{PhCF}_3$  as the internal standard. The NMR result indicated that “ $\text{CuCF}_2\text{CF}_3$ ” was in 0.08 M concentration.

**Pentafluoroethylation of boronates:** Adding the ligand into the rest of “ $\text{CuCF}_2\text{CF}_3$ ” (2.0 mL) solution without  $\text{PhCF}_3$ . Then the reaction mixture was stirred at room temperature for 1 h. Under  $\text{N}_2$  atmosphere, to a Schlenk flask was added **1a** (0.067 mmol, 18.8 mg), activator and the “ $\text{CuCF}_2\text{CF}_3$ ” solution prepared above. After that, the reaction mixture was stirred at the temperature required for 3 h in the open air. When the reaction was completed, the internal standard was added. After that, the reaction mixture was quenched with 3.0 M  $\text{HCl}$  solution or water, extracted with ether. Then, the organic layer was collected and analyzed by  $^{19}\text{F}$  NMR.

**Table S1. The influence of equivalence of KF and phen<sup>[a]</sup>**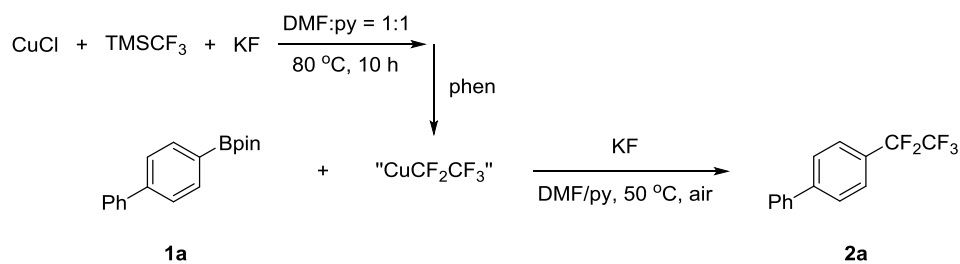

| Entry            | Equiv (phen) | Yield (%) <sup>[b]</sup> |
|------------------|--------------|--------------------------|
| 1 <sup>[c]</sup> | 11.2         | 65                       |
| 2                | 11.2         | 72                       |
| 3                | 10.0         | 70                       |
| 4                | 9.0          | 69                       |
| 5                | 8.0          | 56                       |
| 6                | 7.0          | 55                       |
| 7                | 6.0          | 57                       |
| 8                | 5.0          | 55                       |
| 9                | 4.0          | 49                       |
| 10               | 3.0          | 46                       |

[a] Reaction conditions: CuCF<sub>2</sub>CF<sub>3</sub> was prepared from TMSCF<sub>3</sub> (1.500 mmol), KF (1.500 mmol), CuCl (2.250 mmol), DMF (3.0 mL) and pyridine (3.0 mL) at 80 °C for 10 h, and used after filtration. Prepared CuCF<sub>2</sub>CF<sub>3</sub> (2.4 equiv), ligand (0.750 mmol, 11.2 equiv), rt, 1 h. Then **1a** (0.067 mmol, 1.0 equiv), 50 °C, 3 h, air. [b] The yields were determined by <sup>19</sup>F NMR spectroscopy using PhCF<sub>3</sub> as the internal standard. [c] KF (0.200 mmol, 3.0 equiv) was used.

## 2.2 General Procedures for Optimization of

### Pentafluoroethylation of Acetylenes

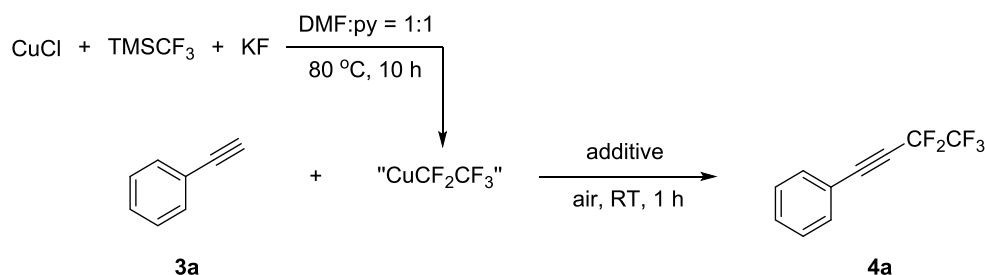

#### Typical Procedures:

To an oven-dried sealed tube were added CuCl (0.750 mmol, 74.3 mg) and KF (0.500 mmol, 29.1 mg) in glove box. Then in fume hood, DMF (1.0 mL), TMSCF<sub>3</sub> (0.500 mmol, 73  $\mu\text{L}$ ) and pyridine (1.0 mL) were successively added under N<sub>2</sub> atmosphere. After stirred at room temperature for 5 minutes, the reaction mixture was immersed into 80 °C oil bath and stirred for 10 h. Then the reaction mixture was cooled to room temperature. Then **3a** was dissolved in the DMF (0.5 mL) and added to the sealed tube containing "CuCF<sub>2</sub>CF<sub>3</sub>" solution by the injector pump over 10 min in the open air. After that, the reaction mixture was stirred at room temperature for 1 h. When the reaction was completed, the internal standard was added. After that, the reaction mixture was quenched with 3.0 M HCl solution or water, extracted with ether. Then, the organic layer was collected and analyzed by <sup>19</sup>F NMR.

**Table S2. Survey of reaction conditions of pentafluoroethylation of acetylenes<sup>[a]</sup>**

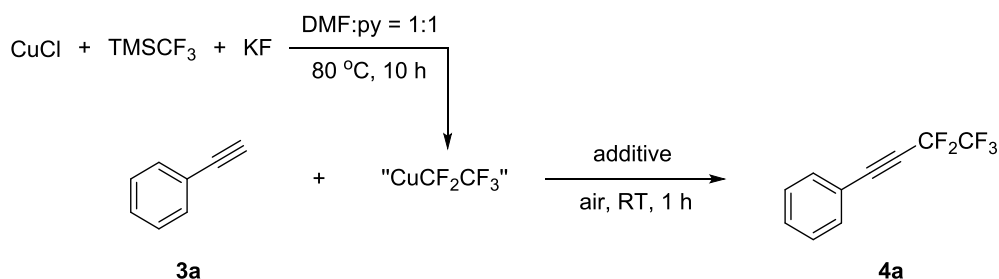

| Entry               | <b>3a</b> (mmol) | Additive (mmol)           | Yield (%) |
|---------------------|------------------|---------------------------|-----------|
| 1                   | 0.13             | -                         | 78        |
| 2 <sup>[b]</sup>    | 0.13             | -                         | 65        |
| 3                   | 0.13             | CuOAc <sub>2</sub> (0.13) | 80        |
| 4                   | 0.10             | -                         | 74        |
| 5                   | 0.15             | -                         | 78        |
| 6                   | 0.15             | TMEDA (0.75)              | 6         |
| 7 <sup>[c]</sup>    | 0.15             | -                         | 87        |
| 8 <sup>[c][d]</sup> | 0.45             | -                         | 86        |

[a] Reaction conditions: CuCl (0.75 mmol), KF (0.50 mmol), TMSCF<sub>3</sub> (0.50 mmol), DMF (1.0 mL) and pyridine (1.0 mL). **3a** was dissolved in the DMF (0.5 mL) and added by the injector pump over 10 min. The yields were determined by <sup>19</sup>F NMR spectroscopy using PhOCF<sub>3</sub> as the internal standard. [b] **3a** was added into the reaction directly. [c] The solution of CuCF<sub>2</sub>CF<sub>3</sub> stirred in air for 5 min before the **3a** was added. [d] 0.45 mmol-scale reaction was performed: **3a** (0.45 mmol, 1.0 equiv), CuCl (2.25 mmol, 5.0 equiv), TMSCF<sub>3</sub> (1.50 mmol, 3.3 equiv), KF (1.50 mmol, 3.3 equiv), air, RT, 1 h. The yield of **4a** in the scale of 0.45 mmol was determined by <sup>19</sup>F NMR spectroscopy using PhOCF<sub>3</sub> as the internal standard.

### 3. Syntheses of Boronates and Alkynes

#### 3.1 Syntheses of Arylboronates

a.

(*R*)-2-(4-chloro-3-(4-((tetrahydrofuran-3-yl)oxy)benzyl)phenyl)-4,4,5,5-tetramethyl-1,3,2-dioxaborolane (**1h**)

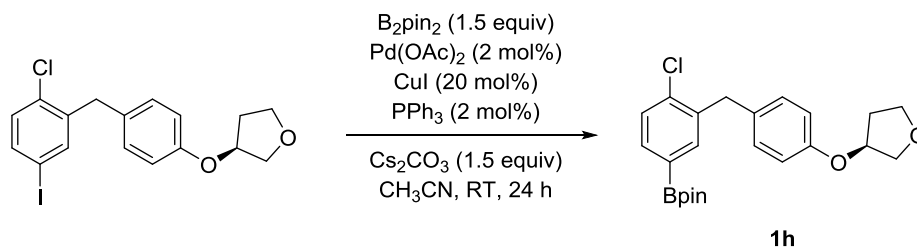

(*R*)-2-(4-chloro-3-(4-((tetrahydrofuran-3-yl)oxy)benzyl)phenyl)-4,4,5,5-tetramethyl-1,3,2-dioxaborolane was prepared according to reference<sup>[1]</sup>.

Under N<sub>2</sub> atmosphere, into an oven-dried sealed tube were added (3*S*)-3-[4-[(2-Chloro-5-iodophenyl)methyl]phenoxy]tetrahydrofuran (6.00 mmol, 1.00 equiv), Pd(OAc)<sub>2</sub> (0.12 mmol, 0.02 equiv), B<sub>2</sub>pin<sub>2</sub> (9.00 mmol, 1.5 equiv), CuI (1.20, 0.20 equiv), PPh<sub>3</sub> (0.12 mmol, 0.02 equiv), Cs<sub>2</sub>CO<sub>3</sub> (9.00 mmol, 1.5 equiv) and dry CH<sub>3</sub>CN (20 mL), then the reaction mixture was stirred at room temperature for 24 h. After the reaction was completed, the reaction mixture was added water (20 mL), and extracted with EA (3 × 20 mL). The organic layers were combined, washed with brine, dried over Na<sub>2</sub>SO<sub>4</sub> and concentrated under vacuum. The crude product was purified by fast column chromatography to afford the desired product **1h** as a white solid in 68% yield (1.70 g).

<sup>1</sup>H NMR (400 MHz, Chloroform-*d*) δ 7.69 (s, 1H), 7.60 (dd, *J* = 7.9, 1.6 Hz, 1H), 7.36 (d, *J* = 7.9 Hz, 1H), 7.10 (d, *J* = 8.6 Hz, 2H), 6.76 (d, *J* = 8.6 Hz, 2H), 4.89 – 4.86 (m, 1H), 4.05 (s, 2H), 4.02 – 3.93 (m, 3H), 3.88 (td, *J* = 8.0, 4.8 Hz, 1H), 2.22 – 2.11 (m, 2H), 1.33 (s, 12H).

All the characterization data are consistent with the previous report<sup>[2]</sup>.

b.

(*8R,9S,13S,14S*)-13-methyl-17-oxo-7,8,9,11,12,13,14,15,16,17-decahydro-6*H*-cyclopenta[*a*]phenanthren-3-yl 4-bromobenzenesulfonate (**5**)

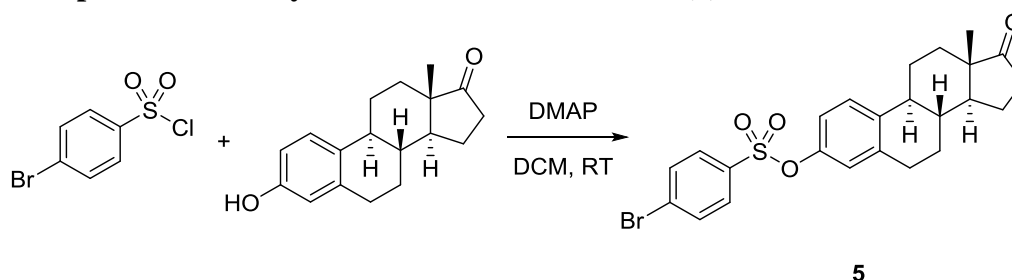

(*8R,9S,13S,14S*)-13-methyl-17-oxo-7,8,9,11,12,13,14,15,16,17-decahydro-6*H*-cyclopenta[*a*]phenanthren-3-yl 4-bromobenzenesulfonate was prepared according to the

reference<sup>[3]</sup>.

To a Schlenk tube was added 4-bromobenzenesulfonyl chloride (6.6 mmol, 1.686 g, 1.1 equiv), then the tube was evacuated/backfilled with N<sub>2</sub> for three times and estrone (6.0 mmol, 1.784 g, 1.0 equiv), DMAP (2.199 g, 3.0 equiv) and dry DCM (20 mL) were added. After that, the reaction was stirred at room temperature for 12 h. After the reaction was completed, the reaction was quenched with 3 M HCl and extracted with DCM (3 × 20 mL). The organic layer was combined, dried over anhydrous Na<sub>2</sub>SO<sub>4</sub> and concentrated under vacuum. The residue was purified by column chromatography to obtain the desired product as a white solid **5** in 89% yield (2.60 g).

White solid; Mp: 160-162 °C; <sup>1</sup>H NMR (400 MHz, CDCl<sub>3</sub>) δ 7.78 – 7.56 (m, 4H), 7.19 (d, *J* = 8.6 Hz, 1H), 6.79 (d, *J* = 2.4 Hz, 1H), 6.68 (dd, *J* = 8.6, 2.5 Hz, 1H), 2.85 (dd, *J* = 8.8, 4.1 Hz, 2H), 2.51 (dd, *J* = 18.9, 8.6 Hz, 1H), 2.41 – 1.91 (m, 6H), 1.76 – 1.35 (m, 6H), 0.91 (s, 3H).

<sup>13</sup>C NMR (100 MHz, CDCl<sub>3</sub>) δ 147.42, 139.19, 138.74, 134.84, 132.56, 130.03, 129.54, 126.74, 122.40, 119.18, 77.48, 77.16, 76.84, 50.52, 47.98, 44.20, 37.93, 35.92, 31.61, 29.42, 26.28, 25.78, 21.67, 13.93.

MS (ESI, *m/z*): 511 (M+Na<sup>+</sup>);

HRMS (ESI): Calcd for: [C<sub>14</sub>H<sub>25</sub>BrSO<sub>4</sub>Na]<sup>+</sup>, 511.0549, found: 511.0553.

IR (film): 3090, 3060, 2931, 2860, 1736, 1575, 1490, 1471, 1437, 1453, 1391, 1376, 1262, 1207, 930, 918 cm<sup>-1</sup>.

c.

**(8*R*,9*S*,13*S*,14*S*)-13-methyl-17-oxo-7,8,9,11,12,13,14,15,16,17-decahydro-6*H*-cyclopenta[*a*]phenanthren-3-yl 4-(4,4,5,5-tetramethyl-1,3,2-dioxaborolan-2-yl)benzenesulfonate (**1i**)**

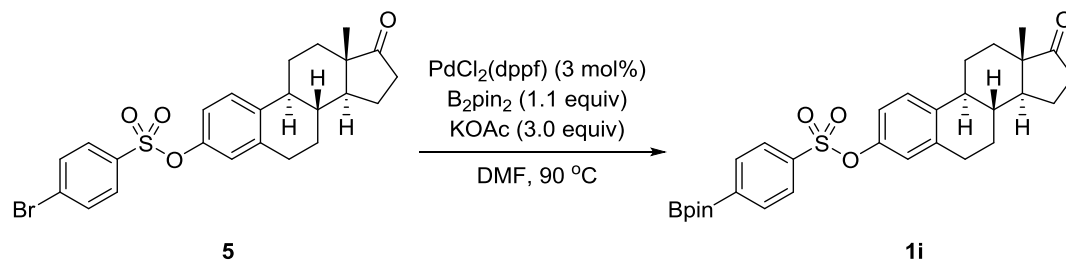

(8*R*,9*S*,13*S*,14*S*)-13-methyl-17-oxo-7,8,9,11,12,13,14,15,16,17-decahydro-6*H*-cyclopenta[*a*]phenanthren-3-yl

4-(4,4,5,5-tetramethyl-1,3,2-dioxaborolan-2-yl)benzenesulfonate was prepared according to reference<sup>[4]</sup>.

Under N<sub>2</sub> atmosphere, into an oven-dried sealed tube were added **5** (978.8 mg, 1.00 equiv), PdCl<sub>2</sub>(dppf) (43.9 mg, 0.03 equiv), B<sub>2</sub>pin<sub>2</sub> (558.7mg, 1.10 equiv), KOAc (588.8 mg, 3.00 equiv) and dry DMF (10 mL), then the reaction mixture was stirred at 90 °C for 12 h. After the reaction was completed, the reaction mixture was added water (20 mL), and extracted with DCM (3 × 20 mL). The organic layers were combined, washed with water (3 × 30 mL), dried over Na<sub>2</sub>SO<sub>4</sub> and concentrated under vacuum. The crude product was purified by fast column chromatography to afford the desired product **1i** as a white solid in 40% yield (430 mg).



White solid; Mp: 90-92 °C; <sup>1</sup>H NMR (400 MHz, CDCl<sub>3</sub>) δ 7.94 (d, *J* = 8.2 Hz, 2H), 7.84 (d, *J* = 8.2 Hz, 2H), 7.15 (d, *J* = 8.6 Hz, 1H), 6.80 (d, *J* = 2.3 Hz, 1H), 6.64 (dd, *J* = 8.6, 2.5 Hz, 1H), 2.84 (dd, *J* = 8.7, 3.8 Hz, 2H), 2.51 (dd, *J* = 18.8, 8.6 Hz, 1H), 2.42 – 1.88 (m, 6H), 1.75 – 1.40 (m, 6H), 1.37 (s, 12H), 0.91 (s, 3H).

<sup>13</sup>C NMR (100 MHz, CDCl<sub>3</sub>) δ 220.74, 147.61, 138.96, 138.60, 138.01, 135.33, 127.52, 126.63, 122.50, 119.26, 84.74, 50.54, 48.02, 44.21, 37.95, 35.95, 31.63, 29.42, 26.32, 25.79, 25.03, 24.99, 21.70, 13.95.

MS (ESI, *m/z*): 558 (M+Na<sup>+</sup>);

HRMS (ESI): Calcd for: [C<sub>30</sub>H<sub>37</sub><sup>10</sup>BSO<sub>6</sub>Na]<sup>+</sup>, 558.2332, found: 558.2337.

IR (film): 2976, 2931, 2865, 1737, 1601, 1492, 1392, 1373, 1359, 1271, 1207, 1189, 1142, 930, 918, 855 cm<sup>-1</sup>.

d. (*E*)-2-(2-([1,1'-biphenyl]-4-yl)vinyl)-4,4,5,5-tetramethyl-1,3,2-dioxaborolane (**1y**)

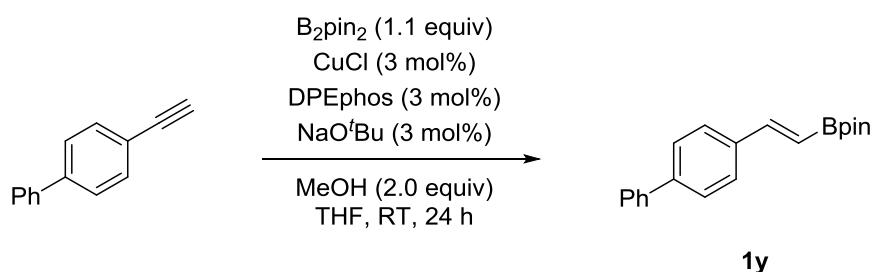

(*E*)-2-(2-([1,1'-biphenyl]-4-yl)vinyl)-4,4,5,5-tetramethyl-1,3,2-dioxaborolane was prepared according to reference<sup>[5]</sup>.

Under N<sub>2</sub> atmosphere, into an oven-dried Schlenk flask were added CuCl (24 mg, 0.03 equiv), NaO<sup>t</sup>Bu (48 mg, 0.03 equiv), DPEphos (128 mg, 0.03 equiv) and dry THF (8 mL). The reaction mixture was stirred at room temperature for 30 min. After that, B<sub>2</sub>pin<sub>2</sub> (2.23 g, 1.10 equiv) and THF (4 mL) were added. Then the mixture was stirred for another 10 min. The 4-biphenylacetylene (1.43 g, 1.00 equiv) was added, followed by MeOH (0.6 mL). The reaction mixture was stirred at room temperature for 24 h. When the reaction was completed, the mixture was filtered through a pad of Celite and concentrated. The crude product was purified by fast column chromatography to afford the desired product **1y** as a yellow solid in 55% yield (1.34 g).

<sup>1</sup>H NMR (500 MHz, CDCl<sub>3</sub>) δ 7.63 – 7.53 (m, 6H), 7.44 (t, *J* = 8.5 Hz, 3H), 7.34 (t, *J* = 7.3 Hz, 1H), 6.21 (d, *J* = 18.3 Hz, 1H), 1.33 (s, 12H).

All the characterization data are consistent with the previous report<sup>[6]</sup>.

e. (*E*)-4-(2-(4,4,5,5-tetramethyl-1,3,2-dioxaborolan-2-yl)vinyl)benzonitrile (**1aa**)

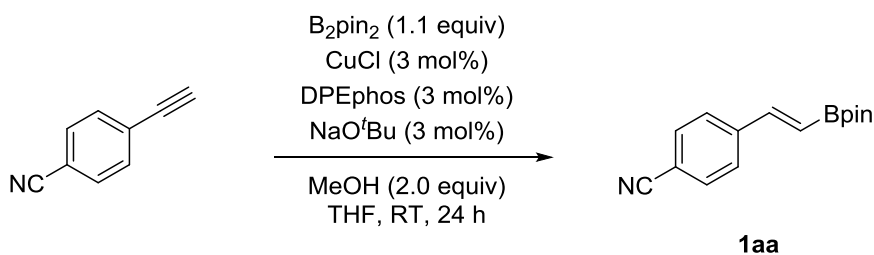

(*E*)-4-(2-(4,4,5,5-tetramethyl-1,3,2-dioxaborolan-2-yl)vinyl)benzonitrile was prepared according to reference<sup>[5]</sup>.

Under N<sub>2</sub> atmosphere, into an oven-dried Schlenk flask were added CuCl (30 mg, 0.03 equiv), NaO<sup>*t*</sup>Bu (60 mg, 0.03 equiv), DPEphos (160 mg, 0.03 equiv) and dry THF (10 mL). The reaction mixture was stirred at room temperature for 30 min. After that, B<sub>2</sub>pin<sub>2</sub> (2.79 g, 1.10 equiv) and THF (5 mL) were added. Then the mixture was stirred for another 10 min. The 4-cyanophenylacetylene (1.27 g, 1.00 equiv) was added, followed by MeOH (0.8 mL). The reaction mixture was stirred at room temperature for 24 h. When the reaction was completed, the mixture was filtered through a pad of Celite and concentrated. The crude product was purified by fast column chromatography to afford the desired product **1aa** as a white solid in 56% yield (1.42 g).

<sup>1</sup>H NMR (400 MHz, CDCl<sub>3</sub>) δ 7.63 (d, *J* = 8.3 Hz, 2H), 7.55 (d, *J* = 8.1 Hz, 2H), 7.37 (d, *J* = 18.4 Hz, 1H), 6.28 (d, *J* = 18.5 Hz, 1H), 1.32 (s, 12H).

All the characterization data are consistent with the previous report<sup>[5]</sup>.

## 3.2 Syntheses of Alkynes

### General Procedure A:

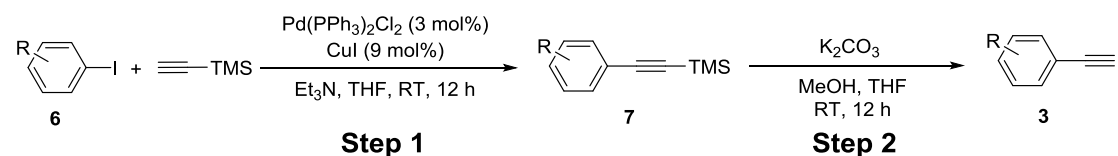

#### Step 1:

To a Schlenk tube were added CuI (172 mg, 0.9 mmol, 0.09 equiv), Pd(PPh<sub>3</sub>)<sub>2</sub>Cl<sub>2</sub> (210 mg, 0.3 mmol, 0.03 equiv) and **6** (10 mmol, 1.0 equiv), then THF (20 mL) was added under nitrogen atmosphere. After that, triethylamine (10 mL) and ethynyltrimethylsilane (1.05 g, 1.5 mL, 10.8 mmol, 1.1 equiv) were added successively. The reaction mixture was stirred at room temperature for 12 h. The resulting mixture was filtered under reduced pressure. After the solvent was removed under vacuum, the crude product was purified by column chromatography on silica gel to afford the product **7**.

#### 1-(4-((Trimethylsilyl)ethynyl)phenyl)ethan-1-one (**7b**)<sup>[7]</sup>

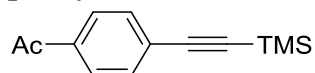

Performed on 10 mmol scale, eluted with petroleum ether/ethyl acetate = 50/1 to give **7b** (1.77g, 82%) as a pale-yellow liquid.

<sup>1</sup>H NMR (CDCl<sub>3</sub>, 400 MHz): δ 7.87 (d, *J* = 8.0 Hz, 2H), 7.52 (d, *J* = 8.0 Hz, 2H), 2.58 (s, 3H), 0.25 (s, 9H).

#### ((4-(Benzyloxy)phenyl)ethynyl)trimethylsilane (**7h**)<sup>[7]</sup>

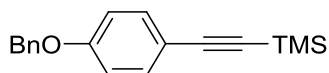

Performed on 10 mmol scale, eluted with petroleum ether to give **7h** (2.55 g, 91%) as a pale-yellow solid.

$^1\text{H NMR}$  ( $\text{CDCl}_3$ , 400MHz):  $\delta$  7.41–7.29 (m, 7H), 6.87 (d,  $J = 8.0$  Hz, 2H), 5.05 (s, 2H), 0.22 (s, 9H).

**Trimethyl(naphthalen-1-ylethyne)silane (7q)<sup>[8]</sup>**

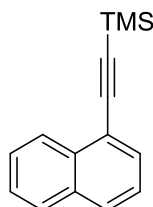

Performed on 7 mmol scale, eluted with petroleum ether to give **7q** (720 mg, 46%) as a yellow solid.

$^1\text{H NMR}$  ( $\text{CDCl}_3$ , 400 MHz):  $\delta$  8.32 (d,  $J = 8.0$  Hz, 1H), 7.82 (t,  $J = 8.0$  Hz, 2H), 7.69 (d,  $J = 8.0$  Hz, 1H), 7.57 (t,  $J = 6.8$  Hz, 1H), 7.50 (t,  $J = 6.8$  Hz, 1H), 7.39 (t,  $J = 7.6$  Hz, 1H), 0.32 (s, 9H).

**(Dibenzo[*b,d*]thiophen-4-ylethyne)trimethylsilane (7r)**

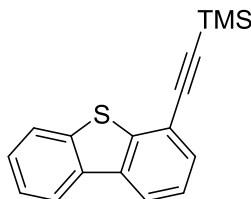

Performed on 10 mmol scale, eluted with petroleum ether to give **7r** (2.73 g, 98%) as a yellow solid.

Mp: 84–86 °C.  $^1\text{H NMR}$  ( $\text{CDCl}_3$ , 400 MHz)  $\delta$  8.24–8.07 (m, 2H), 7.93–7.84 (m, 1H), 7.58 (d,  $J = 7.2$  Hz, 1H), 7.55–7.38 (m, 3H), 0.35 (s, 9H);

$^{13}\text{C NMR}$  ( $\text{CDCl}_3$ , 100 MHz)  $\delta$  143.2, 139.7, 135.8, 135.5, 129.9, 127.1, 124.6, 124.5, 123.0, 121.9, 121.7, 118.0, 102.5, 100.4, 0.17;

**MS (EI, *m/z*, %)**: 280 ( $\text{M}^+$ , 53.5), 265 (100);

**HRMS (EI)**: Calcd. For  $\text{C}_{17}\text{H}_{16}\text{SSi}$ : 280.0736; Found: 280.0753;

**IR (film)**: 3065, 2959, 2897, 1576, 1479, 1440, 1384, 1321, 1249, 1111, 902, 844, 795, 749, 727, 637  $\text{cm}^{-1}$ .

**5-((Trimethylsilyl)ethynyl)-1H-indole (7s)<sup>[10]</sup>**

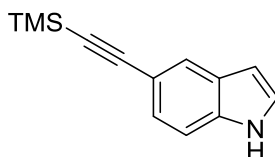

Performed on 10 mmol scale, eluted with petroleum ether/ethyl acetate = 25/1 to give **7s** (1.83 g, 86%) as a yellow oil.

$^1\text{H NMR}$  ( $\text{CDCl}_3$ , 400 MHz):  $\delta$  8.18 (s, 1H), 7.80 (s, 1H), 7.29 (s, 2H), 7.19 (t,  $J = 2.4$  Hz, 1H), 6.51–6.50 (m, 1H), 0.25 (s, 9H).

**3-((Trimethylsilyl)ethynyl)quinoline (7u)**<sup>[9]</sup>

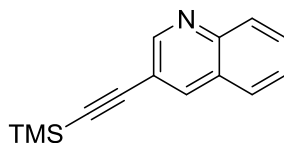

Performed on 10 mmol scale, eluted with petroleum ether/ethyl acetate = 25/1 to give **7u** (2.20 g, 98%) as a yellow liquid.

$^1\text{H NMR}$  ( $\text{CDCl}_3$ , 400 MHz):  $\delta$  8.89 (d,  $J = 2.0$  Hz, 1H), 8.22 (s, 1H), 8.05 (d,  $J = 9.2$  Hz, 1H), 7.79–7.61 (m, 2H), 7.59–7.46 (m, 1H), 0.28 (s, 9H).

**N-(3-chloro-4-((3-fluorobenzyl)oxy)phenyl)-6-((trimethylsilyl)ethynyl)quinazolin-4-amine (7aa)**

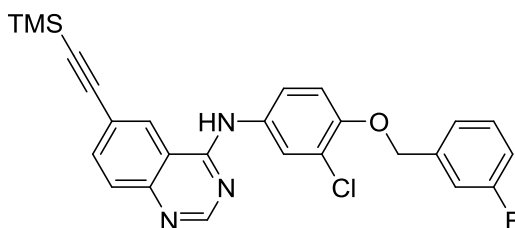

Performed on 7 mmol scale, eluted from petroleum ether/ethyl acetate = 10/1 to ethyl acetate to give **7aa** (2.85 g, 86%) as a yellow solid.

Yellow solid. Mp: 156–158 °C.  $^1\text{H NMR}$  ( $\text{CDCl}_3$ , 400 MHz)  $\delta$  8.73 (s, 1H), 7.99 (s, 1H), 7.87–7.79 (m, 3H), 7.51 (dd,  $J = 8.8, 2.4$  Hz, 1H), 7.40–7.32 (m, 2H), 7.23 (t,  $J = 7.6$  Hz, 2H), 7.06–6.96 (m, 2H), 5.17 (s, 2H), 0.29 (s, 9H);

$^{19}\text{F NMR}$  ( $\text{CDCl}_3$ , 376 MHz)  $\delta$  -113.1 (m, 1F);

$^{13}\text{C NMR}$  ( $\text{CDCl}_3$ , 100 MHz)  $\delta$  163.1 (d,  $J = 244.7$  Hz), 157.2, 155.7, 151.4, 149.6, 139.1 (d,  $J = 7.4$  Hz), 136.0, 132.0, 130.3 (d,  $J = 8.1$  Hz), 129.0, 125.0, 124.4, 123.8, 122.6 (d,  $J = 2.9$  Hz), 121.9, 121.7, 115.1 (d,  $J = 21.0$  Hz), 114.8, 114.5, 114.1 (d,  $J = 22.1$  Hz), 103.9, 96.8, 70.6, 0.01;

**MS (ESI, m/z)**: 476.1 ( $\text{M}+\text{H}^+$ );

**HRMS (ESI)**: Calcd. For  $\text{C}_{28}\text{H}_{26}\text{NO}_2\text{ClFSi}$ : 476.1369 ( $\text{M}+\text{H}^+$ ); Found: 476.1353;

**IR (film)**: 2976, 2929, 2177, 1618, 1593, 1568, 1528, 1499, 1418, 1251, 1067, 909, 843, 551  $\text{cm}^{-1}$ .

**(S)-((4-chloro-3-(4-((tetrahydrofuran-3-yl)oxy)benzyl)phenyl)ethynyl)trimethylsilylamine (7ab)**

Performed on 15 mmol scale, eluted with petroleum ether/ethyl acetate = 25/1 to give **7ab** (5.71 g, 99%) as a yellow solid.

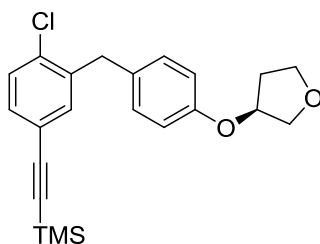

Yellow solid. Mp: 54–56 °C.  $[\alpha]_D = 9.80$  (CHCl<sub>3</sub>, c = 0.7300 w/v%). <sup>1</sup>H NMR (CDCl<sub>3</sub>, 400 MHz)  $\delta$  7.34–7.24 (m, 3H), 7.10 (d,  $J = 8.4$  Hz, 2H), 6.80 (d,  $J = 8.4$  Hz, 2H), 4.92–4.85 (m, 1H), 4.05–3.95 (m, 5H), 3.93–3.86 (m, 1H), 2.24–2.09 (m, 2H), 0.26 (s, 9H);

<sup>13</sup>C NMR (CDCl<sub>3</sub>, 100 MHz)  $\delta$  155.8, 139.0, 134.4, 134.1, 131.2, 131.0, 129.9, 129.4, 121.8, 115.3, 103.9, 95.0, 76.7, 73.0, 67.1, 38.0, 32.9, 0.17;

MS (EI,  $m/z$ , %): 384 (M<sup>+</sup>, 47.47), 299 (100.00);

HRMS (EI): Calcd. For C<sub>22</sub>H<sub>25</sub>O<sub>2</sub>ClSi: 384.1307; Found: 384.1308;

IR (film): 2957, 2864, 2153, 1611, 1577, 1508, 1472, 1434, 1389, 1242, 1176, 1116, 1083, 956, 845, 760, 678 cm<sup>-1</sup>.

## Step 2:

To a Schlenk tube was added K<sub>2</sub>CO<sub>3</sub> (3.5 equiv) and **7** (1.0 equiv), then methanol and THF were added under nitrogen atmosphere. The reaction mixture was stirred at room temperature for 12 h. The resulting mixture was filtered under reduced pressure and then extracted with ethyl acetate (30 mL  $\times$  2). The organic layer was washed with water (20 mL  $\times$  2) and brine (20 mL  $\times$  2), dried with sodium sulfate anhydrous and filtered under reduced pressure. The solvent was removed under reduced pressure to afford the product **3**.

### 1-(4-Ethynylphenyl)ethan-1-one (**3b**)<sup>[7]</sup>

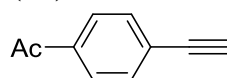

Performed on 5.9 mmol scale. 12 mL of THF and 12 mL of methanol was used as solvents. **3b** (751 mg, 88%) was obtained as a pale-yellow solid.

<sup>1</sup>H NMR (CDCl<sub>3</sub>, 400 MHz):  $\delta$  7.89 (d,  $J = 8.4$  Hz, 2H), 7.55 (d,  $J = 8.4$  Hz, 2H), 3.23 (s, 1H), 2.59 (s, 3H).

### 1-(Benzyloxy)-4-ethynylbenzene (**3h**)<sup>[7]</sup>

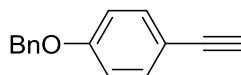

Performed on 5.0 mmol scale. 10 mL of THF and 10 mL of methanol was used as solvents. **3h** (1.0 g, 97%) was obtained as a pale-yellow solid.

<sup>1</sup>H NMR (CDCl<sub>3</sub>, 400 MHz):  $\delta$  7.44–7.30 (m, 7H), 6.90 (d,  $J = 8.8$  Hz, 2H), 5.06 (s, 2H), 2.97 (s, 1H).

### 1-Ethynynaphthalene (**3q**)<sup>[11]</sup>

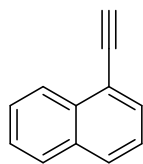

Performed on 2.5 mmol scale. 8 mL of THF and 8 mL of methanol was used as solvents. **3q** (300 mg, 79%) was obtained as a yellow liquid.

<sup>1</sup>H NMR (CDCl<sub>3</sub>, 400 MHz): δ 8.36 (d, *J* = 8.0 Hz, 1H), 7.86 (d, *J* = 8.0 Hz, 2H), 7.73 (d, *J* = 7.2 Hz, 1H), 7.58 (t, *J* = 8.0 Hz, 1H), 7.52 (t, *J* = 8.0 Hz, 1H), 7.42 (t, *J* = 8.0 Hz, 1H), 3.46 (s, 1H).

### 4-Ethynyl-dibenzo[*b,d*]thiophene (**3r**)

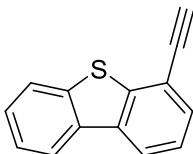

Performed on 10 mmol scale. 15 mL of THF and 15 mL of methanol was used as solvents. **3r** (1.61 g, 78%) was obtained as a white solid.

Mp: 65–67 °C. <sup>1</sup>H NMR (400 MHz, CDCl<sub>3</sub>): δ 8.19 (d, *J* = 4.0 Hz, 2H), 7.95–7.93 (m, 1H), 7.67 (d, *J* = 7.4 Hz, 1H), 7.56–7.46 (m, 3H), 3.57 (s, 1H);

<sup>13</sup>C NMR (CDCl<sub>3</sub>, 100 MHz) δ 143.0, 139.5, 135.6 (2 carbon), 130.4, 127.1, 124.6, 124.4, 123.0, 122.0, 121.9, 116.8, 82.5, 81.3;

MS (EI, *m/z*, %): 208 (M<sup>+</sup>, 100), 163 (20.86);

HRMS (EI): Calcd. For C<sub>14</sub>H<sub>8</sub>S: 208.0341; Found: 208.0345;

IR (film): 3290, 3064, 1576, 1479, 1440, 1386, 1306, 1321, 1251, 1161, 1110, 1047, 1018, 796, 749, 713, 661, 648, 594 cm<sup>-1</sup>.

### 5-Ethynyl-1*H*-indole (**3s**)<sup>[12]</sup>

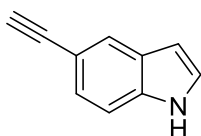

Performed on 8.6 mmol scale. 15 mL of THF and 15 mL of methanol was used as solvents. **3s** (1.07 g, 88%) was obtained as a black solid.

<sup>1</sup>H NMR (CDCl<sub>3</sub>, 400 MHz): δ 8.27 (br, 1H), 7.89 (s, 1H), 7.38 (s, 2H), 7.28–7.26 (m, 1H), 6.60–6.59 (m, 1H), 3.06 (s, 1H).

### 3-Ethynylquinoline (**3u**)<sup>[9]</sup>

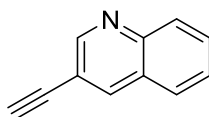

Performed on 10 mmol scale. 15 mL of THF and 15 mL of methanol was used as solvents. **3u** (1.33 g, 87%) was obtained as a yellow solid.

<sup>1</sup>H NMR (CDCl<sub>3</sub>, 400 MHz): δ 8.93 (d, *J* = 2.0 Hz, 1H), 8.27 (d, *J* = 2.0 Hz, 1H),

8.07 (d,  $J = 8.4$  Hz, 1H), 7.77–7.70 (m, 2H), 7.57–7.53 (m, 1H), 3.26 (s, 1H).

***N*-(3-chloro-4-((3-fluorobenzyl)oxy)phenyl)-6-ethynylquinazolin-4-amine (3aa)**

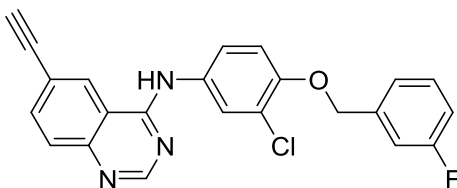

Performed on 4.84 mmol scale. 10 mL of THF and 10 mL of methanol was used as solvents. **3aa** (1.7 g, 87%) was obtained as a yellow solid.

Mp: 218–220 °C.  $^1\text{H NMR}$  (DMSO- $d_6$ , 400 MHz)  $\delta$  9.84 (s, 1H), 8.72 (s, 1H), 8.59 (s, 1H), 8.04 (d,  $J = 2.0$  Hz, 1H), 7.83 (d,  $J = 8.8$  Hz, 1H), 7.73 (t,  $J = 9.2$  Hz, 2H), 7.50–7.40 (m, 1H), 7.34–7.26 (m, 2H), 7.23 (d,  $J = 8.8$  Hz, 1H), 7.15 (t,  $J = 8.0$  Hz, 1H), 5.22 (s, 2H), 4.38 (s, 1H);

$^{19}\text{F NMR}$  (DMSO- $d_6$ , 376 MHz)  $\delta$  -113.1 (m, 1F);

$^{13}\text{C NMR}$  (DMSO- $d_6$ , 100 MHz)  $\delta$  162.2 (d,  $J = 242.6$  Hz), 157.0, 155.3, 149.8, 149.4, 139.6 (d,  $J = 7.3$  Hz), 135.3, 133.0, 130.5 (d,  $J = 8.2$  Hz), 128.3, 126.9, 123.9, 123.3 (d,  $J = 2.9$  Hz), 122.1, 121.1, 119.4, 114.9, 114.7 (d,  $J = 20.7$  Hz), 114.2, 114.0 (d,  $J = 21.8$  Hz), 83.1, 81.9, 69.4;

**MS (ESI,  $m/z$ ):** 404.0 ( $M+H^+$ );

**HRMS (ESI):** Calcd. For  $\text{C}_{23}\text{H}_{16}\text{N}_3\text{OClF}$ : 404.0960 ( $M+H^+$ ); Found: 404.0963;

**IR (film):** 3284, 2995, 1770, 1759, 1592, 1550, 1527, 1499, 1419, 1374, 1357, 1247, 1145, 1061, 942, 890, 843, 797, 776, 661, 542  $\text{cm}^{-1}$ .

***S*-(3-(4-(2-chloro-5-ethynylbenzyl)phenoxy)tetrahydrofuran (3ab)**

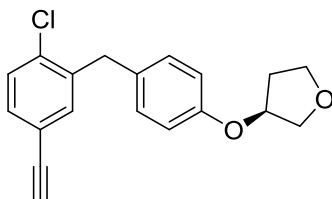

Performed on 15 mmol scale. 30 mL of THF and 30 mL of methanol was used as solvents. **3ab** (4.01g, 85%) was obtained as a brown oil.

$[\alpha]_D = 8.13$  ( $\text{CHCl}_3$ ,  $c = 0.5050$  w/v%).  $^1\text{H NMR}$  ( $\text{CDCl}_3$ , 400 MHz)  $\delta$  7.35–7.24 (m, 3H), 7.09 (d,  $J = 8.8$  Hz, 2H), 6.80 (d,  $J = 8.4$  Hz, 2H), 4.93–4.86 (m, 1H), 4.04–3.94 (m, 5H), 3.93–3.85 (m, 1H), 3.07 (s, 1H), 2.24–2.10 (m, 2H);

$^{13}\text{C NMR}$  ( $\text{CDCl}_3$ , 100 MHz)  $\delta$  156.0, 139.3, 134.8, 134.3, 131.1, 131.0, 130.0, 129.6, 120.8, 115.4, 82.7, 78.2, 77.2, 73.1, 67.1, 38.1, 33.0;

**MS (EI,  $m/z$ , %):** 312 ( $M^+$ , 65.73), 207 (100.00);

**HRMS (EI):** Calcd. For  $\text{C}_{19}\text{H}_{17}\text{O}_2\text{Cl}$ : 312.0912; Found: 312.0920;

**IR (film):** 3290, 2952, 2866, 1610, 1577, 1508, 1471, 1438, 1241, 1177, 1116, 1081, 1043, 905, 822  $\text{cm}^{-1}$ .

**General procedure B:**

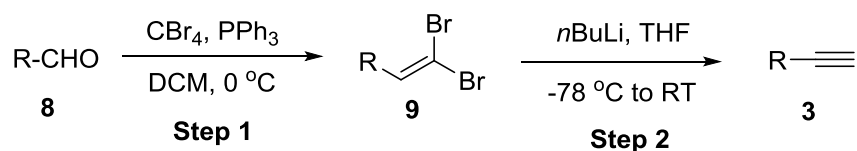

### Step 1:

To a solution of  $\text{CBr}_4$  (6.64 g, 20 mmol, 2.0 equiv) in dichloromethane (40 mL) was added  $\text{PPh}_3$  (10.5 g, 40 mmol, 4.0 equiv) in dichloromethane (30 mL) under nitrogen atmosphere at  $0^\circ\text{C}$ . A solution of **8** (10 mmol, 1.0 equiv) in dichloromethane (10 mL) was added under nitrogen atmosphere. The reaction mixture was stirred for 2 h at  $0^\circ\text{C}$ . The resulting mixture was extracted with diethyl ether (30 mL  $\times$  2). The organic layer was washed with water (20 mL  $\times$  2) and brine (20 mL  $\times$  2), dried with sodium sulfate anhydrous and concentrated under reduced pressure. The crude product was purified by column chromatography on silica gel to afford the product **9**.

### 2-(2,2-Dibromovinyl)benzofuran (**9a**)<sup>[13]</sup>

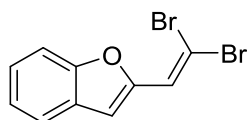

Performed on 10 mmol scale, eluted with petroleum ether to give **9a** (2.72 g, 91%) as a yellow solid.

$^1\text{H NMR}$  ( $\text{CDCl}_3$ , 400 MHz):  $\delta$  7.59 (d,  $J = 7.8$  Hz, 1H), 7.52 (s, 1H), 7.47–7.42 (m, 1H), 7.32 (m, 1H), 7.29 (s, 1H), 7.24–7.19 (m, 1H).

### (E)-(4,4-Dibromobuta-1,3-dien-1-yl)benzene (**9b**)<sup>[13]</sup>

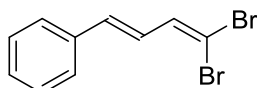

Performed on 10 mmol scale, eluted with petroleum ether to give **9b** (1.5 g, 52%) as a white solid.

$^1\text{H NMR}$  ( $\text{CDCl}_3$ , 400 MHz):  $\delta$  7.45 (dd,  $J = 8.4, 1.6$  Hz, 2H), 7.38–7.27 (m, 3H), 7.10 (d,  $J = 9.6$  Hz, 1H), 6.85–6.67 (m, 2H).

### Step 2:

To a Schlenk tube was added **9** (1.0 equiv), then THF (30 mL) was added under nitrogen atmosphere.  $n\text{-BuLi}$  (2.5 M in hexane, 2.5 equiv) was added dropwise at  $-78^\circ\text{C}$  in 15 min. The reaction solution was stirred at  $-78^\circ\text{C}$  for 30 min. After the resulting mixture was slowly warmed to room temperature, it was quenched with aqueous sat.  $\text{NH}_4\text{Cl}$  and extracted with diethyl ether (50 mL  $\times$  2). The organic layer was washed with water (20 mL  $\times$  2) and brine (20 mL  $\times$  2), dried with sodium sulfate anhydrous and concentrated under reduced pressure. The crude product was purified by column chromatography on silica gel to afford the product **3**.



## 2-Ethynylbenzofuran (**3t**)<sup>[13]</sup>

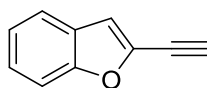

Performed on 8.94 mmol scale, eluted with petroleum ether to give **3t** (680 mg, 54%) as a brown liquid.

<sup>1</sup>H NMR (CDCl<sub>3</sub>, 400 MHz): δ 7.55 (d, *J* = 7.8 Hz, 1H), 7.45 (d, *J* = 8.4 Hz, 1H), 7.34 (t, *J* = 7.8 Hz, 1H), 7.26–7.22 (m, 1H), 7.00 (s, 1H), 3.49 (d, *J* = 1.6 Hz, 1H).

## (*E*)-but-1-en-3-yn-1-ylbenzene (**3v**)<sup>[13]</sup>

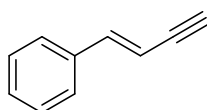

Performed on 5.2 mmol scale, eluted with petroleum ether to give **3v** (226 mg, 34%) as a brown liquid.

<sup>1</sup>H NMR (CDCl<sub>3</sub>, 400 MHz): δ 7.39–7.26 (m, 5H), 7.03 (d, *J* = 16.4 Hz, 1H), 6.12 (dd, *J* = 16.4, 2.4 Hz, 1H), 3.04 (d, *J* = 2.4 Hz, 1H).

## 4. General Procedures for Pentafluoroethylation of Substrates

### 4.1 General Procedures for Pentafluoroethylation of Boronates

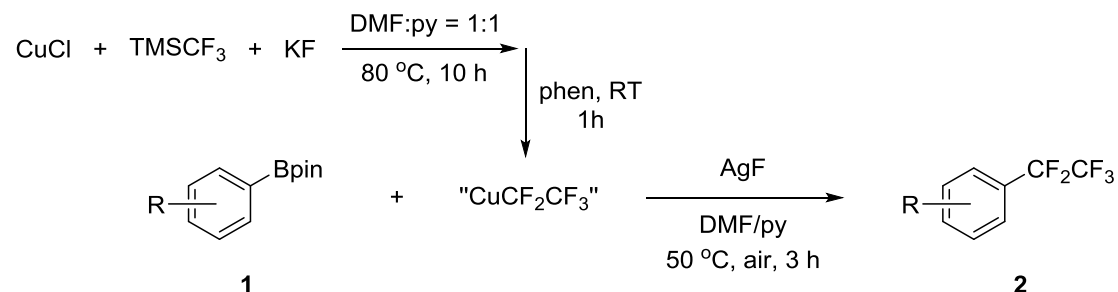

### Typical Procedures:

To an oven-dried sealed tube were added CuCl (4.50 mmol, 445.8 mg, 11.2 equiv) and KF (3.0 mmol, 174.4 mg, 7.5 equiv) in glove box. Then in fume hood, DMF (6 mL), TMSCF<sub>3</sub> (3.0 mmol, 440 μL, 7.5 equiv) and pyridine (6 mL) were successively added under N<sub>2</sub> atmosphere. After stirred at room temperature for 5 minutes, the reaction mixture was immersed into 80 °C oil bath and stirred for 10 h. Then the reaction mixture was cooled to room temperature and filtrated in the glove box. The filtrate was added in to the sealed tube containing phen (1.60 mmol, 288.3 mg, 4.0 equiv). Then the reaction mixture was stirred at room temperature for 1 h. Under N<sub>2</sub> atmosphere, to a Schlenk flask was added arylboronate (0.40 mmol, 1.0 equiv), AgF (1.60 mmol, 203.0 mg, 4.0 equiv) and the "CuCF<sub>2</sub>CF<sub>3</sub>" solution prepared above. After that, the reaction mixture was stirred 50 °C for 3 h in the open air. When the reaction

was completed, the reaction mixture was quenched with 50 mL 3.0 M HCl solution or 20 mL ammonium hydroxide, extracted with CH<sub>2</sub>Cl<sub>2</sub> (30 mL × 3). The combined organic layer was washed with H<sub>2</sub>O (30 mL × 3) and brine (40 mL), dried over Na<sub>2</sub>SO<sub>4</sub>, concentrated under vacuum. The residue was purified by column chromatography on silica gel to afford **2**. <sup>19</sup>F NMR data (using PhCF<sub>3</sub> as the internal standard) were provided for the volatile products.

#### 4-(perfluoroethyl)-1,1'-biphenyl (**2a**):

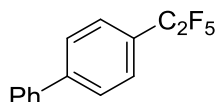

White solid (71 mg, 65%); <sup>1</sup>H NMR (CDCl<sub>3</sub>, 400 MHz) δ 7.68 (q, *J* = 8.6 Hz, 4H), 7.62 – 7.56 (m, 2H), 7.51 – 7.44 (m, 2H), 7.44 – 7.37 (m, 1H); <sup>19</sup>F NMR (CDCl<sub>3</sub>, 376 MHz) δ -85.19 (s, 3F), -115.15 (s, 2F); <sup>13</sup>C NMR (CDCl<sub>3</sub>, 126 MHz) δ 145.00 (d, *J* = 1.7 Hz), 139.82, 129.14, 128.39, 127.56, 127.44, 127.06 (t, *J* = 6.2 Hz), 119.31 (qt, *J* = 286.0, 39.6 Hz), 113.68 (tq, *J* = 253.7, 38.2 Hz).

All the characterization data are consistent with the previous report<sup>[3]</sup>.

#### 2-(4-(perfluoroethyl)phenyl)naphthalene (**2b**):

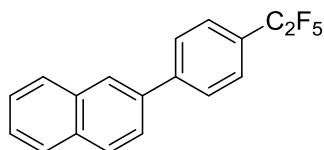

White solid (54 mg, 56%). Mp: 114-116 °C; <sup>1</sup>H NMR (CDCl<sub>3</sub>, 400 MHz,) δ 8.05 (d, *J* = 1.2 Hz, 1H), 7.96-7.85 (m, 3H), 7.82 (d, *J* = 8.6 Hz, 2H), 7.73 (d, *J* = 1.8 Hz, 1H), 7.70 (d, *J* = 8.5 Hz, 2H), 7.56-7.46 (m, 2H);

<sup>19</sup>F NMR (CDCl<sub>3</sub>, 376 MHz,) δ -85.18 (s, 3F), -115.17 (s, 2F);

<sup>13</sup>C NMR (CDCl<sub>3</sub>, 100 MHz) δ 144.94, 137.10, 133.70, 133.15, 128.93, 128.47, 127.85, 127.81, 127.64 (t, *J* = 23.9 Hz), 127.13 (t, *J* = 6.2 Hz), 126.75, 126.66, 126.55, 125.31, 119.34 (qt, *J* = 286.2, 39.5 Hz), 113.72 (tq, *J* = 252.0, 38.1 Hz);

MS (EI, *m/z*): 322 (M<sup>+</sup>);

HRMS (EI): Calcd for: C<sub>18</sub>H<sub>11</sub>F<sub>5</sub><sup>+</sup>, 322.0781, found: 322.0788.

IR (film): 3069, 1438, 1410, 1341, 1275, 1202, 1144, 1112, 1094, 975, 833, 815, 754, 707 cm<sup>-1</sup>.

#### 2-fluoro-4-(perfluoroethyl)-1,1'-biphenyl (**2c**):

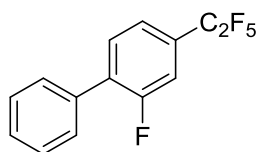

Colorless liquid (98 mg, 84%); <sup>1</sup>H NMR (CDCl<sub>3</sub>, 400 MHz) δ 7.54 (ddd, *J* = 4.6, 3.9, 2.4 Hz, 3H), 7.48-7.36 (m, 5H);

<sup>19</sup>F NMR (CDCl<sub>3</sub>, 376 MHz) δ -85.11 (s, 3F), -115.09 (s, 2F), -116.04 (t, *J* = 8.9 Hz,

1F);

$^{13}\text{C}$  NMR ( $\text{CDCl}_3$ , 100 MHz)  $\delta$  159.59 (d,  $J = 250.3$  Hz), 134.46, 133.13 (d,  $J = 13.6$  Hz), 131.50 (d,  $J = 3.8$  Hz), 129.56 (td,  $J = 24.8, 8.0$  Hz), 129.17 (d,  $J = 2.9$  Hz), 128.83, 128.74, 122.60 (dd,  $J = 10.4, 5.8$  Hz), 119.16 (qt,  $J = 284.2, 39.1$  Hz), 114.99 (dt,  $J = 26.7, 6.5$  Hz), 112.93 (tqd,  $J = 252.8, 38.4, 1.7$  Hz).

MS (FI,  $m/z$ ): 290 ( $\text{M}^+$ );

HRMS (FI): Calcd for:  $\text{C}_{14}\text{H}_8\text{F}_6^+$ , 290.0525, found: 290.0531.

IR (film): 3077, 3043, 2917, 2852, 1585, 1519, 1485, 1418, 1337, 1303, 1209, 1194, 1127, 1093, 1009, 869, 767, 747  $\text{cm}^{-1}$ .

#### 1-(methylsulfonyl)-4-(perfluoroethyl)benzene (2d):

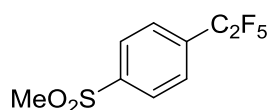

Light yellow solid (84 mg, 77%). Mp: 100-102  $^{\circ}\text{C}$ ;  $^1\text{H}$  NMR ( $\text{CDCl}_3$ , 400 MHz)  $\delta$  8.13 (d,  $J = 8.3$  Hz, 2H), 7.85 (d,  $J = 8.4$  Hz, 2H), 3.12 (s, 3H);

$^{19}\text{F}$  NMR ( $\text{CDCl}_3$ , 376 MHz)  $\delta$  -84.95 (s, 3F), -115.85 (s, 2F);

$^{13}\text{C}$  NMR ( $\text{CDCl}_3$ , 100 MHz)  $\delta$  144.30, 134.05 (t,  $J = 24.2$  Hz), 128.08, 127.94 (t,  $J = 6.0$  Hz), 118.84 (qt,  $J = 286.1, 38.4$  Hz), 112.80 (tq,  $J = 255.1, 38.7$  Hz), 44.38;

MS (EI,  $m/z$ ): 274 ( $\text{M}^+$ );

HRMS (EI): Calcd for:  $\text{C}_9\text{H}_7\text{F}_5\text{O}_2\text{S}^+$ , 274.0087, found: 274.0089.

All the characterization data are consistent with the previous report<sup>[14]</sup>.

#### 1,4-dibromo-2-(perfluoroethyl)benzene (2e):

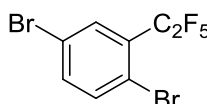

Yellow liquid (97 mg, 69%);  $^1\text{H}$  NMR ( $\text{CDCl}_3$ , 400 MHz)  $\delta$  7.74 (d,  $J = 2.3$  Hz, 1H), 7.59 (d,  $J = 8.5$  Hz, 1H), 7.50 (dd,  $J = 8.5, 2.3$  Hz, 1H);

$^{19}\text{F}$  NMR ( $\text{CDCl}_3$ , 376 MHz)  $\delta$  -83.50 (s, 3F), -111.48 (s, 2F);

$^{13}\text{C}$  NMR ( $\text{CDCl}_3$ , 100 MHz)  $\delta$  137.29, 136.28, 133.05 (t,  $J = 9.1$  Hz), 129.95 (t,  $J = 23.1$  Hz), 121.59, 119.58 (t,  $J = 2.8$  Hz), 119.04 (qt,  $J = 287.4, 38.2$  Hz), 112.55 (tq,  $J = 257.9, 39.7$  Hz)

MS (EI,  $m/z$ ): 352 ( $\text{M}^+$ );

HRMS (EI): Calcd for:  $\text{C}_8\text{H}_3\text{Br}_2\text{F}_5^+$ , 351.8522, found: 351.8518.

IR (film): 2921, 2852, 1463, 1382, 1351, 1286, 1207, 1159, 1132, 1097, 1036, 979, 820, 734  $\text{cm}^{-1}$ .

#### 1-nitro-4-(perfluoroethyl)benzene (2f):

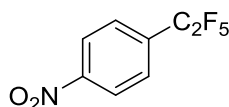

Yellow liquid (67 mg, 70%);  $^1\text{H}$  NMR ( $\text{CDCl}_3$ , 400 MHz)  $\delta$  8.39 (d,  $J = 8.8$  Hz, 2H), 7.84 (d,  $J = 8.8$  Hz, 2H);

$^{19}\text{F}$  NMR ( $\text{CDCl}_3$ , 376 MHz)  $\delta$  -84.94 (s, 3F), -115.80 (s, 2F);  
 $^{13}\text{C}$  NMR ( $\text{CDCl}_3$ , 100 MHz)  $\delta$  150.38, 134.74 (t,  $J = 24.3$  Hz), 128.18 (t,  $J = 6.1$  Hz), 124.12, 118.84 (qt,  $J = 286.2, 38.4$  Hz), 112.79 (tq,  $J = 253.8, 38.9$  Hz).  
MS (EI,  $m/z$ ): 241 ( $\text{M}^+$ );  
HRMS (EI): Calcd for:  $\text{C}_8\text{H}_4\text{F}_5\text{NO}_2^+$ , 241.0162, found: 241.0169.  
All the characterization data are consistent with the previous report<sup>[3]</sup>.

### 1-nitro-2-(perfluoroethyl)benzene (2g)

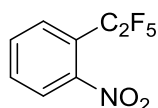

Yellow oil (64 mg, 66%);  $^1\text{H}$  NMR (400 MHz,  $\text{CDCl}_3$ )  $\delta$  7.78 – 7.72 (m, 3H), 7.67 (d,  $J = 6.8$  Hz, 1H).

$^{19}\text{F}$  NMR (376 MHz,  $\text{CDCl}_3$ )  $\delta$  -83.50 (s, 3F), -110.02 (s, 2F).  
 $^{13}\text{C}$  NMR (126 MHz,  $\text{CDCl}_3$ )  $\delta$  149.58, 133.59, 131.68, 129.62 (t,  $J = 7.3$  Hz), 124.50, 121.07 (t,  $J = 24.6$  Hz), 118.72 (qt,  $J = 287.1, 37.9$  Hz), 112.61 (tq,  $J = 257.1, 40.0$  Hz).

All the characterization data are consistent with the previous report<sup>[3]</sup>.

### (R)-3-(4-(2-chloro-5-(perfluoroethyl)benzyl)phenoxy)tetrahydrofuran (2h)

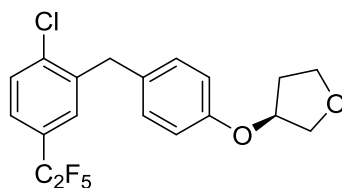

Yellow oil (122 mg, 75%);  $^1\text{H}$  NMR ( $\text{CDCl}_3$ , 400 MHz)  $\delta$  7.50 (d,  $J = 8.2$  Hz, 1H), 7.39 (d,  $J = 8.9$  Hz, 2H), 7.08 (d,  $J = 8.1$  Hz, 2H), 6.81 (d,  $J = 8.1$  Hz, 2H), 4.89 (s, 1H), 4.08 (s, 2H), 4.01-3.95 (m, 3H), 3.92-3.87 (m, 1H), 2.20-2.15 (m, 2H).

$^{19}\text{F}$  NMR ( $\text{CDCl}_3$ , 376 MHz)  $\delta$  -84.81 (s, 3F), -114.90 (s, 2F).  
 $^{13}\text{C}$  NMR ( $\text{CDCl}_3$ , 126 MHz)  $\delta$  156.22, 140.17, 138.41, 130.66, 130.17, 130.02, 128.85 (t,  $J = 6.4$  Hz), 127.43 (t,  $J = 24.3$  Hz), 125.68 (t,  $J = 6.4$  Hz), 119.01 (qt,  $J = 285.9, 39.3$  Hz), 115.59, 113.14 (tq,  $J = 254.5, 38.5$  Hz), 77.37, 73.16, 67.25, 38.43, 33.06.

All the characterization data are consistent with the previous report<sup>[3]</sup>.

### (8S,9S,13S,14R)-13-methyl-17-oxo-7,8,9,11,12,13,14,15,16,17-decahydro-6H-cyclopenta[a]phenanthren-3-yl-4-(perfluoroethyl)benzenesulfonate (2i):

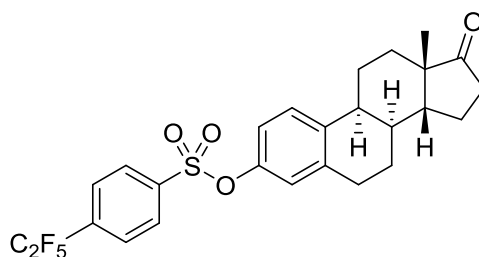

Yellow solid (80 mg, 76%);  $^1\text{H NMR}$  ( $\text{CDCl}_3$ , 400 MHz)  $\delta$  8.02 (d,  $J = 8.2$  Hz, 2H), 7.80 (d,  $J = 8.2$  Hz, 2H), 7.21 (d,  $J = 8.7$  Hz, 1H), 6.77 – 6.65 (m, 2H), 2.82 (s, 2H), 2.51 (dd,  $J = 19.0, 8.6$  Hz, 1H), 2.40 – 1.87 (m, 6H), 1.72 – 1.37 (m, 6H), 0.91 (s, 3H).

$^{19}\text{F NMR}$  ( $\text{CDCl}_3$ , 376 MHz)  $\delta$  -84.96 (s, 3F), -116.01 (s, 2F).

$^{13}\text{C NMR}$  ( $\text{CDCl}_3$ , 100 MHz)  $\delta$  220.77, 147.25, 139.55, 139.40, 138.84, 134.27 (t,  $J = 24.3$  Hz), 129.04, 127.60 (t,  $J = 6.2$  Hz), 126.85, 122.30, 119.14, 118.79 (qt,  $J = 286.1, 38.5$  Hz), 112.73 (tq,  $J = 255.1, 38.6$  Hz), 50.46, 47.97, 44.17, 37.88, 35.91, 31.56, 29.37, 26.22, 25.74, 21.65, 13.89.

All the characterization data are consistent with the previous report<sup>[3]</sup>.

### 2-(perfluoroethyl)thiophene (2j):

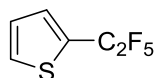

Yield: 56%;

$^{19}\text{F NMR}$  (376 MHz)  $\delta$  -85.67 (s, 3F), -104.60 (s, 2F).

The yield was determined by  $^{19}\text{F NMR}$  using  $\text{PhCF}_3$  as the internal standard.

### 2-methyl-5-(perfluoroethyl)furan (2k):

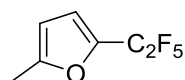

Yield: 58%;

$^{19}\text{F NMR}$  (376 MHz)  $\delta$  -84.98 (s, 3F), -113.65 (s, 2F).

The yield was determined by  $^{19}\text{F NMR}$  using  $\text{PhCF}_3$  as the internal standard.

### 1-methyl-2-(perfluoroethyl)-1H-pyrrole (2l):

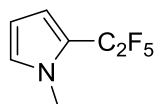

Yield: 76%;

$^{19}\text{F NMR}$  (376 MHz)  $\delta$  -84.04 (s, 3F), -106.22 (s, 2F).

The yield was determined by  $^{19}\text{F NMR}$  using  $\text{PhCF}_3$  as the internal standard.

### 3-(perfluoroethyl)pyridine (2m):

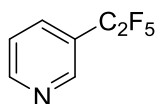

Yield: 95%;

$^{19}\text{F NMR}$  (376 MHz)  $\delta$  -85.86 (s, 3F), -116.02 (s, 2F).

The yield was determined by  $^{19}\text{F NMR}$  using  $\text{PhCF}_3$  as the internal standard.

### 4-(perfluoroethyl)pyridine (2n):

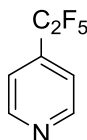

Yield: 85%;

$^{19}\text{F}$  NMR (376 MHz)  $\delta$  -85.49 (s, 3F), -117.56 (s, 2F).

The yield was determined by  $^{19}\text{F}$  NMR using  $\text{PhCF}_3$  as the internal standard.

**5-(perfluoroethyl)pyrimidine (2o):**

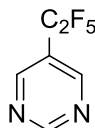

Yield: 89%;

$^{19}\text{F}$  NMR (376 MHz)  $\delta$  -85.91 (s, 3F), -116.81 (s, 2F).

The yield was determined by  $^{19}\text{F}$  NMR using  $\text{PhCF}_3$  as the internal standard.

**4-(perfluoroethyl)isoquinoline (2p):**

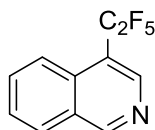

Yellow liquid (76 mg, 77%);  $^1\text{H}$  NMR ( $\text{CDCl}_3$ , 400 MHz)  $\delta$  9.40 (s, 1H), 8.82 (s, 1H), 8.19 (d,  $J = 8.0$  Hz, 1H), 8.07 (d,  $J = 7.9$  Hz, 1H), 7.87-7.79 (m, 1H), 7.71 (t,  $J = 7.2$  Hz, 1H);

$^{19}\text{F}$  NMR ( $\text{CDCl}_3$ , 376 MHz)  $\delta$  -84.21 (s, 3F), -110.40 (s, 2F);

$^{13}\text{C}$  NMR ( $\text{CDCl}_3$ , 100 MHz)  $\delta$  157.35, 143.72 (t,  $J = 10.0$  Hz), 132.47, 132.32, 128.85, 128.58, 128.19, 124.23-123.67 (m), 119.46 (qt,  $J = 286.7, 38.5$  Hz), 118.72 (t,  $J = 21.8$  Hz), 114.81 (tq,  $J = 255.8, 39.6$  Hz).

MS (EI,  $m/z$ ): 247 ( $\text{M}^+$ );

HRMS (EI): Calcd for:  $\text{C}_{11}\text{H}_6\text{F}_5\text{N}^+$ , 247.0415, found: 247.0418.

IR (film): 3060, 3017, 2965, 2917, 2865, 1623, 1586, 1570, 1508, 1372, 1329, 1298, 1264, 1047, 942, 908  $\text{cm}^{-1}$ .

**4-(perfluoroethyl)quinoline (2q):**

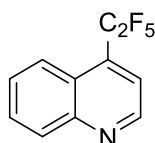

Yellow liquid (60 mg, 61%);  $^1\text{H}$  NMR ( $\text{CDCl}_3$ , 400 MHz)  $\delta$  9.06 (d,  $J = 4.2$  Hz, 1H), 8.24 (d,  $J = 8.6$  Hz, 2H), 8.20 (d,  $J = 8.7$  Hz, 1H), 7.86-7.78 (m, 2H), 7.74-7.63 (m, 2H);

$^{19}\text{F}$  NMR ( $\text{CDCl}_3$ , 376 MHz)  $\delta$  -83.75 (s, 3F), -111.08 (s, 2F);

$^{13}\text{C}$  NMR ( $\text{CDCl}_3$ , 100 MHz)  $\delta$  149.41, 149.28, 133.19 (t,  $J = 22.8$  Hz), 130.84,

130.24, 128.44, 124.62, 124.05, 120.63 (t,  $J = 8.4$  Hz), 119.26 (qt,  $J = 285.3, 37.6$  Hz), 114.25 (tq,  $J = 256.09, 39.7$  Hz);

**MS (EI,  $m/z$ ):** 247 ( $M^+$ );

**HRMS (EI):** Calcd for:  $C_{11}H_6F_5N^+$ , 247.0420, found: 247.0425.

All the characterization data are consistent with the previous report<sup>[15]</sup>.

### 3-(perfluoroethyl)quinoline (2r):

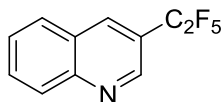

Yellow liquid (85 mg, 86%);  **$^1H$  NMR** ( $CDCl_3$ , 400 MHz)  $\delta$  9.13 – 9.03 (m, 1H), 8.44 (s, 1H), 8.21 (d,  $J = 8.5$  Hz, 1H), 7.93 (d,  $J = 8.2$  Hz, 1H), 7.87 (t,  $J = 7.7$  Hz, 1H), 7.67 (t,  $J = 7.5$  Hz, 1H);

**$^{19}F$  NMR** ( $CDCl_3$ , 376 MHz)  $\delta$  -85.14 (s, 3F), -115.20 (s, 2F);

**$^{13}C$  NMR** ( $CDCl_3$ , 100 MHz)  $\delta$  149.55, 146.63 (t,  $J = 5.35$  Hz), 135.79 (t,  $J = 6.61$  Hz), 132.12, 129.76, 128.74, 128.18, 126.47, 121.98 (t,  $J = 24.19$  Hz), 119.12 (qt,  $J = 286.0, 38.90$  Hz), 113.17 (tq,  $J = 254.85, 39.06$  Hz);

**MS (EI,  $m/z$ ):** 247 ( $M^+$ );

**HRMS (EI):** Calcd for:  $C_{11}H_6F_5N^+$ , 247.0420, found: 247.0432.

All the characterization data are consistent with the previous report<sup>[16]</sup>.

### 3-(perfluoroethyl)-1-tosyl-1H-indole (2s):

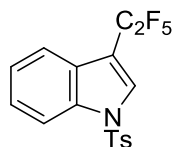

Light yellow solid (100 mg, 86%). Mp: 102-104 °C;  **$^1H$  NMR** ( $CDCl_3$ , 400 MHz)  $\delta$  7.93-7.83 (m, 2H), 7.71 (d,  $J = 8.2$  Hz, 2H), 7.54 (d,  $J = 7.9$  Hz, 1H), 7.28 (t,  $J = 7.8$  Hz, 1H), 7.19 (t,  $J = 7.6$  Hz, 1H), 7.13 (d,  $J = 8.1$  Hz, 2H), 2.21 (s, 3H);

**$^{19}F$  NMR** ( $CDCl_3$ , 376 MHz)  $\delta$  -85.19 (s, 3F), -111.24 (s, 2F);

**$^{13}C$  NMR** ( $CDCl_3$ , 100 MHz)  $\delta$  146.12, 134.87, 134.61, 130.38, 127.62 (t,  $J = 8.5$  Hz), 127.26, 126.41, 125.94, 124.42, 120.90, 119.27 (qt,  $J = 285.8, 39.0$  Hz), 113.76, 112.96 (tq,  $J = 249.85, 40.10$  Hz), 110.91 (t,  $J = 28.0$  Hz), 21.69.

**MS (FI,  $m/z$ ):** 389 ( $M^+$ );

**HRMS (FI):** Calcd for:  $C_{17}H_{12}F_5NO_2S^+$ , 389.0503, found: 389.0508.

**IR** (film): 3112, 2927, 1596, 1566, 1493, 1382, 1333, 1253, 1211, 1191, 1177, 1141, 1090, 1022, 990, 751, 666  $cm^{-1}$ .

### 3-(perfluoroethyl)-1-(phenylsulfonyl)-1H-pyrrolo[2,3-b]pyridine (2t):

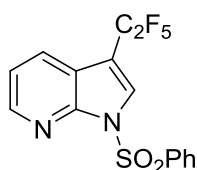

Yellow solid (101 mg, 67%). Mp: 117-119 °C;  $^1\text{H NMR}$  ( $\text{CDCl}_3$ , 400 MHz)  $\delta$  8.52 (d,  $J = 4.6$  Hz, 1H), 8.28 (d,  $J = 7.5$  Hz, 2H), 8.11 (s, 1H), 7.97 (d,  $J = 7.8$  Hz, 1H), 7.65 (t,  $J = 7.5$  Hz, 1H), 7.55 (t,  $J = 7.3$  Hz, 2H), 7.32-7.27 (m, 1H);

$^{19}\text{F NMR}$  ( $\text{CDCl}_3$ , 376 MHz)  $\delta$  -85.33 (s, 3F), -111.57 (s, 2F)

$^{13}\text{C NMR}$  ( $\text{CDCl}_3$ , 100 MHz)  $\delta$  146.69, 146.51, 137.55, 134.93, 129.53, 129.43, 128.71, 127.37 (t,  $J = 8.0$  Hz), 120.07, 119.14 (qt,  $J = 283.9, 38.9$  Hz), 119.10, 112.61 (tq,  $J = 249.5, 40.2$  Hz), 107.81 (t,  $J = 28.7$  Hz).

**MS (EI,  $m/z$ ):** 376 ( $\text{M}^+$ );

**HRMS (EI):** Calcd for:  $\text{C}_{15}\text{H}_9\text{F}_5\text{N}_2\text{O}_2\text{S}^+$ , 376.0305, found: 376.0301.

**IR (film):** 3145, 3069, 2923, 2917, 2853, 1678, 1597, 1558, 1480, 1449, 1401, 1386, 1336, 1247, 1194, 1179, 1126, 989, 919  $\text{cm}^{-1}$ .

#### 4-fluoro-1-isopropyl-2-methyl-6-(perfluoroethyl)-1H-benzo[d]imidazole (**2u**):

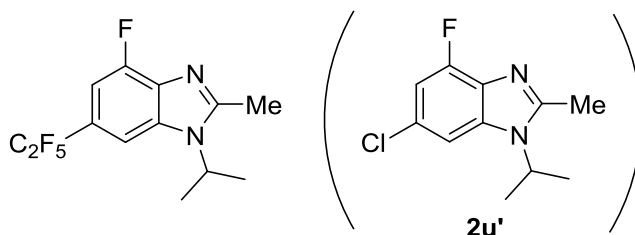

Yellow liquid (106 mg, 85%);  $^1\text{H NMR}$  ( $\text{CDCl}_3$ , 400 MHz)  $\delta$  7.45 (s, 1H), 7.06 (dd,  $J = 10.1, 5.0$  Hz, 1H), 4.66 (dtd,  $J = 13.9, 7.0, 3.6$  Hz, 1H), 2.61 (d,  $J = 4.9$  Hz, 3H), 1.59 (dd,  $J = 7.0, 4.9$  Hz, 6H);

$^{19}\text{F NMR}$  ( $\text{CDCl}_3$ , 376 MHz)  $\delta$  -85.09 (d,  $J = 10.9$  Hz, 3F), -113.08 (d,  $J = 6.7$  Hz, 2F), -127.25 (d,  $J = 9.8$  Hz, 1F);

$^{13}\text{C NMR}$  ( $\text{CDCl}_3$ , 100 MHz)  $\delta$  154.06, 153.20 (d,  $J = 253.9$  Hz), 136.30 (d,  $J = 9.4$  Hz), 134.21 (d,  $J = 16.6$  Hz), 122.27 (td,  $J = 24.6, 7.1$  Hz), 119.14 (qt,  $J = 285.9, 40.0$  Hz), 113.49 (tqd,  $J = 252.9, 38.2, 1.7$  Hz), 106.06 (dd,  $J = 10.4, 6.9$  Hz), 105.64 (dt,  $J = 21.2, 6.2$  Hz), 48.79, 21.31, 15.01.

**MS (EI,  $m/z$ ):** 310 ( $\text{M}^+$ );

**HRMS (EI):** Calcd for:  $\text{C}_{13}\text{H}_{12}\text{F}_6\text{N}_2^+$ , 310.0905, found: 310.0909.

**IR (film):** 2992, 2942, 1636, 1591, 1517, 1492, 1452, 1441, 1373, 1324, 1257, 1209, 1189, 1095, 896, 885, 861  $\text{cm}^{-1}$ .

The ratio of the pentafluorinated product and the chlorinated byproduct was 11:1.

#### 5-(perfluoroethyl)benzo[d]thiazole (**2v**):

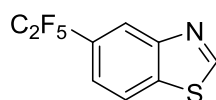

Yellow liquid (61 mg, 60%);  $^1\text{H NMR}$  ( $\text{CDCl}_3$ , 400 MHz)  $\delta$  9.13 (s, 1H), 8.42 (s, 1H), 8.10 (d,  $J = 8.5$  Hz, 2H), 7.66 (d,  $J = 8.5$  Hz, 2H);

$^{19}\text{F NMR}$  ( $\text{CDCl}_3$ , 376 MHz)  $\delta$  -85.07 (s, 3F), -114.26 (s, 2F);

$^{13}\text{C NMR}$  ( $\text{CDCl}_3$ , 100 MHz)  $\delta$  156.16, 153.11, 137.63, 127.29 (t,  $J = 24.4$  Hz), 123.09 (t,  $J = 5.8$  Hz), 122.73, 122.53 (t,  $J = 6.8$  Hz), 119.24 (qt,  $J = 286.1, 39.4$  Hz), 113.57 (tq,  $J = 252.8, 38.3$  Hz).



**MS (FI,  $m/z$ ):** 253 ( $M^+$ );

**HRMS (FI):** Calcd for:  $C_9H_4F_5NS^+$ , 252.9979, found: 252.9983.

**IR (film):** 3078, 2916, 2847, 1608, 1472, 1448, 1415, 1321, 1301, 1204, 1176, 1134, 1088, 1063, 998, 828  $cm^{-1}$ .

### 3-(perfluoroethyl)benzo[*b*]thiophene (2w)

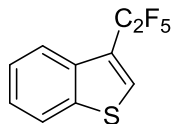

Colorless liquid (84 mg, 83%);  $^1H$  NMR ( $CDCl_3$ , 400 MHz)  $\delta$  8.00 (d,  $J = 7.9$  Hz, 1H), 7.92-7.90 (m, 2H), 7.51 – 7.42 (m, 2H).

$^{19}F$  NMR ( $CDCl_3$ , 376 MHz)  $\delta$  -84.69 (s, 3F), -110.68 (s, 2F).

$^{13}C$  NMR ( $CDCl_3$ , 100 MHz)  $\delta$  140.52, 135.31, 130.92 (t,  $J = 8.1$  Hz), 125.48, 125.47, 124.26 (t,  $J = 26.1$  Hz), 123.40 (t,  $J = 1.0$  Hz), 122.92, 119.37 (qt,  $J = 286.4, 39.1$  Hz), 113.07 (tq,  $J = 253.0, 39.7$  Hz).

All the characterization data are consistent with the previous report<sup>[17]</sup>.

### 2-(Perfluoroethyl)benzo[*b*]thiophene (2x):

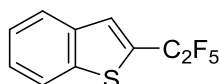

Yellow liquid (79 mg, 78%);  $^1H$  NMR ( $CDCl_3$ , 400 MHz):  $\delta$  7.97 (d,  $J = 7.8$  Hz, 1H), 7.89 (s, 1H), 7.87 (d,  $J = 1.4$  Hz, 1H), 7.44 (pd,  $J = 7.1, 1.3$  Hz, 2H);

$^{19}F$  NMR ( $CDCl_3$ , 376 MHz)  $\delta$  -84.68 (s, 3F), -110.69 (s, 2F);

$^{13}C$  NMR ( $CDCl_3$ , 100 MHz)  $\delta$  140.52, 135.32, 130.93 (t,  $J = 7.7$  Hz), 125.49, 125.47, 124.26 (t,  $J = 26.2$  Hz), 123.41 (m), 122.92, 119.36 (qt,  $J = 286.22, 39.07$  Hz),  $\delta$  113.06 (tq,  $J = 252.92, 39.66$  Hz).

**MS (EI,  $m/z$ ):** 252 ( $M^+$ );

**HRMS (EI):** Calcd for:  $C_{10}H_5F_5S^+$ , 252.0032, found: 252.0028.

**IR (film):** 3112, 2926, 2852, 1559, 1524, 1463, 1428, 1369, 1331, 1201, 1174, 1153, 1128, 1069, 1044, 920, 842, 757  $cm^{-1}$ .

### (*E*)-4-(3,3,4,4,4-pentafluorobut-1-en-1-yl)-1,1'-biphenyl (2y):

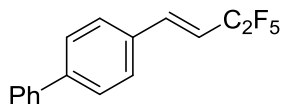

White solid (80 mg, 67%). Mp: 107-109 °C;  $^1H$  NMR ( $CDCl_3$ , 400 MHz)  $\delta$  7.61-7.55 (m, 4H), 7.49 (d,  $J = 7.9$  Hz, 2H), 7.43 (t,  $J = 7.5$  Hz, 2H), 7.35 (t,  $J = 6.8$  Hz, 1H), 7.19 (d,  $J = 16.3$  Hz, 1H), 6.19 (dd,  $J = 27.9, 12.0$  Hz, 1H);

$^{19}F$  NMR ( $CDCl_3$ , 376 MHz)  $\delta$  -85.53 (s, 3F), -115.23 (d,  $J = 12.0$  Hz, 2F);

$^{13}C$  NMR ( $CDCl_3$ , 100 MHz)  $\delta$  143.13, 140.22, 139.35 (t,  $J = 9.1$  Hz), 132.59, 129.07, 128.25, 128.04, 127.73, 127.20, 119.25 (qt,  $J = 285.6, 38.6$  Hz), 114.05 (t,  $J = 23.1$  Hz), 112.99 (tq,  $J = 248.9, 38.5$  Hz);

**MS (EI,  $m/z$ ):** 298 ( $M^+$ );

**HRMS (EI):** Calcd for:  $C_{16}H_{11}F_5^+$ , 298.0781, found: 298.0789.

All the characterization data are consistent with the previous report<sup>[16]</sup>.

**(*E*)-1-chloro-4-(3,3,4,4,4-pentafluorobut-1-en-1-yl)benzene (2z):**

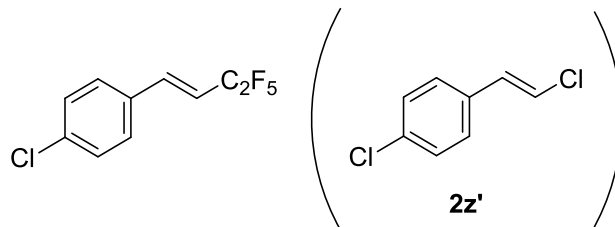

Yellow liquid (72 mg, 70%);  $^1H$  NMR ( $CDCl_3$ , 400 MHz)  $\delta$  7.40 (d,  $J = 8.6$  Hz, 2H), 7.37 (d,  $J = 8.8$  Hz, 2H), 7.13 (dd,  $J = 16.2, 2.0$  Hz, 1H), 6.15 (dt,  $J = 16.2, 11.8$  Hz, 1H);

$^{19}F$  NMR ( $CDCl_3$ , 376 MHz)  $\delta$  -85.55 (d,  $J = 2.2$  Hz, 3F), -114.38 - -117.42 (m, 2F);

$^{13}C$  NMR ( $CDCl_3$ , 100 MHz)  $\delta$  138.55 (t,  $J = 9.3$  Hz), 136.31, 132.13, 129.38, 128.97, 119.12 (qt,  $J = 285.6, 38.4$  Hz), 114.86 (t,  $J = 23.2$  Hz), 112.76 (tq,  $J = 249.2, 38.7$  Hz).

**MS (FI,  $m/z$ ):** 256 ( $M^+$ );

**HRMS (FI):** Calcd for:  $C_{10}H_6F_5Cl^+$ , 256.0073, found: 256.0071.

**IR (film):** 2927, 2857, 1661, 1595, 1493, 1408, 1344, 1324, 1304, 1196, 1099, 1036, 1014, 972, 809, 792  $cm^{-1}$ .

**(*E*)-4-(3,3,4,4,4-pentafluorobut-1-en-1-yl)benzonitrile (2aa):**

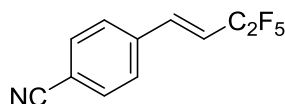

Yellow liquid (91 mg, 92%);  $^1H$  NMR ( $CDCl_3$ , 400 MHz)  $\delta$  7.68 (d,  $J = 8.4$  Hz, 2H), 7.57 (d,  $J = 8.2$  Hz, 2H), 7.20 (d,  $J = 16.2$  Hz, 1H), 6.30 (dt,  $J = 16.2, 11.6$  Hz, 1H);

$^{19}F$  NMR ( $CDCl_3$ , 376 MHz)  $\delta$  -85.37 (s, 3F), -115.90 (d,  $J = 11.6$  Hz, 2F);

$^{13}C$  NMR ( $CDCl_3$ , 100 MHz)  $\delta$  138.00 (t,  $J = 9.2$  Hz), 137.77, 132.82, 128.24, 118.29, 118.94 (qt,  $J = 283.8, 37.9$  Hz), 117.89 (t,  $J = 23.3$  Hz), 113.71, 112.40 (tq,  $J = 249.6, 38.8$  Hz);

**MS (EI,  $m/z$ ):** 247 ( $M^+$ );

**HRMS (EI):** Calcd for:  $C_{11}H_6F_5N^+$ , 247.0420, found: 247.0429.

**IR (film):** 3066, 2928, 2857, 2230, 1662, 1607, 1563, 1504, 1413, 1345, 1329, 1303, 1197, 1104, 1037, 975, 955, 820, 686  $cm^{-1}$ .

## 4.2 General Procedures for Pentafluoroethylation of Acetylenes

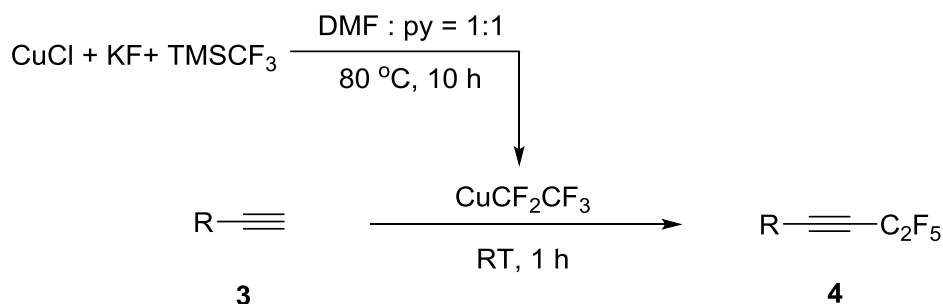

### Typical Procedures:

To an oven-dried sealed tube were added CuCl (2.25 mmol, 222.9 mg, 5.0 equiv) and KF (1.5 mmol, 87.2 mg, 3.3 equiv) in glove box. Then in fume hood, DMF (3 mL), TMSCF<sub>3</sub> (1.5 mmol, 220 μL, 3.3 equiv) and pyridine (3 mL) were successively added under N<sub>2</sub> atmosphere. After stirred at room temperature for 5 minutes, the reaction mixture was immersed into 80 °C oil bath and stirred for 10 hours. Then the reaction mixture was cooled to room temperature and stirred under air for 5 minutes. The mixture turned black, and alkyne **3** (0.45 mmol, 1.0 equiv) dissolved in DMF (1.5 mL) was added slowly in 15 minutes using a syringe pump. The reaction mixture was stirred at room temperature under air for additional 1 hour. After the reaction was completed, the reaction mixture was quenched with 50 mL 3.0 M HCl solution or 20 mL ammonium hydroxide, extracted with CH<sub>2</sub>Cl<sub>2</sub> (30 mL × 3). The combined organic layer was washed with H<sub>2</sub>O (30 mL × 2) and brine (40 mL), dried over Na<sub>2</sub>SO<sub>4</sub>, concentrated under vacuum. The residue was purified by column chromatography on silica gel to afford **4**.

### 1-(4-(Perfluorobut-1-yn-1-yl)phenyl)ethan-1-one (**4b**)

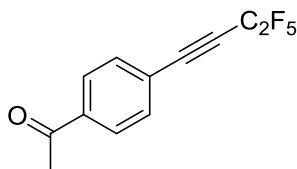

Quenched with 3.0 M HCl, eluted with pentane/dichloromethane to give **4b** (71 mg, 60% yield).

Yellow solid. Mp: 35–37 °C. <sup>1</sup>H NMR (CDCl<sub>3</sub>, 400 MHz) δ 7.98 (d, *J* = 8.4 Hz, 2H), 7.67 (d, *J* = 8.4 Hz, 2H), 2.62 (s, 3H);

<sup>19</sup>F NMR (CDCl<sub>3</sub>, 376 MHz)  $\delta$  -85.6 (t,  $J$  = 4.1 Hz, 3F), -102.2 (q,  $J$  = 4.1 Hz, 2F);  
<sup>13</sup>C NMR (CDCl<sub>3</sub>, 100 MHz)  $\delta$  197.0, 138.7, 132.9 (t,  $J$  = 2.5 Hz), 128.5, 123.0 (t,  $J$  = 3.1 Hz), 118.0 (qt,  $J$  = 280.0, 34.2 Hz), 105.6 (tq,  $J$  = 244.0, 42.0 Hz), 90.1 (t,  $J$  = 6.3 Hz), 77.0 (t,  $J$  = 36.4 Hz), 26.8;  
MS (EI,  $m/z$ , %): 262 (M<sup>+</sup>, 21.25), 247 (100.00);  
HRMS (EI): Calcd. For C<sub>12</sub>H<sub>7</sub>OF<sub>5</sub>: 262.0412; Found: 262.0415  
IR (film): 2928, 2247, 1693, 1605, 1562, 1431, 1361, 1283, 1262, 1218, 1184, 1152, 1117, 1039, 959, 832, 758, 695, 646, 591 cm<sup>-1</sup>.

#### 4-(Perfluorobut-1-yn-1-yl)benzotrile (4c)

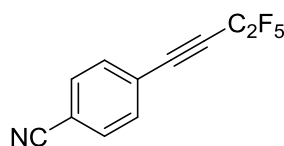

Quenched with 3.0 M HCl, eluted with pentane/dichloromethane to give **4c** (59 mg, 53% yield).

Yellow solid. Mp: 35–38 °C. <sup>1</sup>H NMR (CDCl<sub>3</sub>, 400 MHz)  $\delta$  7.72 (d,  $J$  = 8.4 Hz, 2H), 7.69 (d,  $J$  = 8.4 Hz, 2H);

<sup>19</sup>F NMR (CDCl<sub>3</sub>, 376 MHz)  $\delta$  -85.6 (t,  $J$  = 4.1 Hz, 3F), -102.6 (q,  $J$  = 4.5 Hz, 2F);  
<sup>13</sup>C NMR (CDCl<sub>3</sub>, 100 MHz)  $\delta$  133.2 (t,  $J$  = 2.3 Hz), 132.4, 123.2 (t,  $J$  = 3.0 Hz), 117.9 (qt,  $J$  = 283.9, 36.6 Hz), 117.7, 114.9, 105.4 (tq,  $J$  = 244.5, 42.0 Hz), 88.9 (t,  $J$  = 6.3 Hz), 77.9 (t,  $J$  = 36.6 Hz);

MS (EI,  $m/z$ , %): 245 (M<sup>+</sup>, 30.21), 176 (100.00);

HRMS (EI): Calcd. For C<sub>11</sub>H<sub>4</sub>NF<sub>5</sub>: 245.0258; Found: 245.0267;

IR (film): 2925, 2251, 1276, 1260, 1232, 1154, 1040, 836, 764, 750 cm<sup>-1</sup>.

#### 1-Nitro-4-(perfluorobut-1-yn-1-yl)benzene (4d)

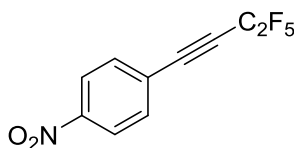

Quenched with 3.0 M HCl, eluted with pentane/ethyl acetate to give **4d** (62 mg, 52% yield).

Yellow solid. Mp: 63–66 °C. <sup>1</sup>H NMR (CDCl<sub>3</sub>, 400 MHz)  $\delta$  8.29 (d,  $J$  = 8.8 Hz, 2H), 7.77 (d,  $J$  = 8.4 Hz, 2H);

<sup>19</sup>F NMR (CDCl<sub>3</sub>, 376 MHz)  $\delta$  -85.5 (t,  $J$  = 4.5 Hz, 3F), -102.7 (q,  $J$  = 4.1 Hz, 2F);  
<sup>13</sup>C NMR (CDCl<sub>3</sub>, 100 MHz)  $\delta$  149.1, 133.7 (t,  $J$  = 2.4 Hz), 125.0 (t,  $J$  = 2.9 Hz), 124.0, 117.9 (qt,  $J$  = 283.9, 36.6 Hz), 105.4 (tq,  $J$  = 244.8, 42.2 Hz), 88.6 (t,  $J$  = 6.1 Hz), 78.4 (t,  $J$  = 36.7 Hz);

MS (EI,  $m/z$ , %): 265 (M<sup>+</sup>, 64.46), 169 (100.00);

HRMS (EI): Calcd. For C<sub>10</sub>H<sub>4</sub>NO<sub>2</sub>F<sub>5</sub>: 265.0157; Found: 265.0157;

IR (film): 3113, 2955, 2925, 2855, 2249, 1603, 1536, 1491, 1405, 1374, 1352, 1284, 116, 1154, 1118, 1040 913, 858, 818, 748, 686 cm<sup>-1</sup>.

#### Methyl 4-(perfluorobut-1-yn-1-yl)benzoate (**4e**)

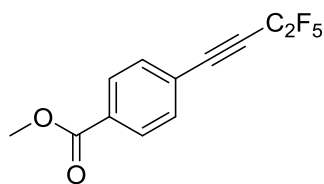

Quenched with 3.0 M HCl, eluted with pentane/dichloromethane to give **4e** (90 mg, 72% yield).

Yellow oil.  $^1\text{H NMR}$  ( $\text{CDCl}_3$ , 400 MHz)  $\delta$  8.07 (d,  $J = 8.0$  Hz, 2H), 7.65 (d,  $J = 8.0$  Hz, 2H), 3.95 (s, 3H);

$^{19}\text{F NMR}$  ( $\text{CDCl}_3$ , 376 MHz)  $\delta$  -85.2 (t,  $J = 4.1$  Hz, 3F), -101.7 (q,  $J = 4.1$  Hz, 2F);

$^{13}\text{C NMR}$  ( $\text{CDCl}_3$ , 100 MHz)  $\delta$  166.0, 132.6 (t,  $J = 2.2$  Hz), 132.4, 129.8, 122.9 (t,  $J = 2.8$  Hz), 118.0 (qt,  $J = 283.8, 36.9$  Hz), 105.6 (tq,  $J = 244.0, 42.1$  Hz), 90.2 (t,  $J = 6.2$  Hz), 76.7 (t,  $J = 36.3$  Hz), 52.6;

**MS (EI,  $m/z$ , %):** 278 ( $\text{M}^+$ , 32.35), 247 (100.00);

**HRMS (EI):** Calcd. For  $\text{C}_{12}\text{H}_7\text{O}_2\text{F}_5$ : 278.0361; Found: 278.0358;

**IR (film):** 2968, 2247, 1731, 1613, 1438, 1406, 1345, 1282, 1219, 1179, 1152, 1116, 1039, 1019, 918, 859, 809, 768, 747, 693, 674  $\text{cm}^{-1}$ .

#### 4-(Perfluorobut-1-yn-1-yl)benzoic acid (**4f**)

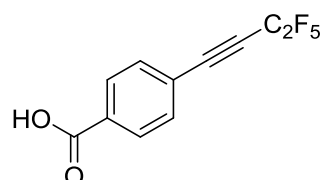

Quenched with 3.0 M HCl, eluted with petroleum ether/ethyl acetate to give **4f** (53 mg, 45% yield).

White solid. Mp: 192–194 °C.  $^1\text{H NMR}$  ( $\text{DMSO-}d_6$ , 400 MHz)  $\delta$  8.02 (d,  $J = 8.4$  Hz, 2H), 7.81 (d,  $J = 8.0$  Hz, 2H);

$^{19}\text{F NMR}$  ( $\text{DMSO-}d_6$ , 376 MHz)  $\delta$  -84.8 (t,  $J = 4.9$  Hz, 3F), -100.6 (q,  $J = 4.5$  Hz, 2F);

$^{13}\text{C NMR}$  ( $\text{DMSO-}d_6$ , 100 MHz)  $\delta$  166.3, 133.7, 132.9 (t,  $J = 2.3$  Hz), 129.8, 120.7 (t,  $J = 2.9$  Hz), 117.5 (qt,  $J = 283.9, 37.3$  Hz), 105.2 (tq,  $J = 242.8, 41.8$  Hz), 91.6 (t,  $J = 6.3$  Hz), 74.7 (t,  $J = 36.1$  Hz);

**MS (EI,  $m/z$ , %):** 264 ( $\text{M}^+$ , 49.83), 195 (100.00);

**HRMS (EI):** Calcd. For  $\text{C}_{11}\text{H}_5\text{O}_2\text{F}_5$ : 264.0204; Found: 264.0205;

**IR (film):** 3000, 2840, 2671, 2563, 2252, 1684, 1612, 1564, 1428, 1317, 1285, 1213, 1182, 1148, 1110, 1040, 927, 864, 770, 695  $\text{cm}^{-1}$ .

#### 1,2-Dimethoxy-4-(perfluorobut-1-yn-1-yl)benzene (**4g**)

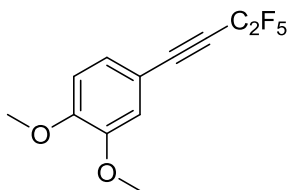

Quenched with 3.0 M HCl, eluted with petroleum ether/ethyl acetate to give **4g** (103 mg, 82% yield).

Colorless oil.  $^1\text{H NMR}$  ( $\text{CDCl}_3$ , 400 MHz)  $\delta$  7.20 (d,  $J = 8.0$  Hz, 1H), 7.01 (s, 1H), 6.85 (d,  $J = 8.4$  Hz, 1H), 3.92 (s, 3H), 3.90 (s, 3H);

$^{19}\text{F NMR}$  ( $\text{CDCl}_3$ , 376 MHz)  $\delta$  -85.7 (t,  $J = 4.5$  Hz, 3F), -101.0 (q,  $J = 4.5$  Hz, 2F);

$^{13}\text{C NMR}$  ( $\text{CDCl}_3$ , 100 MHz)  $\delta$  151.8, 149.0, 126.6 (t,  $J = 2.7$  Hz), 118.1 (qt,  $J = 283.7, 37.6$  Hz), 114.6, 111.1, 110.3, 105.8 (tq,  $J = 242.6, 41.9$  Hz), 92.1 (t,  $J = 6.1$  Hz), 73.4 (t,  $J = 36.2$  Hz), 55.9, 55.8;

**MS (EI,  $m/z$ , %):** 280 ( $\text{M}^+$ , 100.00), 247 (73.9);

**HRMS (EI):** Calcd. For  $\text{C}_{12}\text{H}_9\text{O}_2\text{F}_5$ : 280.0517; Found: 280.0522

**IR (film):** 3008, 2941, 2842, 2238, 1599, 1580, 1516, 1466, 1444, 1414, 1348, 1302, 1253, 1216, 1181, 1133, 1044, 935, 855, 809, 764, 717, 653, 619  $\text{cm}^{-1}$ .

#### 1-(Benzyloxy)-4-(perfluorobut-1-yn-1-yl)benzene (**4h**)

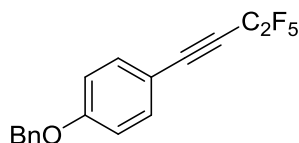

Quenched with 3.0 M HCl, eluted with petroleum ether to give **4h** (122 mg, 83% yield).

White solid. Mp: 36–37 °C.  $^1\text{H NMR}$  ( $\text{CDCl}_3$ , 400 MHz)  $\delta$  7.51 (d,  $J = 8.4$  Hz, 2H), 7.45–7.31 (m, 5H), 6.97 (d,  $J = 8.4$  Hz, 2H), 5.10 (s, 2H);

$^{19}\text{F NMR}$  ( $\text{CDCl}_3$ , 376 MHz)  $\delta$  -85.7 (t,  $J = 4.5$  Hz, 3F), -102.2 (q,  $J = 4.5$  Hz, 2F);

$^{13}\text{C NMR}$  ( $\text{CDCl}_3$ , 100 MHz)  $\delta$  161.0, 136.2, 134.4 (t,  $J = 2.4$  Hz), 128.9, 128.4, 127.6, 118.2 (qt,  $J = 283.7, 37.6$  Hz), 115.4, 110.7 (t,  $J = 3.0$  Hz), 105.9 (tq,  $J = 242.6, 41.8$  Hz), 92.1 (t,  $J = 6.1$  Hz), 73.9 (t,  $J = 36.1$  Hz), 70.3;

**MS (EI,  $m/z$ , %):** 326 ( $\text{M}^+$ , 5.8), 91 (100.00);

**HRMS (EI):** Calcd. For  $\text{C}_{17}\text{H}_{11}\text{OF}_5$ : 326.0725; Found: 326.0728.

**IR (film):** 2933, 2239, 1605, 1510, 1452, 1285, 1252, 1215, 1146, 1109, 1038, 832, 731, 696  $\text{cm}^{-1}$ .

#### *N,N*-dimethyl-4-(perfluorobut-1-yn-1-yl)aniline (**4i**)

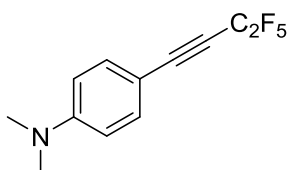

Quenched with ammonium hydroxide, eluted with petroleum ether/ethyl acetate to give **4i** (78 mg, 66% yield).

Yellow solid. Mp: 75–77 °C.  $^1\text{H NMR}$  ( $\text{CDCl}_3$ , 400 MHz)  $\delta$  7.41 (d,  $J = 8.8$  Hz, 2H), 6.62 (d,  $J = 8.8$  Hz, 2H), 3.02 (s, 6H);

$^{19}\text{F NMR}$  ( $\text{CDCl}_3$ , 376 MHz)  $\delta$  -85.7 (t,  $J = 4.5$  Hz, 3F), -100.0 (q,  $J = 4.9$  Hz, 2F);

$^{13}\text{C NMR}$  ( $\text{CDCl}_3$ , 100 MHz)  $\delta$  151.8, 134.0 (t,  $J = 2.5$  Hz), 118.4 (qt,  $J = 283.7$ , 38.0 Hz), 111.6, 106.3 (tq,  $J = 241.7$ , 41.6 Hz), 104.4 (t,  $J = 3.0$  Hz), 94.2 (t,  $J = 6.4$  Hz), 73.2 (t,  $J = 36.1$  Hz), 40.0;

**MS (EI,  $m/z$ , %)**: 263 ( $\text{M}^+$ , 100.00), 194 (78.57);

**HRMS (EI)**: Calcd. For  $\text{C}_{12}\text{H}_{10}\text{NF}_5$ : 263.0728; Found: 263.0739;

**IR (film)**: 2922, 2827, 2229, 1609, 1528, 1447, 1373, 1302, 1210, 1139, 1100, 1066, 1036, 816, 804, 703, 534  $\text{cm}^{-1}$ .

#### 4-(Perfluorobut-1-yn-1-yl)-1,1'-biphenyl (**4j**)

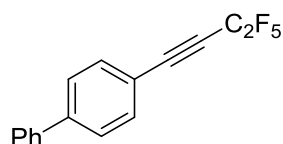

Quenched with 3.0 M HCl, eluted with petroleum ether to give **4j** (104 mg, 78% yield).

White solid. Mp: 59–61 °C.  $^1\text{H NMR}$  ( $\text{CDCl}_3$ , 400 MHz)  $\delta$  7.68–7.58 (m, 6H), 7.48 (t,  $J = 7.2$  Hz, 2H), 7.40 (t,  $J = 7.2$  Hz, 1H);

$^{19}\text{F NMR}$  ( $\text{CDCl}_3$ , 376 MHz)  $\delta$  -85.7 (t,  $J = 4.1$  Hz, 3F), -101.5 (q,  $J = 4.1$  Hz, 2F);

$^{13}\text{C NMR}$  ( $\text{CDCl}_3$ , 100 MHz)  $\delta$  144.0, 139.8, 133.1 (t,  $J = 2.7$  Hz), 129.2, 128.4, 127.4, 127.3, 118.2 (qt,  $J = 283.8$ , 37.3 Hz), 117.3 (t,  $J = 3.1$  Hz), 105.9 (tq,  $J = 243.1$ , 41.9 Hz), 91.6 (t,  $J = 6.2$  Hz), 75.2 (t,  $J = 36.1$  Hz);

**MS (EI,  $m/z$ , %)**: 296 ( $\text{M}^+$ , 78.71), 227 (100.00);

**HRMS (EI)**: Calcd. For  $\text{C}_{16}\text{H}_{19}\text{F}_5$ : 296.0619; Found: 296.0630.

**IR (film)**: 3089, 3041, 2243, 1486, 1447, 1405, 1344, 1292, 1214, 1151, 1120, 1042, 1020, 841, 764, 720, 710, 692, 558  $\text{cm}^{-1}$ .

#### 2,4-Dimethyl-1-(perfluorobut-1-yn-1-yl)benzene (**4k**)

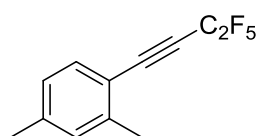

Quenched with 3.0 M HCl, eluted with pentane to give **4k** (79 mg, 71% yield).

Colorless oil.  $^1\text{H NMR}$  ( $\text{CDCl}_3$ , 400 MHz)  $\delta$  7.41 (d,  $J = 8.0$  Hz, 1H), 7.07 (s, 1H), 7.02 (d,  $J = 8.0$  Hz, 1H), 2.41 (s, 3H), 2.35 (s, 3H);

$^{19}\text{F NMR}$  ( $\text{CDCl}_3$ , 376 MHz)  $\delta$  -85.8 (t,  $J = 4.1$  Hz, 3F), -101.2 (q,  $J = 4.1$  Hz, 2F);

$^{13}\text{C NMR}$  ( $\text{CDCl}_3$ , 100 MHz)  $\delta$  142.0 (t,  $J = 2.1$  Hz), 141.8, 132.9 (t,  $J = 2.5$  Hz), 130.9, 126.9, 118.3 (qt,  $J = 283.7$ , 37.5 Hz), 115.5 (t,  $J = 2.8$  Hz), 106.0 (tq,  $J = 242.6$ ,

41.8 Hz), 91.4 (t,  $J = 5.2$  Hz), 77.9 (t,  $J = 36.2$  Hz), 21.7, 20.2;  
**MS (EI,  $m/z$ , %):** 248 ( $M^+$ , 100.00), 179 (87.39);  
**HRMS (EI):** Calcd. For  $C_{12}H_9F_5$ : 248.0619; Found: 248.0625;  
**IR (film):** 2927, 2239, 1612, 1497, 1452, 1345, 1291, 1222, 1068, 1113, 1037, 933, 817, 802, 735, 715, 657, 565  $cm^{-1}$ .

#### 1-(*tert*-Butyl)-4-(perfluorobut-1-yn-1-yl)benzene (**4l**)

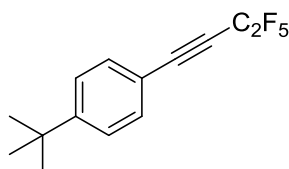

Quenched with 3.0 M HCl, eluted with pentane to give **4l** (96 mg, 77% yield).  
Colorless oil.  **$^1H$  NMR** ( $CDCl_3$ , 400 MHz)  $\delta$  7.50 (d,  $J = 8.4$  Hz, 2H), 7.42 (d,  $J = 8.4$  Hz, 2H), 1.32 (s, 9H);  
 **$^{19}F$  NMR** ( $CDCl_3$ , 376 MHz)  $\delta$  -85.8 (t,  $J = 4.9$  Hz, 3F), -101.3 (q,  $J = 4.1$  Hz, 2F);  
 **$^{13}C$  NMR** ( $CDCl_3$ , 100 MHz)  $\delta$  155.0, 132.5 (t,  $J = 2.3$  Hz), 125.9, 118.2 (qt,  $J = 283.7, 37.4$  Hz), 115.7 (t,  $J = 2.9$  Hz), 105.9 (tq,  $J = 242.8, 41.8$  Hz), 92.0 (t,  $J = 6.1$  Hz), 74.3 (t,  $J = 35.9$  Hz), 35.2, 31.2;  
**MS (EI,  $m/z$ , %):** 276 ( $M^+$ , 19.32), 261 (100.00);  
**HRMS (EI):** Calcd. For  $C_{14}H_{13}F_5$ : 276.0932; Found: 276.0944;  
**IR (film):** 2968, 2873, 2244, 1605, 1509, 1367, 1346, 1290, 1268, 1221, 1154, 1107, 1039, 913, 847, 836, 747, 685, 564  $cm^{-1}$ .

#### 9,9-Dimethyl-2-(perfluorobut-1-yn-1-yl)-9H-fluorene (**4m**)

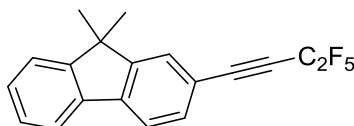

Quenched with 3.0 M HCl, eluted with petroleum ether to give **4m** (120 mg, 79% yield).  
Colorless oil.  **$^1H$  NMR** ( $CDCl_3$ , 400 MHz)  $\delta$  7.78–7.71 (m, 2H), 7.63(s, 1H), 7.56 (d,  $J = 8.0$  Hz, 1H), 7.50–7.44 (m, 1H), 7.42–7.35 (m, 2H), 1.50 (s, 6H);  
 **$^{19}F$  NMR** ( $CDCl_3$ , 376 MHz)  $\delta$  -85.6 (t,  $J = 4.5$  Hz, 3F), -101.1 (q,  $J = 4.5$  Hz, 2F);  
 **$^{13}C$  NMR** ( $CDCl_3$ , 100 MHz)  $\delta$  154.3, 154.0, 142.4, 137.9, 132.0 (t,  $J = 2.4$  Hz), 128.8, 127.5, 127.0 (t,  $J = 2.5$  Hz), 123.0, 120.9, 120.3, 118.3 (qt,  $J = 283.7, 37.4$  Hz), 116.7 (t,  $J = 3.0$  Hz), 106.0 (tq,  $J = 242.9, 41.9$  Hz), 92.7 (t,  $J = 6.4$  Hz), 74.6 (t,  $J = 36.1$  Hz), 47.2, 27.0;  
**MS (EI,  $m/z$ , %):** 336 ( $M^+$ , 71.04), 321 (100.00);  
**HRMS (EI):** Calcd. For  $C_{19}H_{13}F_5$ : 336.0932; Found: 336.0932;  
**IR (film):** 2965, 2926, 2877, 2241, 1609, 1470, 1462, 1448, 1346, 1303, 1291, 1216, 1150, 1111, 1077, 1039, 1005, 913, 884, 833, 781, 758, 736, 721, 708, 567  $cm^{-1}$ .



### 1-Bromo-2-(perfluorobut-1-yn-1-yl)benzene (**4n**)

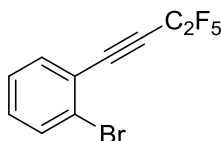

Quenched with 3.0 M HCl, eluted with pentane to give **4n** (97 mg, 72% yield).  
Colorless oil.  $^1\text{H NMR}$  ( $\text{CDCl}_3$ , 400 MHz)  $\delta$  7.69–7.62 (m, 1H), 7.61–7.54 (m, 1H), 7.39–7.30 (m, 2H);

$^{19}\text{F NMR}$  ( $\text{CDCl}_3$ , 376 MHz)  $\delta$  -85.5 (t,  $J = 4.1$  Hz, 3F), -102.3 (q,  $J = 4.1$  Hz, 2F);

$^{13}\text{C NMR}$  ( $\text{CDCl}_3$ , 100 MHz)  $\delta$  134.5 (t,  $J = 2.3$  Hz), 133.0, 132.3, 127.4, 126.4 (t,  $J = 2.6$  Hz), 121.3 (t,  $J = 3.0$  Hz), 118.1 (qt,  $J = 284.0, 36.8$  Hz), 105.7 (tq,  $J = 243.7, 42.1$  Hz), 89.6 (t,  $J = 6.2$  Hz), 78.5 (t,  $J = 36.5$  Hz);

**MS (EI,  $m/z$ , %):** 298 ( $\text{M}^+$ , 43), 229 (100.00);

**HRMS (EI):** Calcd. For  $\text{C}_{10}\text{H}_4\text{F}_5\text{Br}$ : 297.9411; Found: 297.9421;

**IR (film):** 2972, 2933, 2873, 2249, 1471, 1346, 1295, 1251, 1228, 1157, 1118, 1054, 1035, 913, 836, 748  $\text{cm}^{-1}$ .

### 1-Bromo-4-(perfluorobut-1-yn-1-yl)benzene (**4o**)

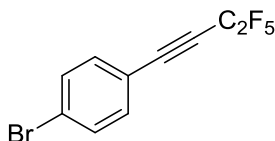

Quenched with 3.0 M HCl, eluted with pentane to give **4o** (87 mg, 65% yield).

Colorless oil.  $^1\text{H NMR}$  ( $\text{CDCl}_3$ , 400 MHz)  $\delta$  7.56 (d,  $J = 8.4$  Hz, 2H), 7.44 (d,  $J = 8.0$  Hz, 2H);

$^{19}\text{F NMR}$  ( $\text{CDCl}_3$ , 376 MHz)  $\delta$  -85.7 (t,  $J = 4.1$  Hz, 3F), -101.1 (q,  $J = 4.5$  Hz, 2F);

$^{13}\text{C NMR}$  ( $\text{CDCl}_3$ , 100 MHz)  $\delta$  134.0 (t,  $J = 2.5$  Hz), 132.3, 126.1, 118.0 (qt,  $J = 283.7, 37.0$  Hz), 117.6 (t,  $J = 2.9$  Hz), 105.7 (tq,  $J = 243.6, 42.2$  Hz), 90.3 (t,  $J = 6.3$  Hz), 75.7 (t,  $J = 36.3$  Hz);

**MS (EI,  $m/z$ , %):** 298 ( $\text{M}^+$ , 58.09), 229 (100.00);

**HRMS (EI):** Calcd. For  $\text{C}_{10}\text{H}_4\text{F}_5\text{Br}$ : 297.9411; Found: 297.9418;

**IR (film):** 2926, 2855, 2248, 1589, 1489, 1395, 1344, 1286, 1220, 1150, 1118, 1072, 1039, 1013, 910, 825, 749, 681  $\text{cm}^{-1}$ .

### 2-Methoxy-6-(perfluorobut-1-yn-1-yl)naphthalene (**4p**)

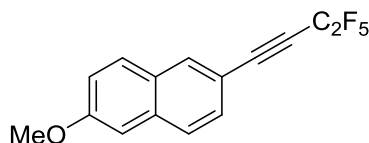

Quenched with 3.0 M HCl, eluted with petroleum ether to give **4p** (106 mg, 78% yield).

Red solid. Mp: 51–53 °C.  $^1\text{H NMR}$  ( $\text{CDCl}_3$ , 400 MHz)  $\delta$  8.05 (s, 1H), 7.74 (d,  $J = 3.6$

Hz, 1H), 7.72 (d,  $J = 3.2$  Hz, 1H), 7.51 (dd,  $J = 8.4, 1.6$  Hz, 1H), 7.21 (dd,  $J = 8.8, 2.4$  Hz, 1H), 7.13 (d,  $J = 2.8$  Hz, 1H), 3.94 (s, 3H);

$^{19}\text{F}$  NMR (CDCl<sub>3</sub>, 376 MHz)  $\delta$  -85.7 (t,  $J = 4.5$  Hz, 3F), -101.1 (q,  $J = 4.5$  Hz, 2F);

$^{13}\text{C}$  NMR (CDCl<sub>3</sub>, 100 MHz)  $\delta$  159.6, 135.7, 133.7 (t,  $J = 2.7$  Hz), 129.8, 128.4 (t,  $J = 2.2$  Hz), 128.1, 127.4, 120.3, 118.3 (qt,  $J = 283.8, 37.5$  Hz), 113.2 (t,  $J = 3.1$  Hz), 106.0, 105.9 (tq,  $J = 242.8, 41.9$  Hz), 92.5 (t,  $J = 6.4$  Hz), 79.2 (t,  $J = 36.1$  Hz), 55.5;

MS (EI,  $m/z$ , %): 300 ( $M^+$ , 100.00), 231 (65.18);

HRMS (EI): Calcd. For C<sub>15</sub>H<sub>9</sub>OF<sub>5</sub>: 300.0568; Found: 300.0580;

IR (film): 3004, 2970, 2844, 2237, 1630, 1604, 1500, 1484, 1415, 1393, 1336, 1288, 1263, 1220, 1166, 1142, 1109, 1037, 968, 894, 847, 801, 744, 693, 472 cm<sup>-1</sup>.

#### 1-(Perfluorobut-1-yn-1-yl)naphthalene (4q)

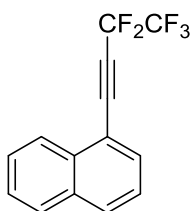

Quenched with 3.0 M HCl, eluted with petroleum ether to give **4q** (92 mg, 76% yield).

Colorless oil.  $^1\text{H}$  NMR (CDCl<sub>3</sub>, 400 MHz)  $\delta$  8.19 (d,  $J = 8.4$  Hz, 1H), 7.99 (d,  $J = 8.4$  Hz, 1H), 7.91 (d,  $J = 8.0$  Hz, 1H), 7.84 (d,  $J = 6.8$  Hz, 1H), 7.66 (t,  $J = 8.0$  Hz, 1H), 7.59 (t,  $J = 8.0$  Hz, 1H), 7.49 (t,  $J = 8.0$  Hz, 1H);

$^{19}\text{F}$  NMR (CDCl<sub>3</sub>, 376 MHz)  $\delta$  -85.6 (t,  $J = 4.5$  Hz, 3F), -101.4 (q,  $J = 4.5$  Hz, 2F);

$^{13}\text{C}$  NMR (CDCl<sub>3</sub>, 100 MHz)  $\delta$  133.3 (t,  $J = 1.4$  Hz), 133.1, 132.8 (t,  $J = 2.7$  Hz), 131.9, 128.8, 128.1, 127.2, 125.3, 125.1, 118.3 (qt,  $J = 283.7, 37.2$  Hz), 116.1 (t,  $J = 2.9$  Hz), 106.0 (tq,  $J = 243.2, 41.9$  Hz), 90.3 (t,  $J = 6.6$  Hz), 79.2 (t,  $J = 36.3$  Hz);

MS (EI,  $m/z$ , %): 270 ( $M^+$ , 76.9), 201 (100.00);

HRMS (EI): Calcd. For C<sub>14</sub>H<sub>7</sub>F<sub>5</sub>: 270.0462; Found: 270.0466;

IR (film): 3062, 2238, 1585, 1512, 1400, 1350, 1292, 1218, 1192, 1165, 1155, 1112, 1054, 1022, 1006, 912, 877, 804, 771, 715, 659 cm<sup>-1</sup>.

#### 4-(Perfluorobut-1-yn-1-yl)dibenzo[*b,d*]thiophene (4r)

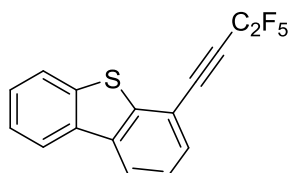

Quenched with 3.0 M HCl, eluted with petroleum ether to give **4r** (105 mg, 72% yield).

Yellow solid. Mp: 44–46 °C.  $^1\text{H}$  NMR (CDCl<sub>3</sub>, 400 MHz)  $\delta$  8.13 (d,  $J = 8.0$  Hz, 1H), 8.07 (d,  $J = 8.4$  Hz, 1H), 7.84 (d,  $J = 7.2$  Hz, 1H), 7.63 (d,  $J = 7.6$  Hz, 1H), 7.54–7.44

(m, 2H), 7.41 (t,  $J = 7.6$  Hz, 1H);

$^{19}\text{F}$  NMR (CDCl<sub>3</sub>, 376 MHz)  $\delta$  -85.5 (t,  $J = 4.1$  Hz, 3F), -101.9 (q,  $J = 4.1$  Hz, 2F);

$^{13}\text{C}$  NMR (CDCl<sub>3</sub>, 100 MHz)  $\delta$  143.6 (t,  $J = 2.3$  Hz), 139.3, 136.1, 135.1, 131.0 (t,  $J = 2.5$  Hz), 127.6, 124.9, 124.5, 124.0, 123.0, 122.0, 118.2 (qt,  $J = 284.0, 37.0$  Hz), 113.0 (t,  $J = 3.0$  Hz), 105.9 (tq,  $J = 243.7, 42.1$  Hz), 89.1 (t,  $J = 6.4$  Hz), 79.3 (t,  $J = 36.4$  Hz);

MS (EI,  $m/z$ , %): 326 ( $\text{M}^+$ , 66.65), 40 (100.00);

HRMS (EI): Calcd. For C<sub>16</sub>H<sub>7</sub>F<sub>5</sub>S: 326.0183; Found: 326.0193;

IR (film): 3074, 2246, 1482, 1388, 1323, 1286, 1218, 1188, 1163, 1114, 1093, 1058, 1033, 1019, 888, 796, 749, 682 cm<sup>-1</sup>.

### 5-(Perfluorobut-1-yn-1-yl)-1H-indole (4s)

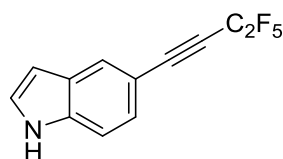

Quenched with 3.0 M HCl, eluted with petroleum ether/ethyl acetate to give **4s** (79 mg, 68% yield).

Yellow solid. Mp: 55–57 °C.  $^1\text{H}$  NMR (CDCl<sub>3</sub>, 400 MHz)  $\delta$  8.28 (br, 1H), 7.94 (s, 1H), 7.42–7.34 (m, 2H), 7.28 (t,  $J = 2.8$  Hz, 1H), 6.61 (t,  $J = 2.4$  Hz, 1H);

$^{19}\text{F}$  NMR (CDCl<sub>3</sub>, 376 MHz)  $\delta$  -85.7 (t,  $J = 4.5$  Hz, 3F), -100.6 (q,  $J = 4.5$  Hz, 2F);

$^{13}\text{C}$  NMR (CDCl<sub>3</sub>, 100 MHz)  $\delta$  136.9, 127.8, 126.6 (t,  $J = 2.6$  Hz), 126.99, 125.96 (t,  $J = 2.2$  Hz), 118.3 (qt,  $J = 283.7, 37.7$  Hz), 111.6, 109.5 (t,  $J = 2.8$  Hz), 106.1 (tq,  $J = 242.1, 41.6$  Hz), 103.4, 94.1 (t,  $J = 6.3$  Hz), 72.8 (t,  $J = 36.1$  Hz);

MS (EI,  $m/z$ , %): 259 ( $\text{M}^+$ , 72.76), 190 (100.00);

HRMS (EI): Calcd. For C<sub>12</sub>H<sub>6</sub>NF<sub>5</sub>: 259.0415; Found: 259.0422;

IR (film): 3489, 3432, 2237, 1618, 1472, 1415, 1346, 1299, 1259, 1216, 1194, 1138, 1116, 1034, 935, 890, 807, 764, 733, 664, 599 cm<sup>-1</sup>.

### 2-(Perfluorobut-1-yn-1-yl)benzofuran (4t)

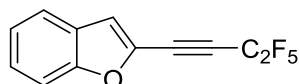

Quenched with 3.0 M HCl, eluted with petroleum ether to give **4t** (70 mg, 60% yield).

Red oil.  $^1\text{H}$  NMR (CDCl<sub>3</sub>, 400 MHz)  $\delta$  7.63 (d,  $J = 8.0$  Hz, 1H), 7.51 (dd,  $J = 8.4, 0.8$  Hz, 1H), 7.45 (td,  $J = 7.2, 1.2$  Hz, 1H), 7.34–7.31 (m, 1H), 7.30–7.28 (m, 1H);

$^{19}\text{F}$  NMR (CDCl<sub>3</sub>, 376 MHz)  $\delta$  -85.4 (t,  $J = 4.1$  Hz, 3F), -102.8 (q,  $J = 4.1$  Hz, 2F);

$^{13}\text{C}$  NMR (CDCl<sub>3</sub>, 100 MHz)  $\delta$  155.8, 134.6 (t,  $J = 3.2$  Hz), 127.6, 126.6, 124.2, 122.2, 118.0 (qt,  $J = 284.0, 36.6$  Hz), 116.9 (t,  $J = 2.3$  Hz), 111.9, 105.7 (tq,  $J = 244.9, 42.2$  Hz), 81.9 (t,  $J = 6.3$  Hz), 80.3 (t,  $J = 36.7$  Hz);

MS (EI,  $m/z$ , %): 260 ( $\text{M}^+$ , 97.31), 191 (100.00);

HRMS (EI): Calcd. For C<sub>12</sub>H<sub>5</sub>OF<sub>5</sub>: 260.0255; Found: 260.0263;

**IR (film):** 3074, 2244, 1448, 1290, 1214, 1149, 1123, 1041, 949, 825, 749, 741, 699  $\text{cm}^{-1}$ .

### 3-(Perfluorobut-1-yn-1-yl)quinoline (4u)

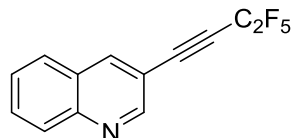

Quenched with ammonium hydroxide, eluted with petroleum ether/ethyl acetate to give **4u** (57 mg, 48% yield).

White solid. Mp: 99–100 °C.  $^1\text{H NMR}$  ( $\text{CDCl}_3$ , 400 MHz)  $\delta$  8.95 (s, 1H), 8.40 (s, 1H), 8.12 (d,  $J = 8.4$  Hz, 1H), 7.80 (t,  $J = 7.6$  Hz, 2H), 7.62 (t,  $J = 7.6$  Hz, 1H);

$^{19}\text{F NMR}$  ( $\text{CDCl}_3$ , 376 MHz)  $\delta$  -85.5 (t,  $J = 4.5$  Hz, 3F), -102.0 (q,  $J = 4.1$  Hz, 2F);

$^{13}\text{C NMR}$  ( $\text{CDCl}_3$ , 100 MHz)  $\delta$  151.2 (t,  $J = 2.0$  Hz), 148.1, 141.1 (t,  $J = 2.6$  Hz), 131.9, 129.8, 128.1, 128.0, 126.6, 118.1 (qt,  $J = 284.0, 36.9$  Hz), 112.7 (t,  $J = 3.0$  Hz), 105.6 (tq,  $J = 244.2, 42.1$  Hz), 88.8 (t,  $J = 6.2$  Hz), 77.5 (t,  $J = 36.5$  Hz);

**MS (EI,  $m/z$ , %):** 271 ( $\text{M}^+$ , 76.01), 202 (100.00);

**HRMS (EI):** Calcd. For  $\text{C}_{13}\text{H}_6\text{NF}_5$ : 271.0415; Found: 271.0413;

**IR (film):** 3048, 2239, 1621, 1569, 1491, 1356, 1333, 1287, 1209, 1150, 1113, 1039, 976, 914, 787, 753, 715, 499  $\text{cm}^{-1}$ .

### (E)-(5,5,6,6,6-pentafluorohex-1-en-3-yn-1-yl)benzene (4v)

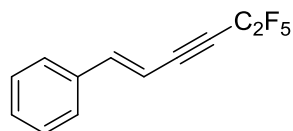

Quenched with 3.0 M HCl, eluted with pentane to give **4v** (83 mg, 75% yield).

Yellow oil.  $^1\text{H NMR}$  ( $\text{CDCl}_3$ , 400 MHz)  $\delta$  7.45–7.36 (m, 5H), 7.25 (d,  $J = 16.4$  Hz, 1H), 6.18 (td,  $J = 16.4, 4.4$  Hz, 1H);

$^{19}\text{F NMR}$  ( $\text{CDCl}_3$ , 376 MHz)  $\delta$  -85.7 (t,  $J = 4.5$  Hz, 3F), -101.2 (m, 2F);

$^{13}\text{C NMR}$  ( $\text{CDCl}_3$ , 100 MHz)  $\delta$  147.9 (t,  $J = 3.6$  Hz), 134.9, 130.4, 129.1, 127.1, 118.2 (qt,  $J = 283.7, 37.5$  Hz), 105.8 (tq,  $J = 242.5, 41.9$  Hz), 103.6 (t,  $J = 3.6$  Hz), 91.1 (t,  $J = 6.6$  Hz), 76.0 (t,  $J = 36.0$  Hz);

**MS (EI,  $m/z$ , %):** 246 ( $\text{M}^+$ , 33.54), 177 (100.00);

**HRMS (EI):** Calcd. For  $\text{C}_{12}\text{H}_7\text{F}_5$ : 246.0462; Found: 246.0475;

**IR (film):** 3074, 3035, 2227, 1610, 1556, 1493, 1449, 1331, 1277, 1215, 1114, 1083, 1010, 981, 748, 698, 689  $\text{cm}^{-1}$ .

### 1,1,1,2,2-Pentafluorohexadec-3-yne (4w)

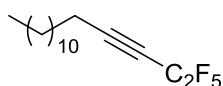

Quenched with 3.0 M HCl, eluted with pentane to give **4w** (110 mg, 79% yield).  
 Colorless oil.  $^1\text{H NMR}$  ( $\text{CDCl}_3$ , 400 MHz)  $\delta$  2.39–2.29 (m, 2H), 1.63–1.55 (m, 2H), 1.44–1.35 (m, 2H), 1.34–1.20 (m, 16H), 0.88 (t,  $J = 6.8$  Hz, 3H);  
 $^{19}\text{F NMR}$  ( $\text{CDCl}_3$ , 376 MHz)  $\delta$  –86.1 (t,  $J = 4.1$  Hz, 3F), –100.9 (m, 2F);  
 $^{13}\text{C NMR}$  ( $\text{CDCl}_3$ , 100 MHz)  $\delta$  118.2 (qt,  $J = 283.3$ , 37.4 Hz), 105.2 (tq,  $J = 241.9$ , 41.8 Hz), 94.6 (t,  $J = 6.0$  Hz), 67.5 (t,  $J = 35.8$  Hz), 32.2, 29.9 (2 carbon), 29.8, 29.64, 29.61, 29.2, 28.9, 27.5 (t,  $J = 2.1$  Hz), 22.9, 18.6 (t,  $J = 2.7$  Hz), 14.2;  
**MS (EI,  $m/z$ , %)**: 57 (100), 55 (58.96);  
**HRMS (EI)**: Calcd. For  $\text{C}_{16}\text{H}_{25}\text{F}_5$ : 312.1871; Found: 312.1877;  
**IR (film)**: 2928, 2857, 2256, 1467, 1350, 1321, 1253, 1214, 1113, 1074, 942, 756, 662  $\text{cm}^{-1}$ .

#### 2-(7,7,8,8,8-Pentafluorooct-5-yn-1-yl)isoindoline-1,3-dione (**4x**)

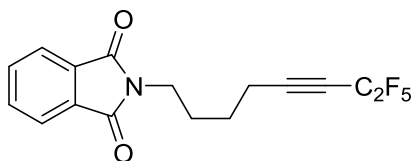

Quenched with 3.0 M HCl, eluted with petroleum ether/ethyl acetate to give **4x** (133 mg, 86% yield).  
 White solid. Mp: 84–85 °C.  $^1\text{H NMR}$  ( $\text{CDCl}_3$ , 400 MHz)  $\delta$  7.89–7.82 (m, 2H), 7.77–7.68 (m, 2H), 3.72 (t,  $J = 6.8$  Hz, 2H), 2.48–2.37 (m, 2H), 1.88–1.75 (m, 2H), 1.71–1.60 (m, 2H);  
 $^{19}\text{F NMR}$  ( $\text{CDCl}_3$ , 376 MHz)  $\delta$  –86.0 (t,  $J = 4.1$  Hz, 3F), –101.1 (m, 2F);  
 $^{13}\text{C NMR}$  ( $\text{CDCl}_3$ , 100 MHz)  $\delta$  168.4, 134.0, 132.1, 123.3, 117.9 (qt,  $J = 283.7$ , 37.6 Hz), 105.0 (tq,  $J = 242.1$ , 41.7 Hz), 93.6 (t,  $J = 6.0$  Hz), 67.7 (t,  $J = 35.9$  Hz), 37.1, 27.7, 24.6 (t,  $J = 2.2$  Hz), 18.0 (t,  $J = 2.6$  Hz);  
**MS (EI,  $m/z$ , %)**: 345 ( $\text{M}^+$ , 11.52), 160 (100.00);  
**HRMS (EI)**: Calcd. For  $\text{C}_{16}\text{H}_{12}\text{O}_2\text{F}_5$ : 345.0783; Found: 345.0778.  
**IR (film)**: 2933, 2868, 2259, 1778, 1703, 1616, 1467, 1403, 1366, 1331, 1255, 1207, 1102, 1069, 1038, 1026, 1000, 915, 745, 719, 530  $\text{cm}^{-1}$ .

#### 4,4,5,5,5-Pentafluoro-1,1-diphenylpent-2-yn-1-ol (**4y**)

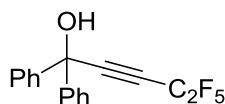

Quenched with 3.0 M HCl, eluted with petroleum ether/ethyl acetate to give **4y** (73 mg, 50% yield).  
 Yellow oil.  $^1\text{H NMR}$  ( $\text{CDCl}_3$ , 400 MHz)  $\delta$  7.53 (d,  $J = 7.6$  Hz, 4H), 7.41–7.30 (m, 6H), 2.92 (br, 1H);  
 $^{19}\text{F NMR}$  ( $\text{CDCl}_3$ , 376 MHz)  $\delta$  –85.6 (t,  $J = 4.1$  Hz, 3F), –102.8 (q, 2F);  
 $^{13}\text{C NMR}$  ( $\text{CDCl}_3$ , 100 MHz)  $\delta$  142.6, 128.8, 128.7, 126.0, 118.0 (qt,  $J = 283.8$ , 36.8

Hz), 105.3 (tq,  $J = 244.5, 42.1$  Hz), 94.5 (t,  $J = 6.3$  Hz), 74.6, 73.1 (t,  $J = 36.6$  Hz);  
**MS (EI,  $m/z$ , %):** 326 ( $M^+$ , 13.28), 207 (100.00);  
**HRMS (EI):** Calcd. For  $C_{17}H_{11}OF_5$ : 326.0725; Found: 326.0734;  
**IR (film):** 3536, 3442, 3045, 2253, 1601, 1492, 1451, 1336, 1215, 1120, 1070, 1029, 983, 890, 764, 714, 697  $cm^{-1}$ .

#### 4,4,5,5,5-Pentafluoropent-2-yn-1-yl benzoate (**4z**)

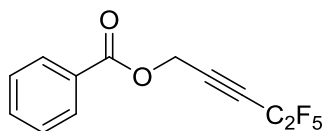

Quenched with 3.0 M HCl, eluted with pentane/dichloromethane to give **4z** (88 mg, 71% yield).

Yellow oil.  $^1H$  NMR ( $CDCl_3$ , 400 MHz)  $\delta$  8.11–8.04 (m, 2H), 7.62 (tt,  $J = 6.8, 1.2$  Hz, 1H), 7.52–7.45 (m, 2H), 5.06 (t,  $J = 4.4$  Hz, 2H);

$^{19}F$  NMR ( $CDCl_3$ , 376 MHz)  $\delta$  –85.8 (t,  $J = 3.8$  Hz, 3F), –103.1 (m, 2F);

$^{13}C$  NMR ( $CDCl_3$ , 100 MHz)  $\delta$  165.5, 133.9, 130.1, 128.8, 128.7, 117.8 (qt,  $J = 283.7, 36.5$  Hz), 104.8 (tq,  $J = 244.4, 42.2$  Hz), 86.4 (t,  $J = 6.3$  Hz), 72.5 (t,  $J = 36.2$  Hz), 51.4;

**MS (EI,  $m/z$ , %):** 278 ( $M^+$ , 19.21), 105 (100.00);

**HRMS (EI):** Calcd. For  $C_{12}H_7O_2F_5$ : 278.0361; Found: 278.0372;

**IR (film):** 3078, 2931, 2853, 2266, 1735, 1603, 1453, 1372, 1342, 1317, 1269, 1247, 1216, 1178, 1122, 1095, 1077, 1028, 984, 937, 758, 710, 662  $cm^{-1}$ .

#### *N*-(3-chloro-4-((3-fluorobenzyl)oxy)phenyl)-6-(perfluorobut-1-yn-1-yl)quinazolin-4-amine (**4aa**)

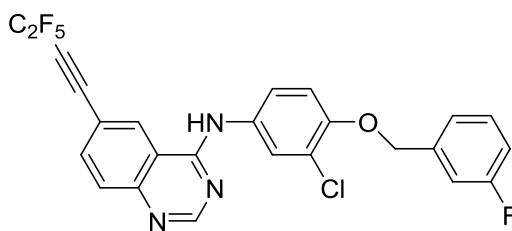

Quenched with ammonium hydroxide, eluted with petroleum ether/ethyl acetate to give **4aa** (167 mg, 71% yield).

Yellow solid. Mp: 140–141 °C.  $^1H$  NMR ( $DMSO-d_6$ , 400 MHz)  $\delta$  9.82 (s, 1H), 8.80 (s, 1H), 8.56 (s, 1H), 7.98 (d,  $J = 2.4$  Hz, 1H), 7.85 (d,  $J = 8.8$  Hz, 1H), 7.68 (d,  $J = 8.8$  Hz, 2H), 7.41 (q,  $J = 8.0$  Hz, 1H), 7.32–7.22 (m, 2H), 7.19–7.07 (m, 2H), 5.17 (s, 2H);

$^{19}F$  NMR ( $CDCl_3$ , 376 MHz)  $\delta$  –85.5 (t,  $J = 4.5$  Hz, 3F), –101.9 (q,  $J = 4.1$  Hz, 2F), –113.0 (m, 1F);

$^{13}C$  NMR ( $DMSO-d_6$ , 100 MHz)  $\delta$  162.2 (d,  $J = 242.3$  Hz), 157.0, 156.4, 150.9,

149.9, 139.6 (d,  $J = 7.5$  Hz), 134.7, 132.7, 130.4 (d,  $J = 8.2$  Hz), 129.2, 128.7, 123.9, 123.1, 121.9, 121.1, 117.6 (qt,  $J = 283.9, 37.4$  Hz), 114.8, 114.6 (d,  $J = 20.8$  Hz), 114.0 (2 carbon), 113.8 (d,  $J = 6.6$  Hz), 105.3 (tq,  $J = 242.6, 41.7$  Hz), 92.2 (t,  $J = 6.3$  Hz), 73.5 (t,  $J = 36.0$  Hz), 69.4;

**MS (ESI,  $m/z$ ):** 521.9 ( $M+H^+$ );

**HRMS (ESI):** Calcd. For  $C_{25}H_{15}ON_3ClF_6$ : 522.0802 ( $M+H^+$ ); Found: 522.0801;

**IR (film):** 3300, 3080, 2924, 2250, 1588, 1568, 1530, 1499, 1421, 1361, 1279, 1216, 1150, 1121, 1041, 918, 843, 782, 728  $cm^{-1}$ .

**(S)-3-(4-(2-chloro-5-(perfluorobut-1-yn-1-yl)benzyl)phenoxy)tetrahydrofuran (4ab)**

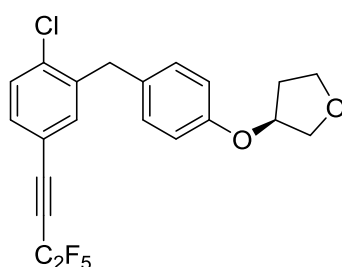

Quenched with ammonium hydroxide, eluted with petroleum ether/ethyl acetate to give **4ab** (127 mg, 67% yield).

Yellow oil.  $[\alpha]_D = 4.35$  ( $CHCl_3$ ,  $c = 0.9050$  w/v%).  $^1H$  NMR ( $CDCl_3$ , 400 MHz)  $\delta$  7.44–7.30 (m, 3H), 7.09 (d,  $J = 8.4$  Hz, 2H), 6.81 (d,  $J = 8.4$  Hz, 2H), 4.94–4.86 (m, 1H), 4.06–3.85 (m, 6H), 2.26–2.09 (m, 2H);

$^{19}F$  NMR ( $CDCl_3$ , 376 MHz)  $\delta$  -85.6 (t,  $J = 4.1$  Hz, 3F), -101.7 (q,  $J = 4.5$  Hz, 2F);

$^{13}C$  NMR ( $CDCl_3$ , 100 MHz)  $\delta$  156.3, 140.2, 137.6, 134.7 (t,  $J = 2.4$  Hz), 131.6 (t,  $J = 2.5$  Hz), 130.7, 130.2, 130.1, 118.0 (qt,  $J = 283.9, 37.2$  Hz), 117.2 (t,  $J = 3.0$  Hz), 115.7, 105.6 (tq,  $J = 243.5, 41.9$  Hz), 90.5 (t,  $J = 6.3$  Hz), 77.5, 75.3 (t,  $J = 36.2$  Hz), 73.2, 67.3, 38.2, 33.1;

**MS (EI,  $m/z$ , %):** 430 ( $M^+$ , 62.57), 71 (100.00);

**HRMS (EI):** Calcd. For  $C_{21}H_{16}O_2F_5Cl$ : 430.0753; Found: 430.0761;

**IR (film):** 2952, 2870, 2244, 1614, 1582, 1509, 1299, 1217, 1186, 1143, 1114, 1050, 1038, 823, 677  $cm^{-1}$ .

**(8R,9S,13S,14S,17S)-13-methyl-17-(perfluorobut-1-yn-1-yl)-7,8,9,11,12,13,14,15,16,17-decahydro-6H-cyclopenta[*a*]phenanthrene-3,17-diol (4ac)**

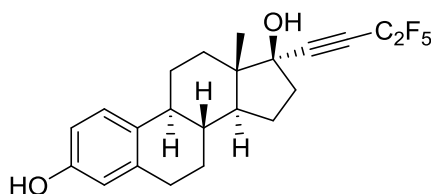

Quenched with 3.0 M HCl, eluted with petroleum ether/ethyl acetate to give **4ac** (125 mg, 67% yield).

White solid. Mp: 77–80 °C.  $[\alpha]_D = -9.82$  (CHCl<sub>3</sub>, c = 0.66 w/v%). <sup>1</sup>H NMR (DMSO-*d*<sub>6</sub>, 400 MHz)  $\delta$  9.01 (s, 1H), 7.03 (d, *J* = 8.4 Hz, 1H), 6.52 (dd, *J* = 8.4, 2.0 Hz, 1H), 6.44 (d, *J* = 2.0 Hz, 1H), 6.10 (s, 1H), 2.90–2.60 (m, 2H), 2.29 (d, *J* = 10.8 Hz, 1H), 2.25–2.13 (m, 1H), 2.05–1.90 (m, 2H), 1.84–1.54 (m, 4H), 1.52–1.13 (m, 5H), 0.79 (s, 3H);

<sup>19</sup>F NMR (CDCl<sub>3</sub>, 376 MHz)  $\delta$  -85.8 (t, *J* = 4.1 Hz, 3F), -102.2 (m, 2F);

<sup>13</sup>C NMR (DMSO-*d*<sub>6</sub>, 100 MHz)  $\delta$  155.1, 137.1, 129.8, 126.1, 117.6 (qt, *J* = 283.8, 37.7 Hz), 115.0, 112.8, 105.0 (tq, *J* = 241.5, 41.5 Hz), 99.9 (t, *J* = 6.7 Hz), 78.5 (m, 2 carbon), 69.5 (t, *J* = 35.7 Hz), 49.8, 47.5, 43.5, 38.3, 32.7, 29.1, 27.1, 26.0, 22.5, 12.5;

MS (ESI, *m/z*): 415.1 (M+H<sup>+</sup>);

HRMS (ESI): Calcd. For C<sub>22</sub>H<sub>24</sub>O<sub>2</sub>F<sub>5</sub> (M+H<sup>+</sup>): 415.1691; Found: 415.1691;

IR (film): 3379, 2933, 2872, 2246, 1610, 1582, 1499, 1448, 1342, 1286, 1209, 1116, 1070, 1049, 872, 675 cm<sup>-1</sup>.

**(8*R*,9*S*,10*R*,13*S*,14*S*,17*S*)-17-hydroxy-13-methyl-17-(perfluorobut-1-yn-1-yl)-1,2,6,7,8,9,10,11,12,13,14,15,16,17-tetradecahydro-3*H*-cyclopenta[*a*]phenanthren-3-one (4ad)**

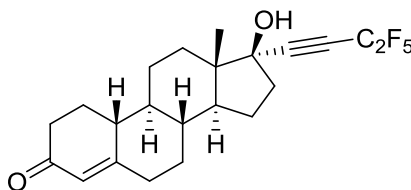

Quenched with 3.0 M HCl, eluted with petroleum ether/ethyl acetate to give **4ad** (159 mg, 76% yield).

White solid. Mp: 153–154 °C.  $[\alpha]_D = 2.36$  (CHCl<sub>3</sub>, c = 0.93 w/v%). <sup>1</sup>H NMR (CDCl<sub>3</sub>, 400 MHz)  $\delta$  5.83 (s, 1H), 3.48 (s, 1H), 2.52–2.19 (m, 6H), 2.14–1.98 (m, 2H), 1.91 (dd, *J* = 13.6, 2.4 Hz, 1H), 1.86–1.78 (m, 1H), 1.72 (d, *J* = 12.0 Hz, 2H), 1.61–1.48 (m, 2H), 1.45–1.20 (m, 4H), 1.15–1.00 (m, 1H), 0.92 (s, 3H), 0.88–0.75 (m, 1H);

<sup>19</sup>F NMR (CDCl<sub>3</sub>, 376 MHz)  $\delta$  -85.8 (t, *J* = 4.1 Hz, 3F), -102.2 (m, 2F);

<sup>13</sup>C NMR (CDCl<sub>3</sub>, 100 MHz)  $\delta$  200.4, 166.8, 124.7, 117.9 (qt, *J* = 283.8, 37.1 Hz), 105.2 (tq, *J* = 243.3, 41.9 Hz), 96.5 (t, *J* = 6.5 Hz), 79.6, 72.1 (t, *J* = 36.3 Hz), 49.8, 49.2, 47.7, 42.6, 41.0, 38.6, 36.5, 35.4, 32.6, 30.7, 26.6, 26.2, 23.1, 12.7;

MS (ESI, *m/z*): 417.1 (M+H<sup>+</sup>);

HRMS (ESI): Calcd. For C<sub>22</sub>H<sub>26</sub>O<sub>2</sub>F<sub>5</sub> (M+H<sup>+</sup>): 417.1847; Found: 417.1847;

IR (film): 3389, 2935, 2870, 2244, 1661, 1620, 1454, 1337, 1255, 1207, 1111, 1073, 1056, 1037, 970, 890, 671 cm<sup>-1</sup>.

## 5. Procedures for Scale-up Syntheses



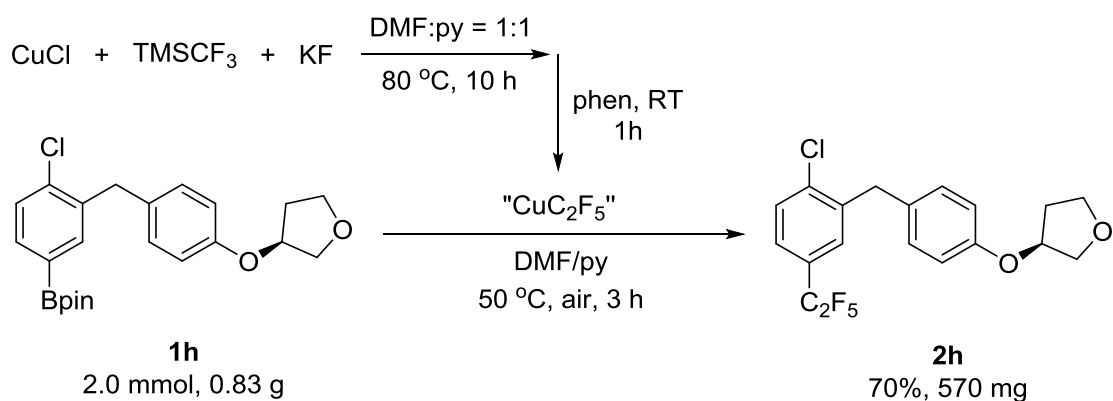

To an oven-dried sealed tube were added CuCl (22.5 mmol, 2.23 g, 11.2 equiv) and KF (15.0 mmol, 0.87 g, 7.5 equiv) in glove box. Then in fume hood, DMF (30 mL),  $\text{TMSCF}_3$  (15.0 mmol, 2.2 mL, 7.5 equiv) and pyridine (30 mL) were successively added under  $\text{N}_2$  atmosphere. After stirred at room temperature for 5 minutes, the reaction mixture was immersed into 80 °C oil bath and stirred for 10 h. Then the reaction mixture was cooled to room temperature and filtrated in the glove box. The filtrate was added in to the sealed tube containing phen (8.0 mmol, 1.44 g, 4.0 equiv). Then the reaction mixture was stirred at room temperature for 1 h. Under  $\text{N}_2$  atmosphere, to a Schlenk flask was added **1h** (2.0 mmol, 0.83 g, 1.0 equiv), AgF (8.0 mmol, 1.01 g, 4.0 equiv) and the “ $\text{CuCF}_2\text{CF}_3$ ” solution prepared above. After that, the reaction mixture was stirred 50 °C under air for 3 h. When the reaction was completed, the reaction mixture was quenched with 50 mL 3.0 M HCl solution or 20 mL ammonium hydroxide, extracted with  $\text{CH}_2\text{Cl}_2$  (30 mL $\times$ 3). The combined organic layer was washed with  $\text{H}_2\text{O}$  (30 mL $\times$ 2) and brine (40 mL), dried over  $\text{Na}_2\text{SO}_4$ , concentrated under vacuum. The residue was purified by column chromatography on silica gel to afford **2h** as yellow oil in 70% yield (570 mg).

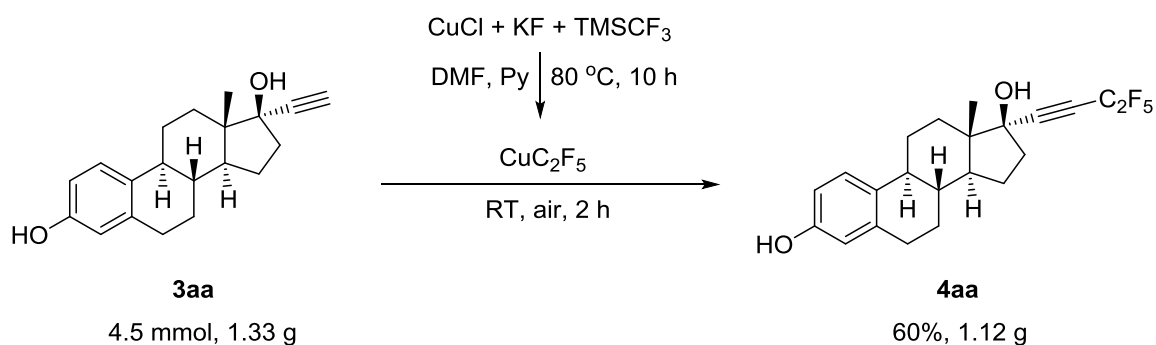

To a 100 mL oven-dried sealed tube were added CuCl (22.5 mmol, 2.23 g, 5.0 equiv) and KF (15 mmol, 873 mg, 3.3 equiv) in glove box. Then in fume hood, DMF (30 mL), TMSCF<sub>3</sub> (15 mmol, 2.2 mL, 3.3 equiv) and pyridine (30 mL) were successively added under N<sub>2</sub> atmosphere. After being stirred at room temperature for 5 minutes, the reaction mixture was immersed into 80 °C oil bath and stirred for 10 hours. Then the reaction mixture was cooled to room temperature and bubbled with air until the mixture turned black. After that, **3aa** (4.5 mmol, 1.33 g, 1.0 equiv) dissolved in DMF (15 mL) was added slowly to the mixture using a syringe pump for about 15 minutes. The reaction mixture was further stirred under air at room temperature for 2 hours (air was bubbled into the mixture all the time since the mixture was first exposed to air). After the reaction was completed, the reaction mixture was quenched with 200 mL 3.0 M HCl, extracted with CH<sub>2</sub>Cl<sub>2</sub> (80 mL × 3). The combined organic layer was washed with H<sub>2</sub>O (100 mL × 2) and brine (100 mL), dried over MgSO<sub>4</sub>, then concentrated under vacuum. The residue was purified by column chromatography on silica gel with petroleum ether/ethyl acetate as eluent to afford **4aa** as a yellow solid in 60% yield (1.12 g).

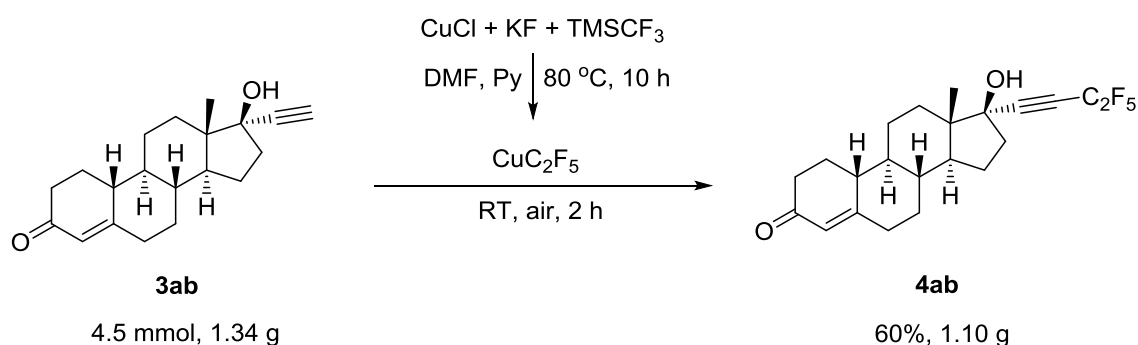

To a 100 mL oven-dried sealed tube were added CuCl (22.5 mmol, 2.23 g, 5.0 equiv) and KF (15 mmol, 872 mg, 3.3 equiv) in glove box. Then in fume hood, DMF (30 mL), TMSCF<sub>3</sub> (15 mmol, 2.2 mL, 3.3 equiv) and pyridine (30 mL) were successively added under N<sub>2</sub> atmosphere. After being stirred at room temperature for 5 minutes, the reaction mixture was immersed into 80 °C oil bath and stirred for 10 hours. Then the reaction mixture was cooled to room temperature and bubbled with air until the

mixture turned black. After that, **3ab** (4.5 mmol, 1.34 g, 1.0 equiv) dissolved in DMF (15 mL) was added slowly to the mixture using a syringe pump for about 15 minutes. The reaction mixture was further stirred under air at room temperature for 2 hours (air was bubbled into the mixture all the time since the mixture was first exposed to air). After the reaction was completed, the reaction mixture was quenched with 200 mL 3.0 M HCl, extracted with CH<sub>2</sub>Cl<sub>2</sub> (80 mL × 3). The combined organic layer was washed with H<sub>2</sub>O (100 mL × 2) and brine (100 mL), dried over MgSO<sub>4</sub>, then concentrated under vacuum. The residue was purified by column chromatography on silica gel with petroleum ether/ethyl acetate as eluent to afford **4ab** as a yellow solid in 60% yield (1.10 g).

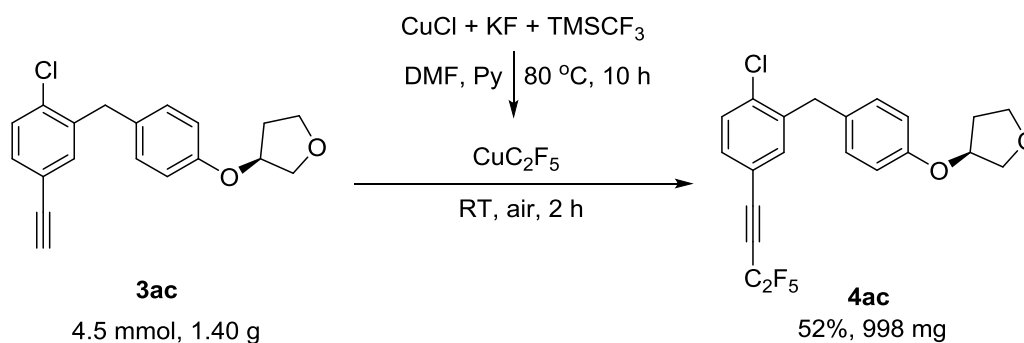

To a 100 mL oven-dried sealed tube were added CuCl (22.5 mmol, 2.23 g, 5.0 equiv) and KF (15 mmol, 872 mg, 3.3 equiv) in glove box. Then in fume hood, DMF (30 mL), TMSCF<sub>3</sub> (15 mmol, 2.2 mL, 3.3 equiv) and pyridine (30 mL) were successively added under N<sub>2</sub> atmosphere. After being stirred at room temperature for 5 minutes, the reaction mixture was immersed into 80 °C oil bath and stirred for 10 hours. Then the reaction mixture was cooled to room temperature and bubbled with air until the mixture turned black. After that, **3ac** (4.5 mmol, 1.34 g, 1.0 equiv) dissolved in DMF (15 mL) was added slowly to the mixture using a syringe pump for about 15 minutes. The reaction mixture was further stirred under air at room temperature for 2 h (air was bubbled into the mixture all the time since the mixture was first exposed to air). After the reaction was completed, the reaction mixture was quenched with 200 mL 3.0 M HCl, extracted with CH<sub>2</sub>Cl<sub>2</sub> (80 mL × 3). The combined organic layer was washed with H<sub>2</sub>O (100 mL × 2) and brine (100 mL), dried over MgSO<sub>4</sub>, then concentrated

under vacuum. The residue was purified by column chromatography on silica gel with petroleum ether/ethyl acetate as eluent to afford **4ac** as a yellow solid in 52% yield (998 mg).

## 6. References

- [1] J. Ratniyom, N. Dechnarong, S. Yotphan, S. Kiatisevi, *Eur. J. Org. Chem.* **2014**, 1381–1385.
- [2] X. Yang, P. Pei, J. Zhang, T. Yang, Q. Chen, CN 110698467A, **2020**.
- [3] Q. Xie, L. Li, Z. Zhu, R. Zhang, C. Ni, J. Hu, *Angew. Chem. Int. Ed.* **2018**, *57*, 13211–13215.
- [4] C. P. Decicco, Y. Song, D. A. Evans, *Org. Lett.* **2001**, *3*, 1029–1032.
- [5] C. Feng, H. Wang, L. Xu, P. Li, *Org. Biomol. Chem.* **2015**, *13*, 7136 – 7139.
- [6] N. N. H. Ton, B. K. Mai, T. V. Nguyen, *J. Org. Chem.* **2021**, *86*, 9117–9133.
- [7] C. Xu, W. Du, Y. Zeng, B. Dai, H. Guo, *Org. Lett.* **2014**, *16*, 948 – 951.
- [8] N. Chang, H. Mori, X. Chen, Y. Okuda, T. Okamoto, Y. Nishihara, *Chem. Lett.* **2013**, *42*, 1257 – 1259.
- [9] Y. Yasu, T. Koike, M. Akita, *Chem. Commun.* **2013**, *49*, 2037 – 2039.
- [10] G. L. Tolnai, A. Székely, Z. Makó, T. Gái, J. Daru, T. Bihari, A. Stirling, Z. Novák, *Chem. Commun.* **2015**, *51*, 4488 – 4491.
- [11] A. Ikeda, M. Omote, K. Kusumoto, A. Tarui, K. Sato, A. Akira, *Org. Biomol. Chem.* **2015**, *13*, 8886 – 8892.
- [12] A. Ikeda, M. Omote, K. Kusumoto, A. Tarui, K. Sato, A. Ando, *Org. Biomol. Chem.* **2016**, *14*, 2127 – 2133.
- [13] A. Morri, Y. Thummala, V. Doddi, *Org. Lett.* **2015**, *17*, 4640 – 4643.
- [14] B. Xing, L. Li, C. Ni, J. Hu, *Chin. J. Chem.* **2019**, *37*, 1131 – 1136.
- [15] J. Zhu, Y. Li, C. Ni, Q. Shen, *Chin. J. Chem.* **2016**, *34*, 662 – 668.
- [16] H. Serizawa, K. Aikawa, K. Mikami, *Org. Lett.* **2014**, *16*, 3456 – 3459.
- [17] R. Tahara, T. Fukuhara, S. Hara, *J. Fluorine Chem.* **2011**, *132*, 579–586.

## 7. $^1\text{H}$ , $^{19}\text{F}$ , $^{13}\text{C}$ NMR Spectra of New Compounds

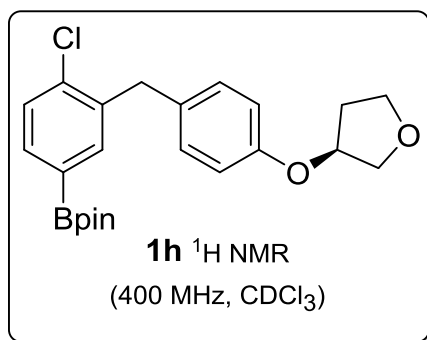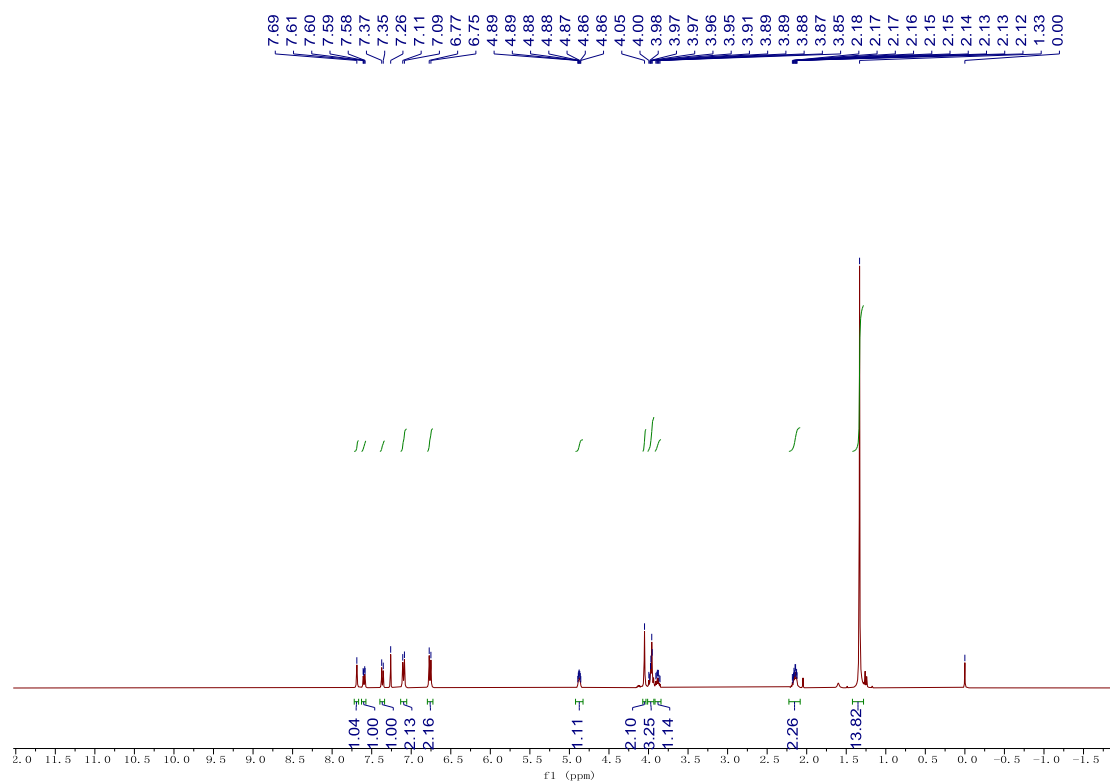

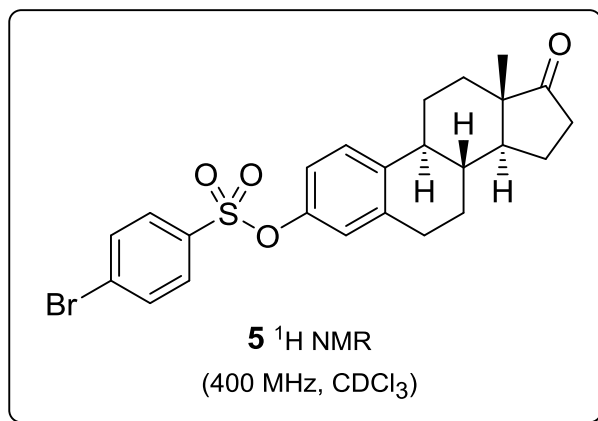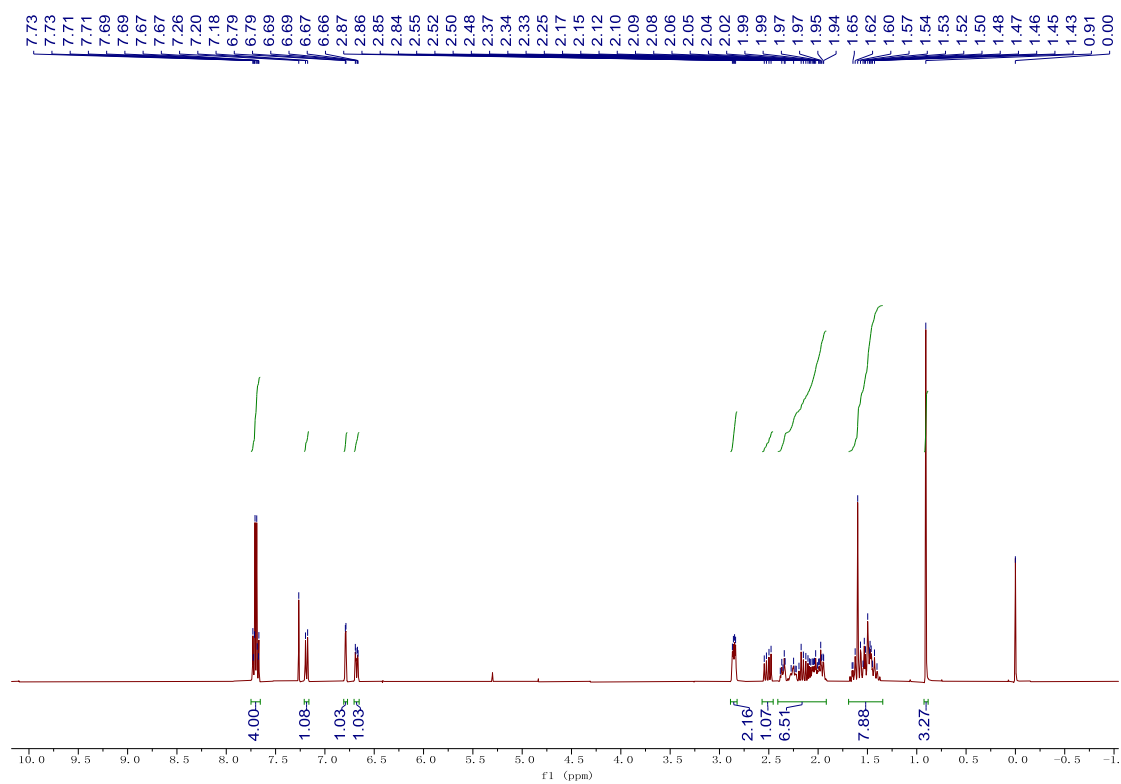

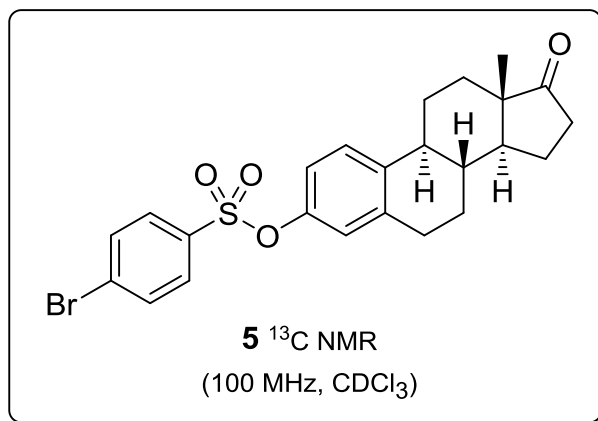

147.42  
139.19  
138.74  
134.84  
132.86  
130.03  
129.54  
126.74  
122.40  
119.18

77.48  
77.16  
76.84

50.52  
47.98  
44.20  
37.93  
35.92  
31.61  
29.42  
26.28  
25.78  
21.67  
13.93

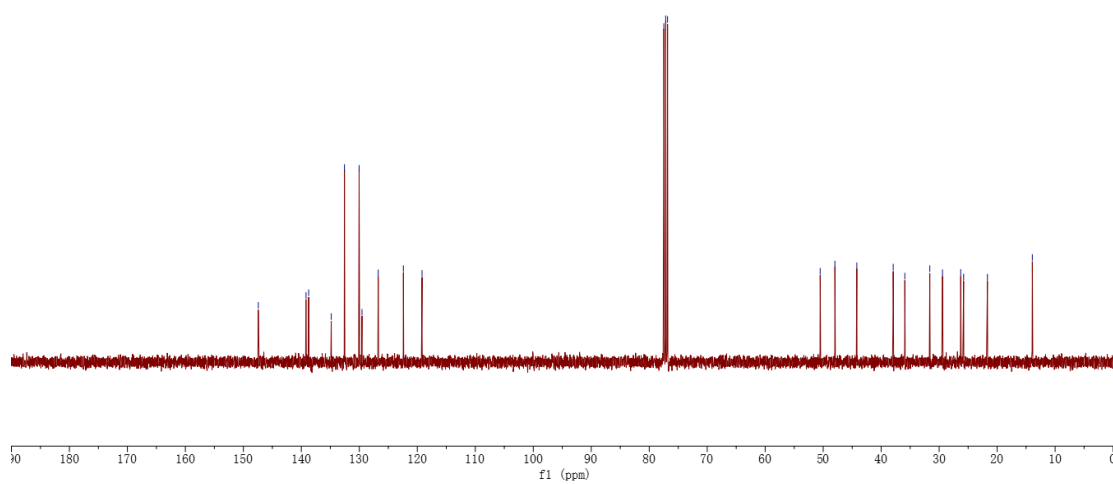

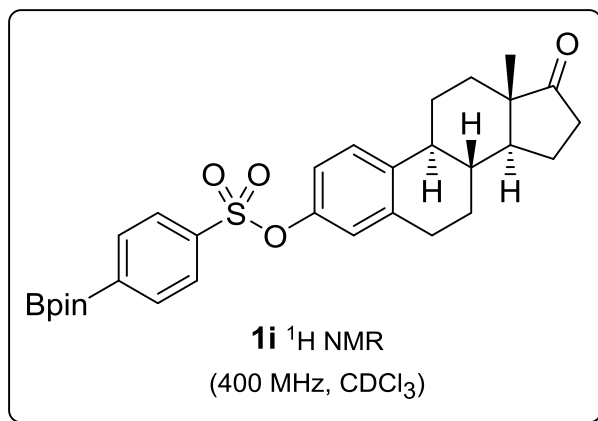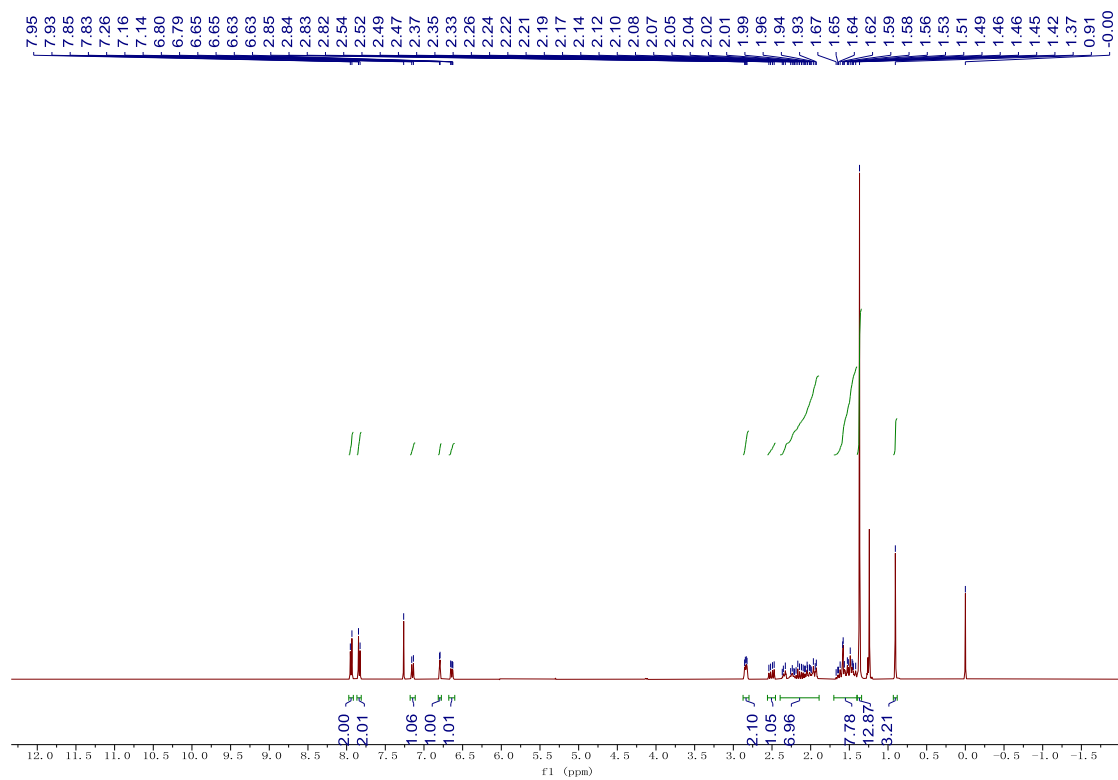



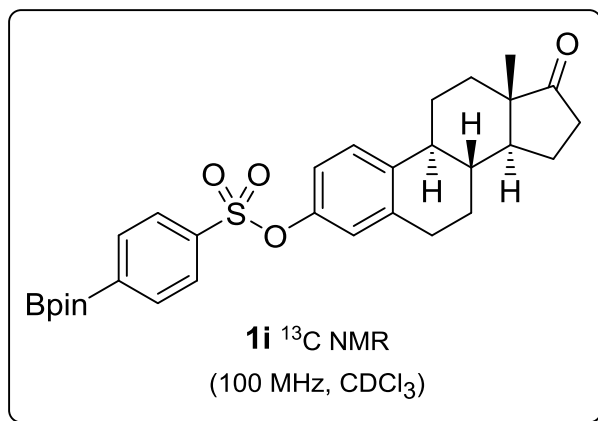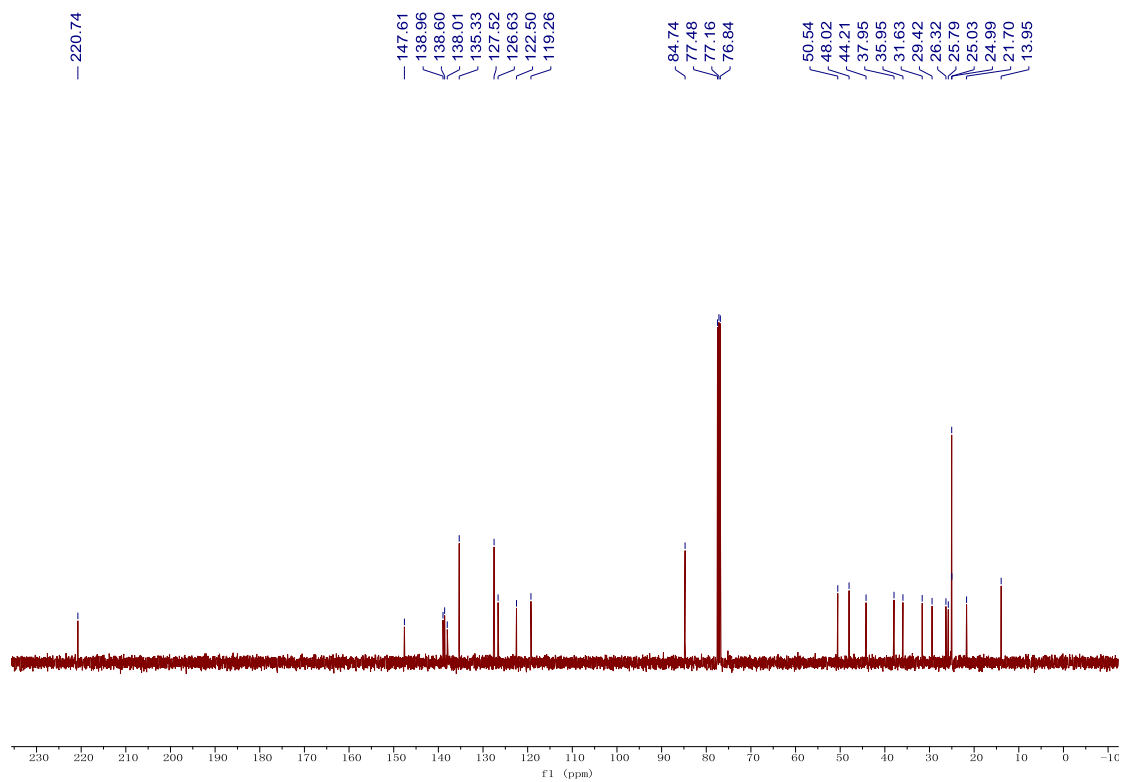

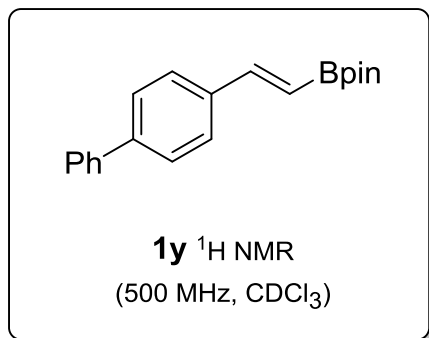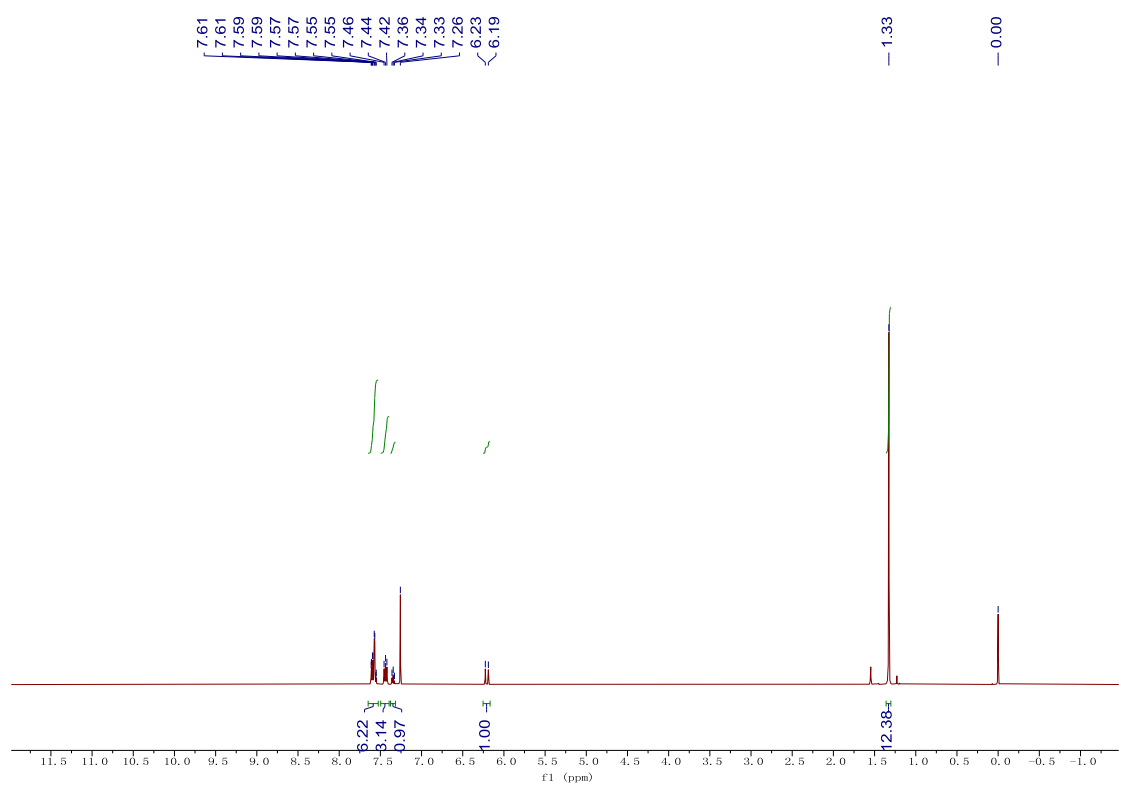

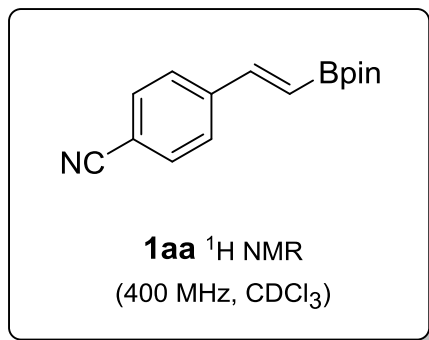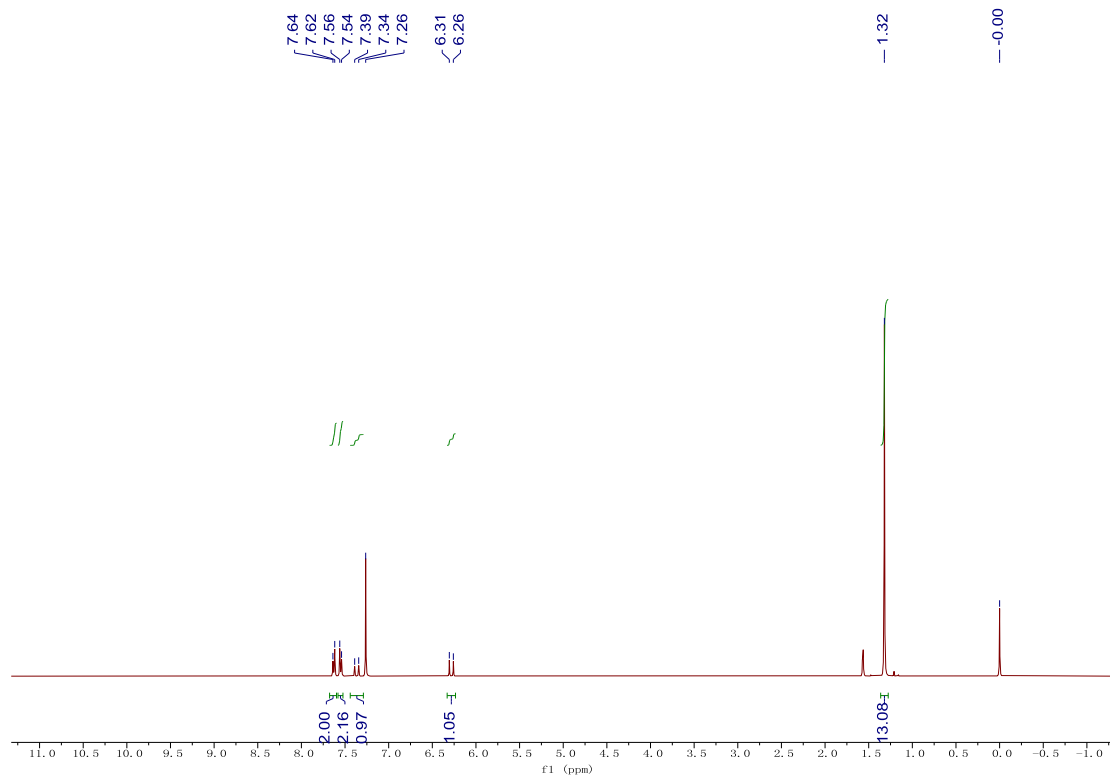

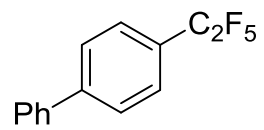

**2a**  $^1\text{H}$  NMR  
(400 MHz,  $\text{CDCl}_3$ )

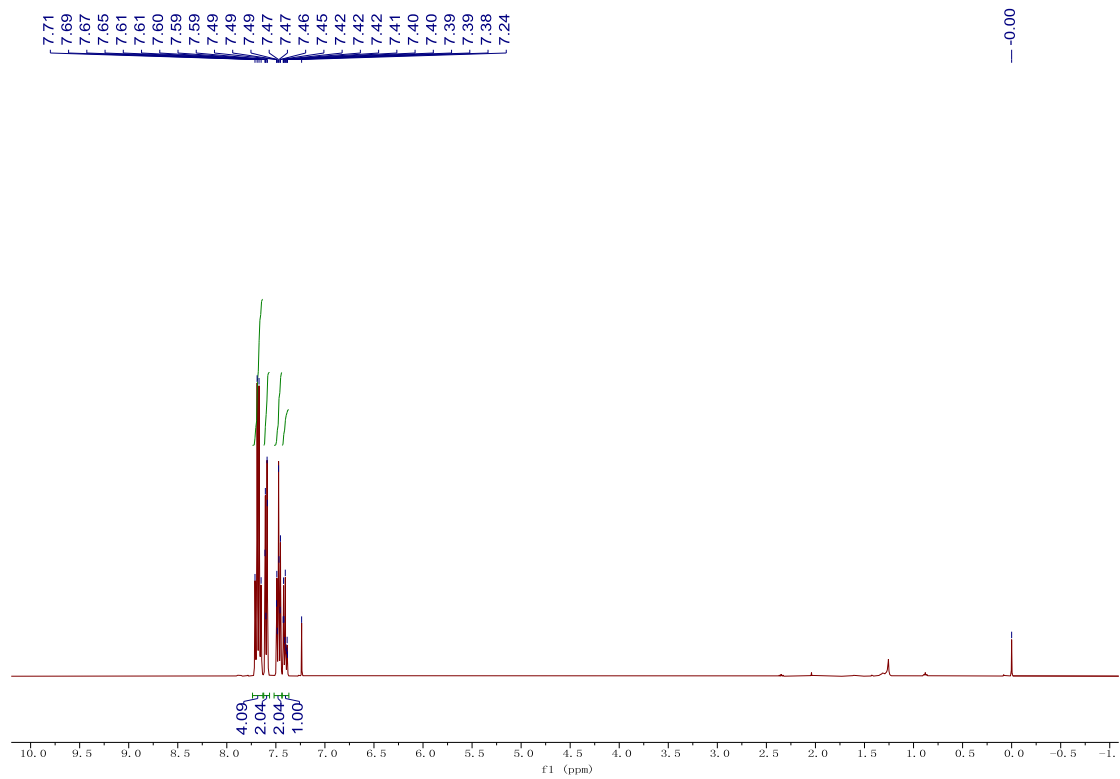

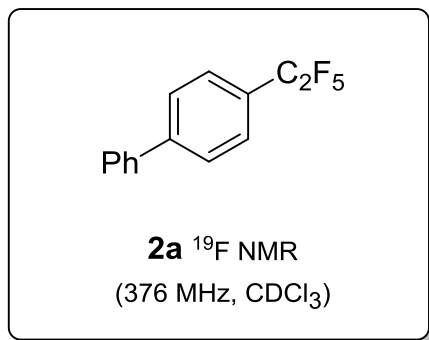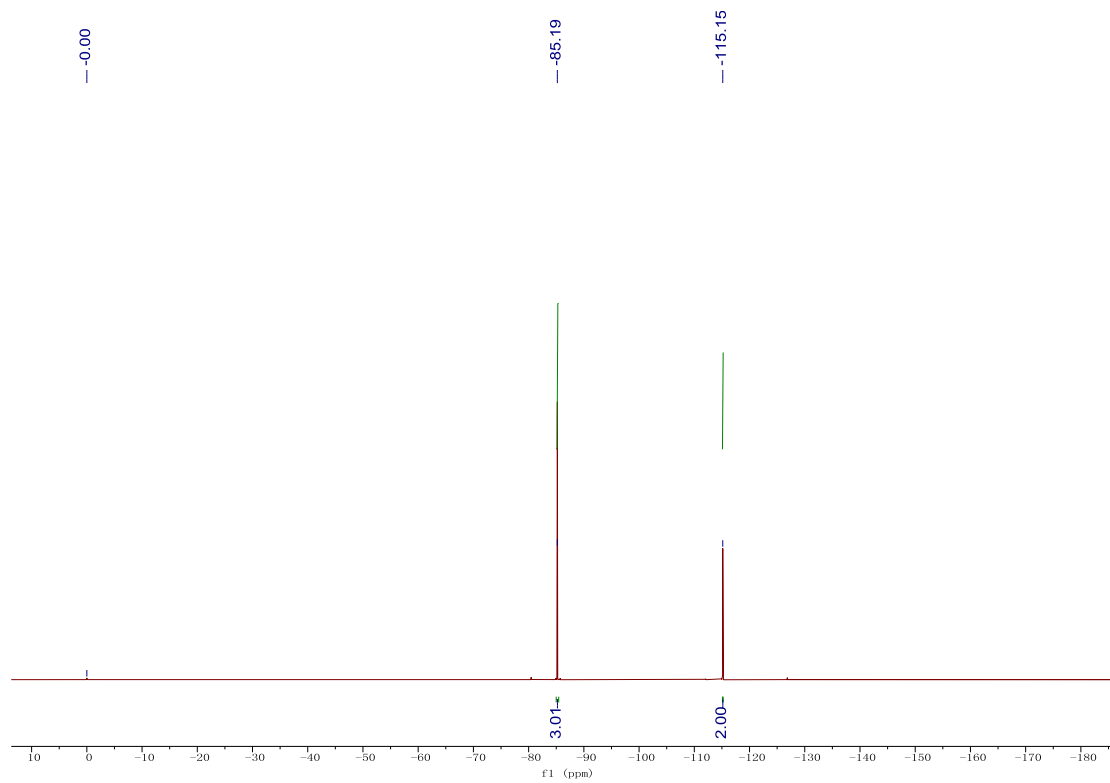

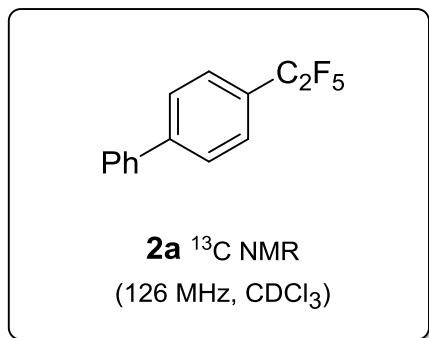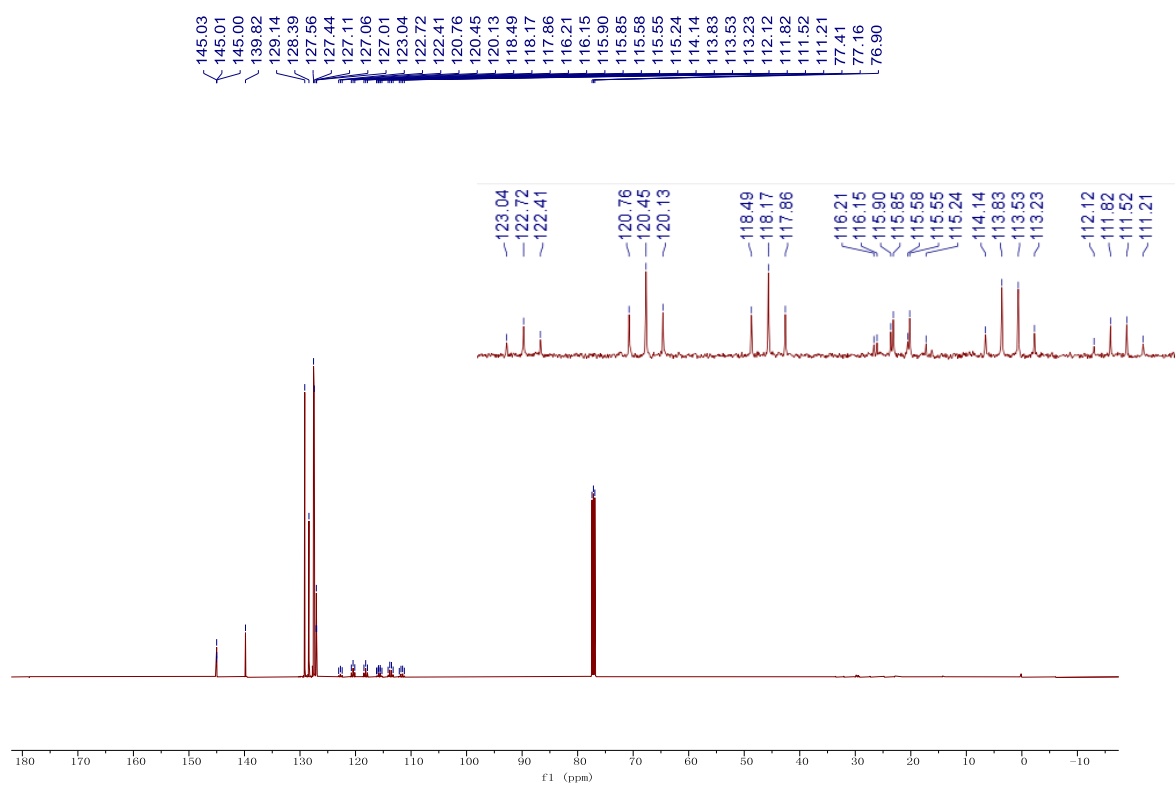

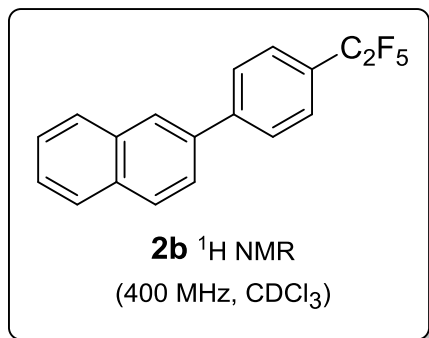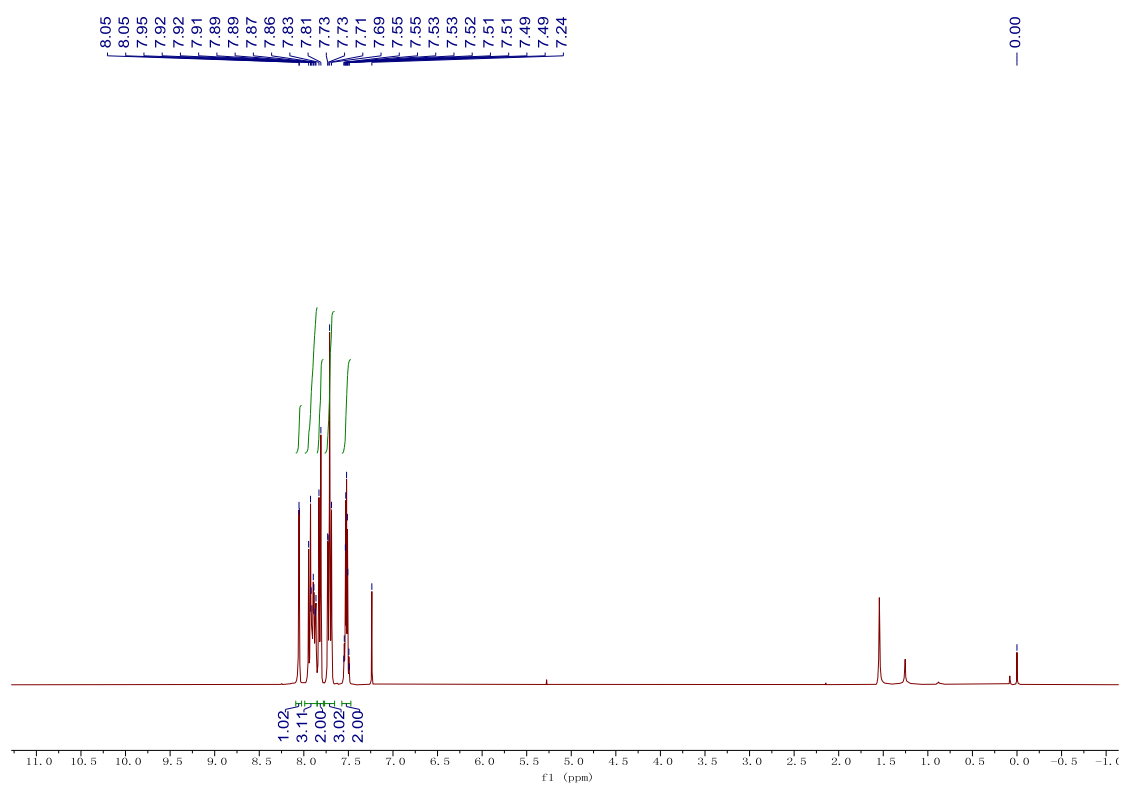

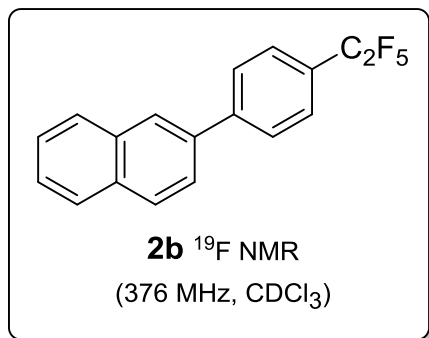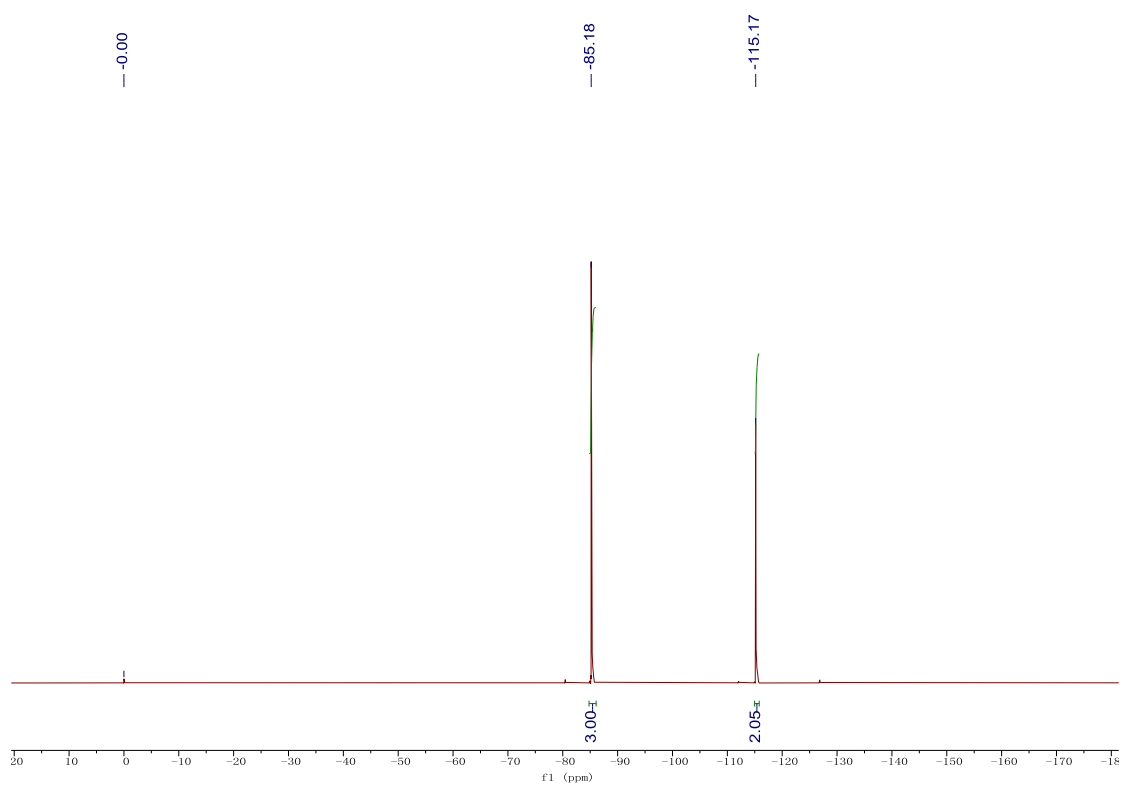



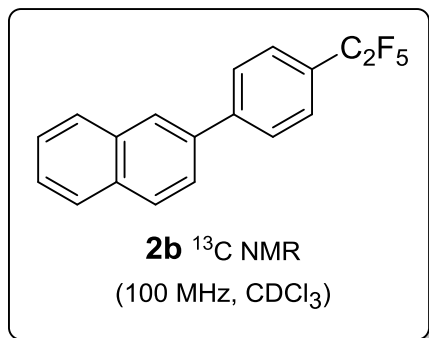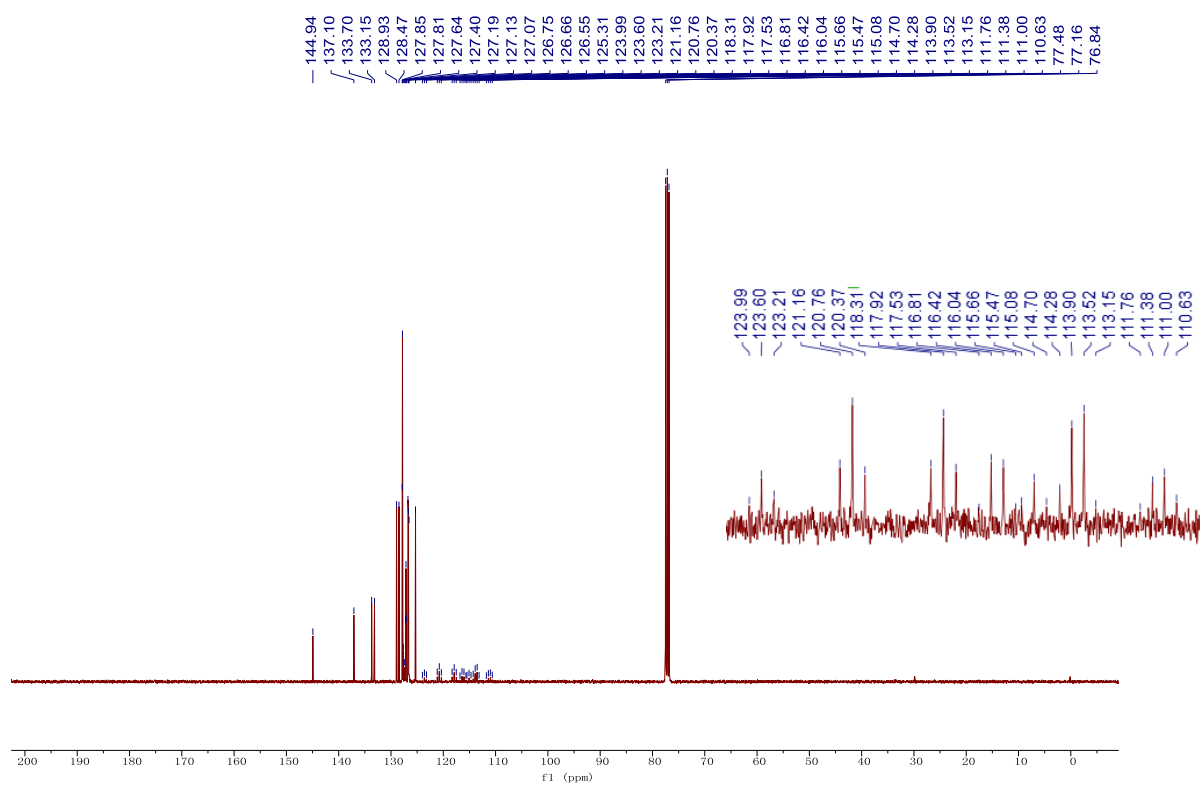

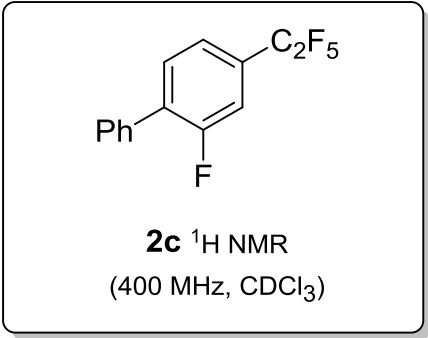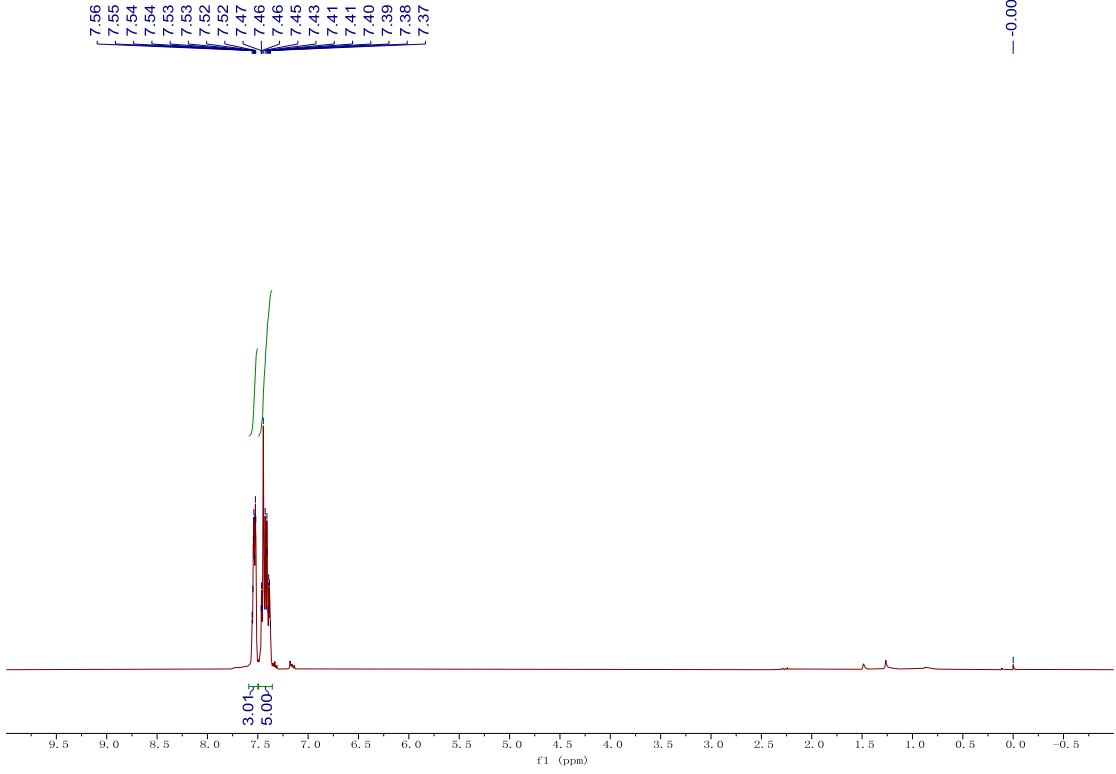

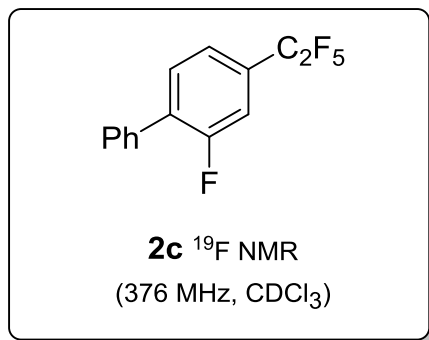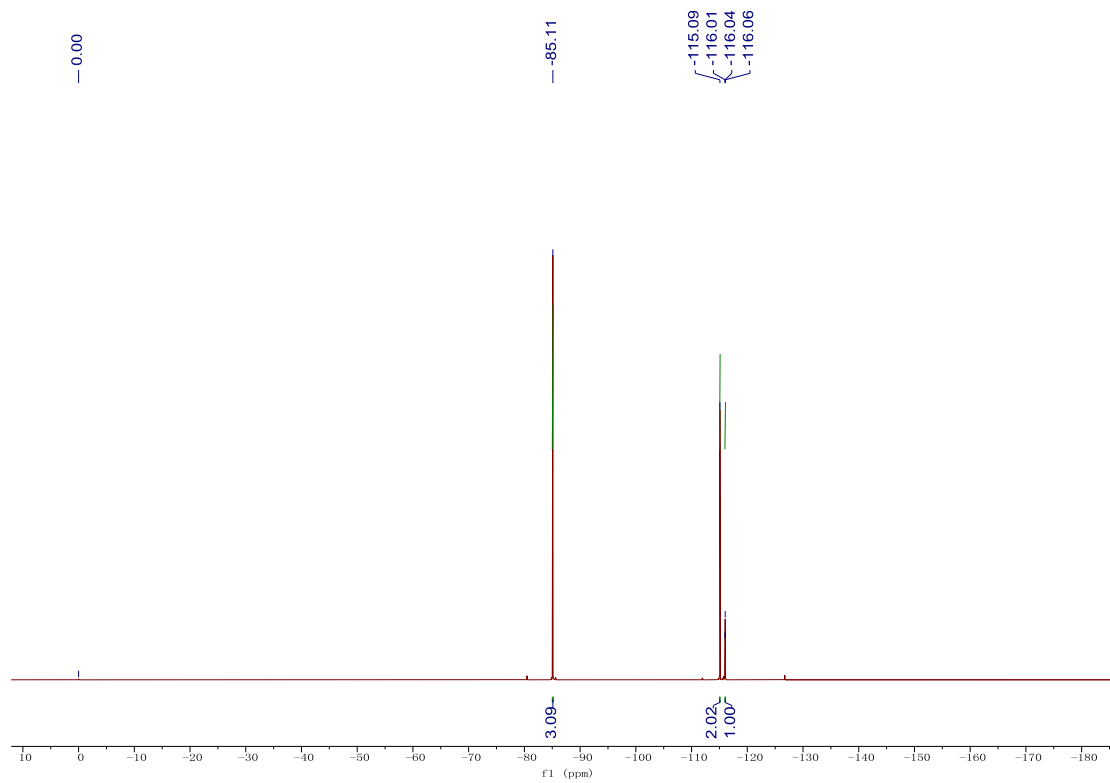

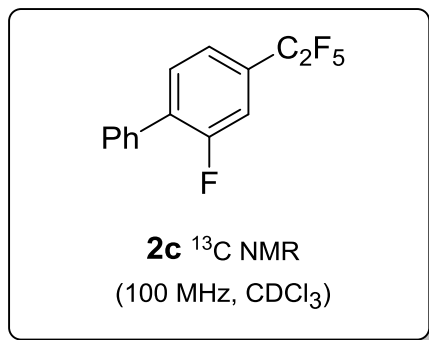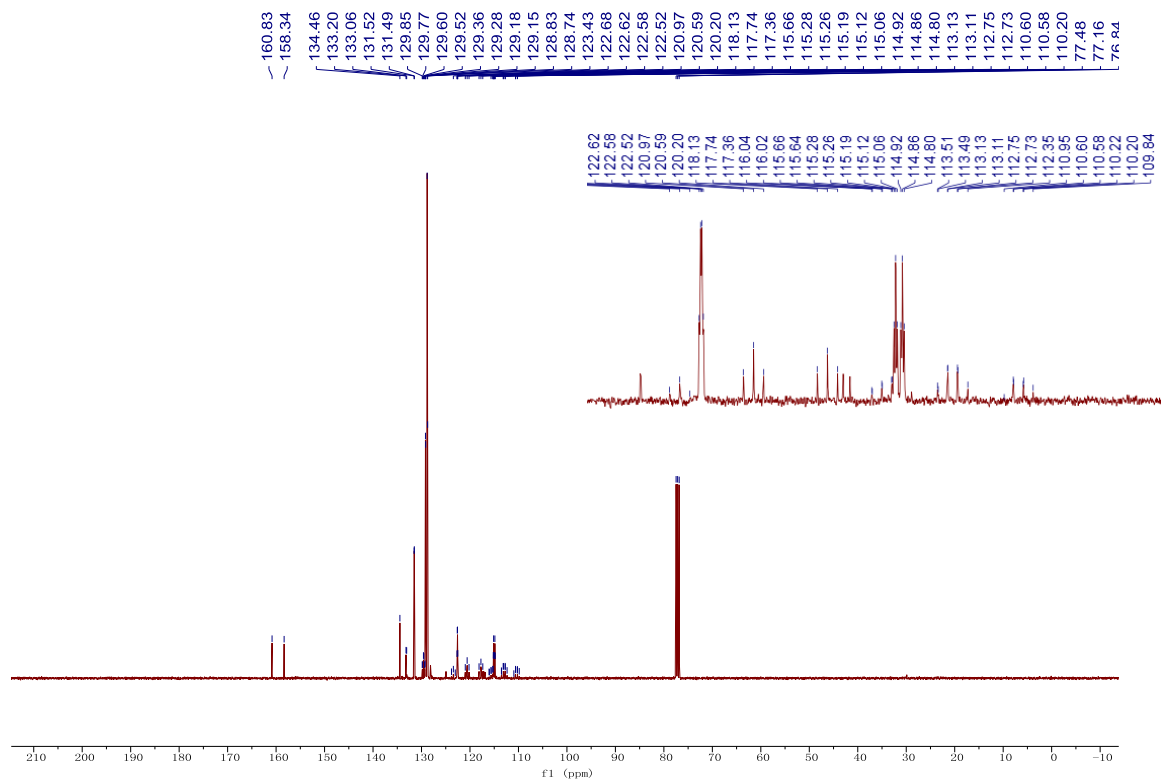

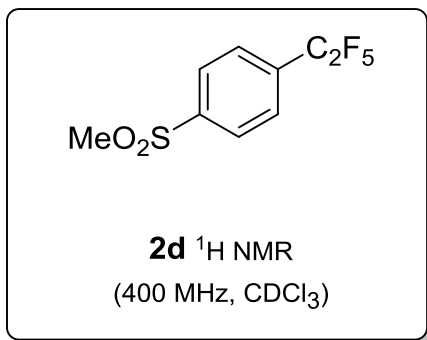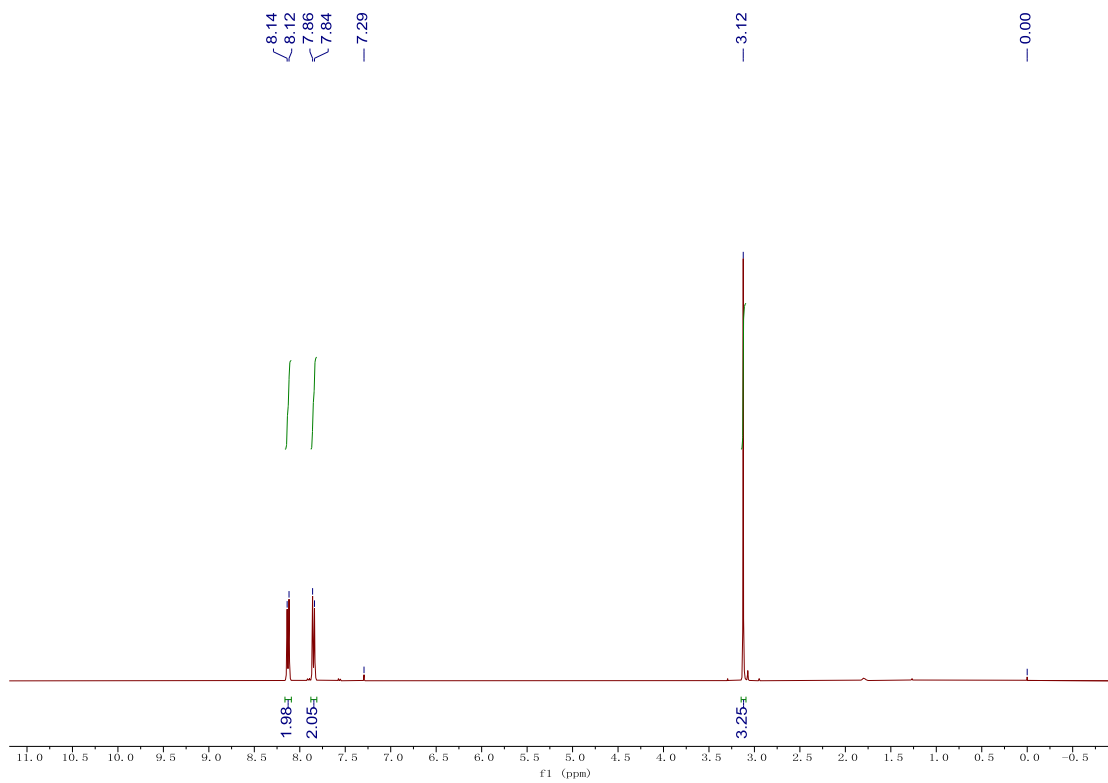

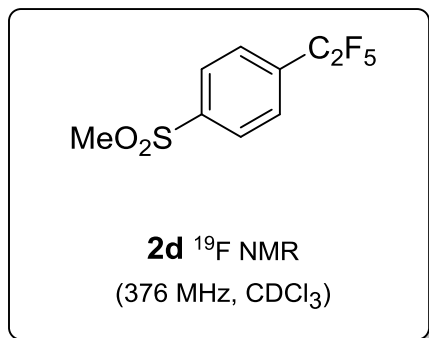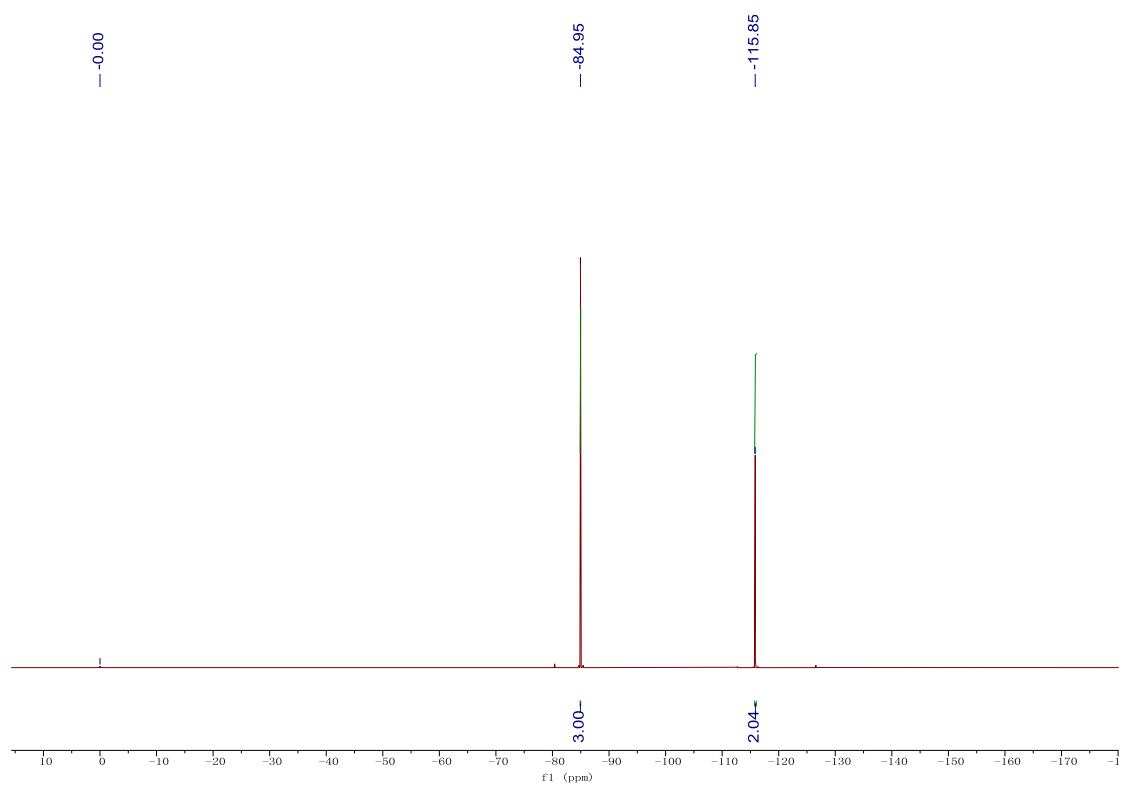

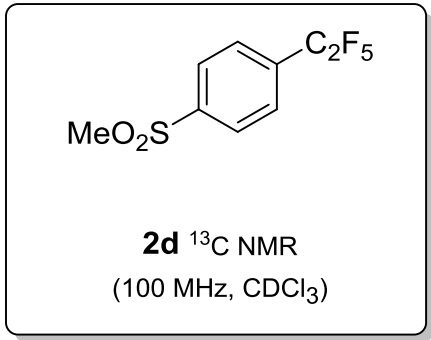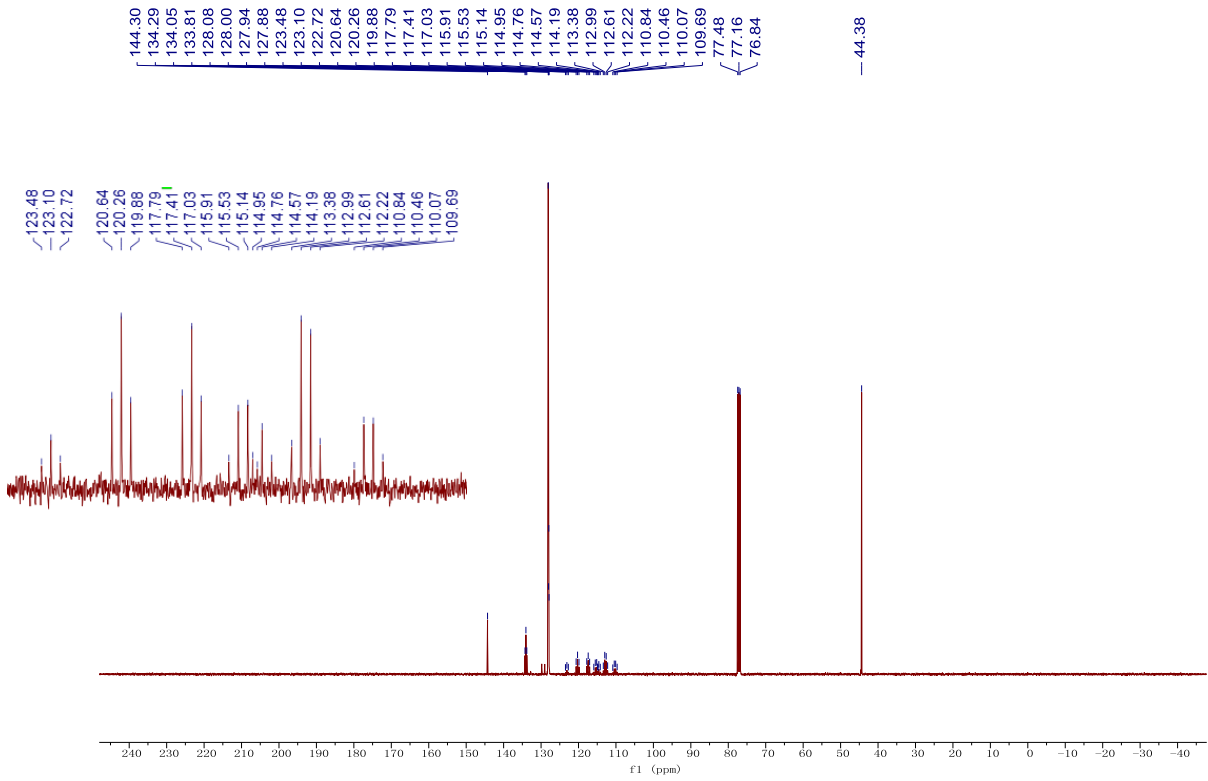

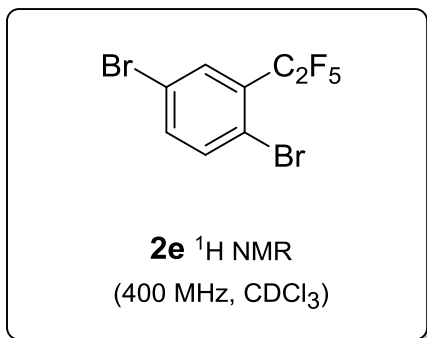

7.74  
7.73  
7.60  
7.58  
7.52  
7.51  
7.50  
7.49  
7.26

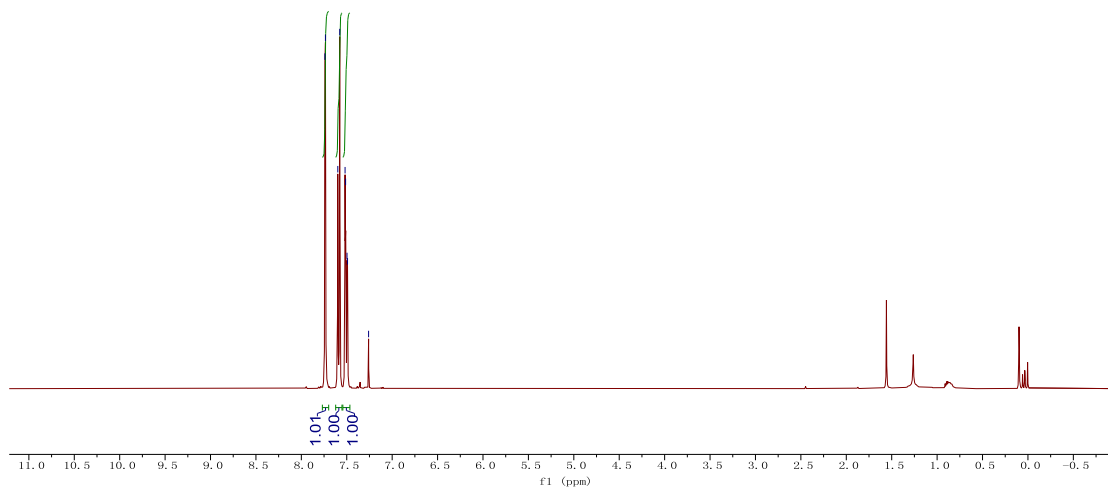



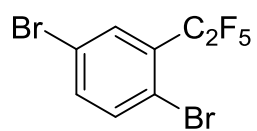

**2e**  $^{19}\text{F}$  NMR  
(376 MHz,  $\text{CDCl}_3$ )

— 83.50

— 111.48

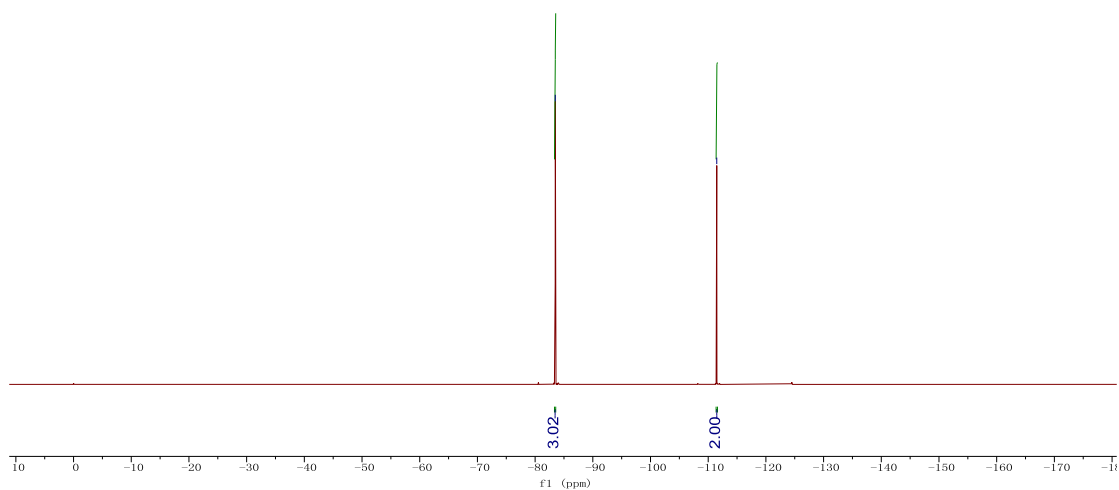

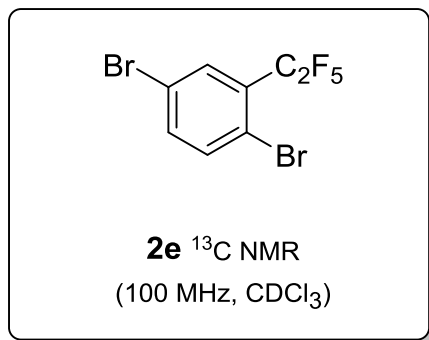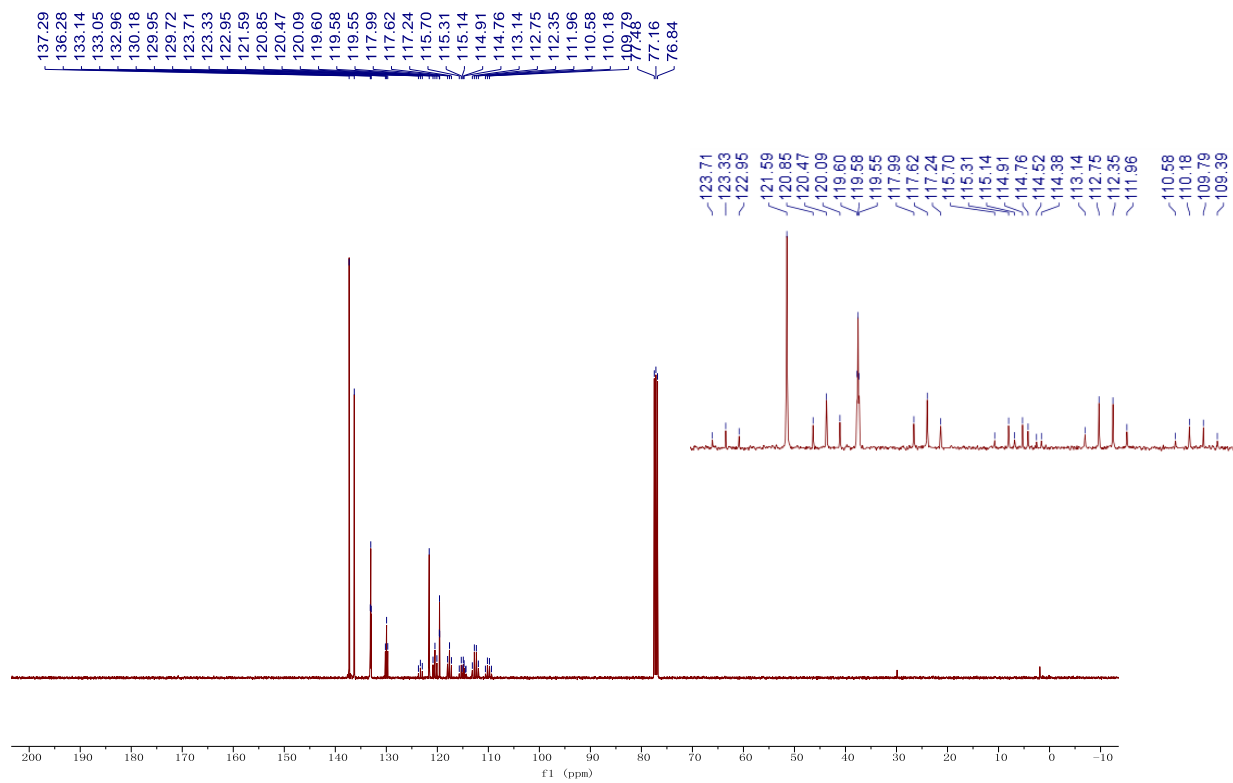

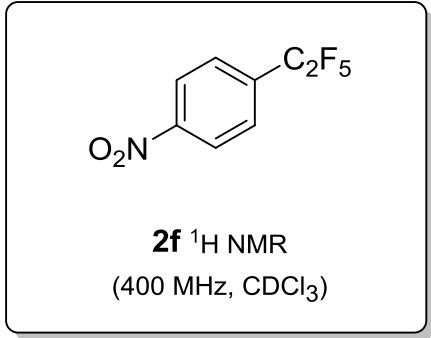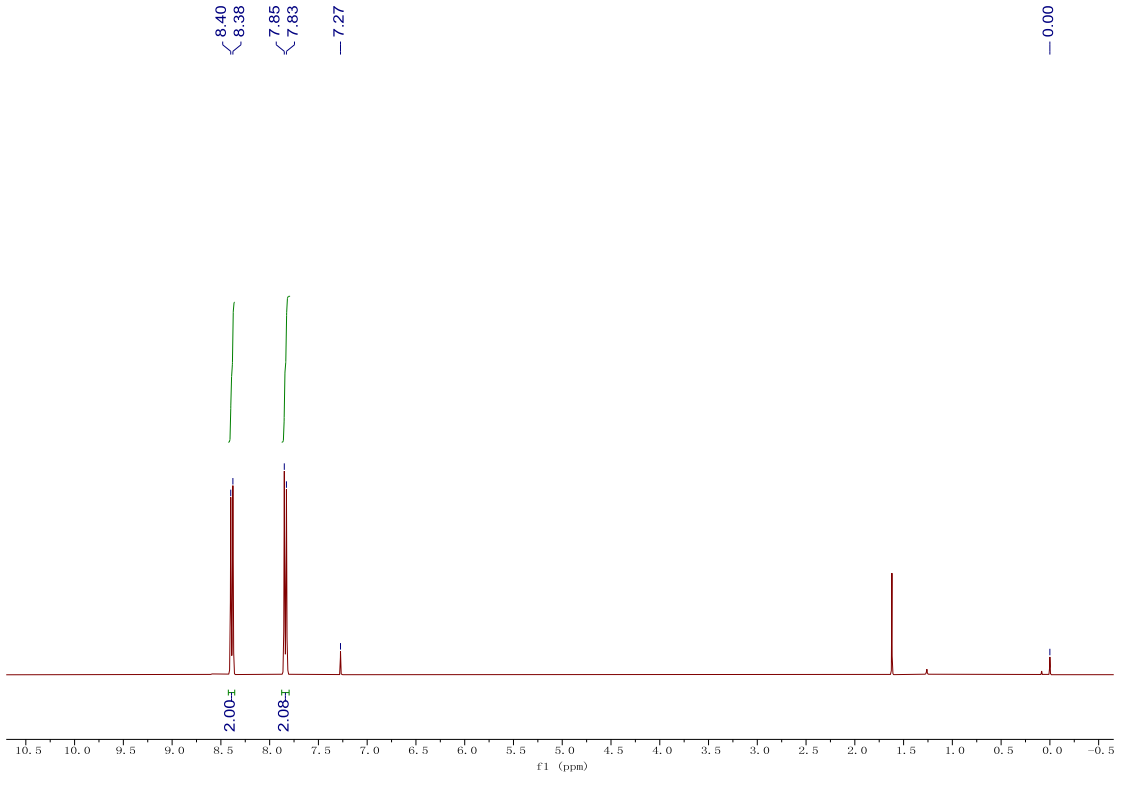

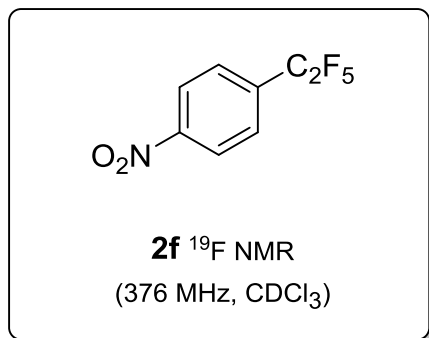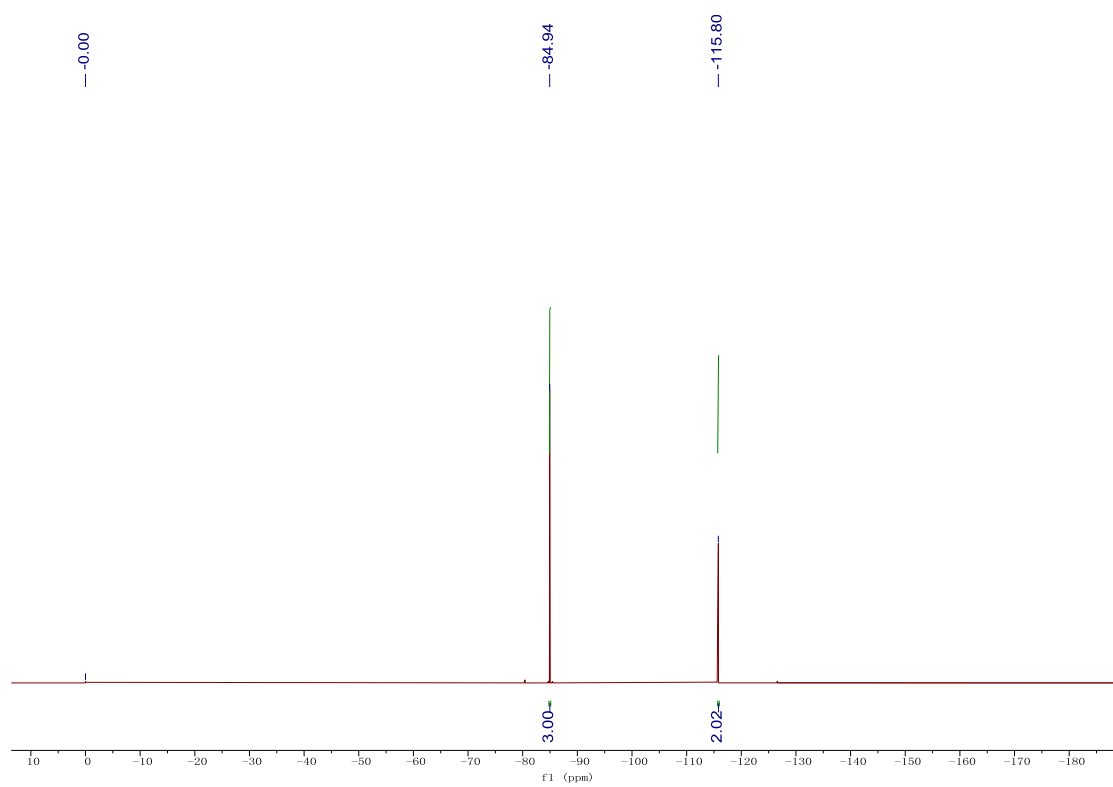

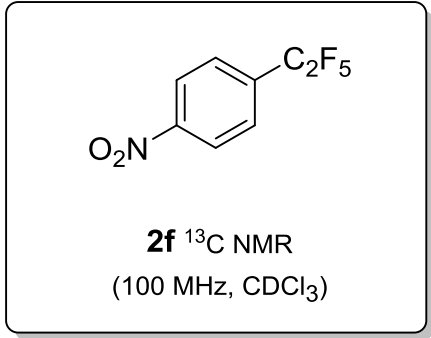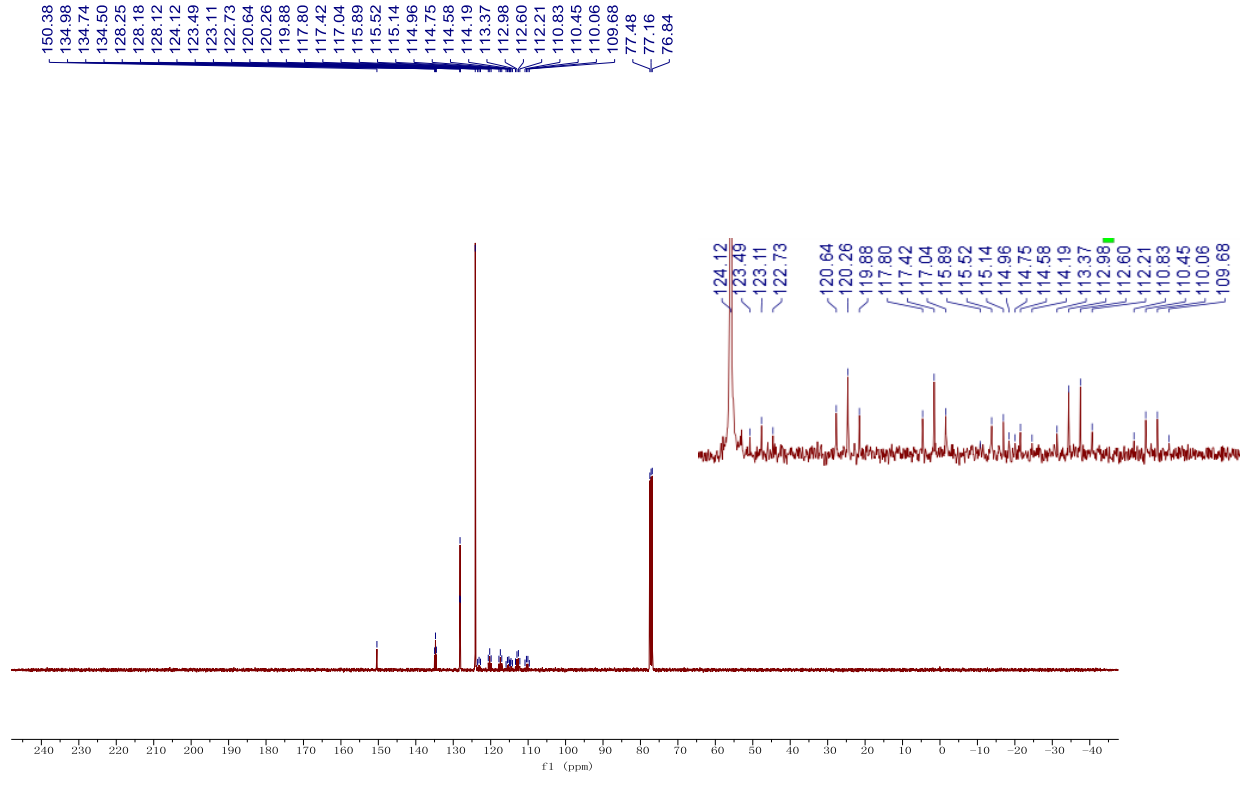

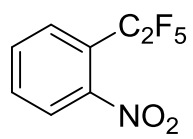

**2g**  $^1\text{H}$  NMR  
(400 MHz,  $\text{CDCl}_3$ )

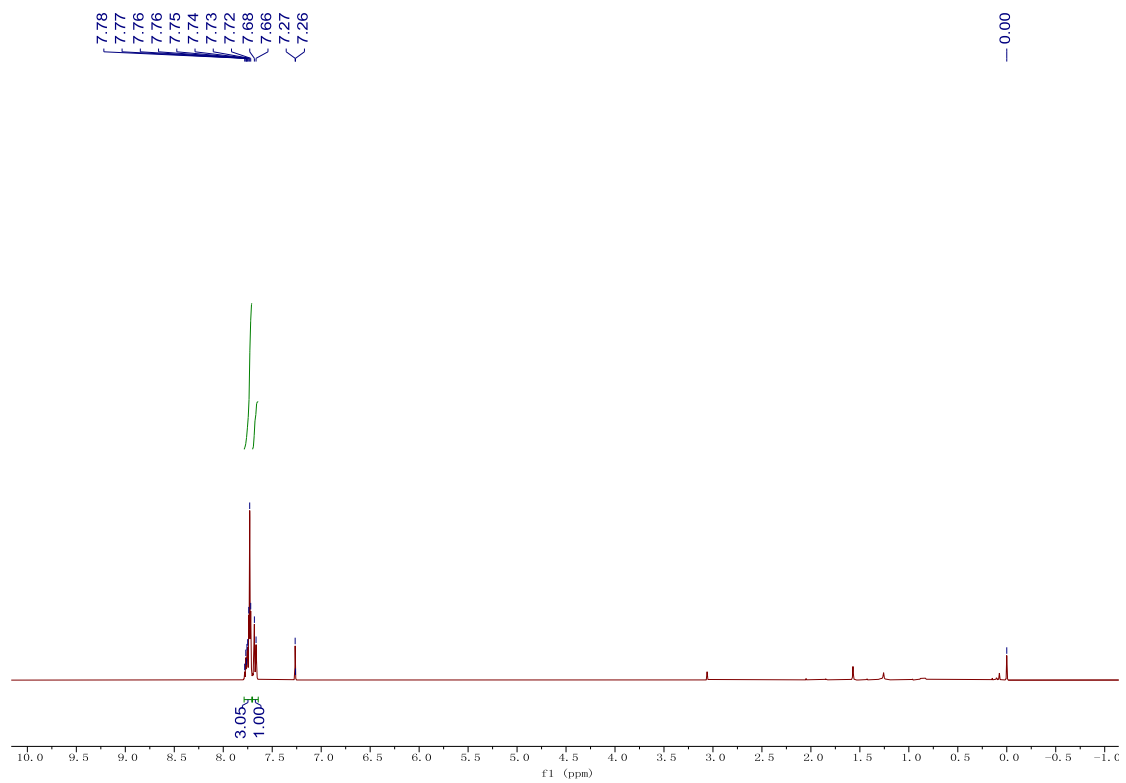

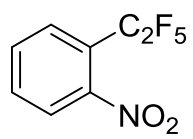

**2g**  $^{19}\text{F}$  NMR  
(376 MHz,  $\text{CDCl}_3$ )

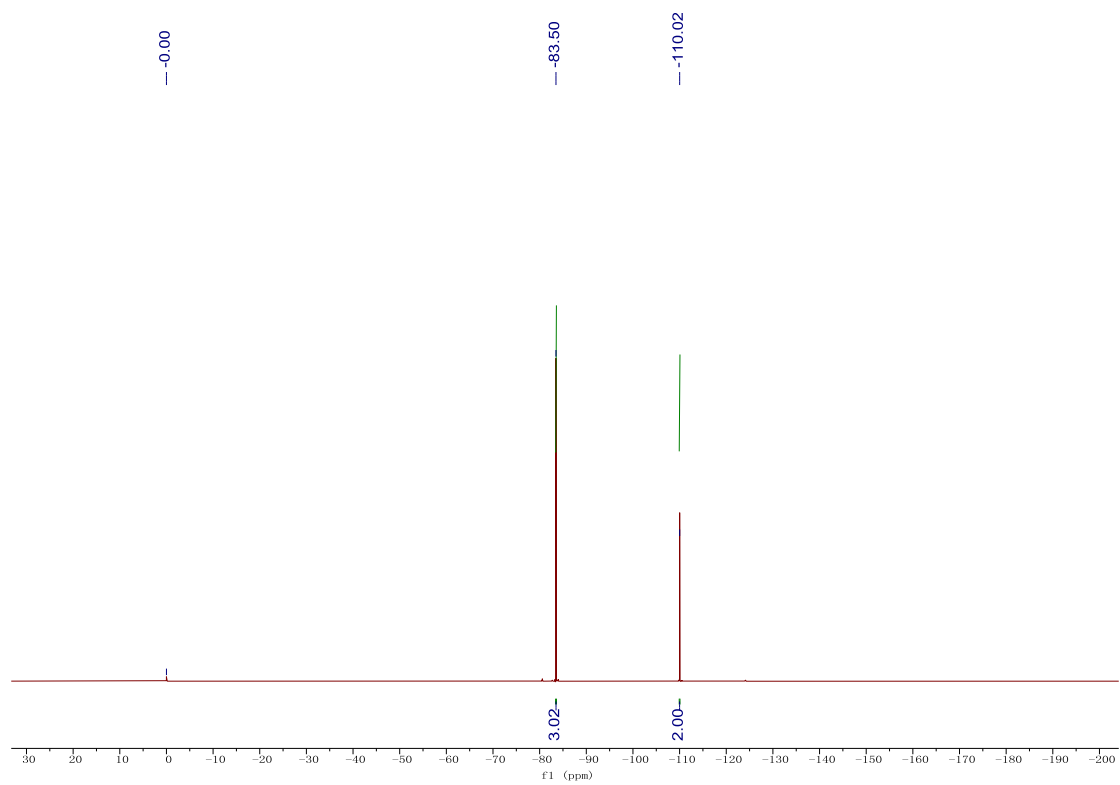

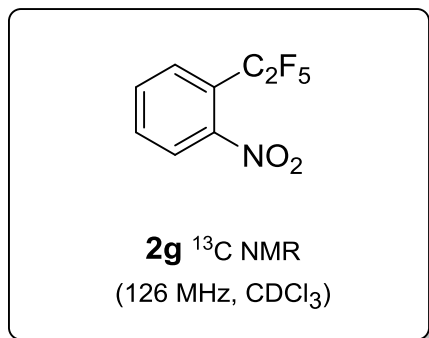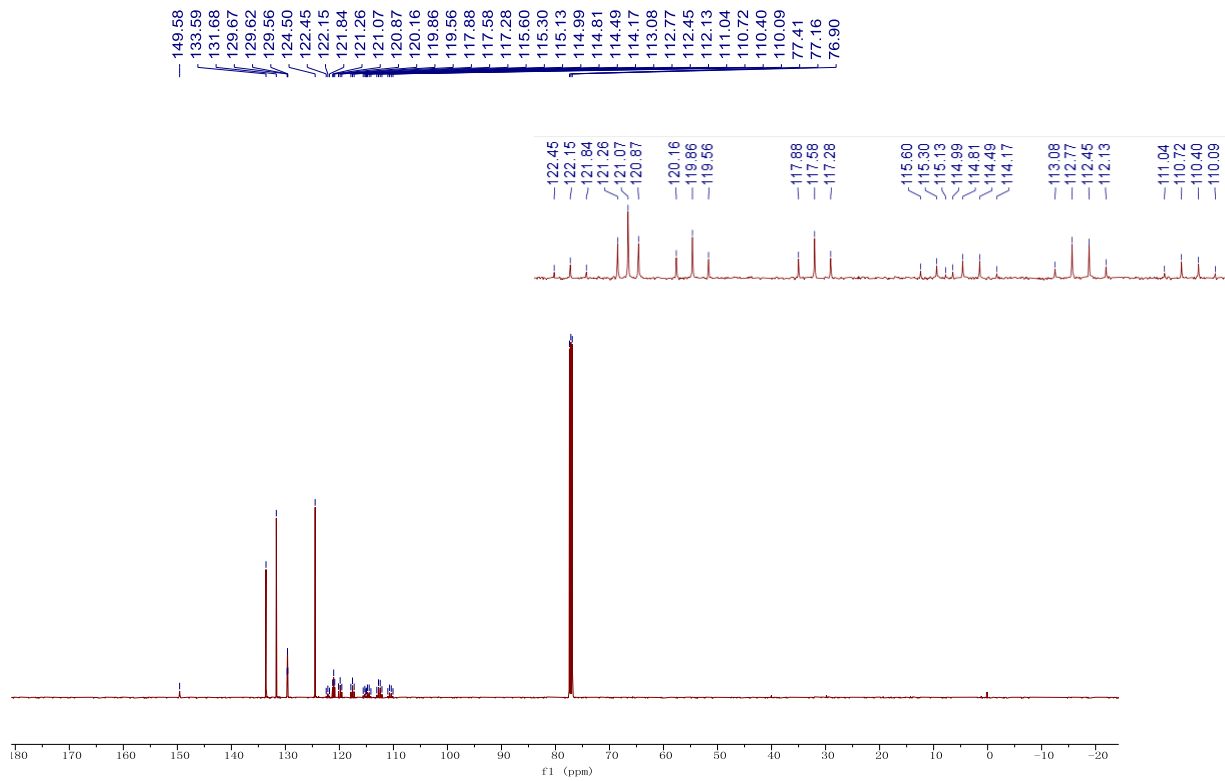



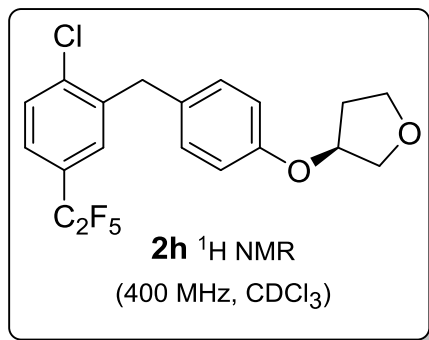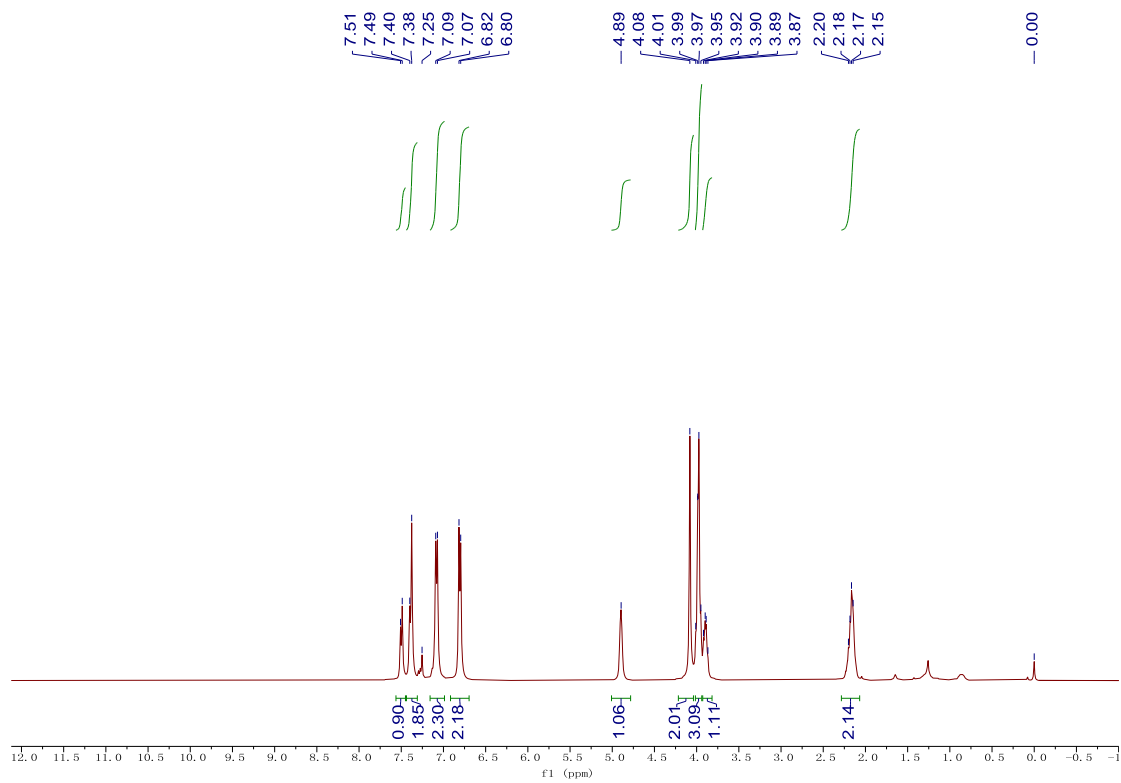

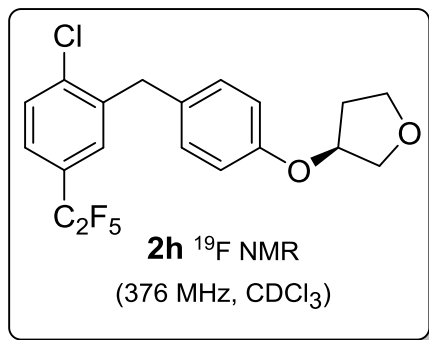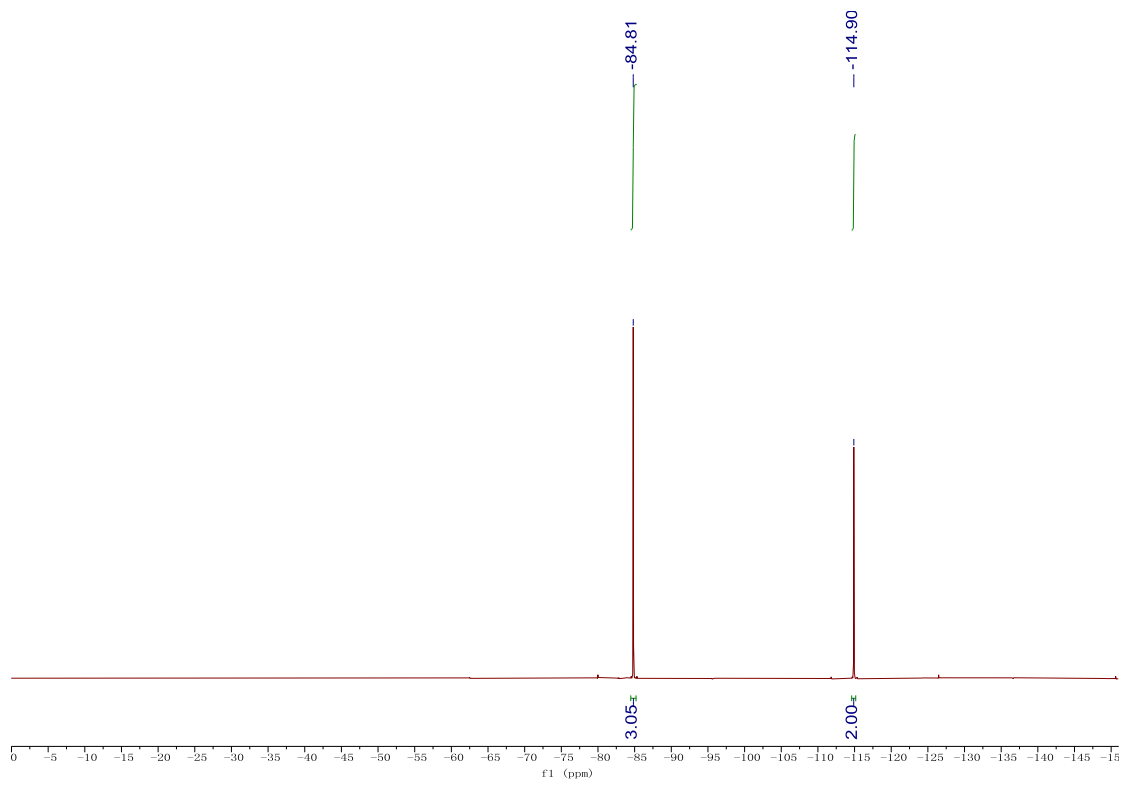

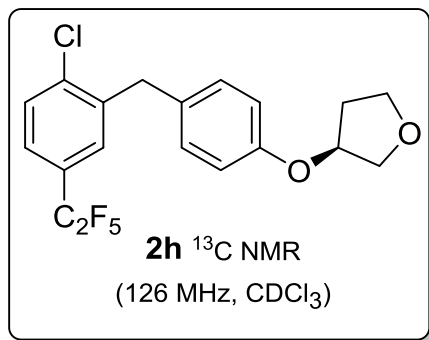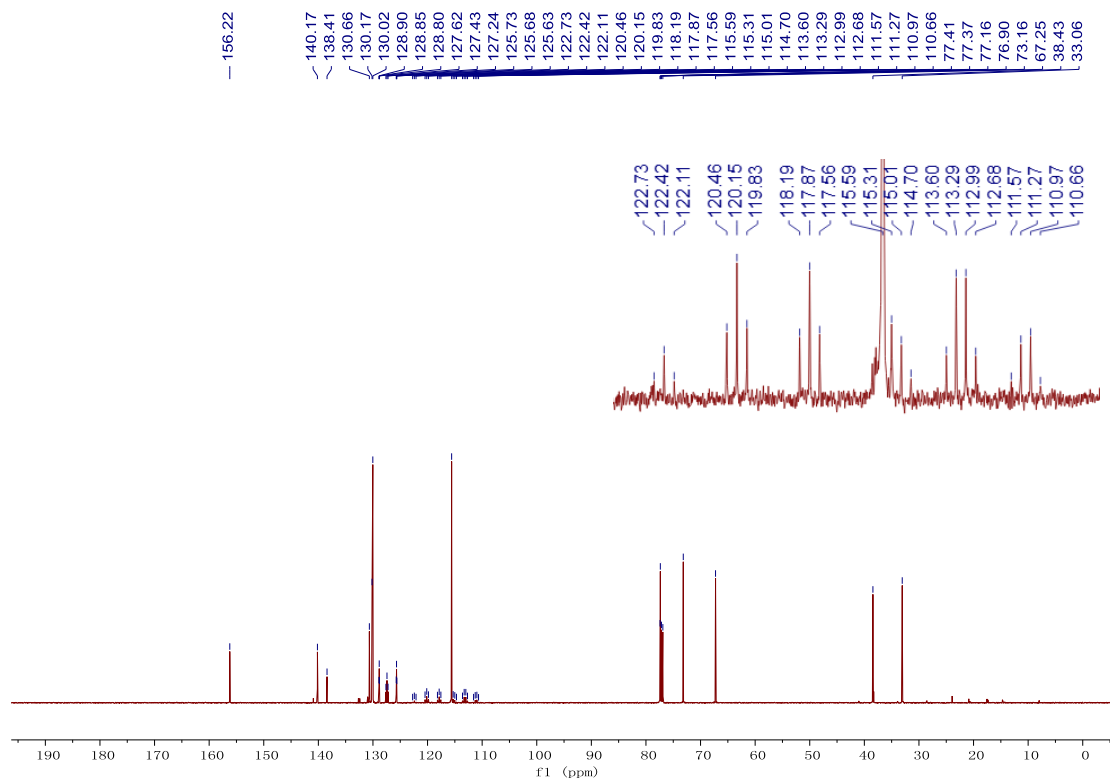

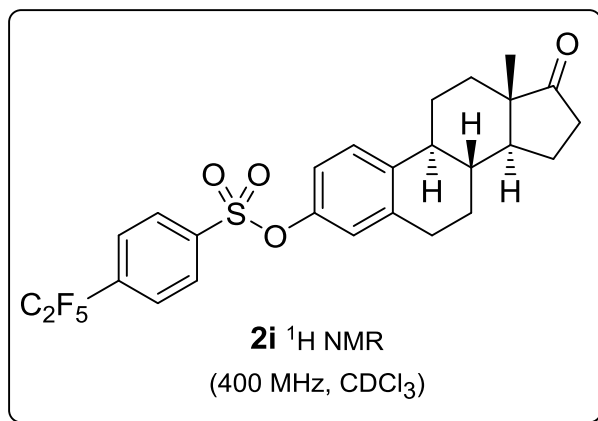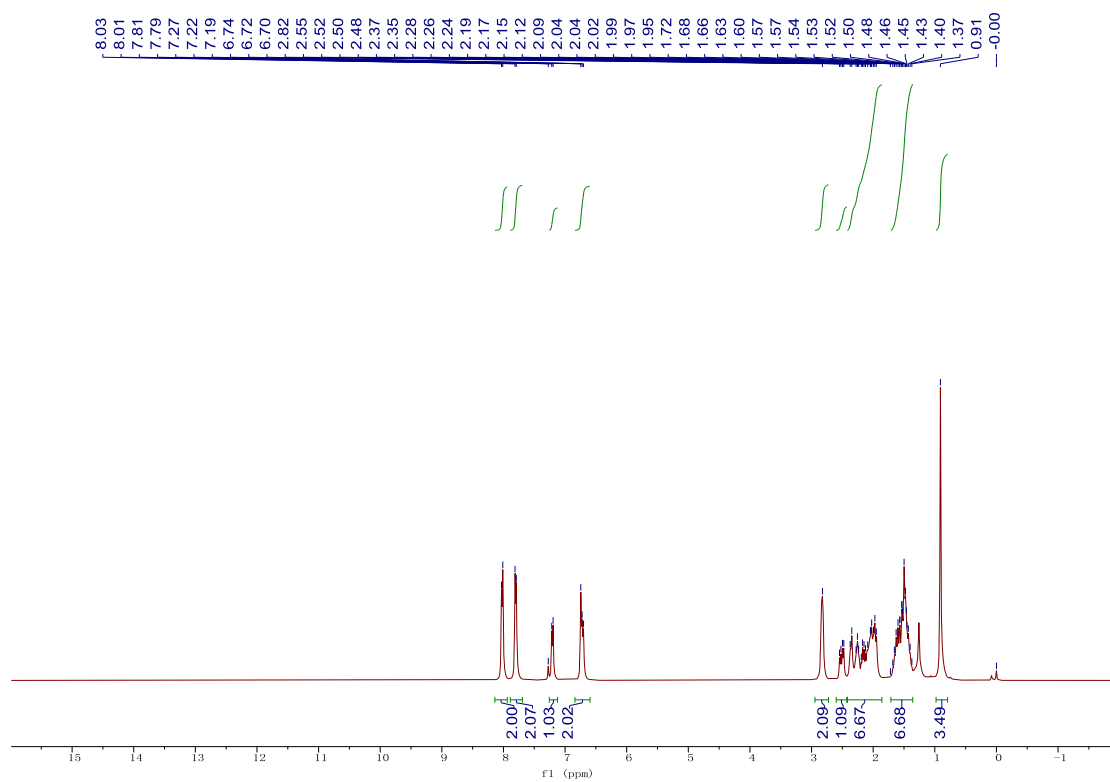

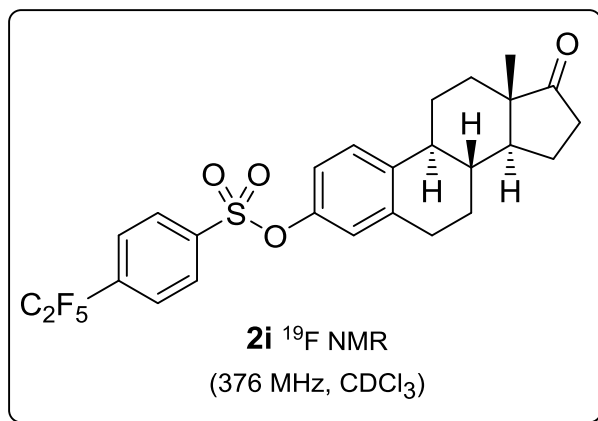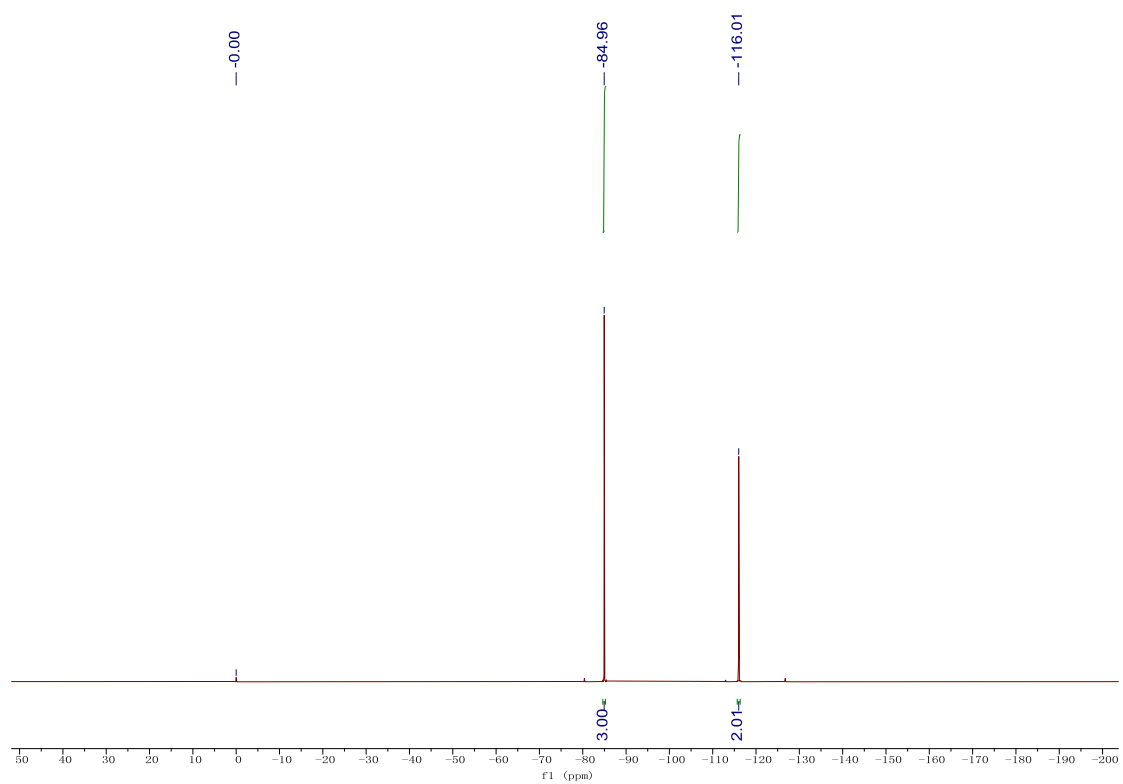

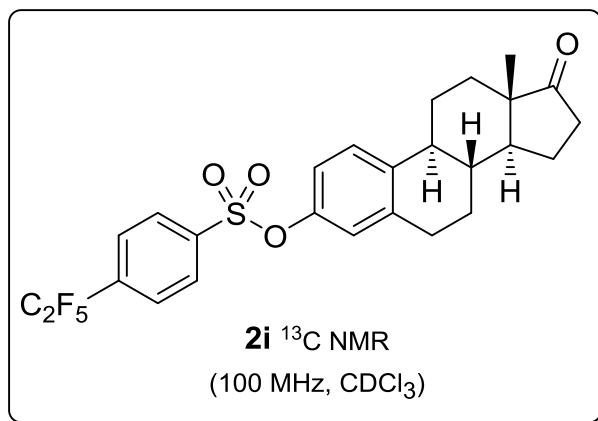

220.77  
 147.25  
 139.55  
 139.40  
 138.84  
 134.46  
 134.27  
 134.07  
 129.04  
 127.65  
 127.60  
 127.55  
 126.85  
 122.51  
 122.30  
 122.20  
 121.90  
 120.23  
 119.93  
 119.62  
 119.14  
 117.96  
 117.65  
 117.35  
 115.68  
 115.38  
 115.22  
 115.07  
 114.91  
 114.60  
 114.30  
 113.19  
 112.88  
 112.58  
 112.27  
 111.16  
 110.85  
 110.54  
 110.24  
 77.42  
 77.16  
 76.91  
 50.46  
 47.97  
 44.17  
 37.88  
 35.91  
 31.96  
 29.37  
 26.22  
 25.74  
 21.65  
 13.89

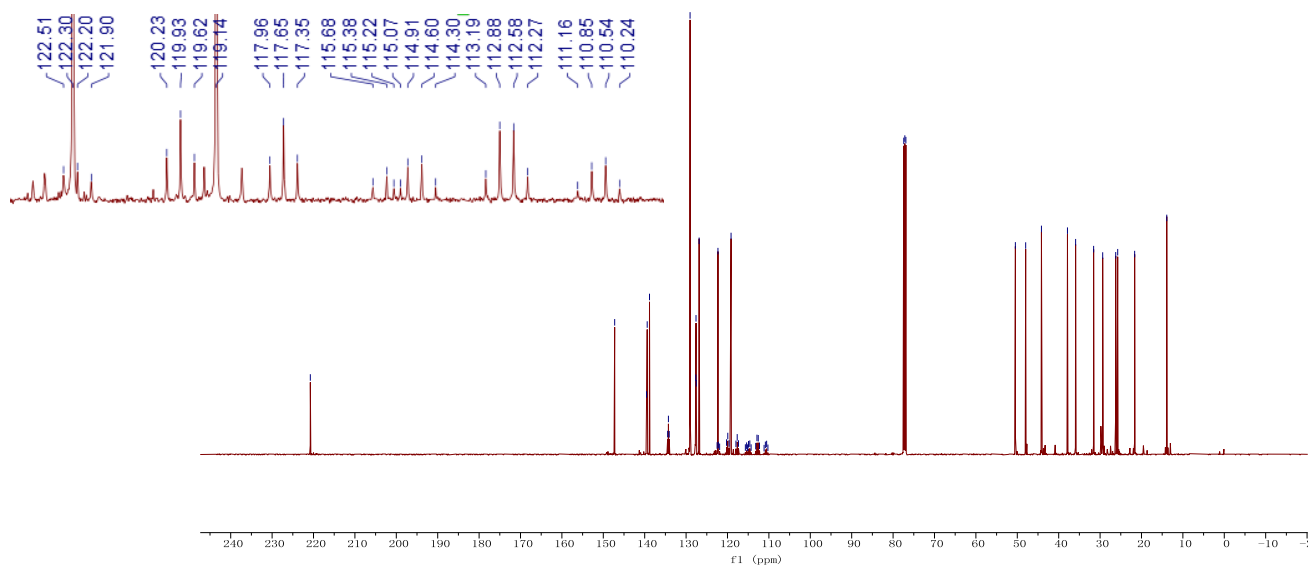

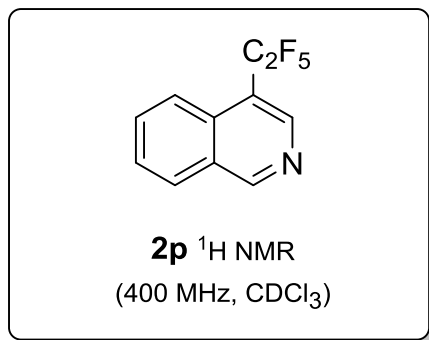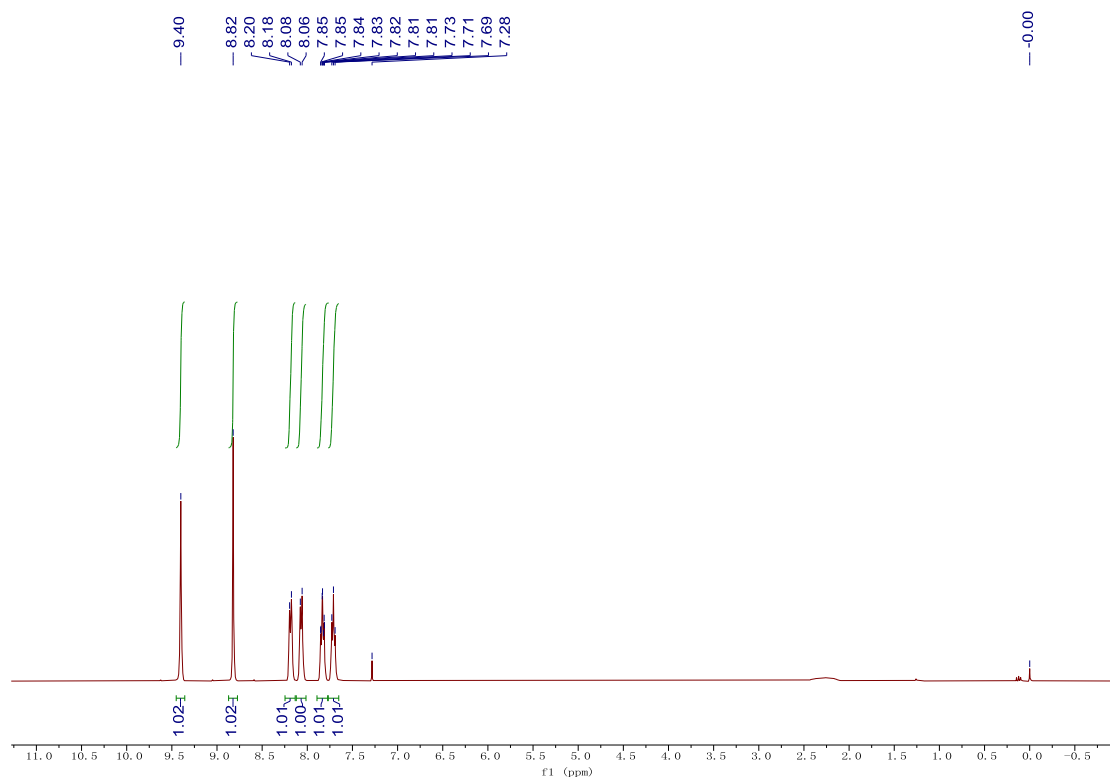

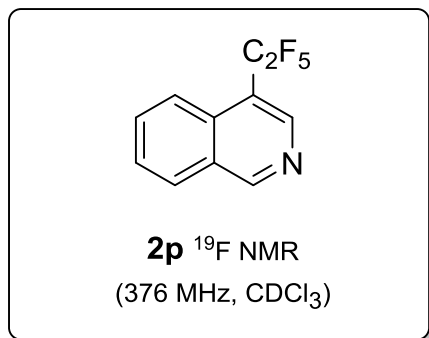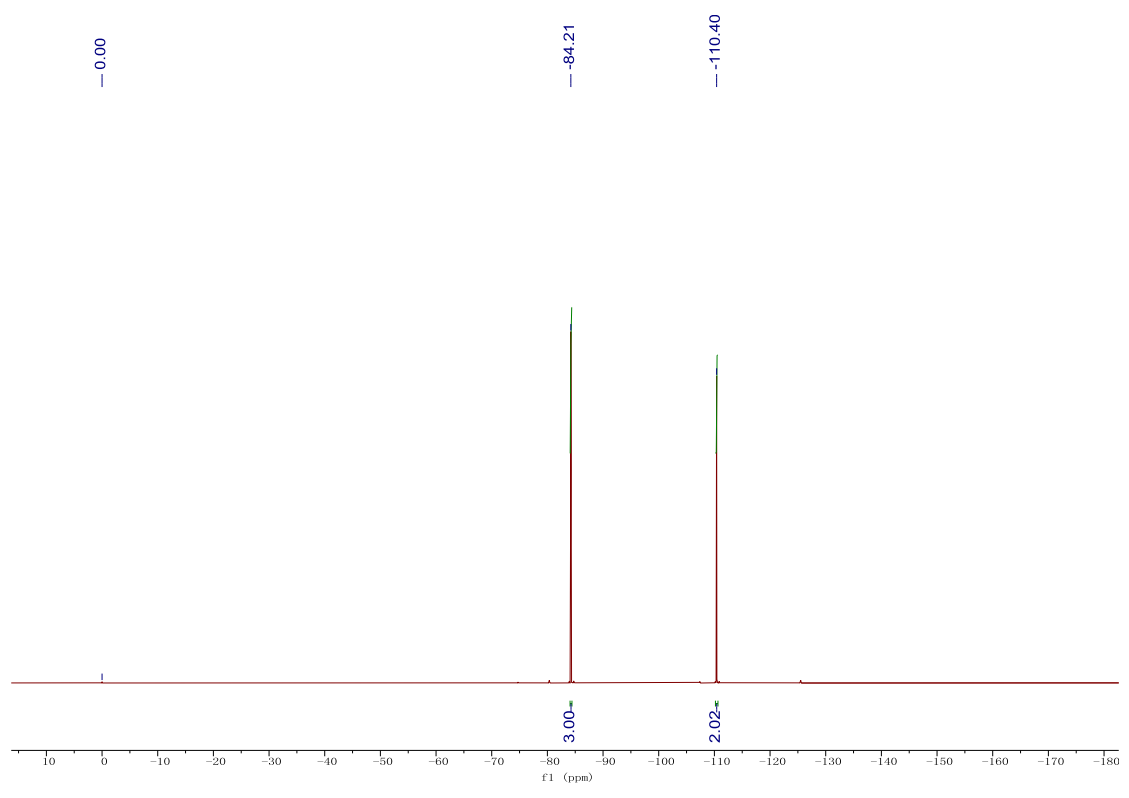



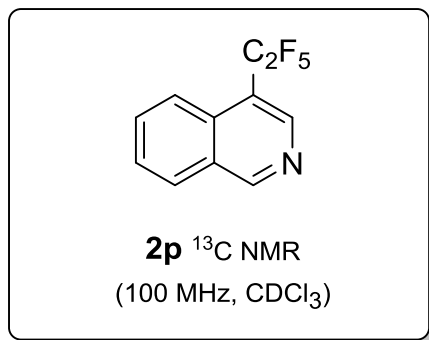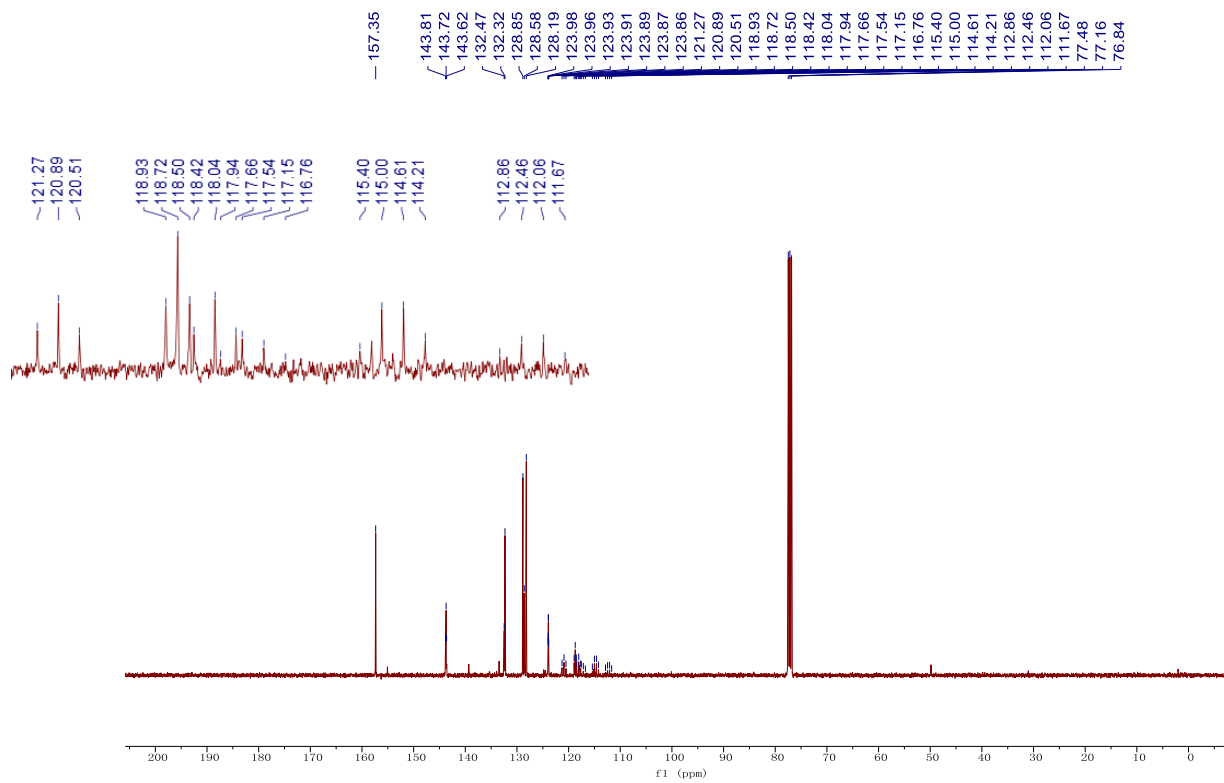

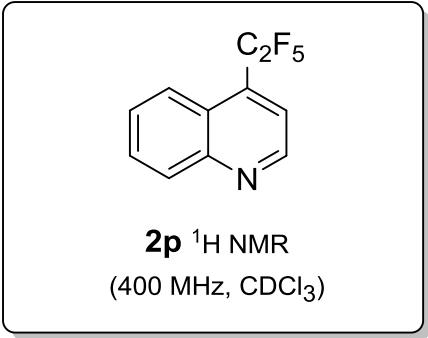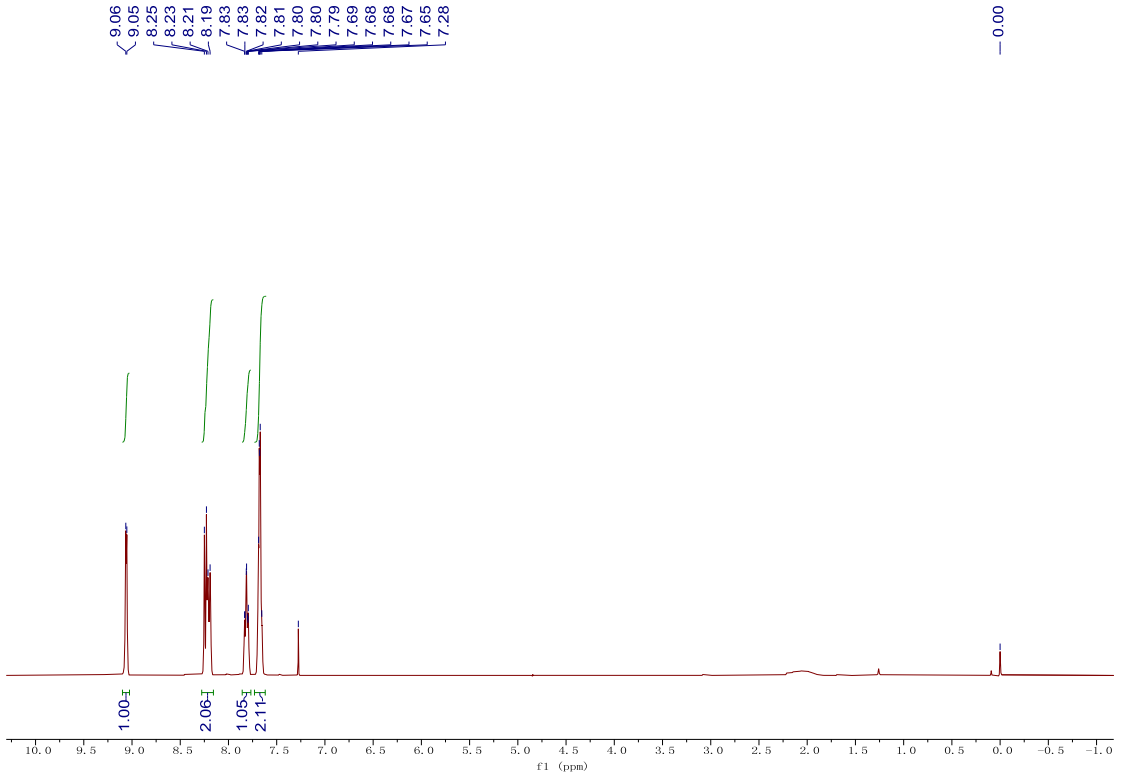

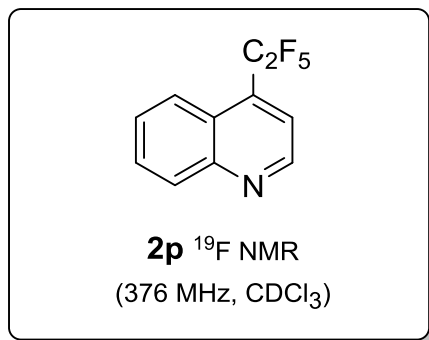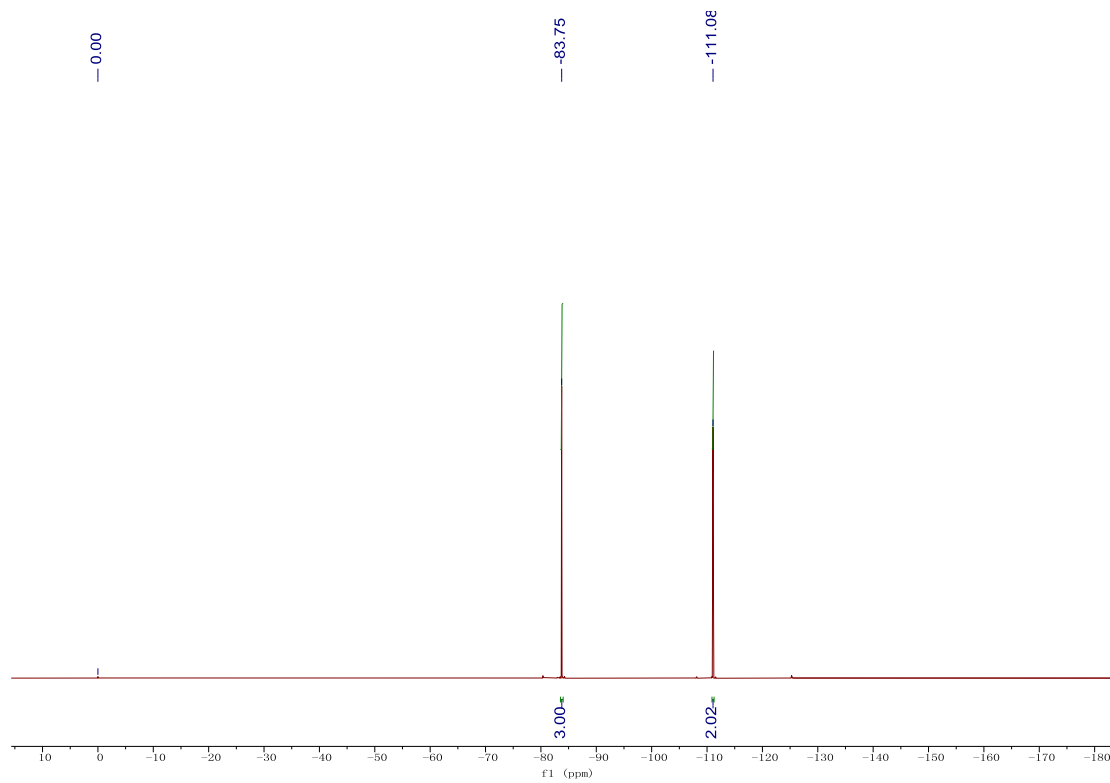

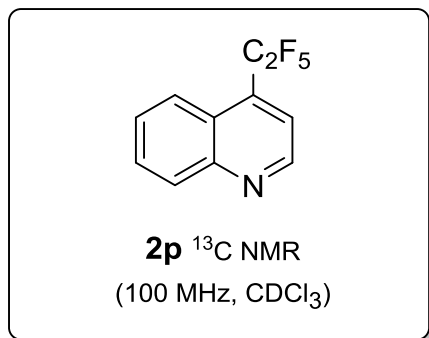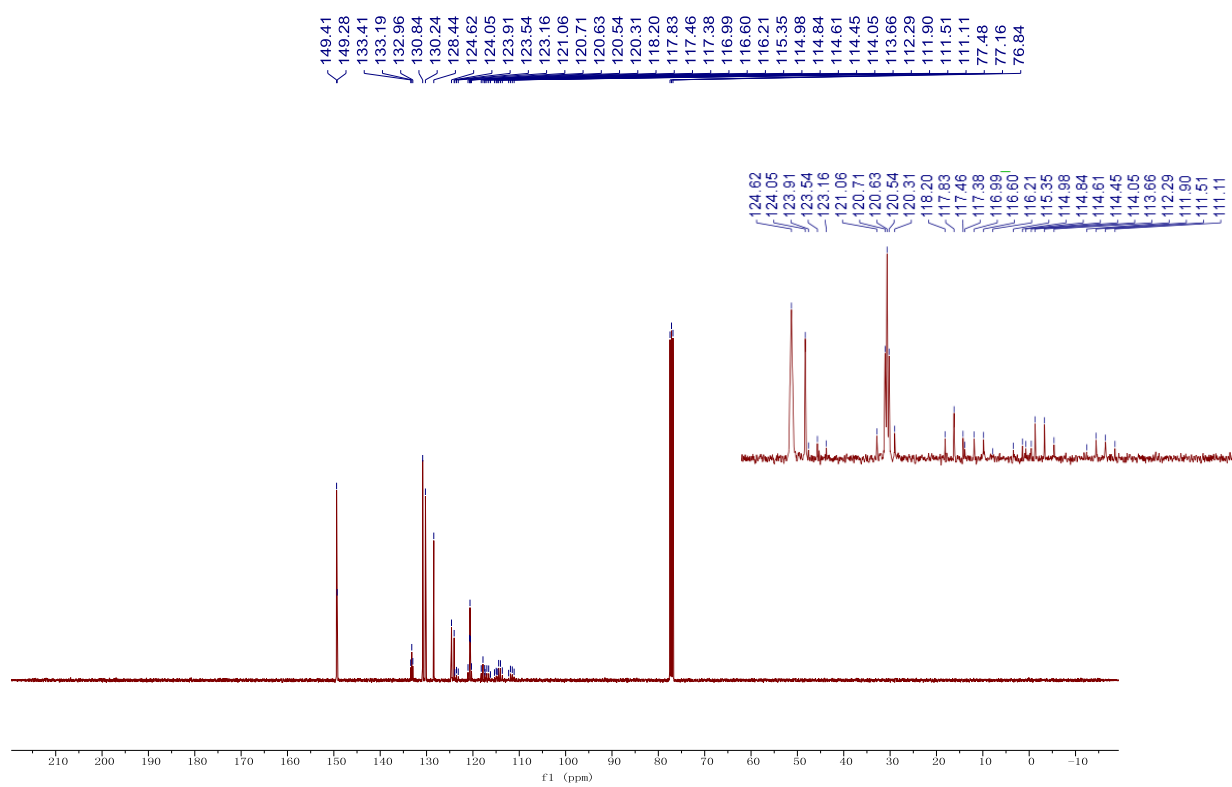

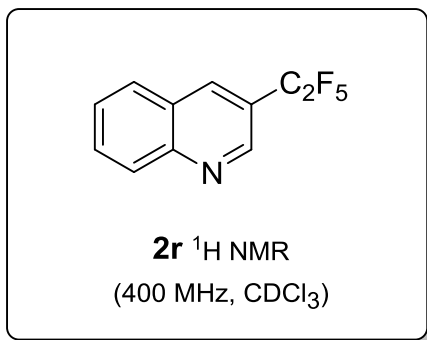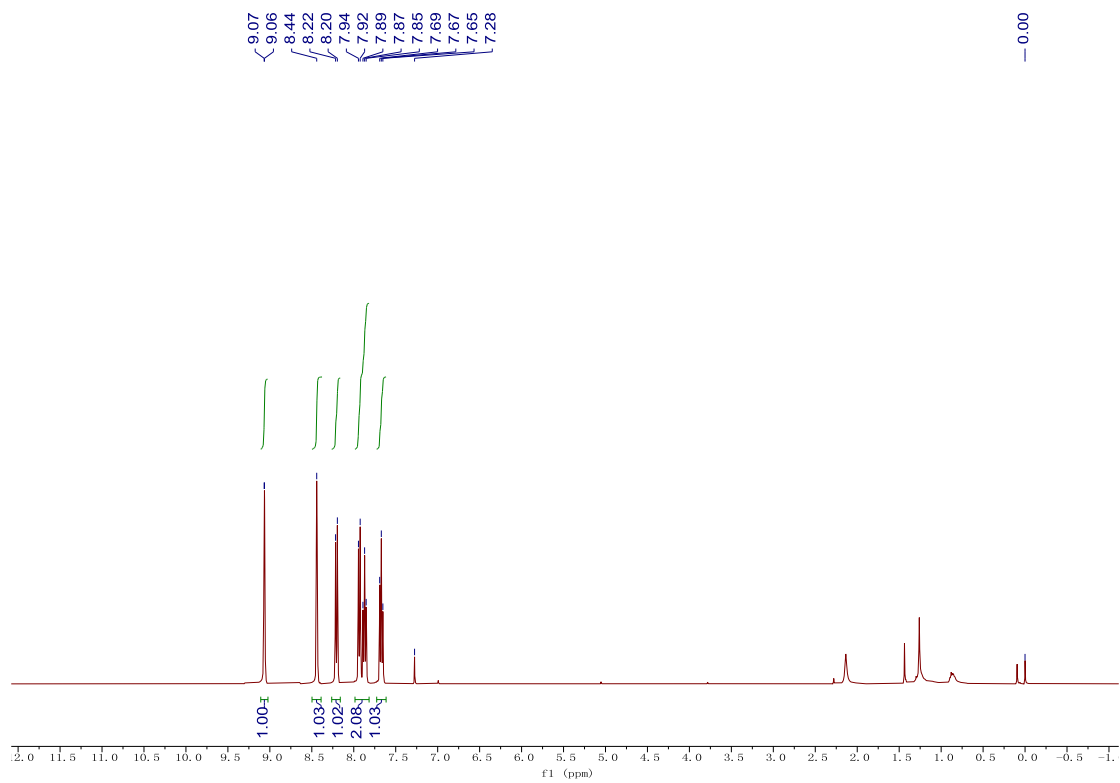

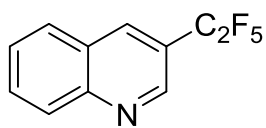

**2r**  $^{19}\text{F}$  NMR  
(376 MHz,  $\text{CDCl}_3$ )

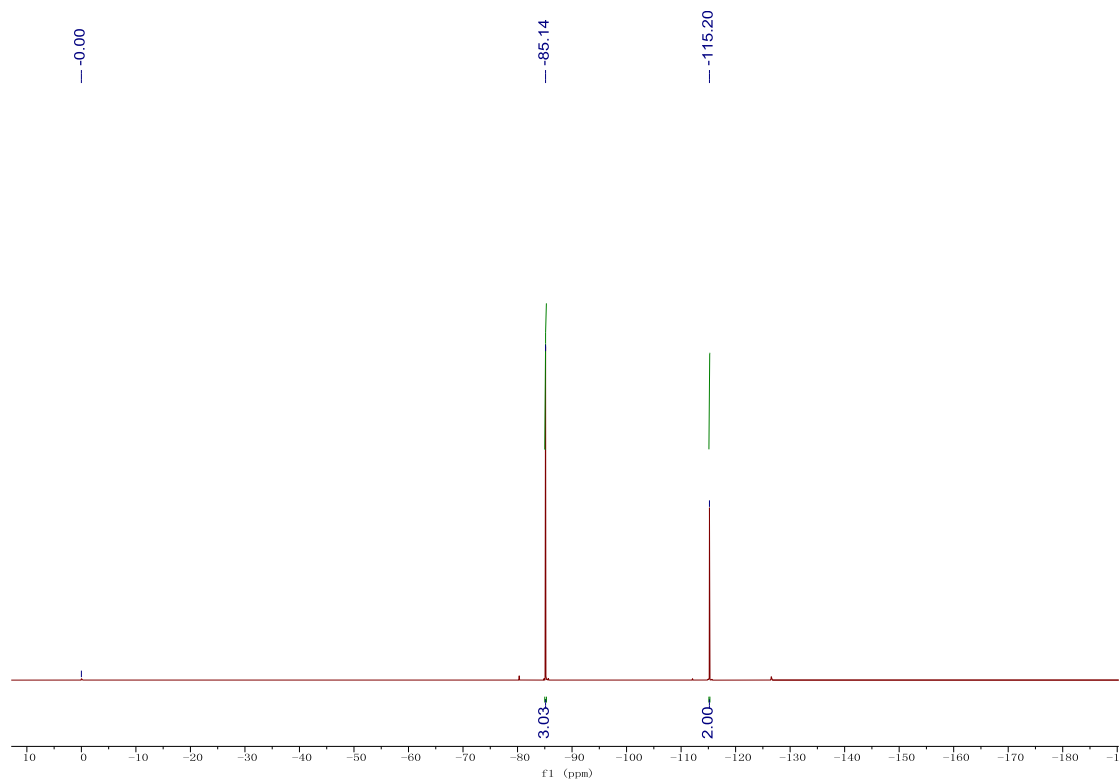

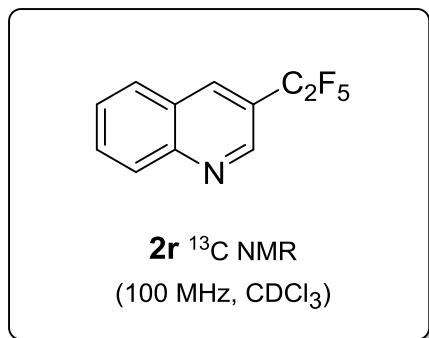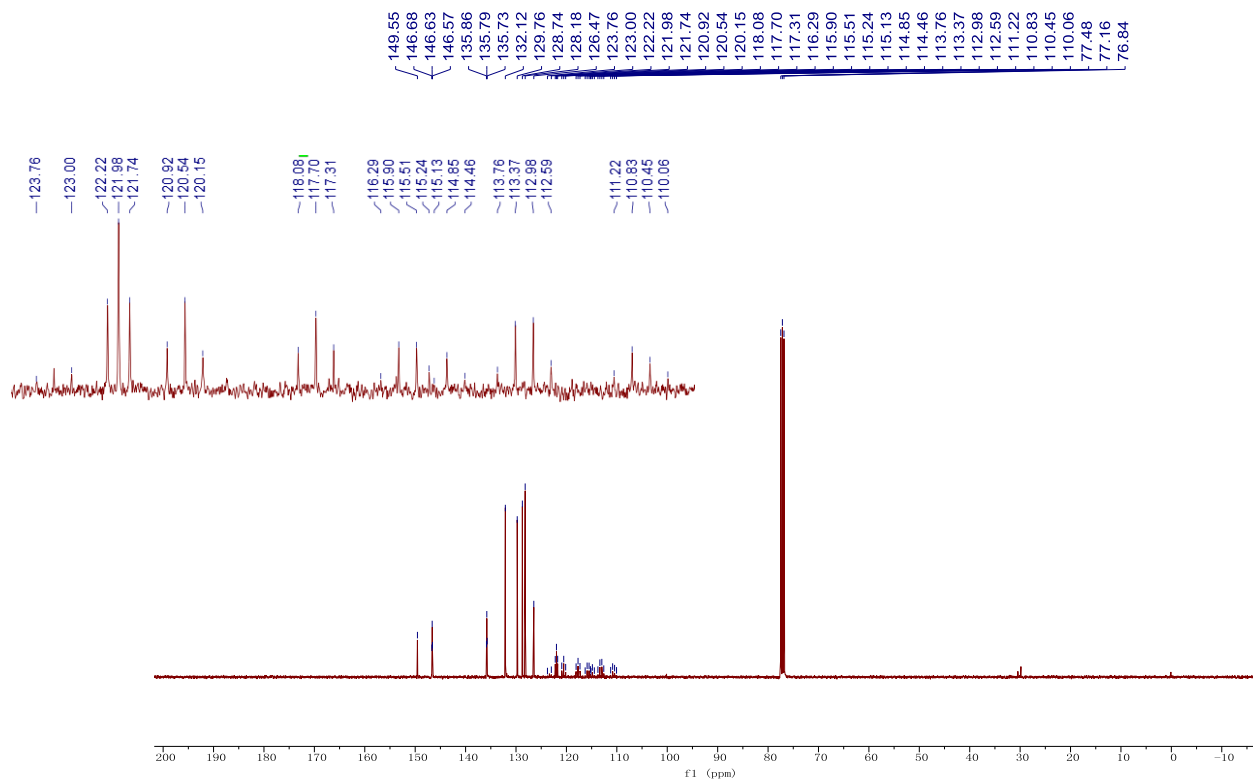

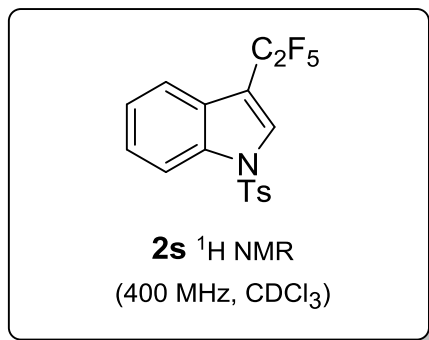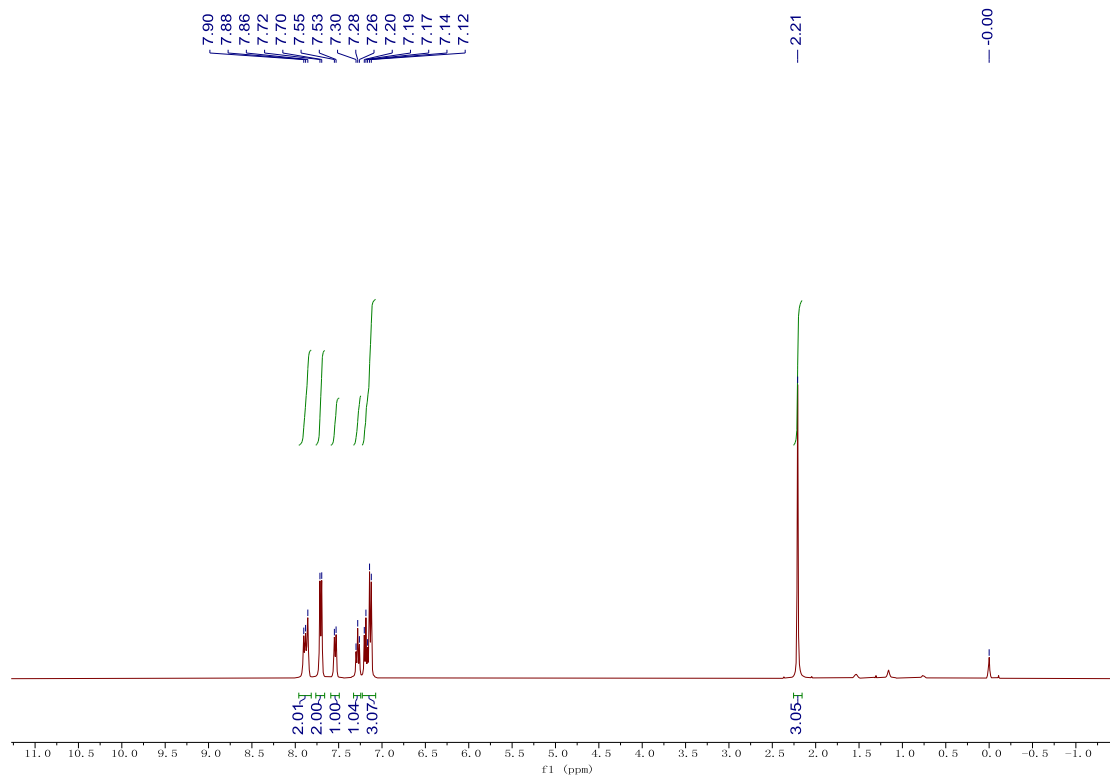



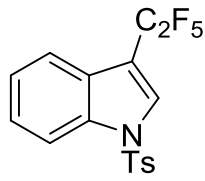

**2s**  $^{19}F$  NMR  
(376 MHz,  $CDCl_3$ )

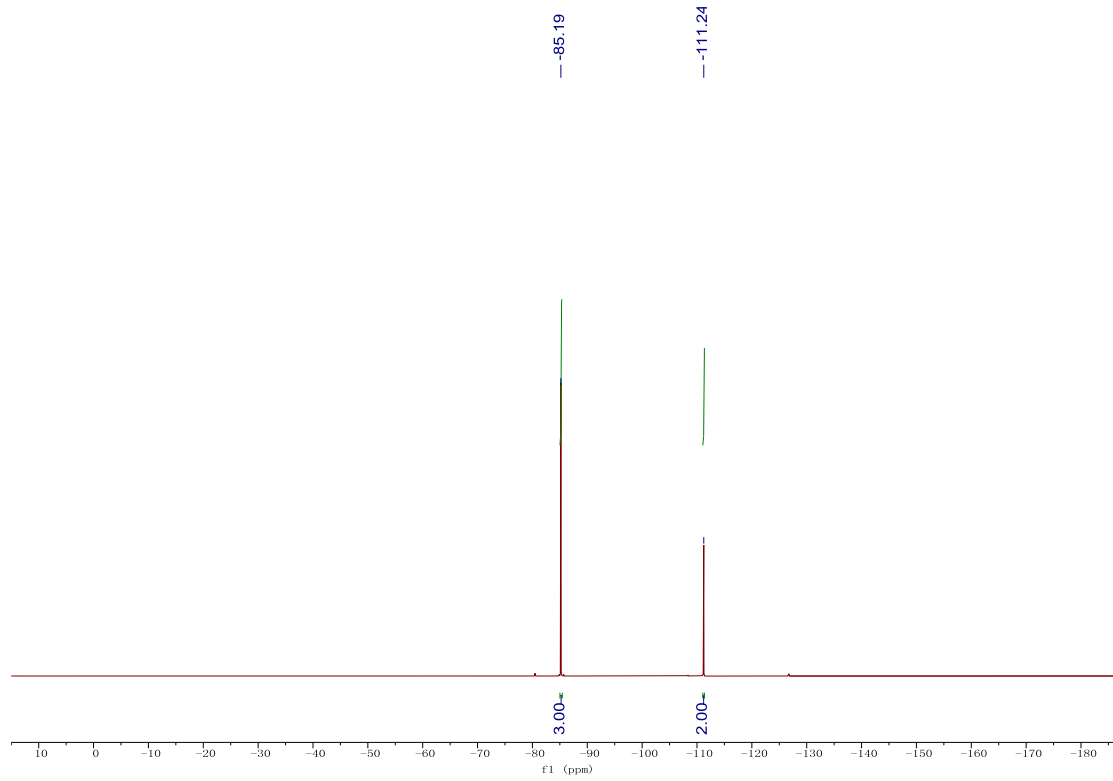

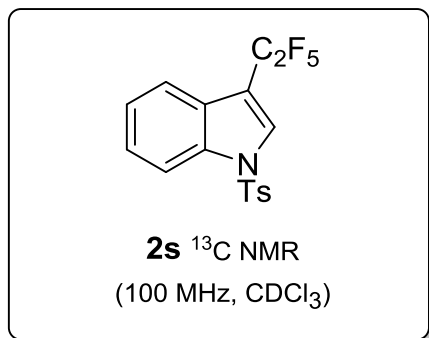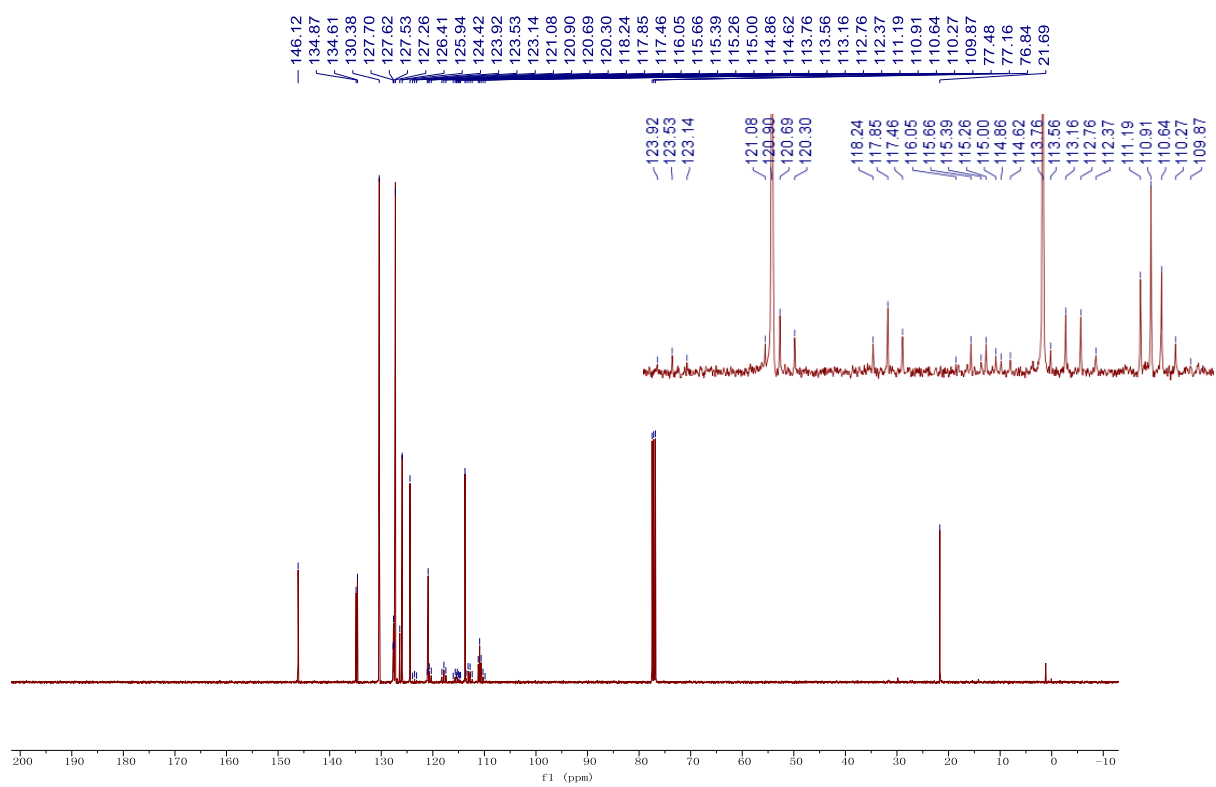

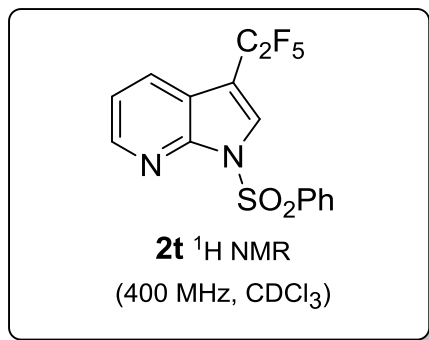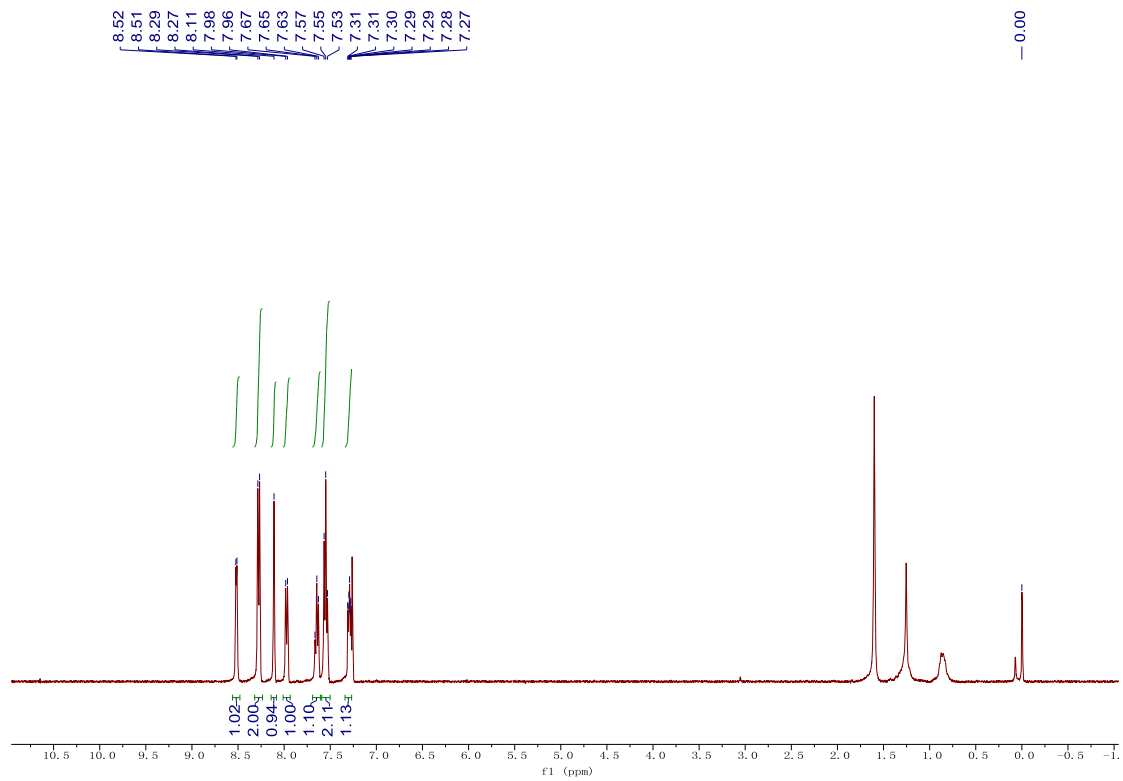

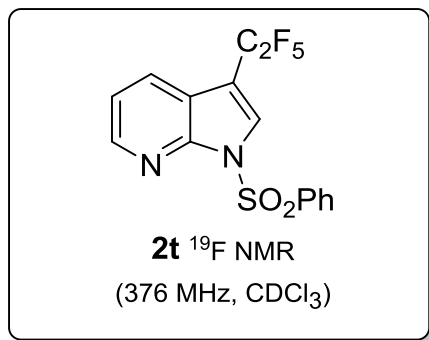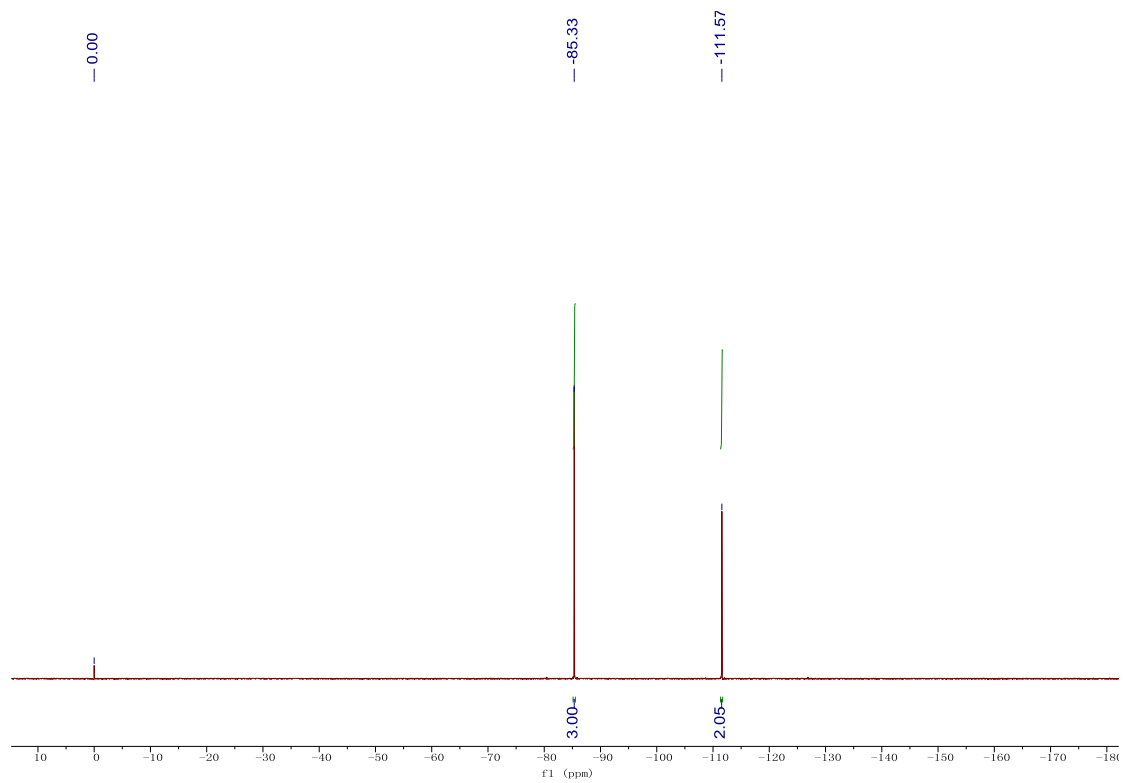

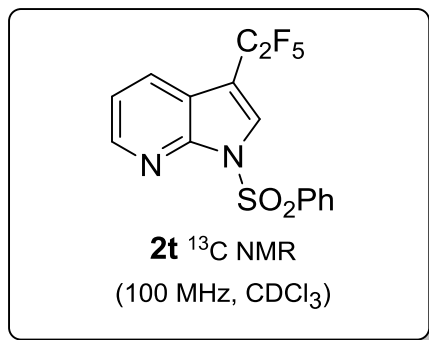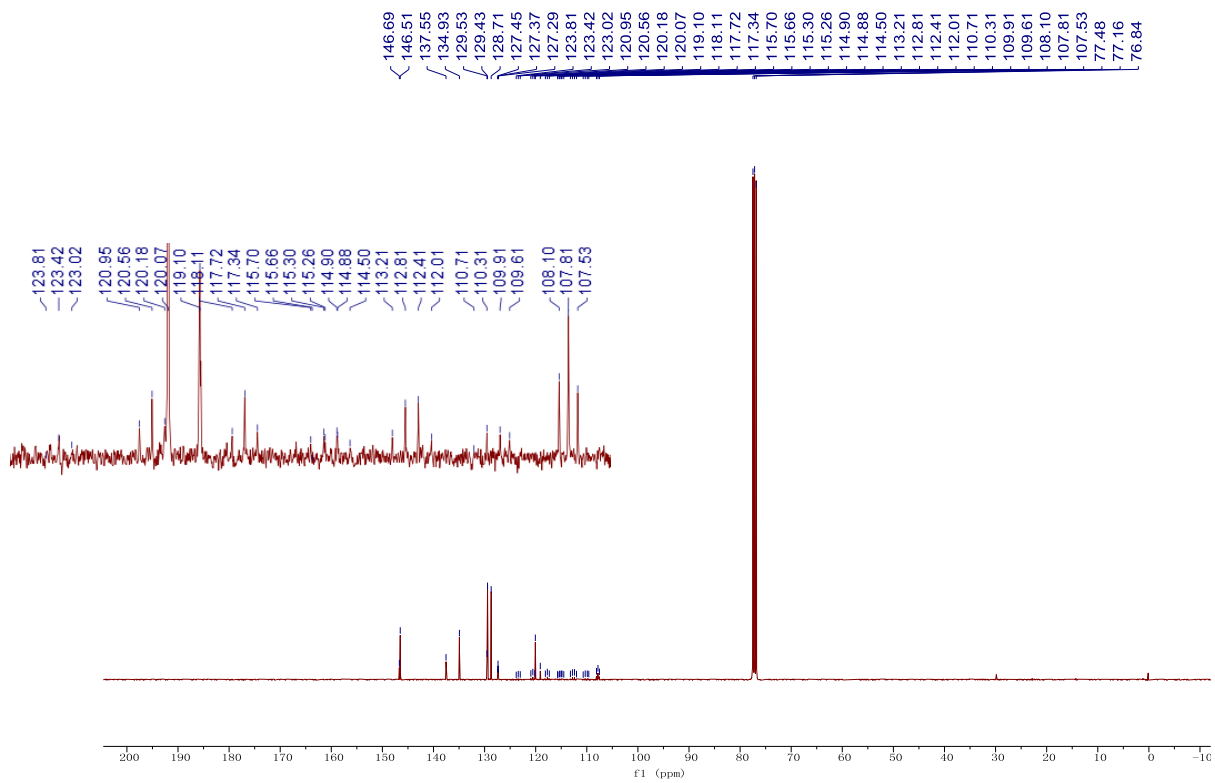

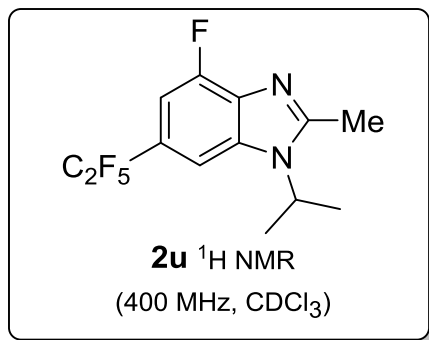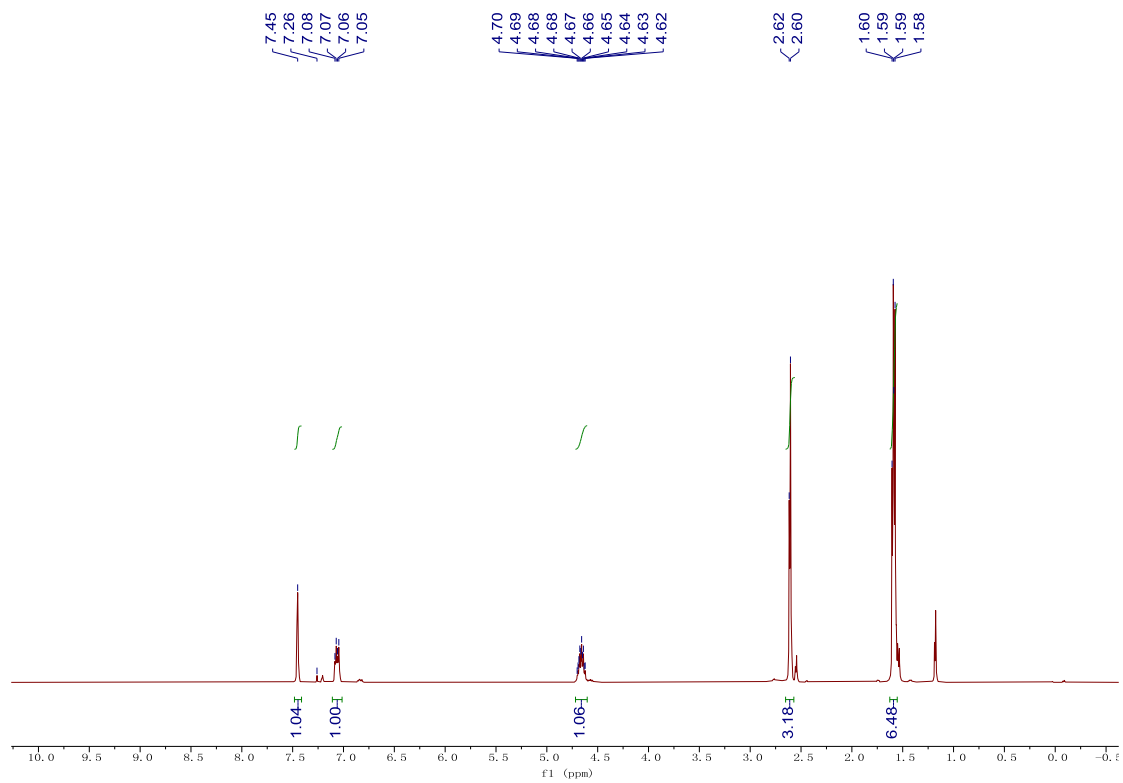

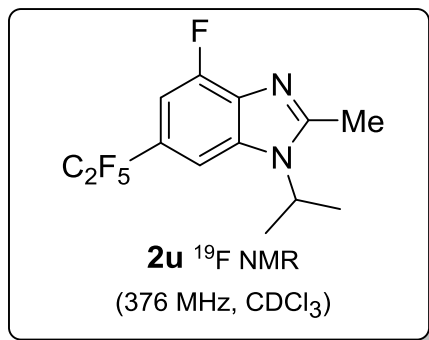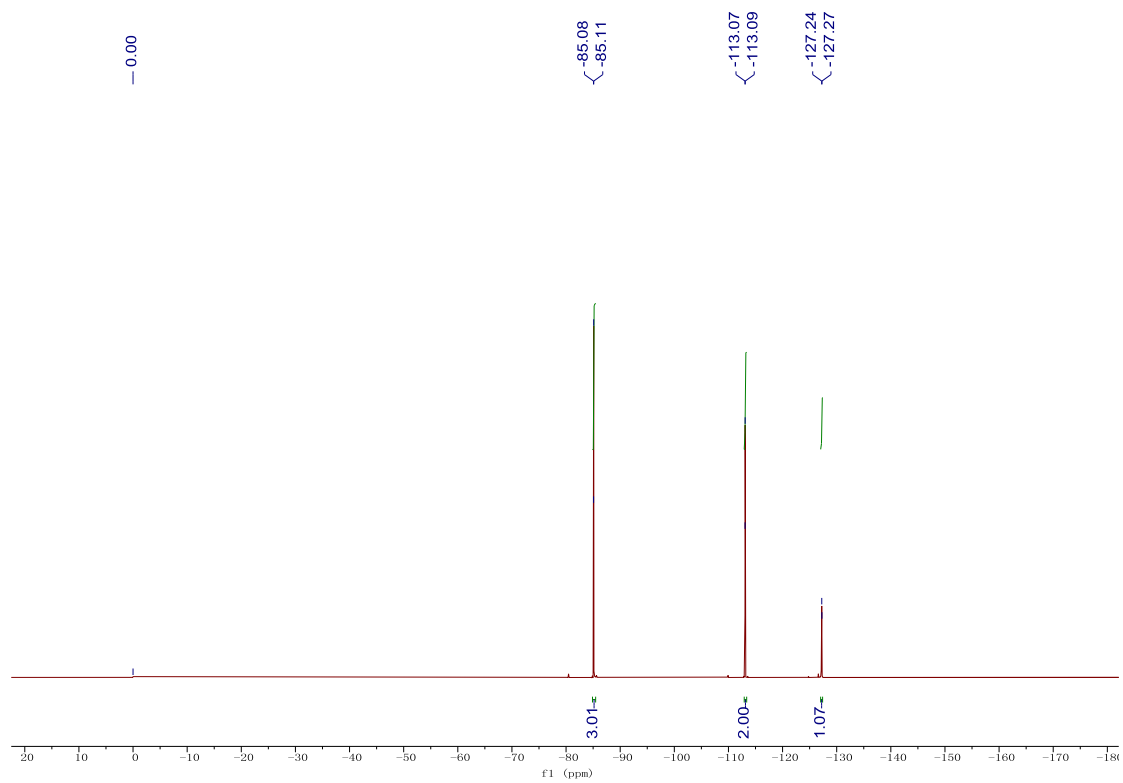

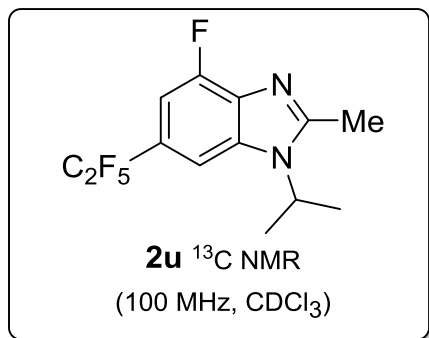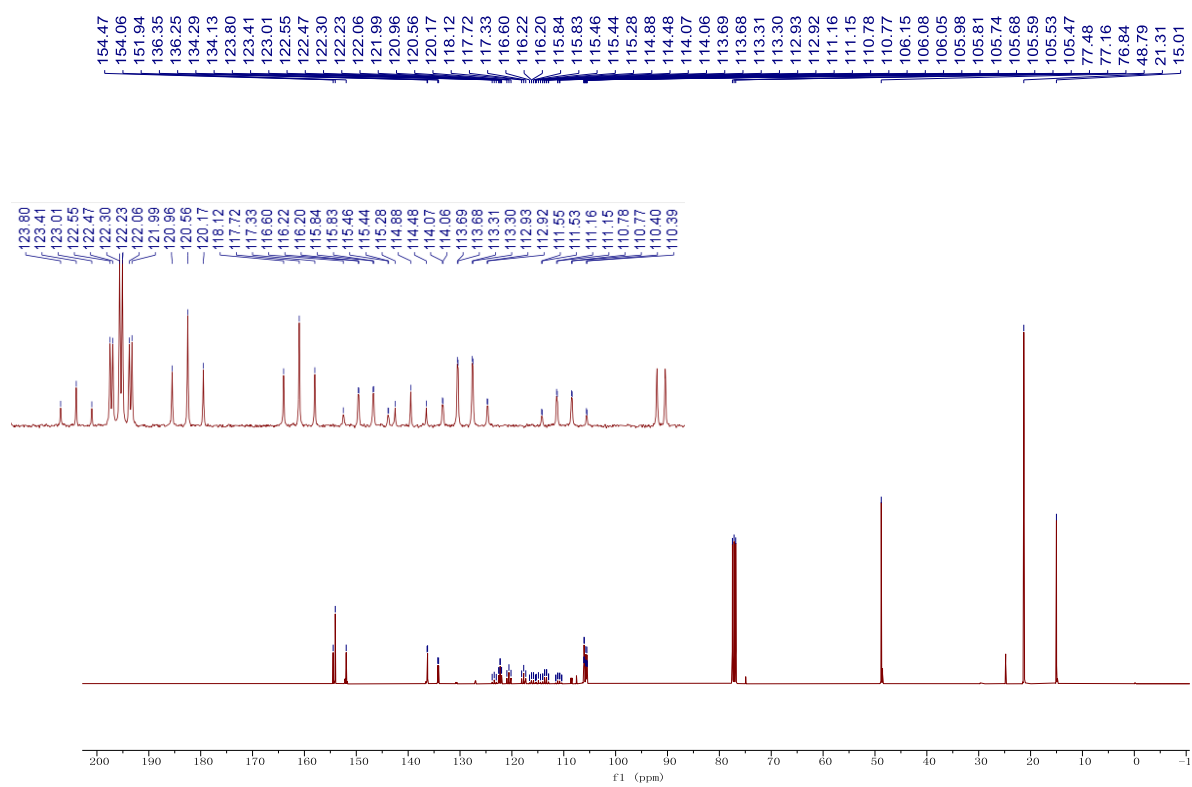



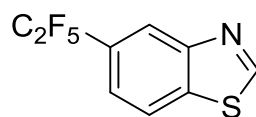

**2v**  $^1\text{H}$  NMR  
(400 MHz,  $\text{CDCl}_3$ )

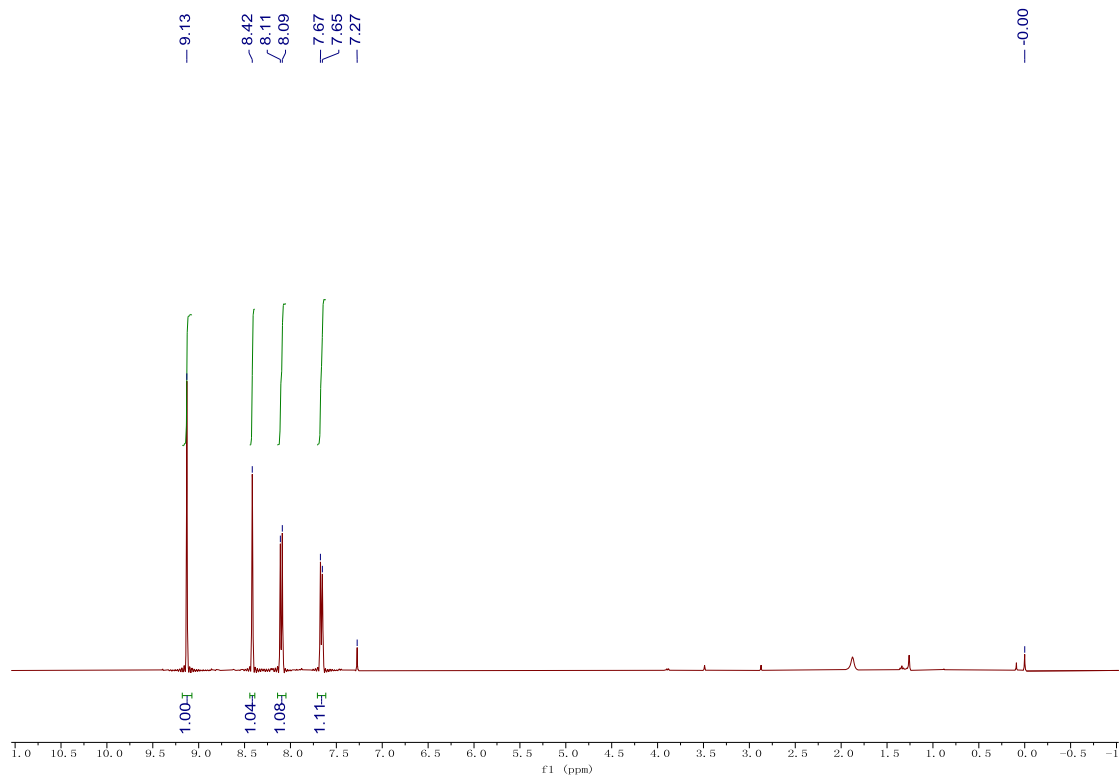

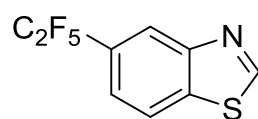

**2v**  $^{19}\text{F}$  NMR  
(376 MHz,  $\text{CDCl}_3$ )

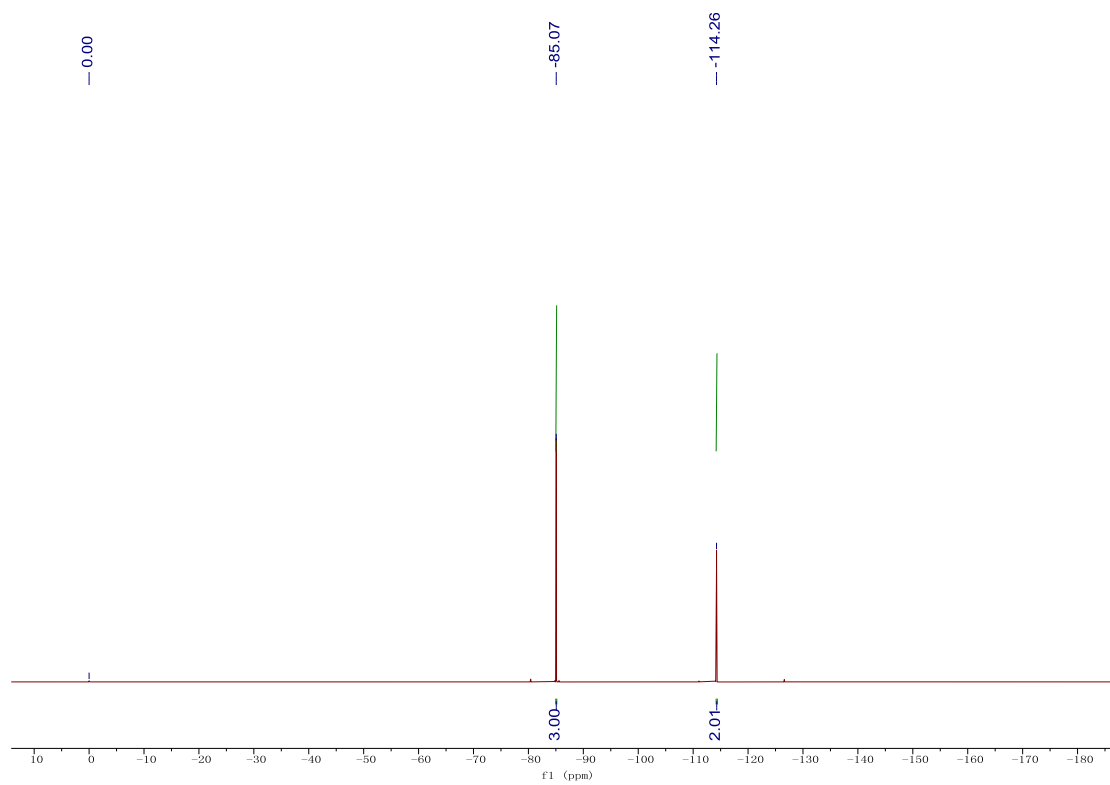

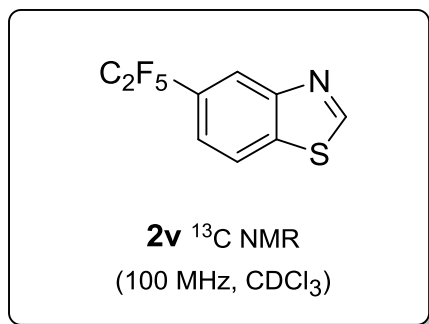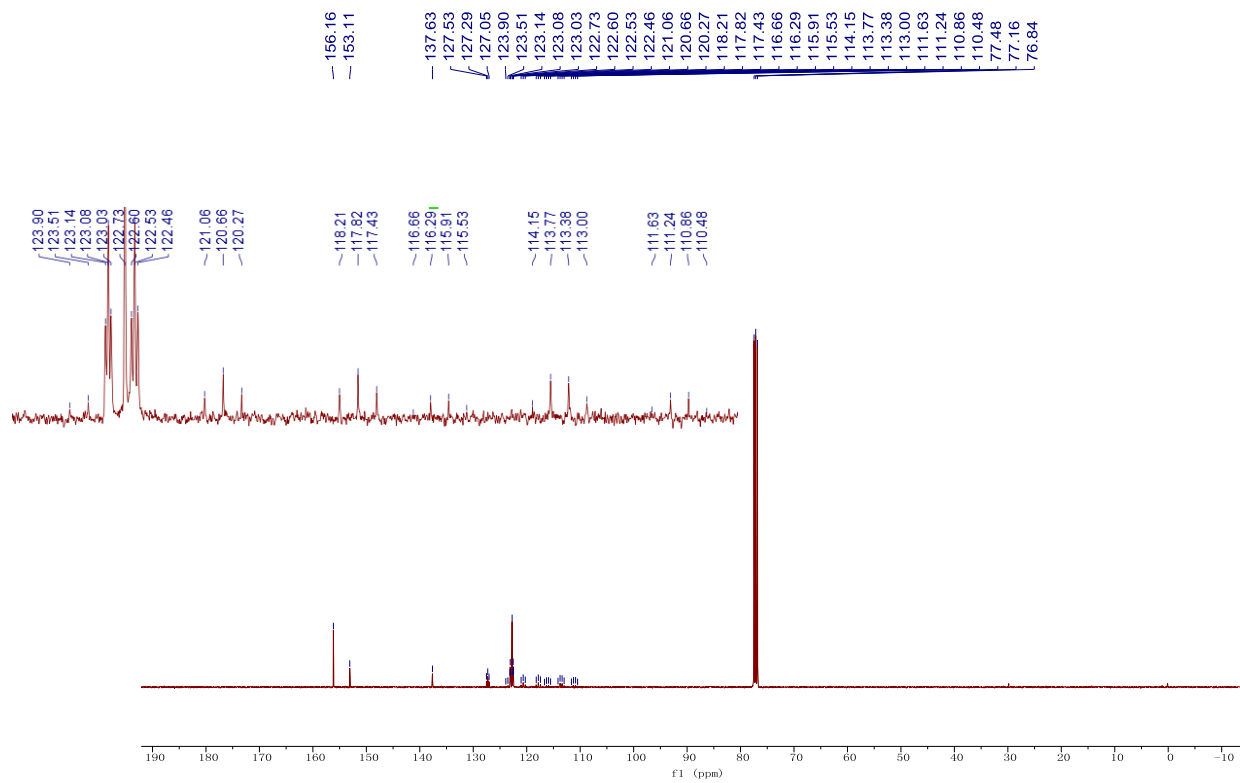

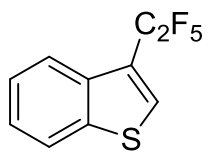

**2w**  $^1\text{H}$  NMR  
(400 MHz,  $\text{CDCl}_3$ )

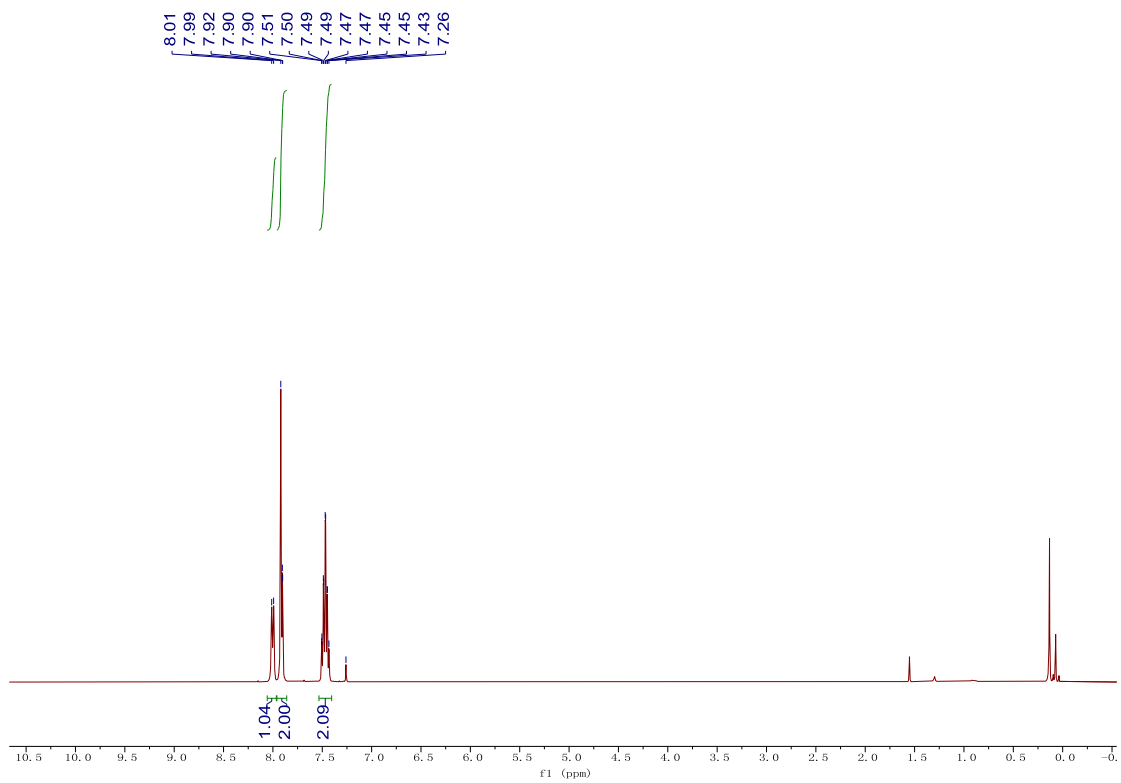



**2w**  $^{19}\text{F}$  NMR  
(376 MHz,  $\text{CDCl}_3$ )

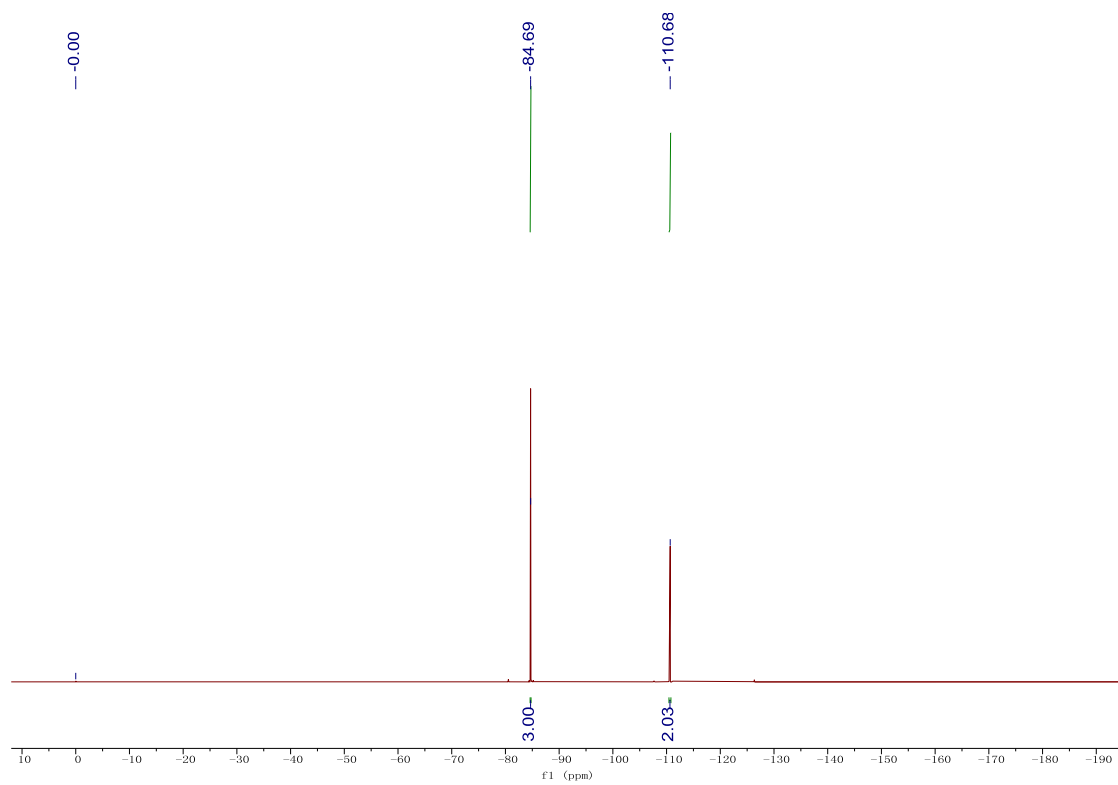

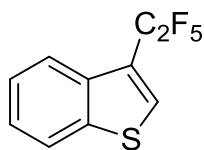

**2w**  $^{13}\text{C}$  NMR  
(100 MHz,  $\text{CDCl}_3$ )

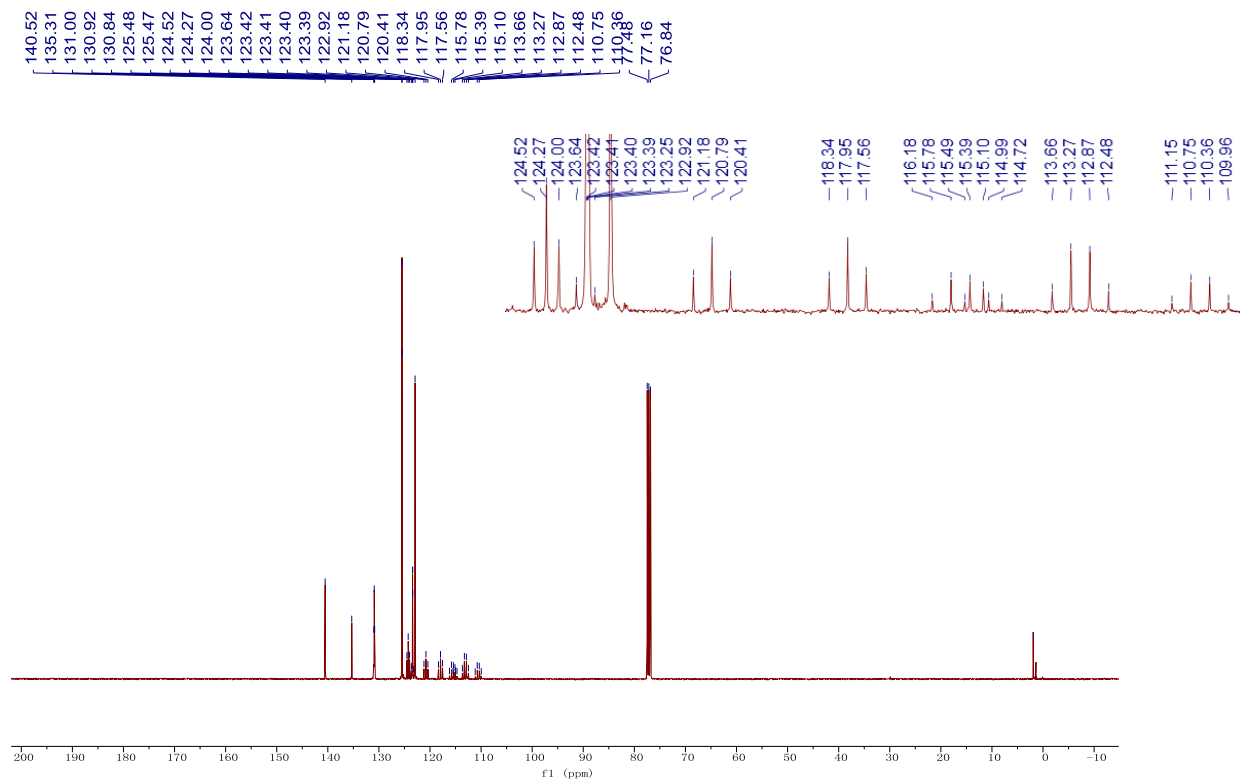

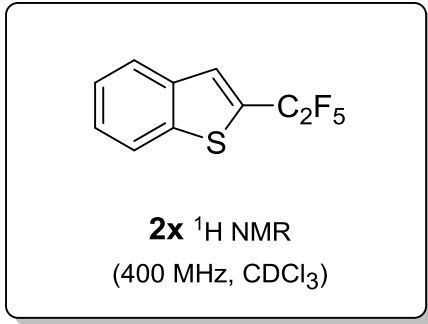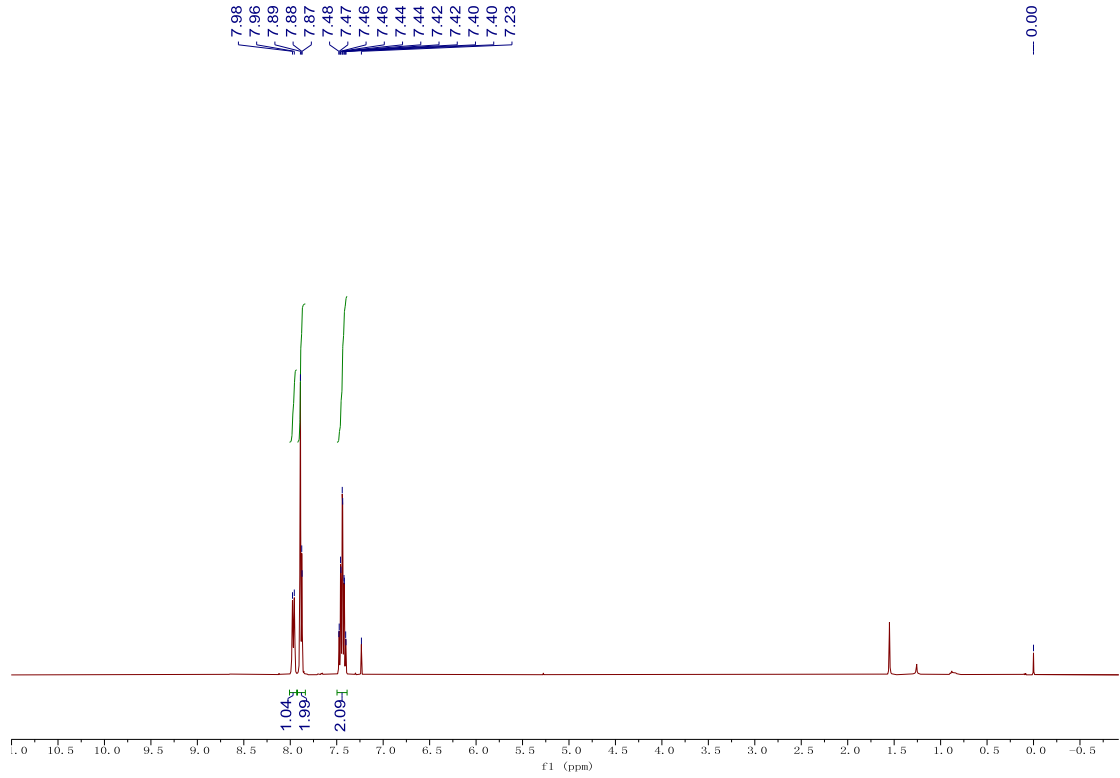

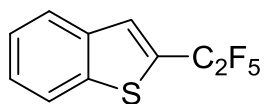

**2x**  $^{19}\text{F}$  NMR  
(376 MHz,  $\text{CDCl}_3$ )

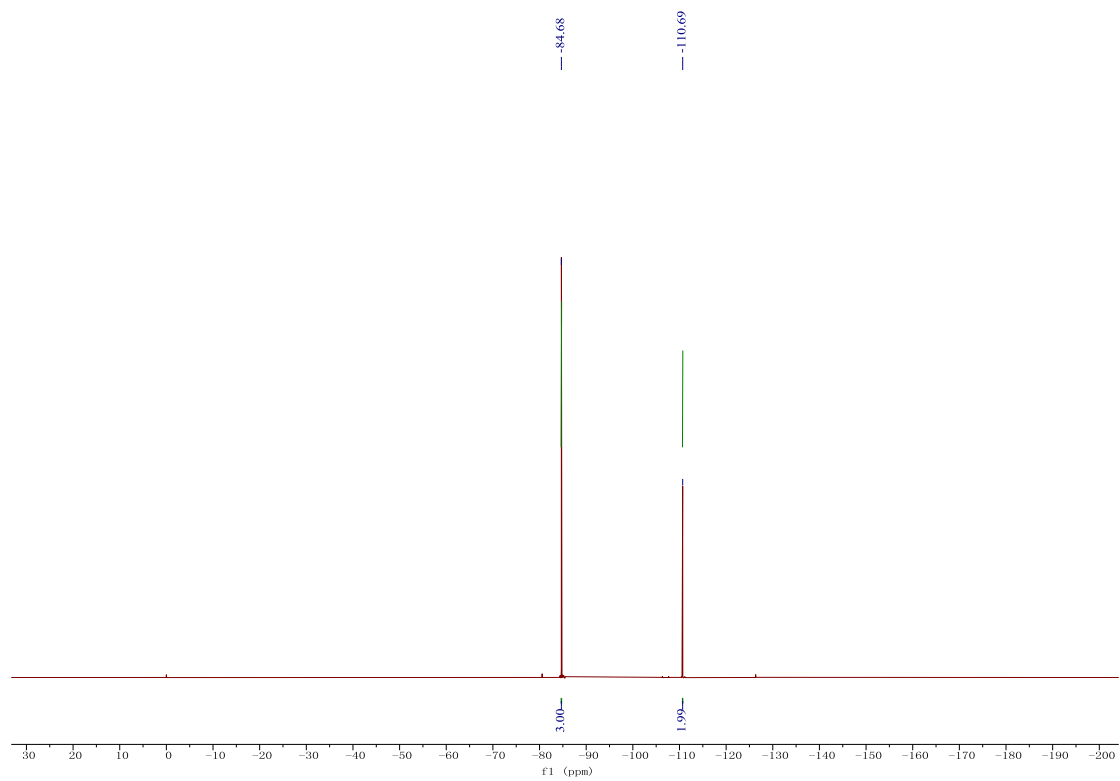



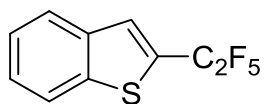

**2x**  $^{13}\text{C}$  NMR  
(100 MHz,  $\text{CDCl}_3$ )

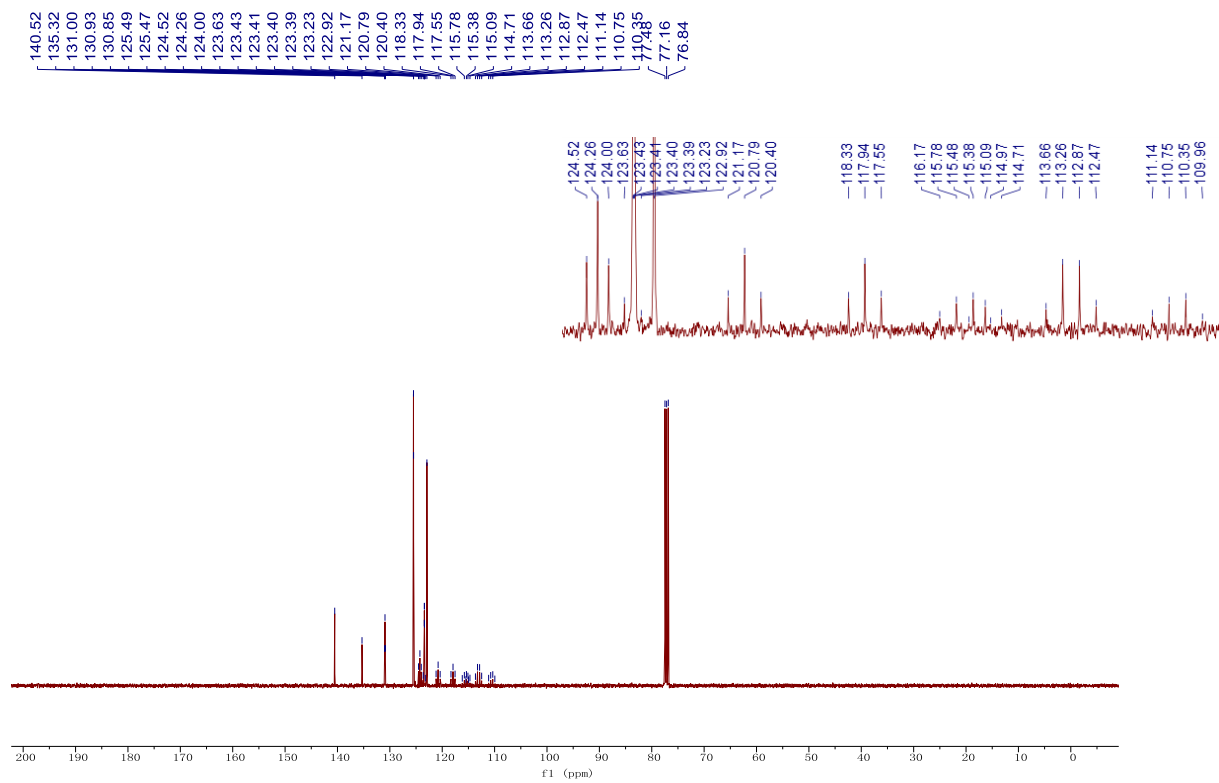

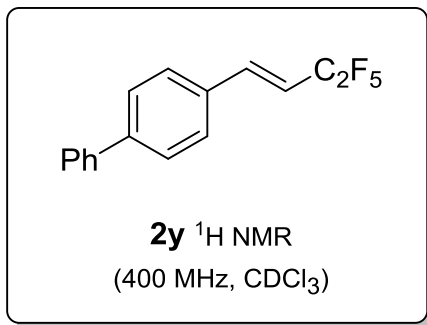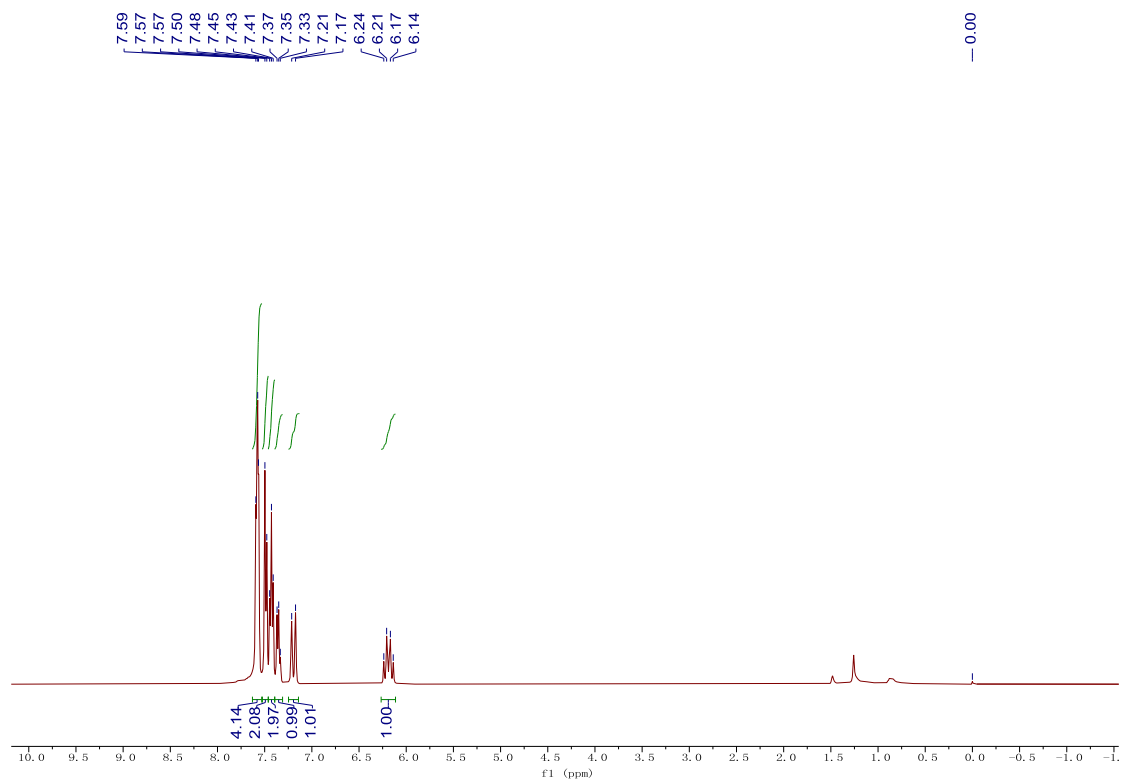

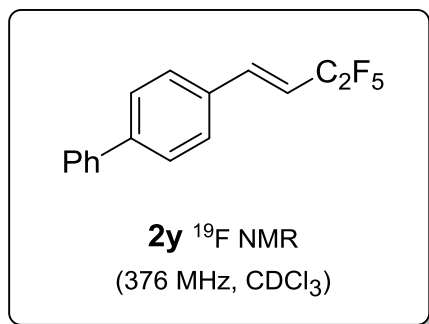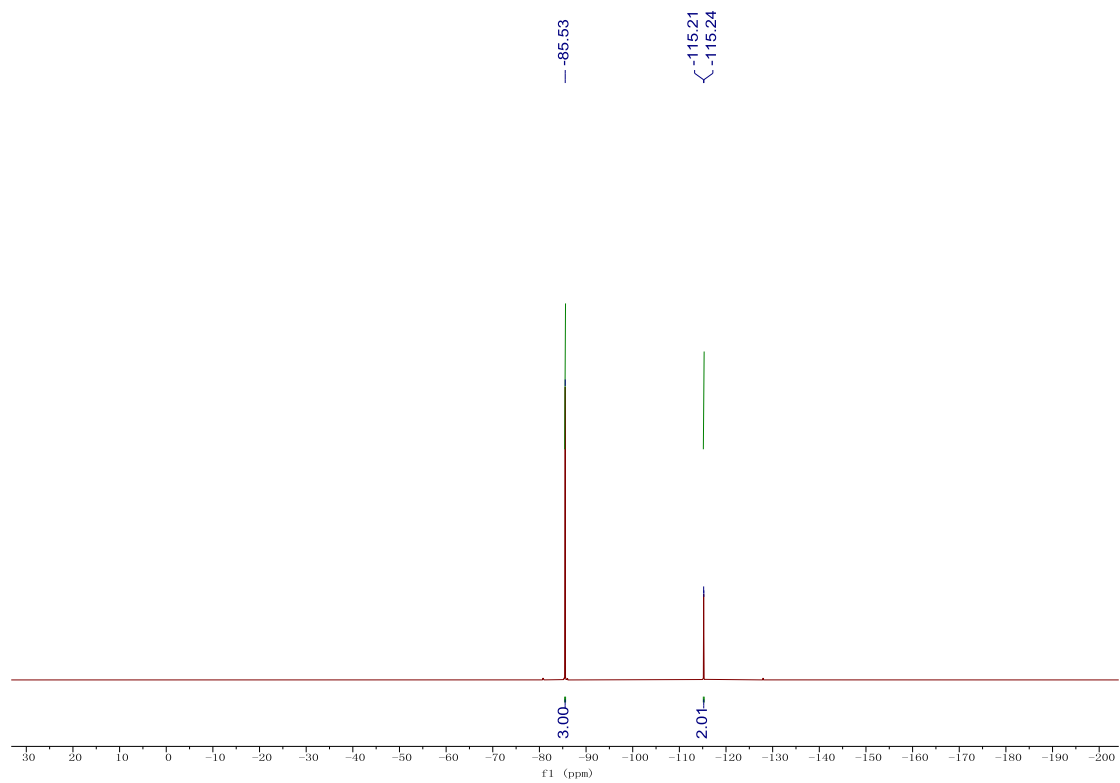

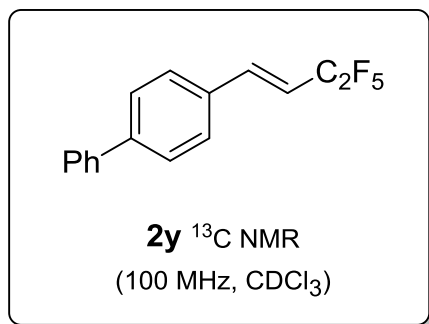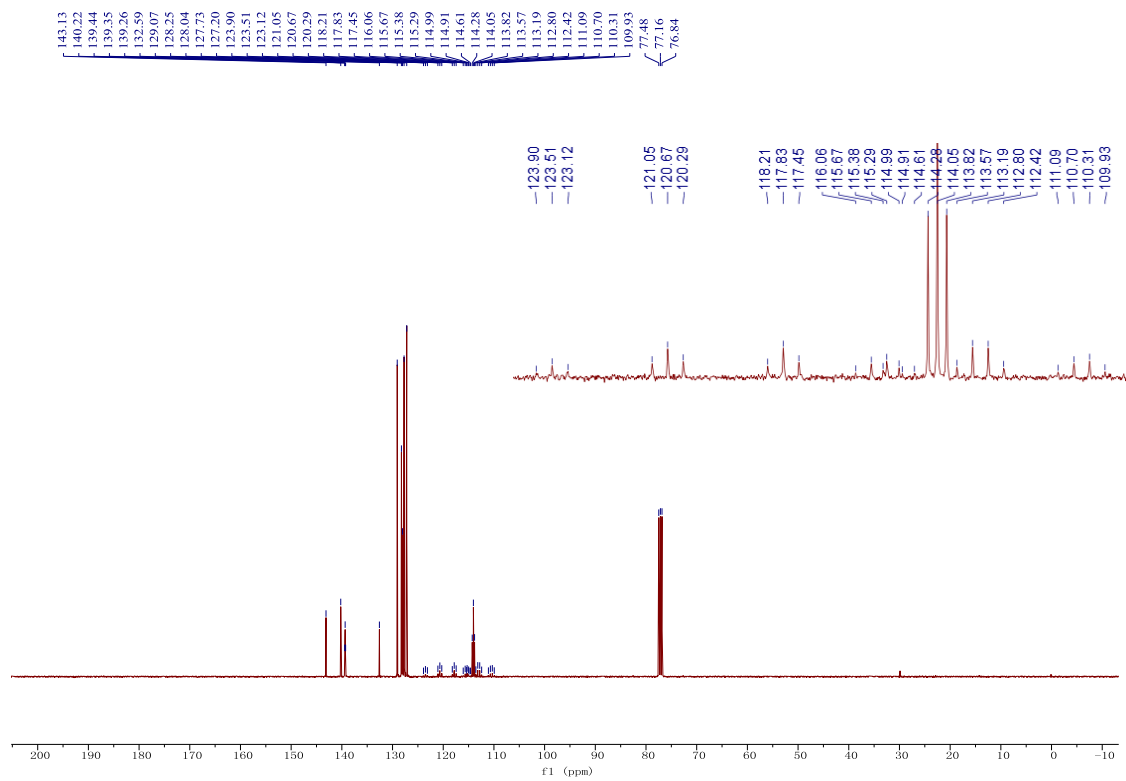

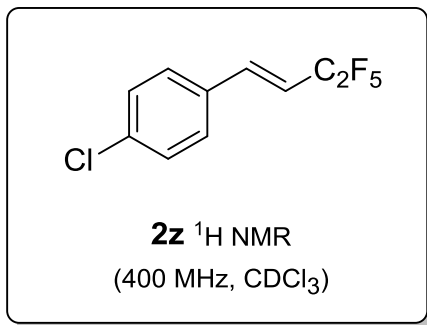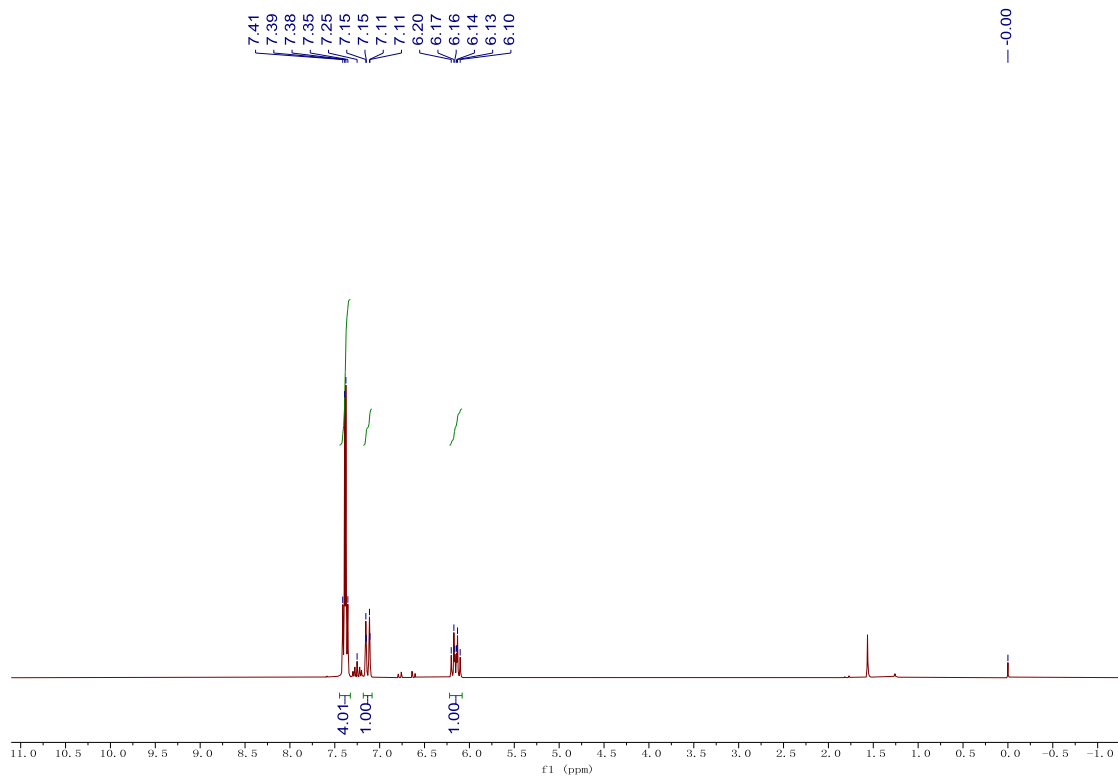

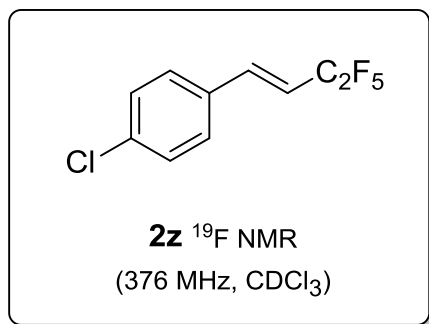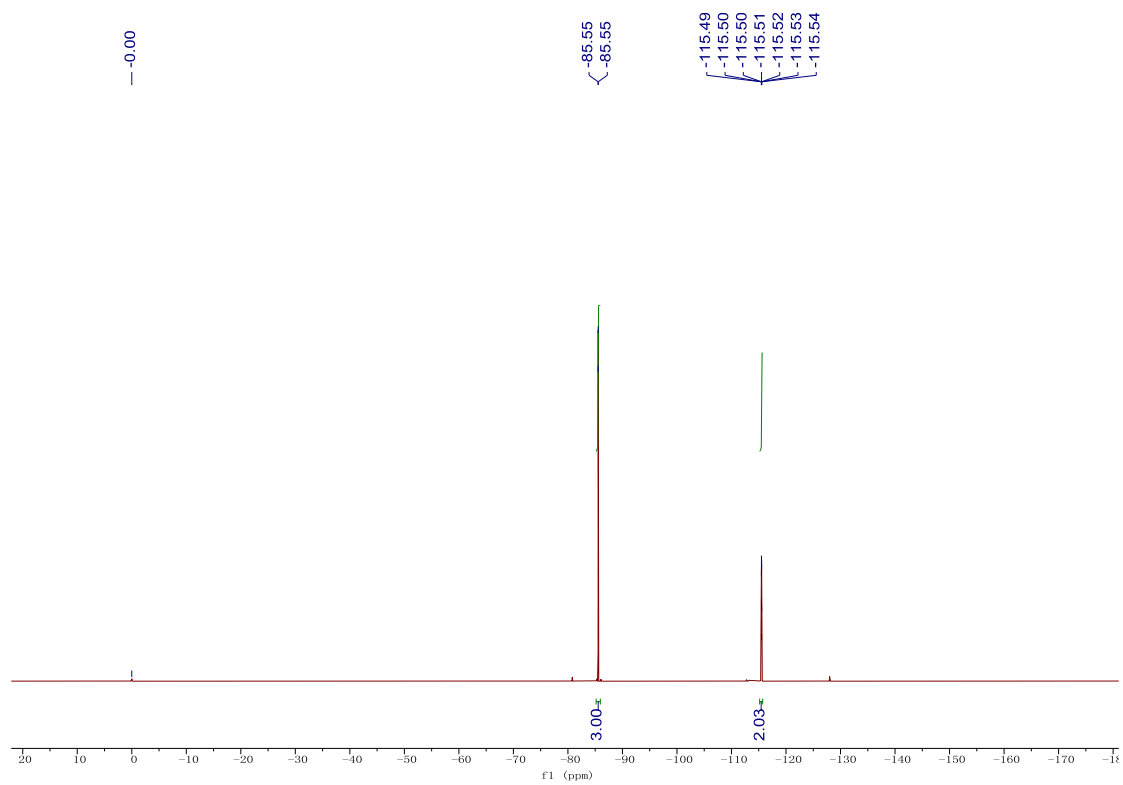

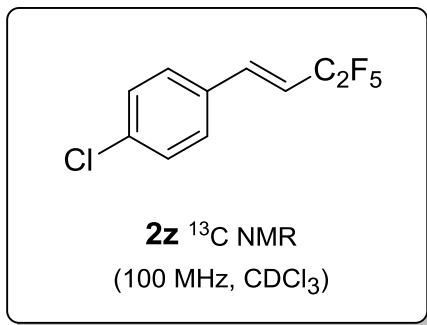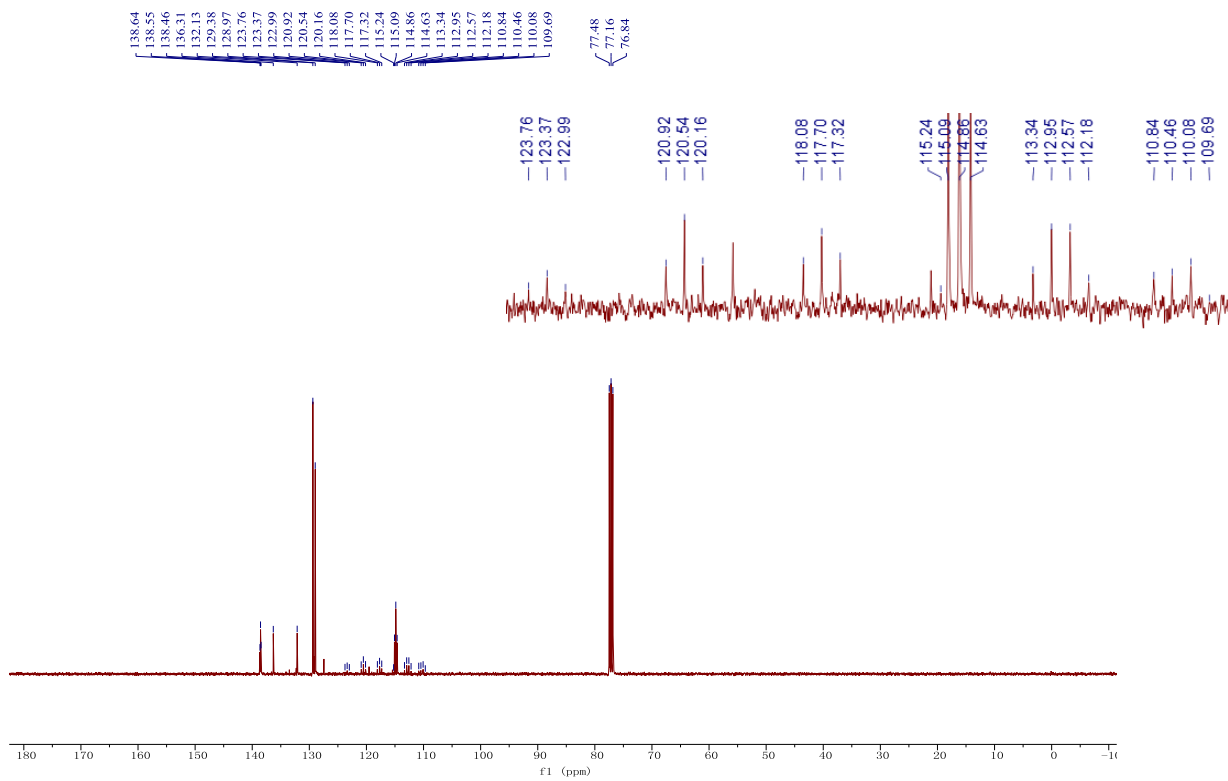

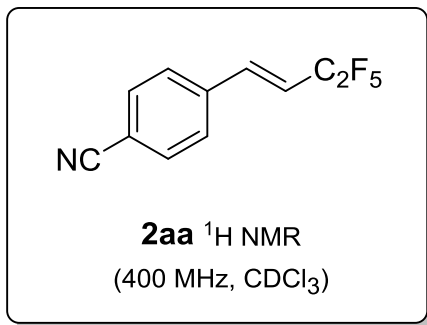

7.69  
7.67  
7.58  
7.56  
7.26  
7.22  
7.18  
6.35  
6.32  
6.31  
6.29  
6.28  
6.25

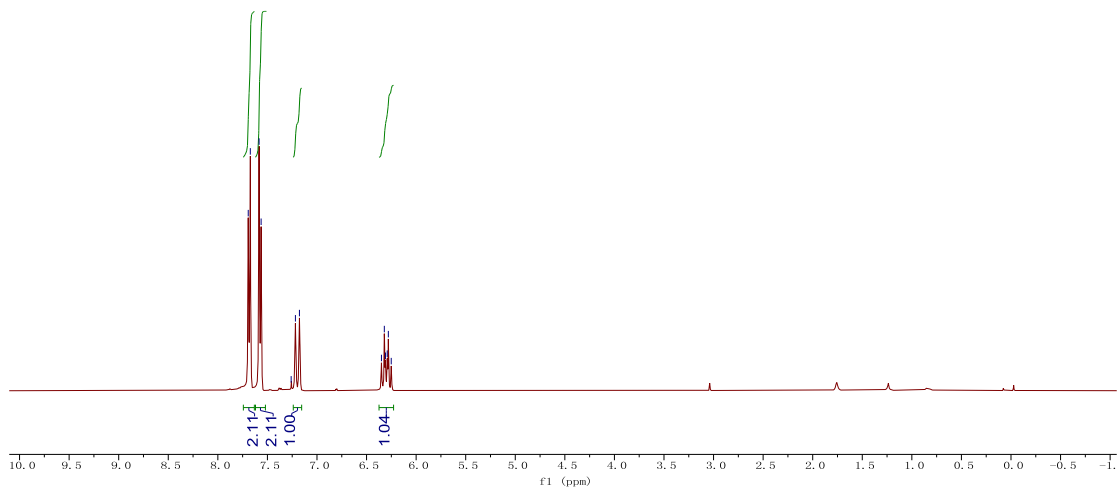



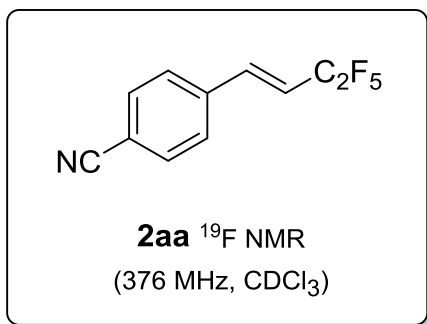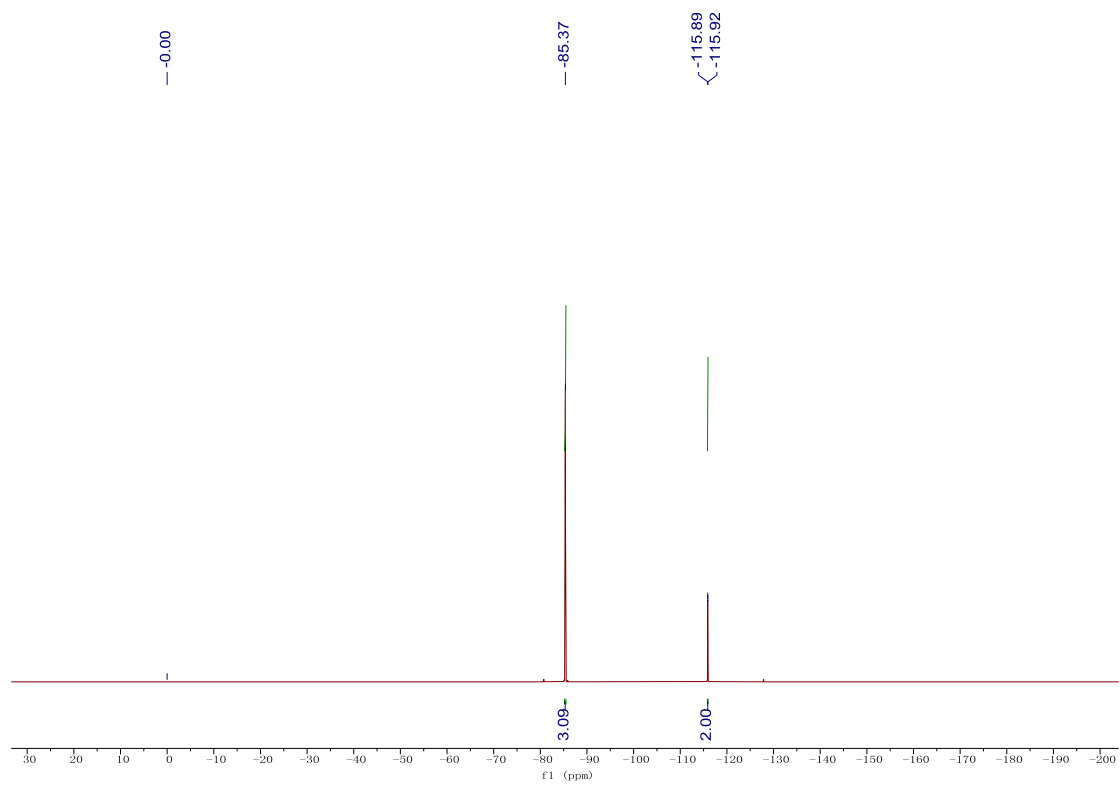

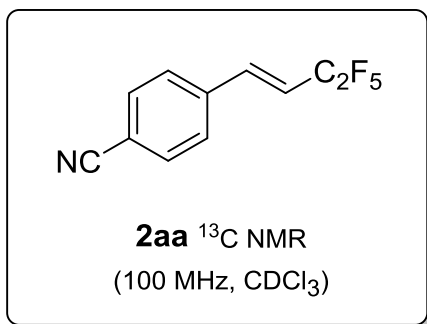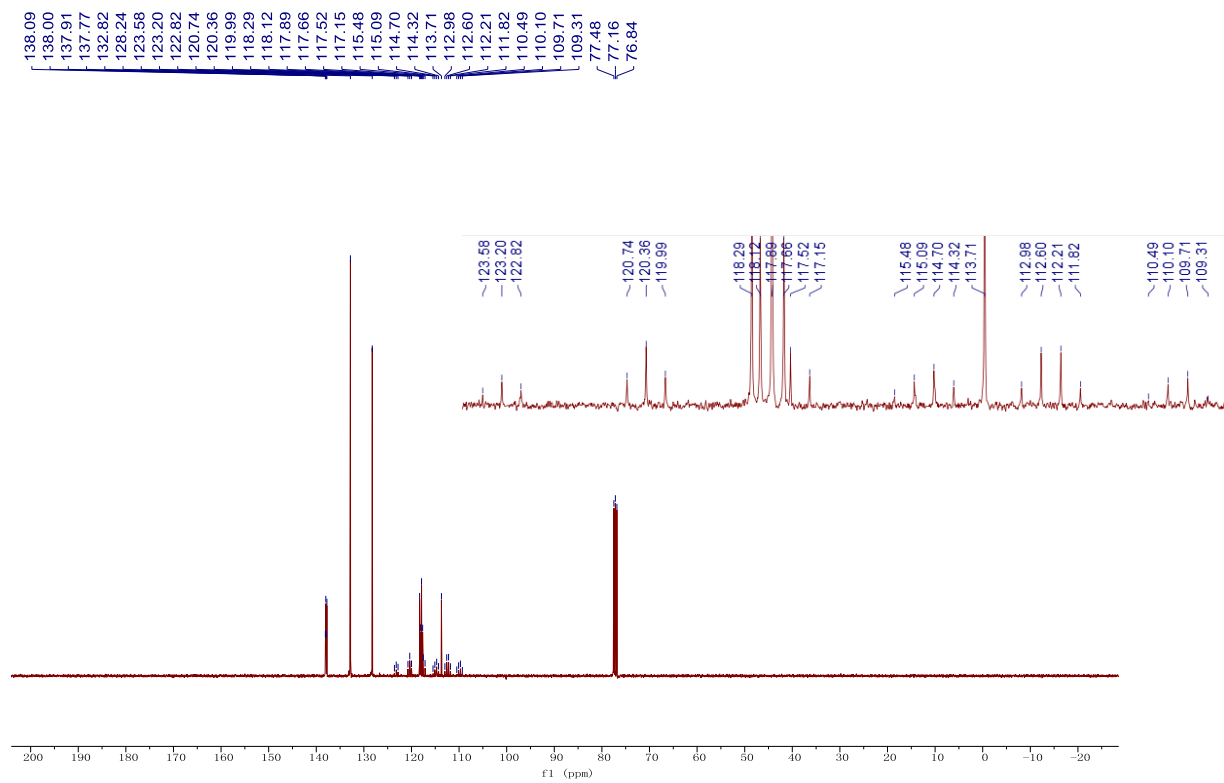

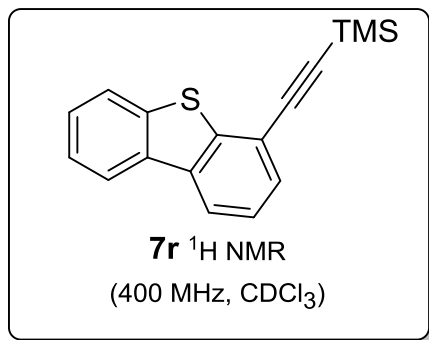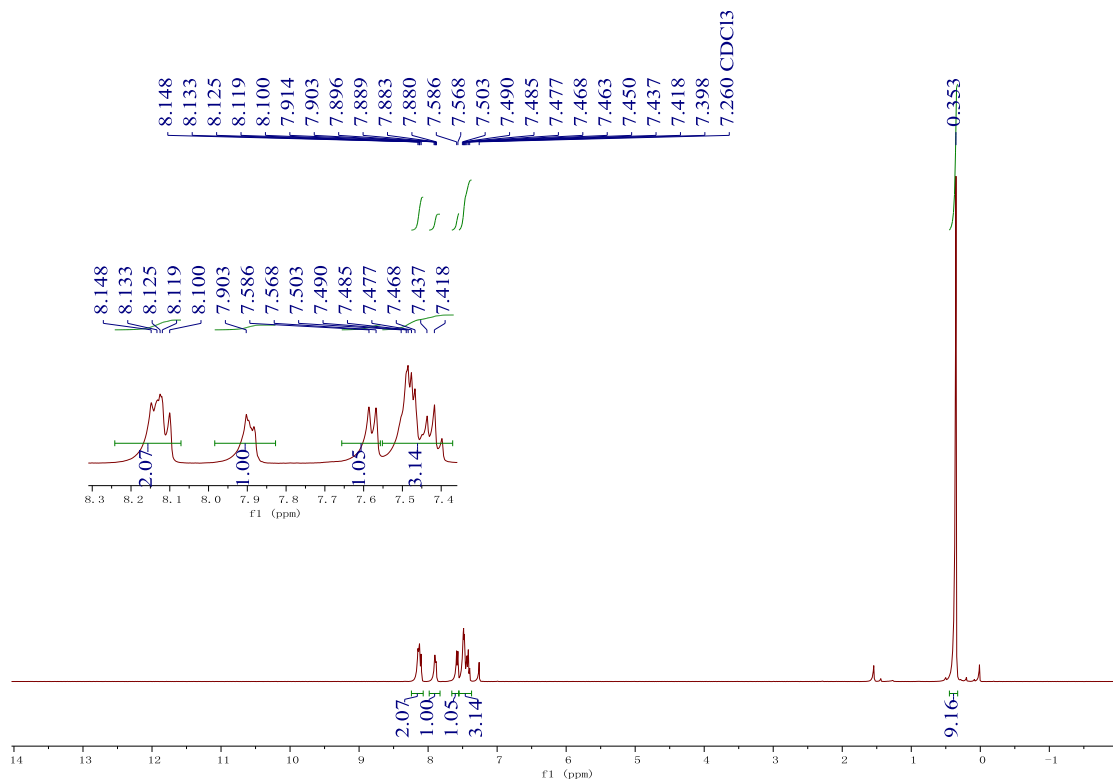

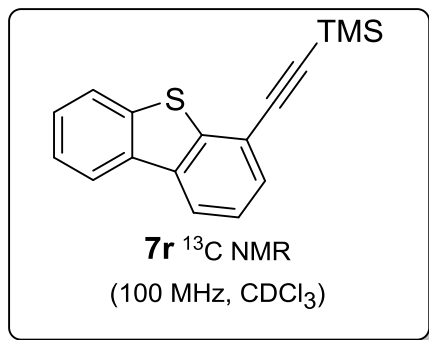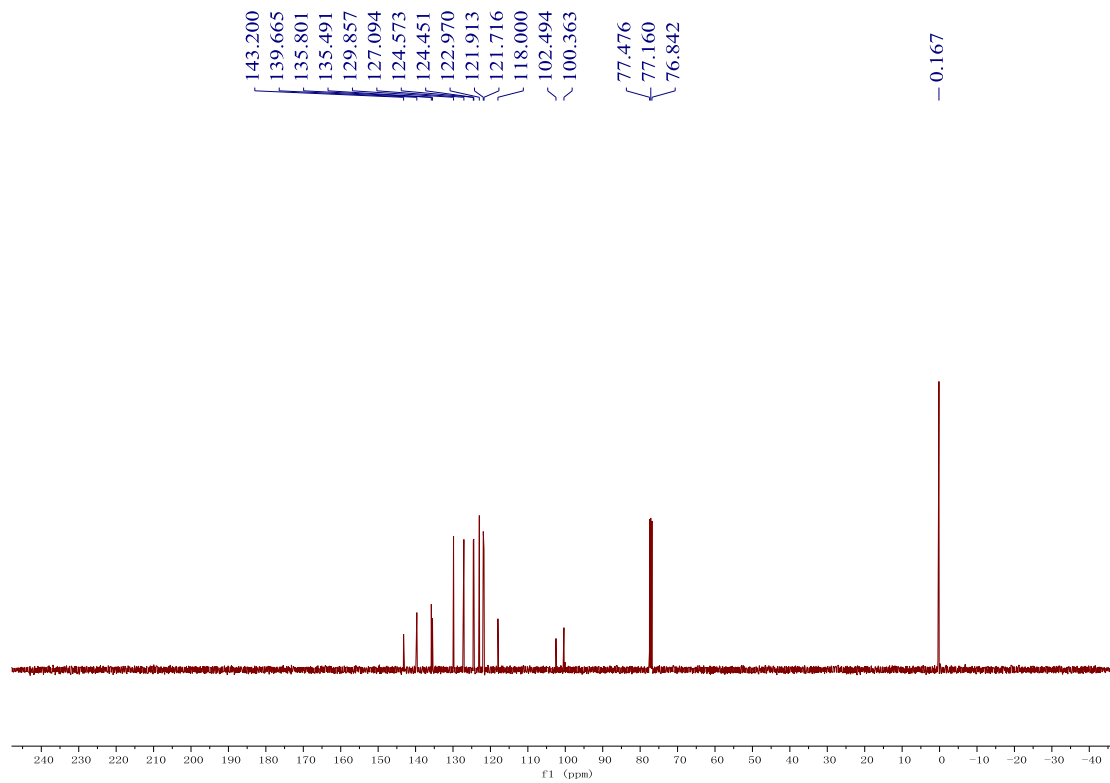

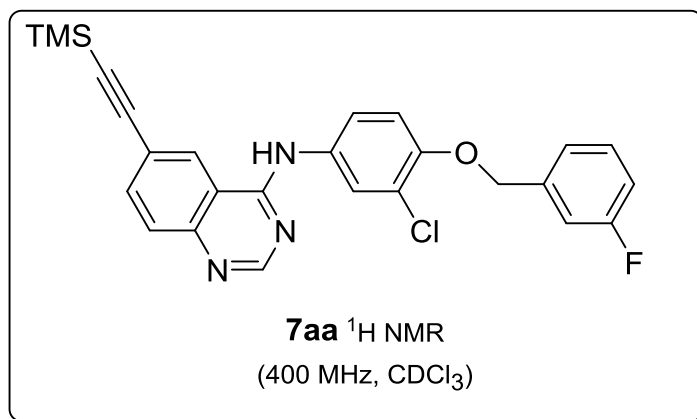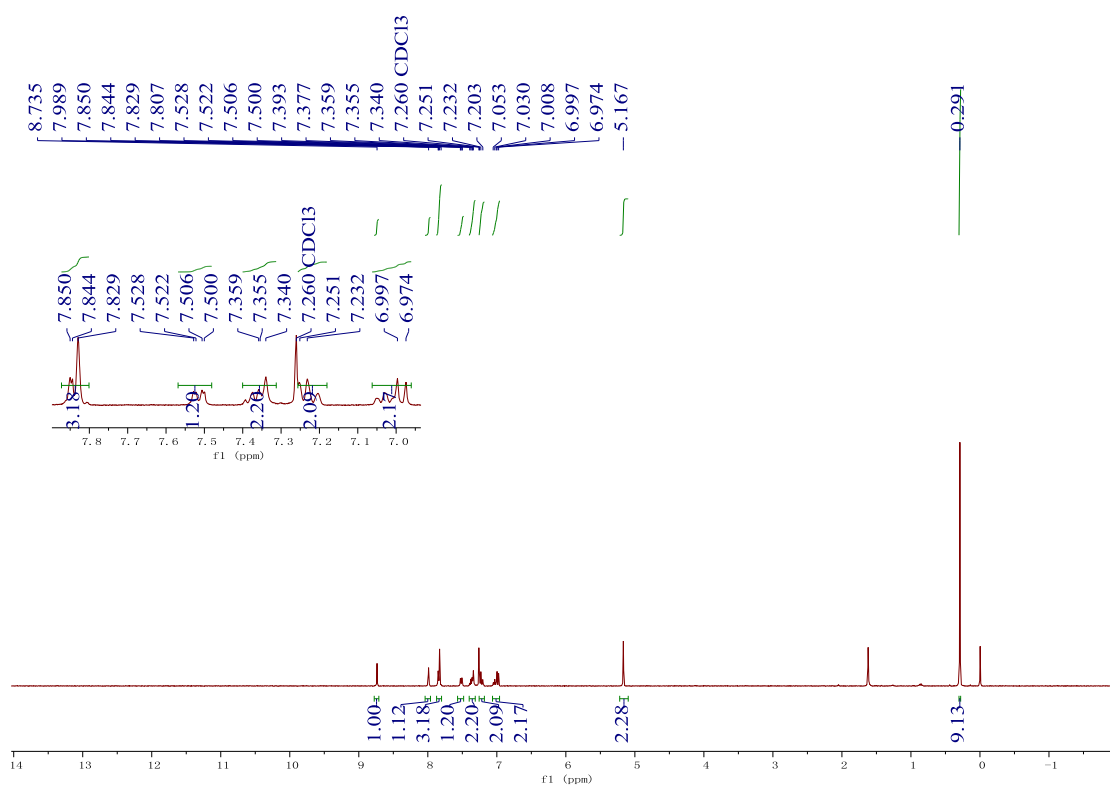

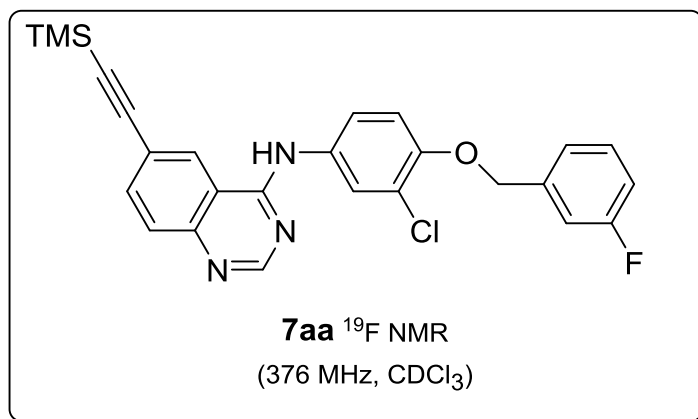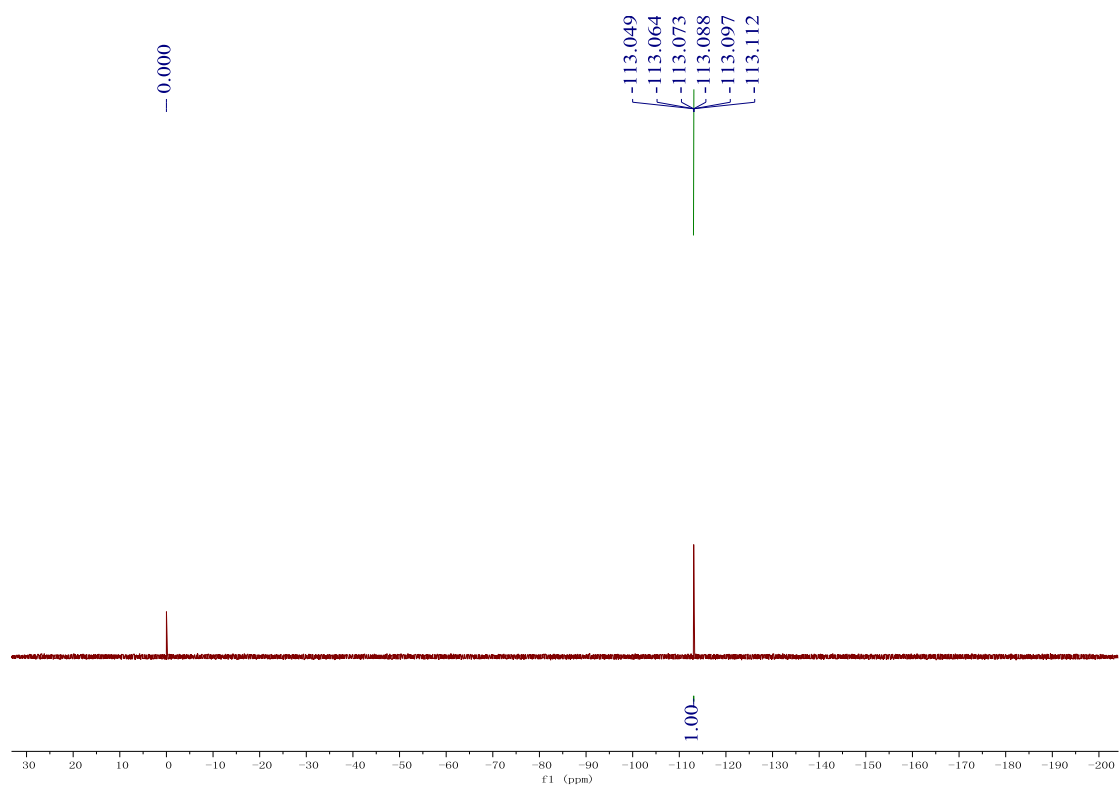

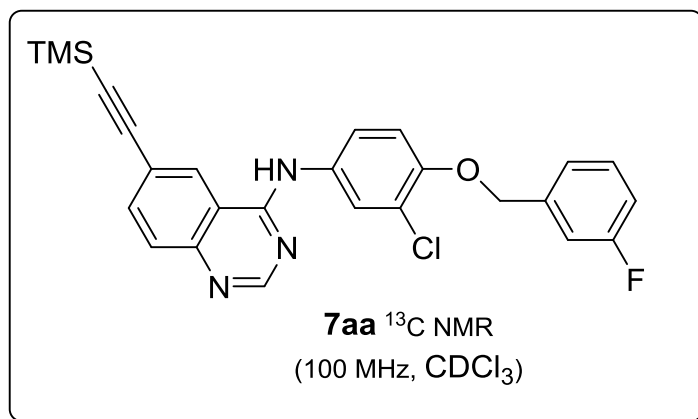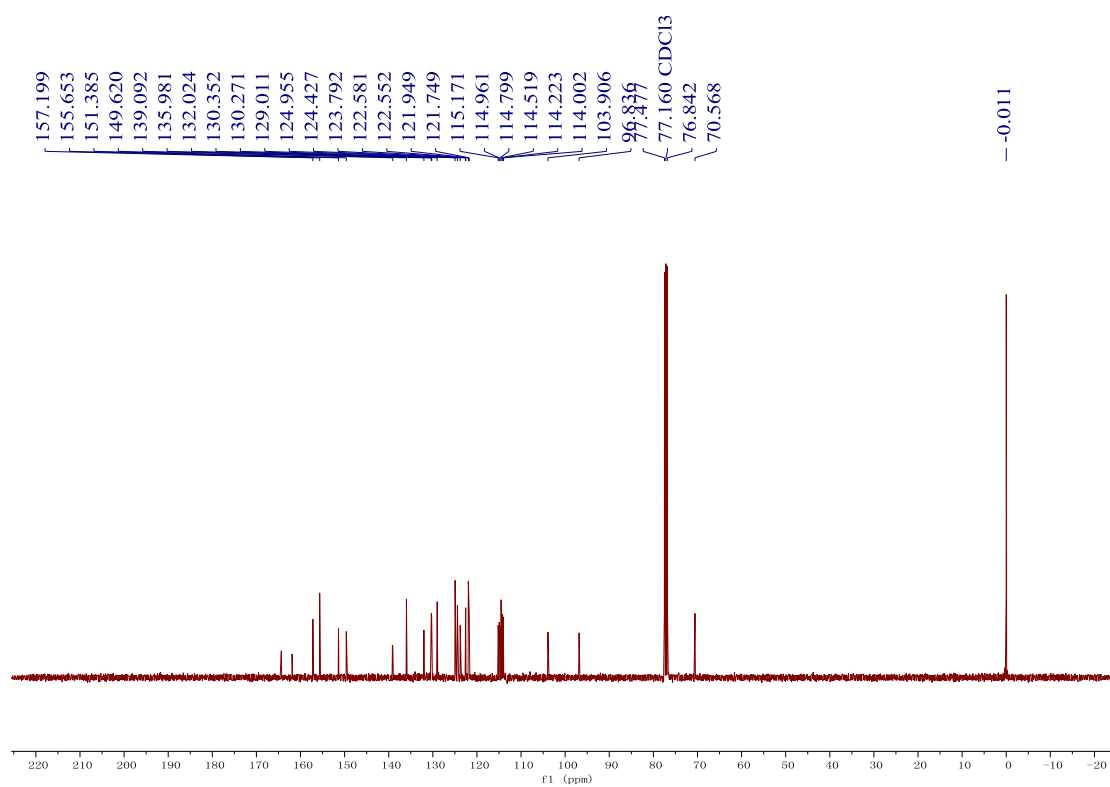

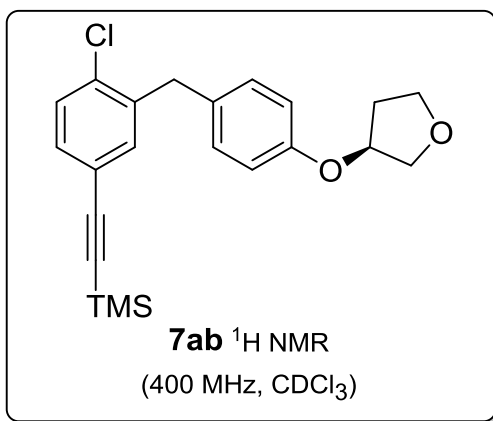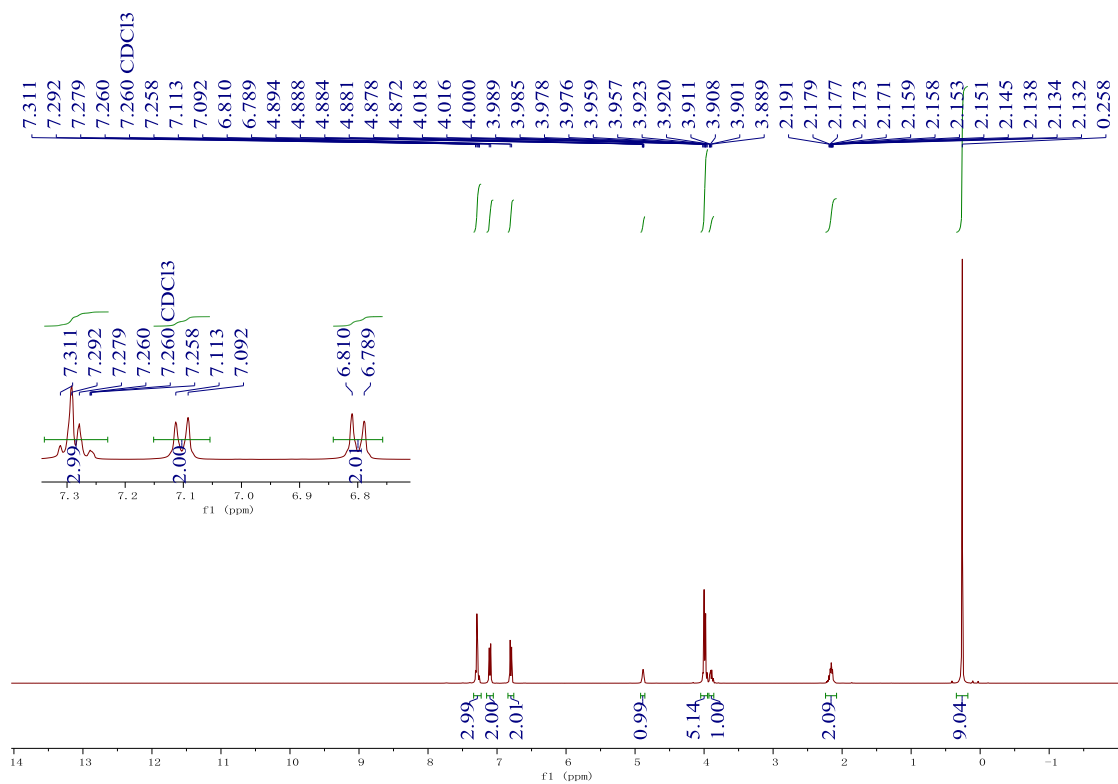



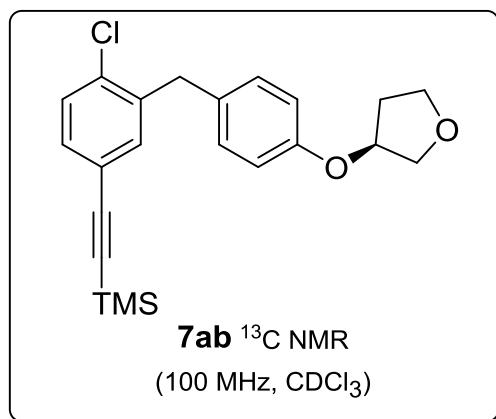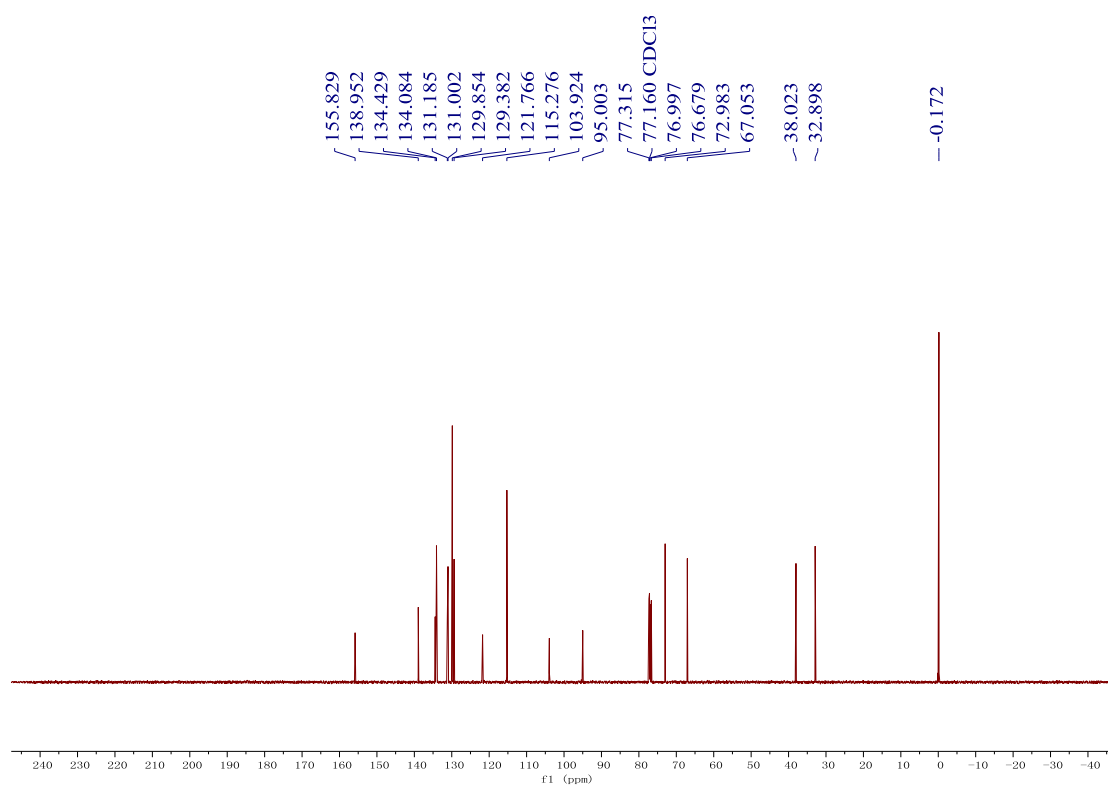

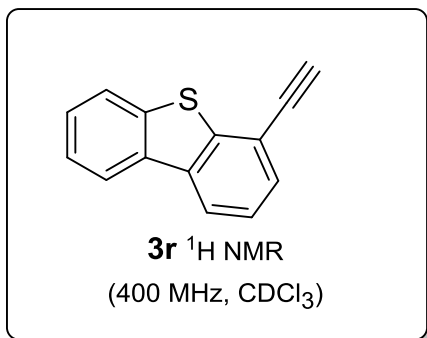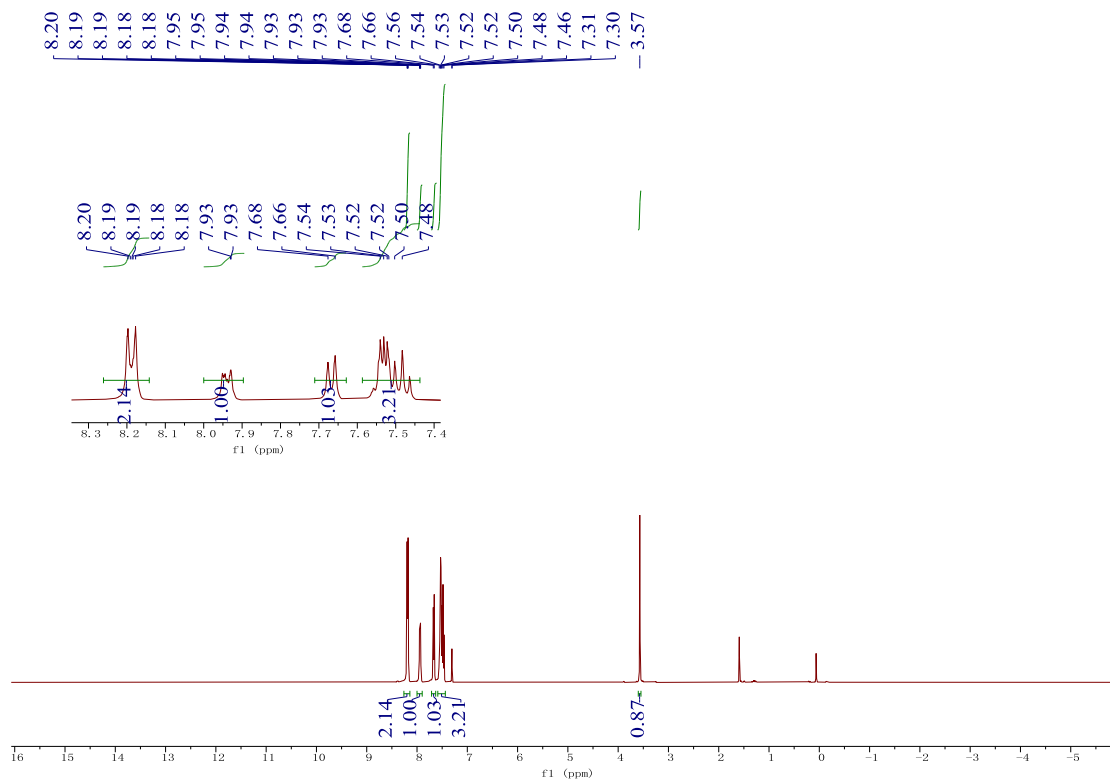

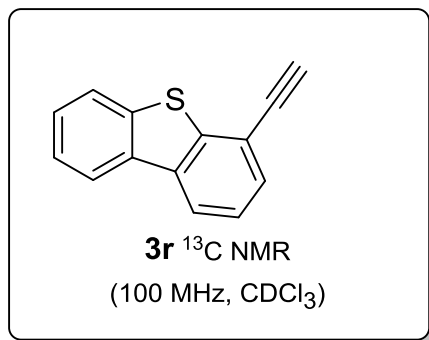

142.994  
139.452  
135.604  
130.387  
127.143  
124.617  
124.431  
122.951  
122.022  
121.880  
116.828  
82.531  
81.348  
77.160  $\text{CDCl}_3$

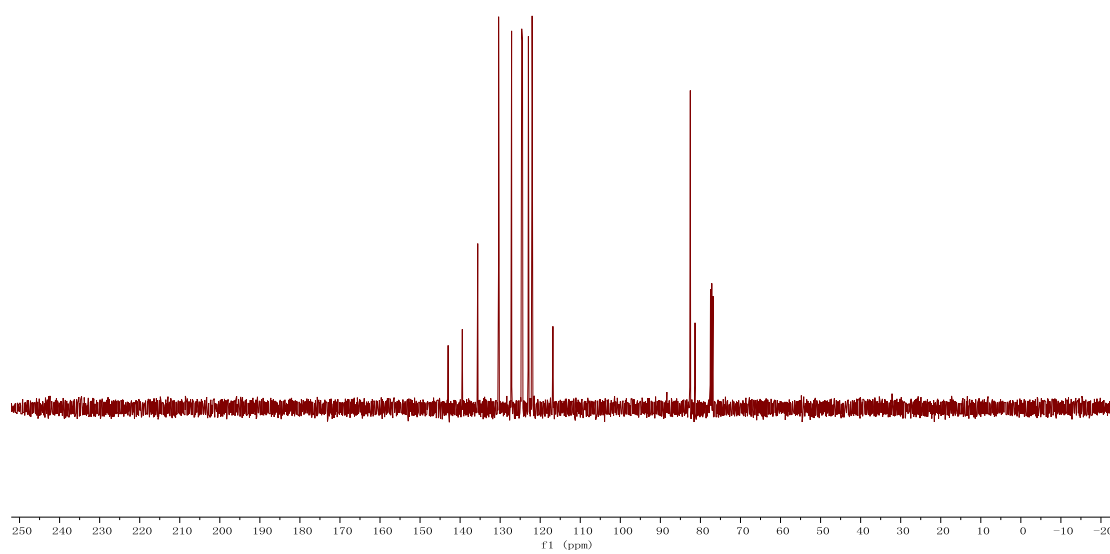

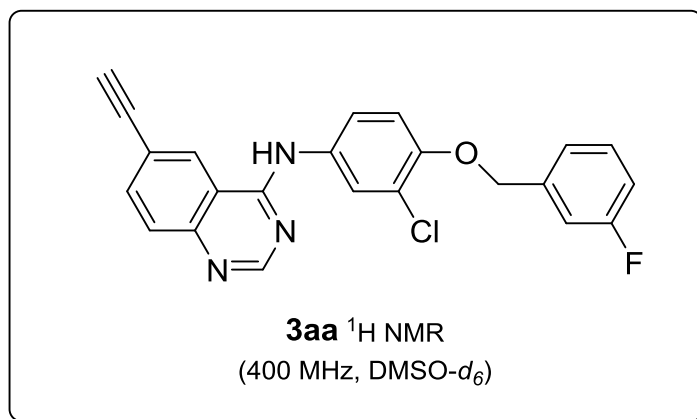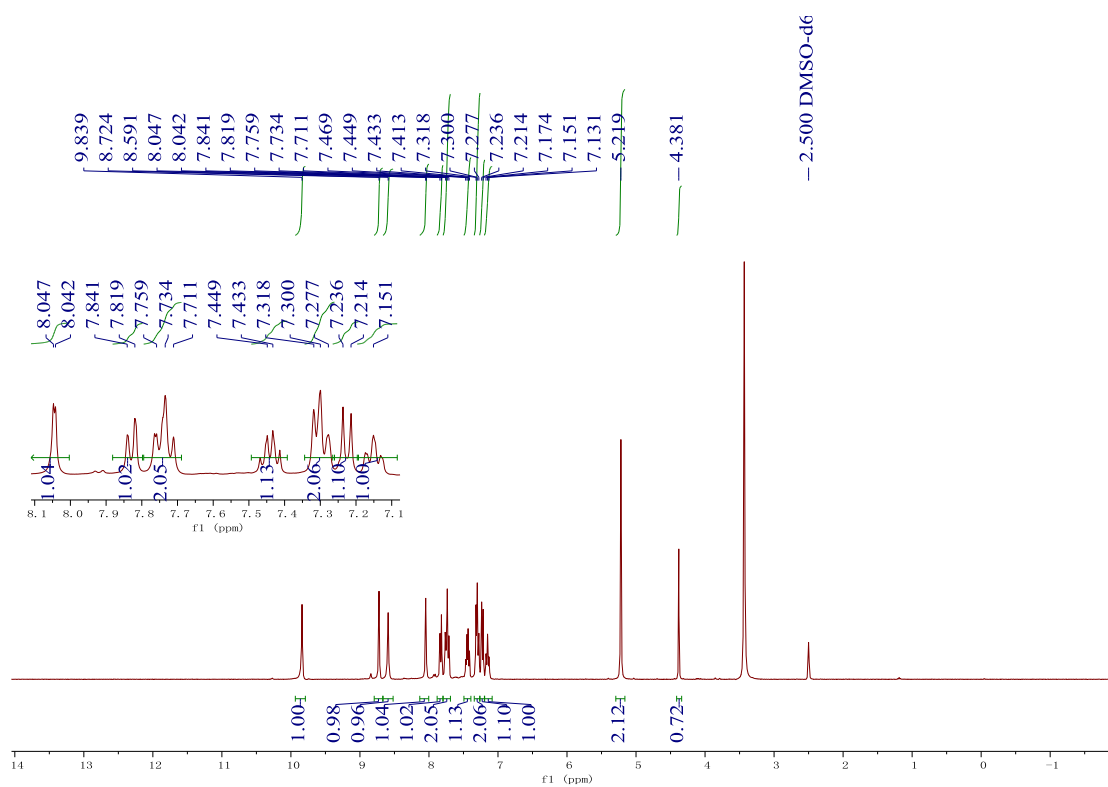

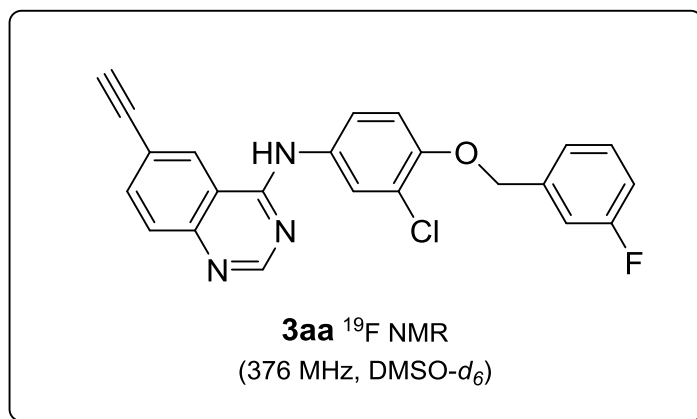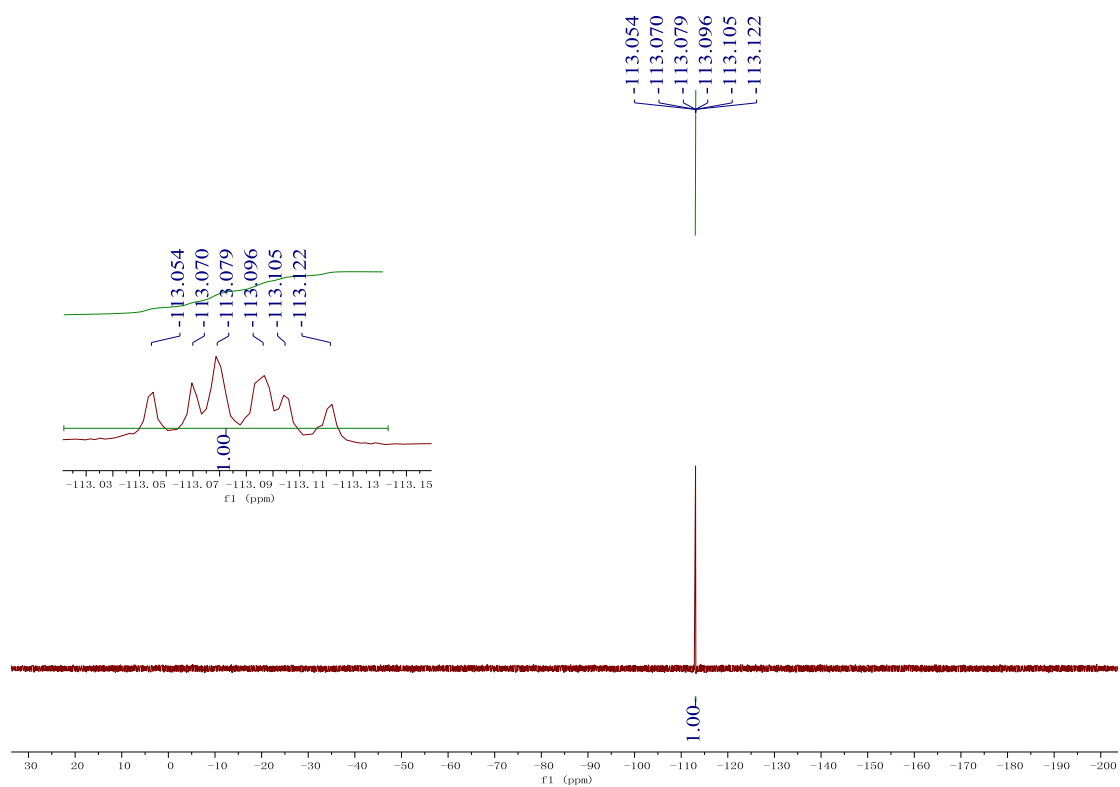

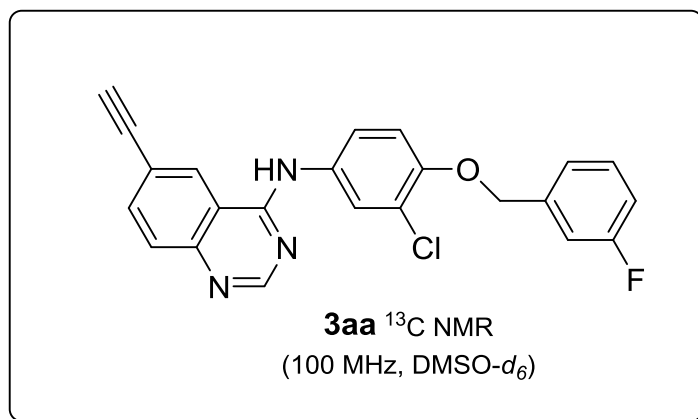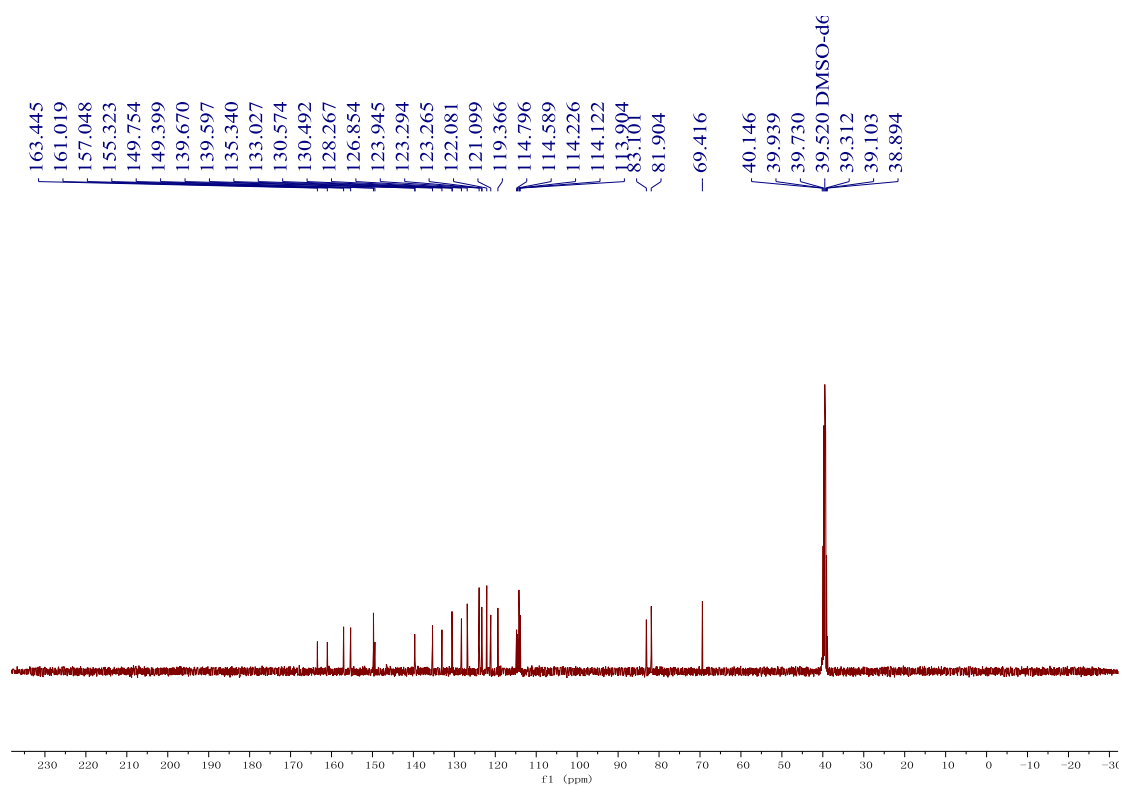

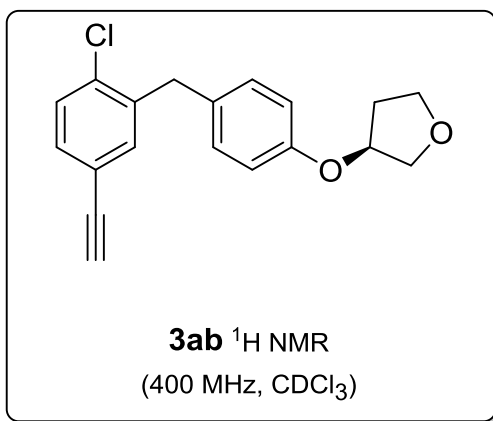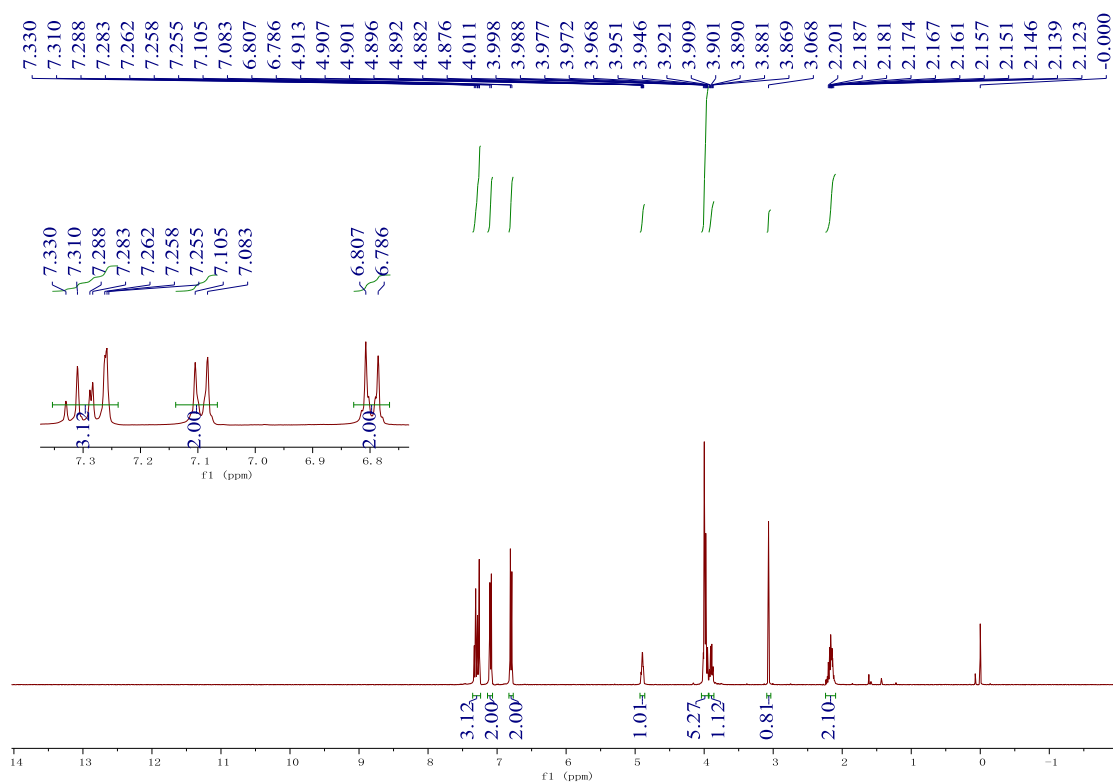

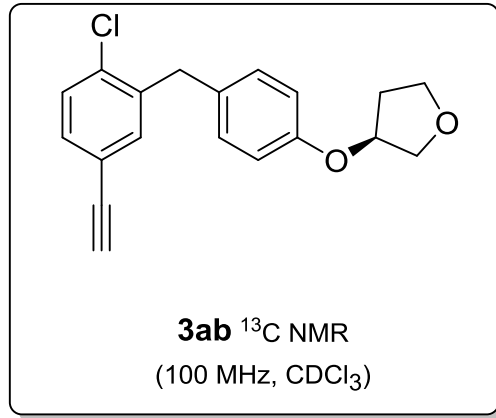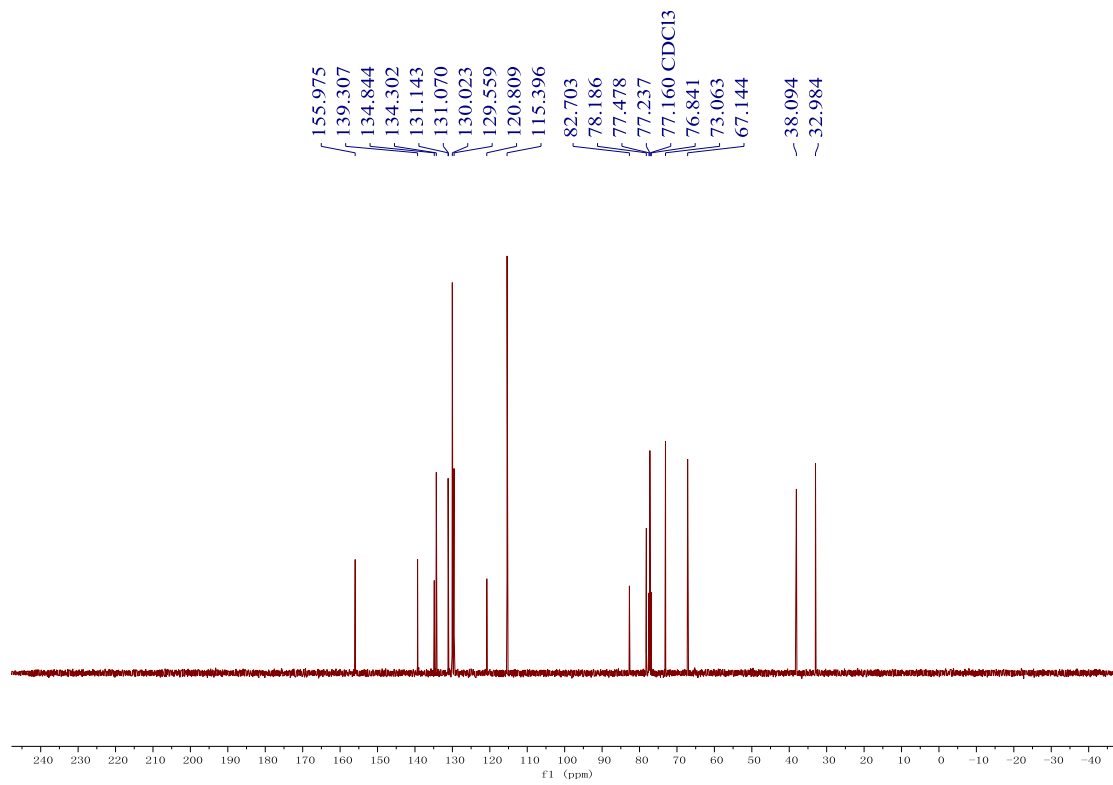



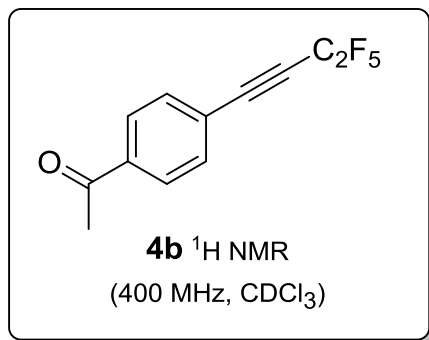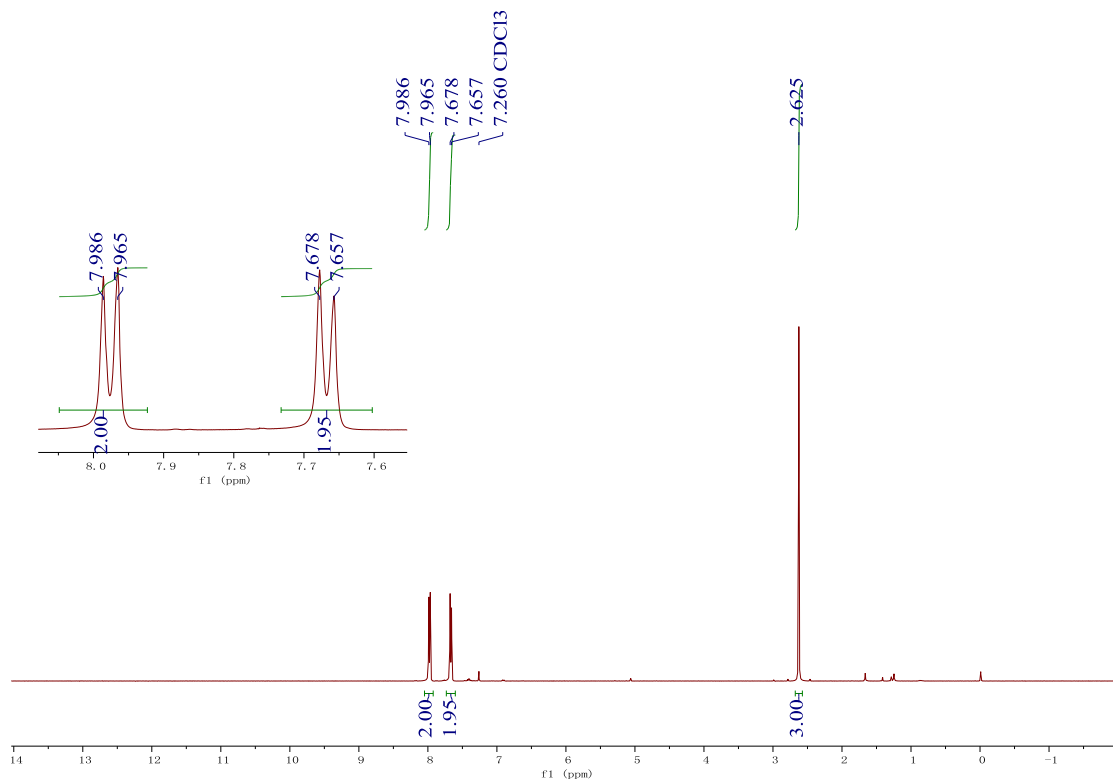

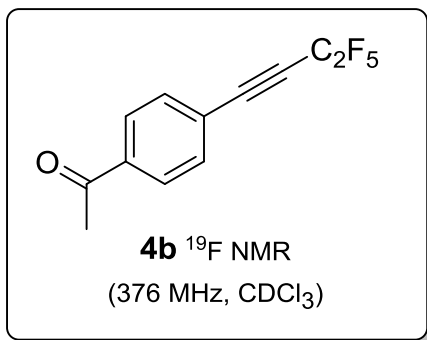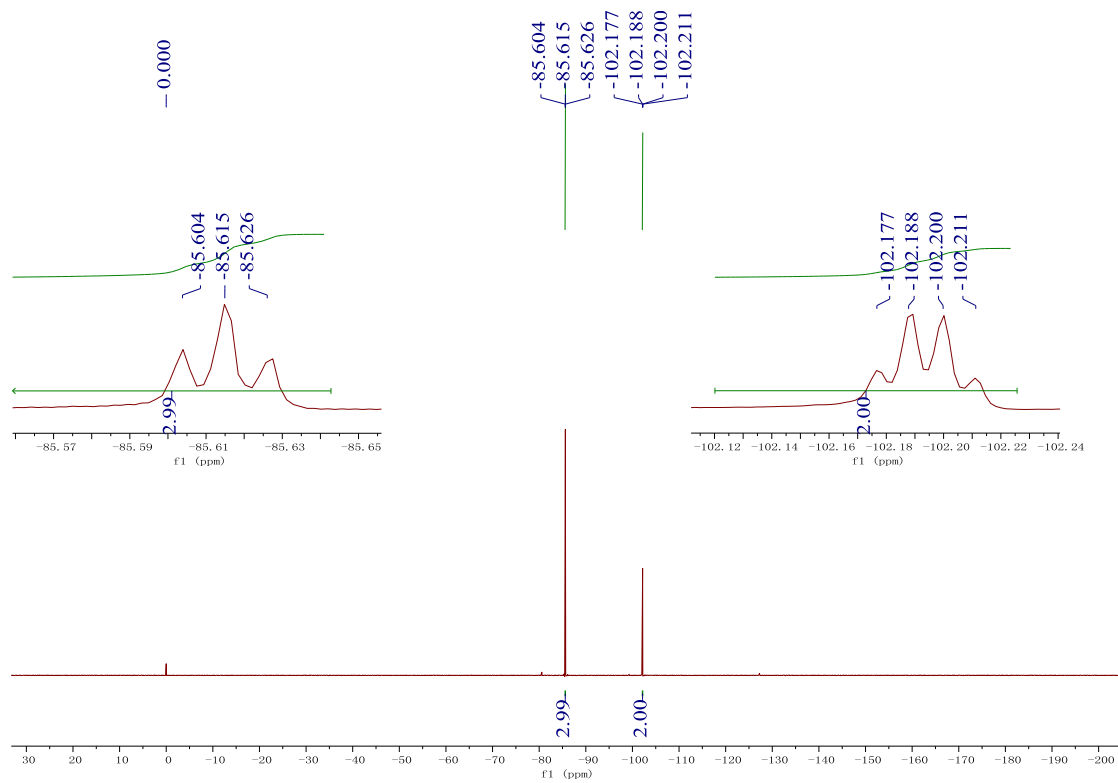

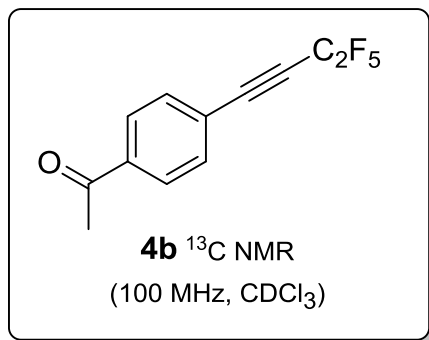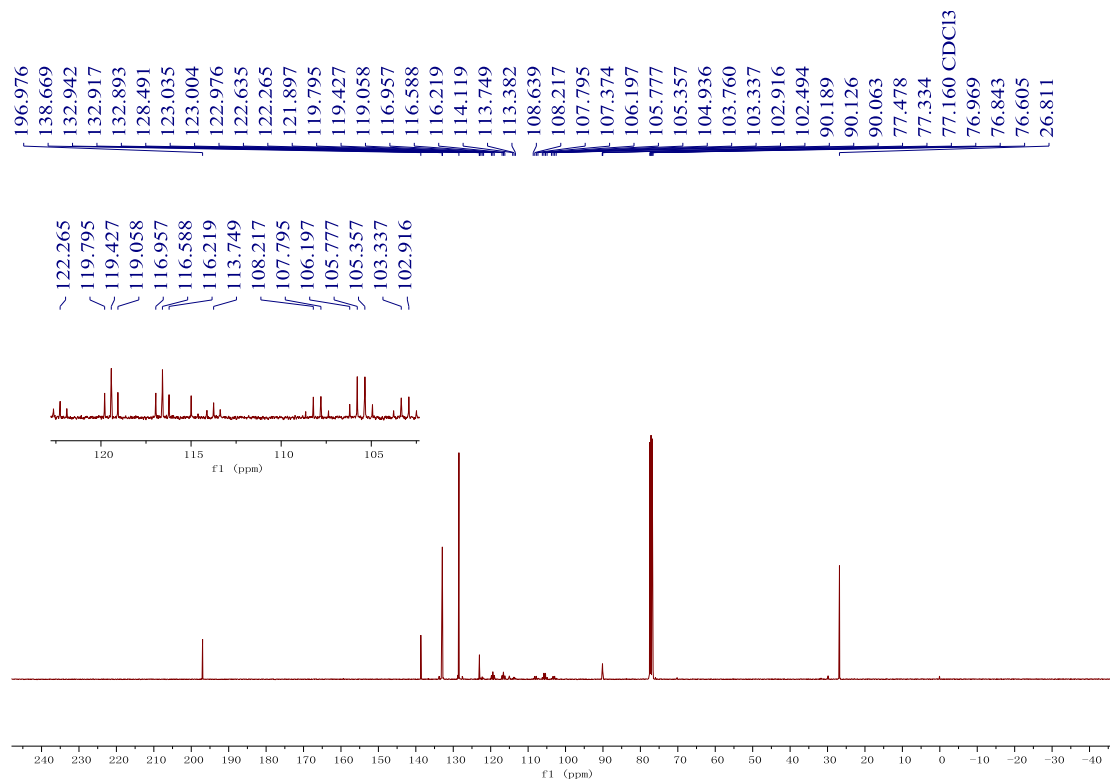

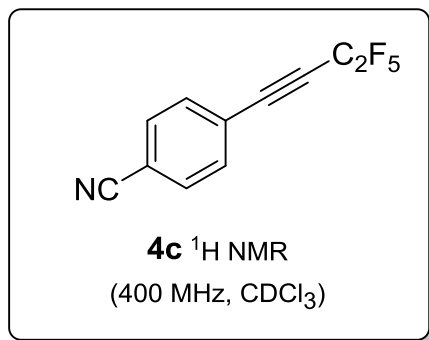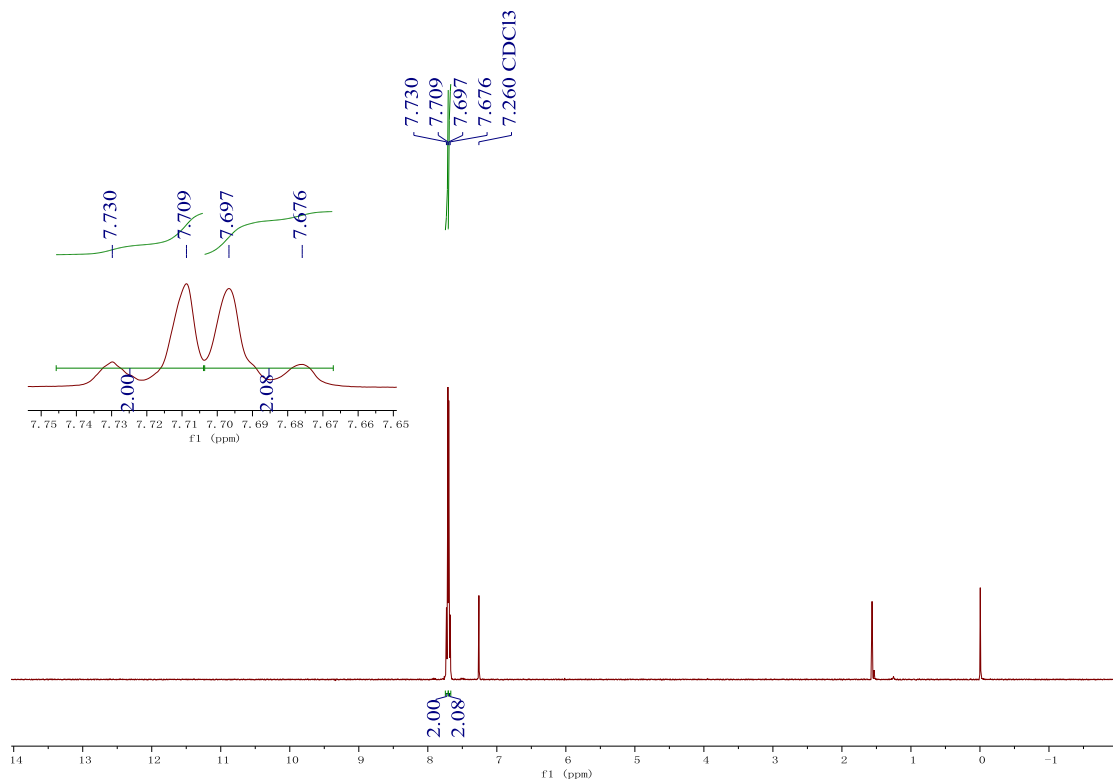

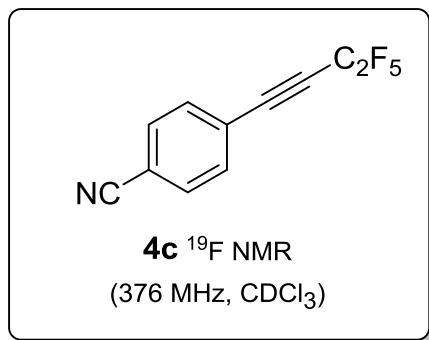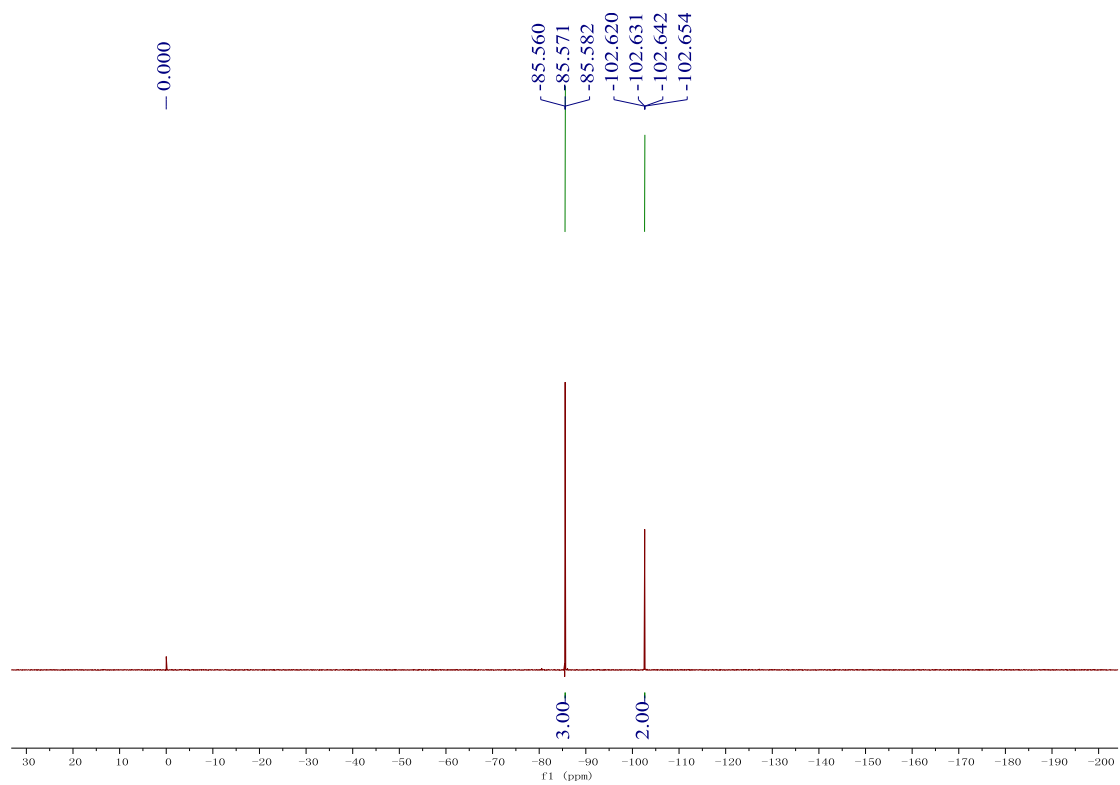

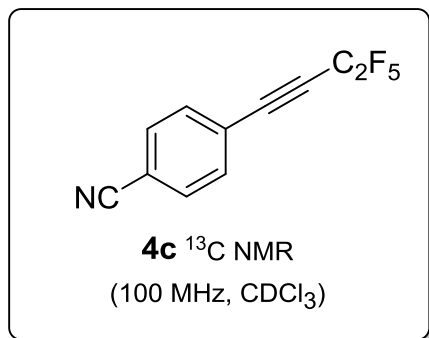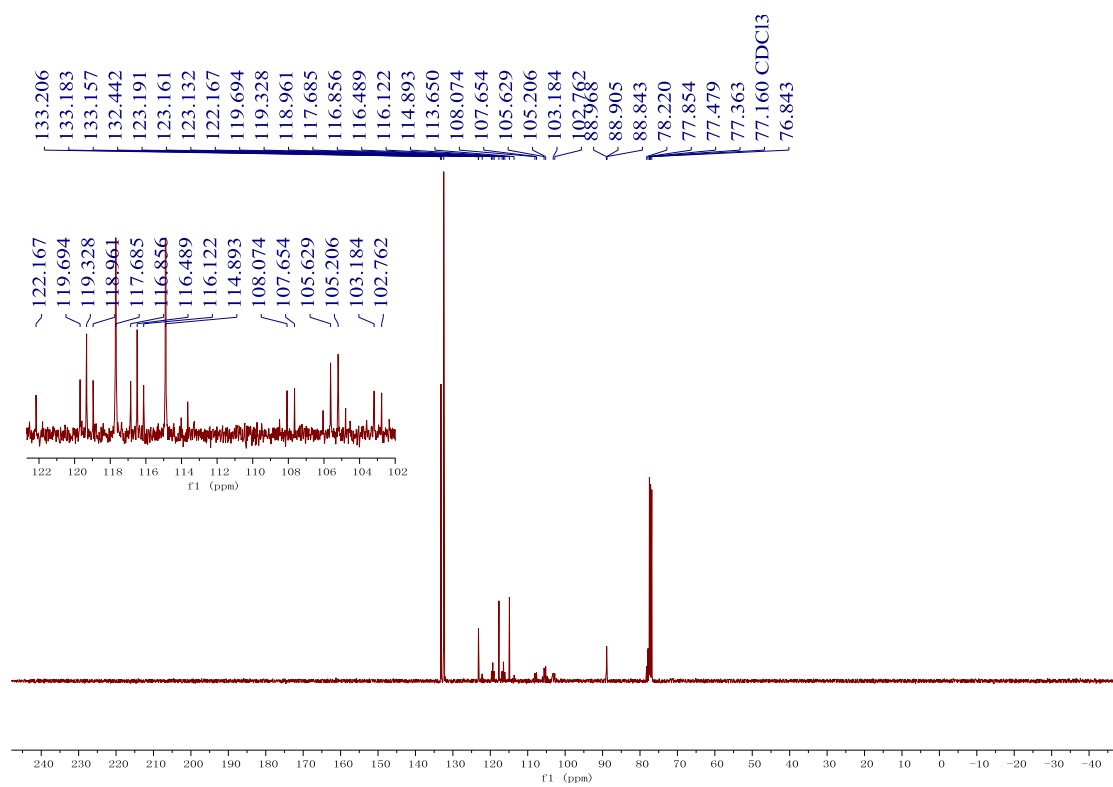

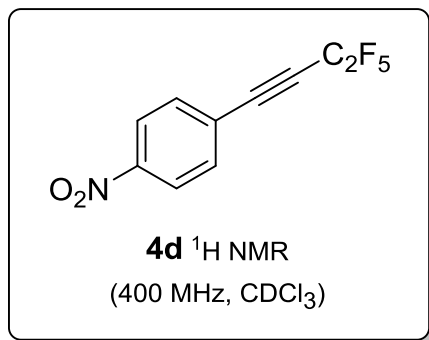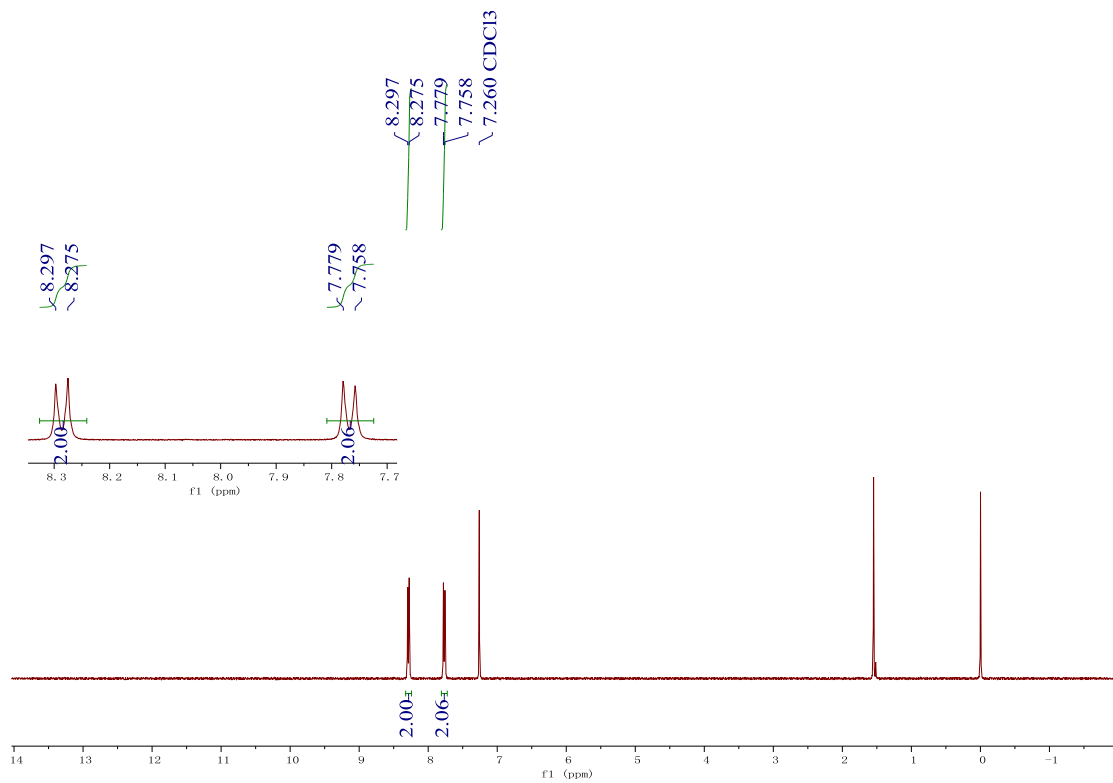

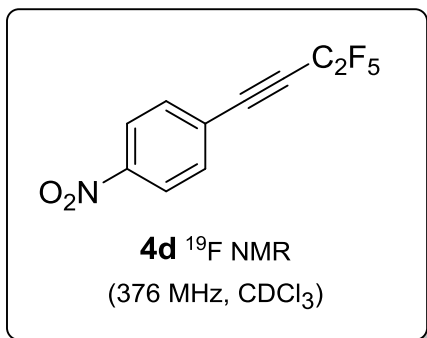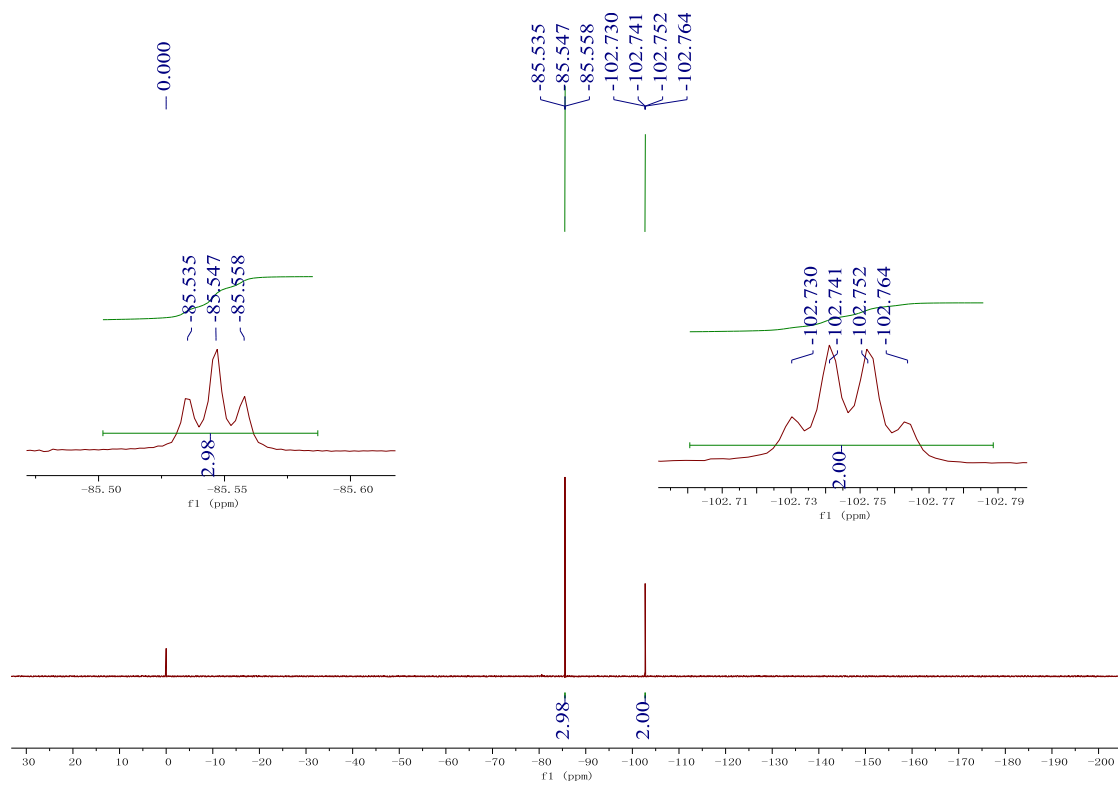



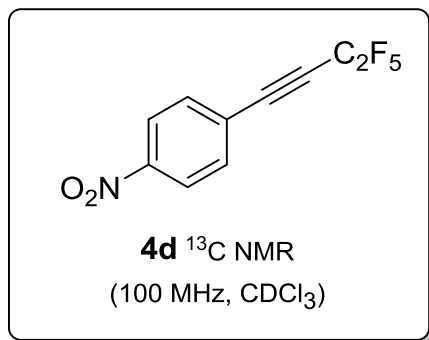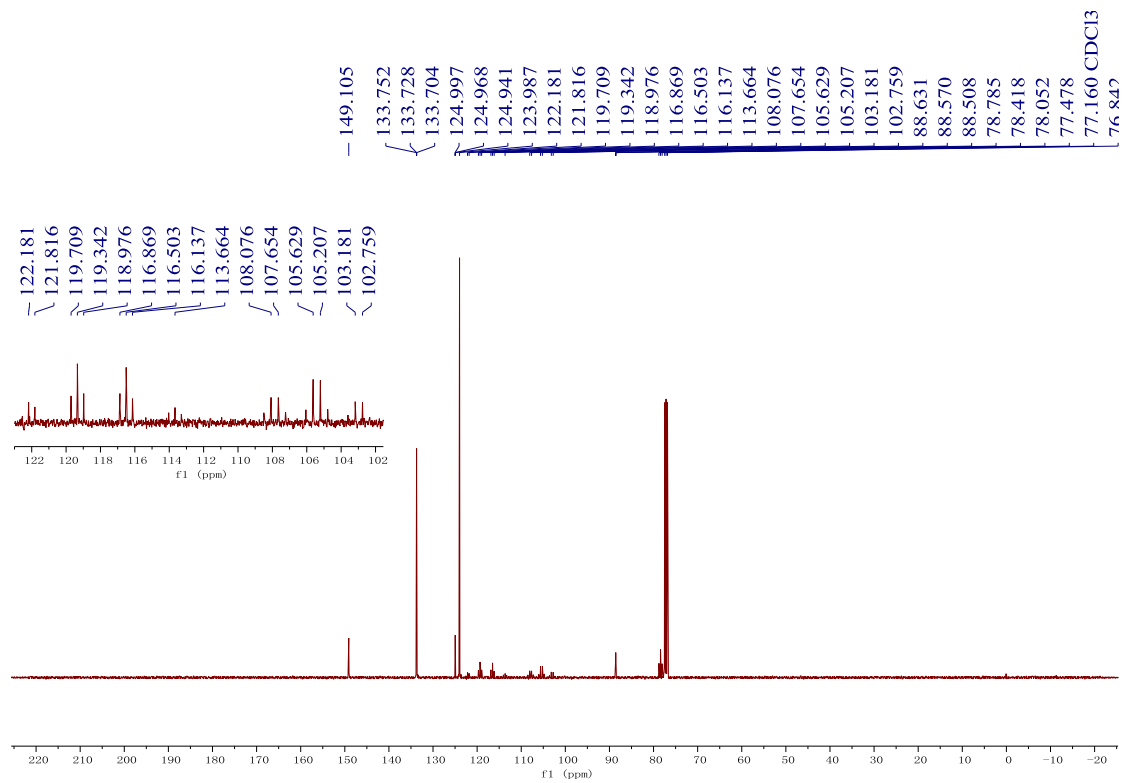

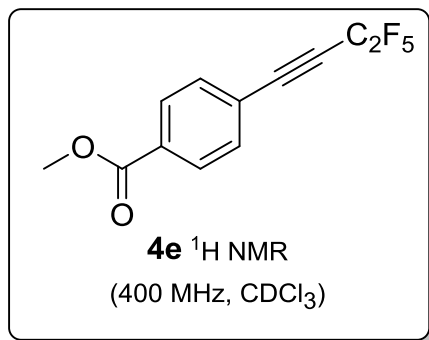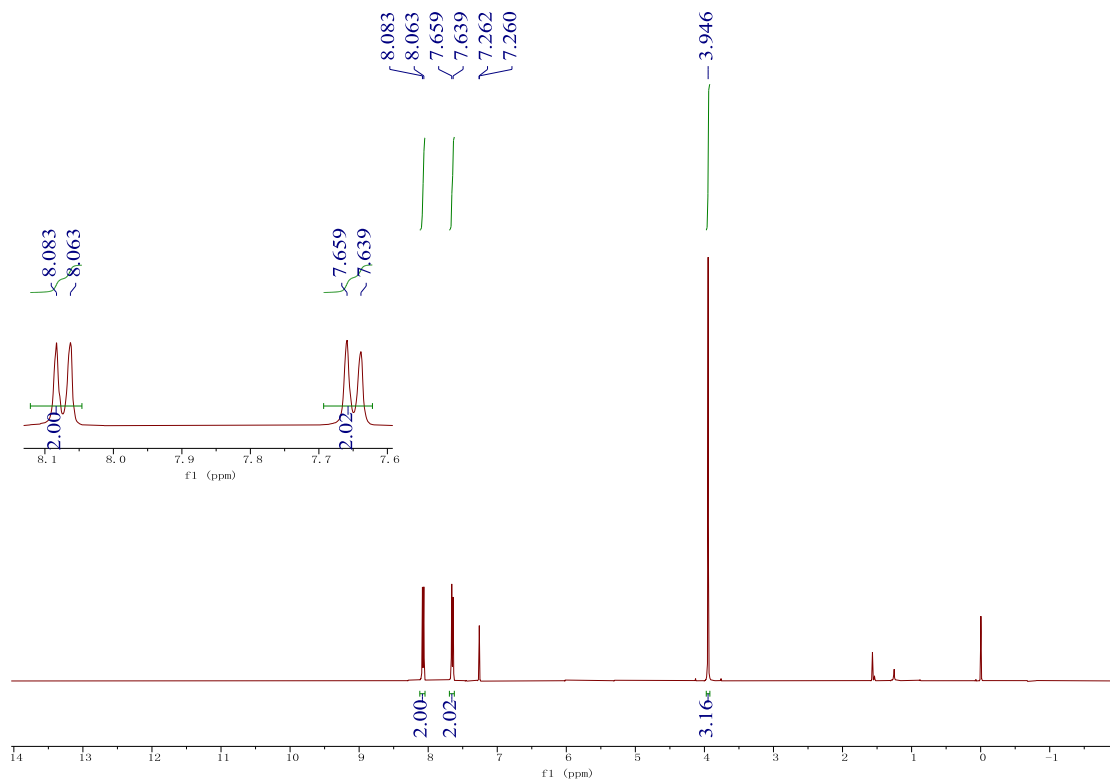

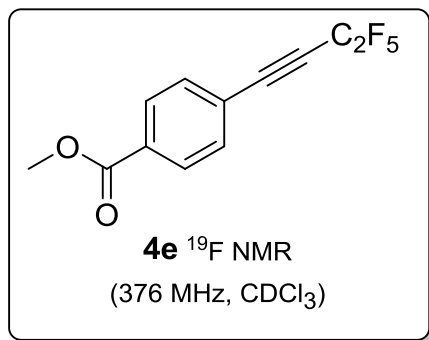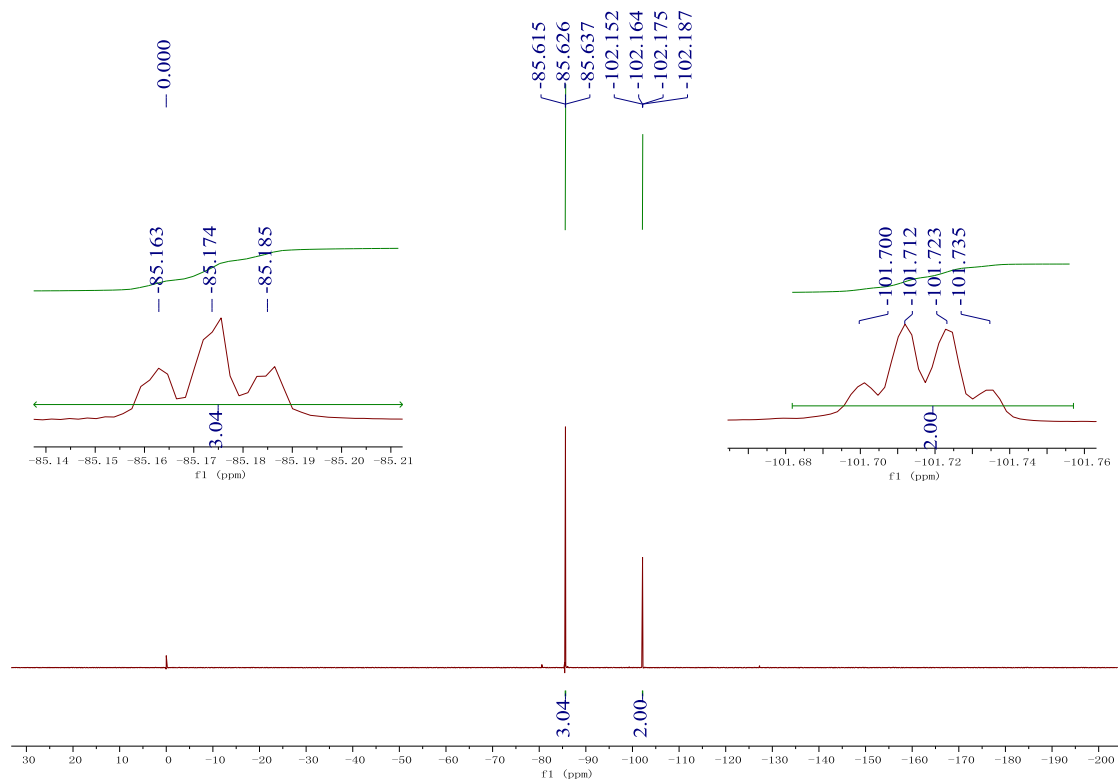

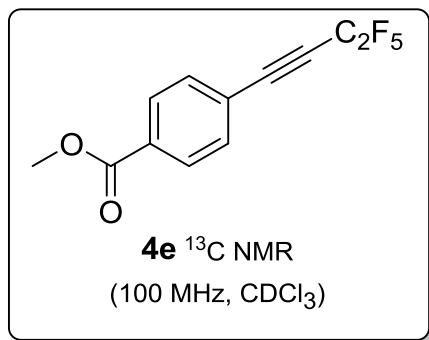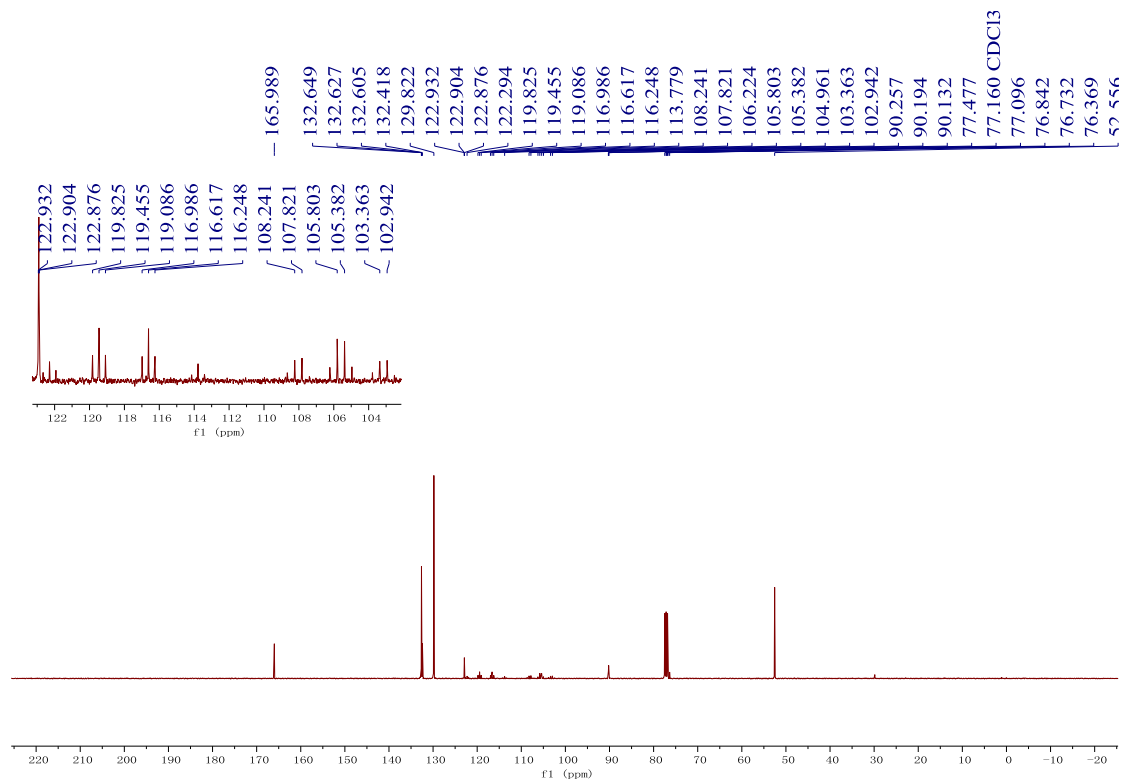

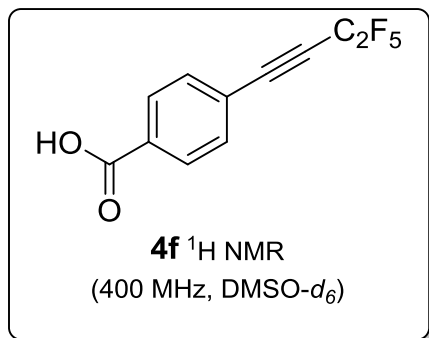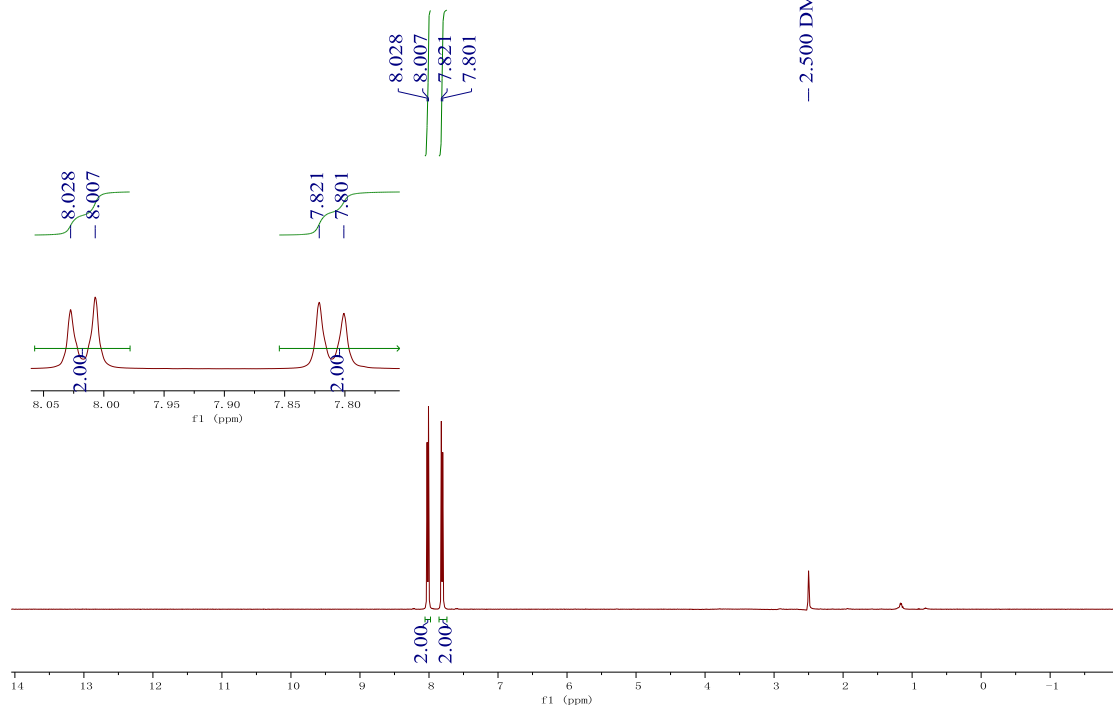

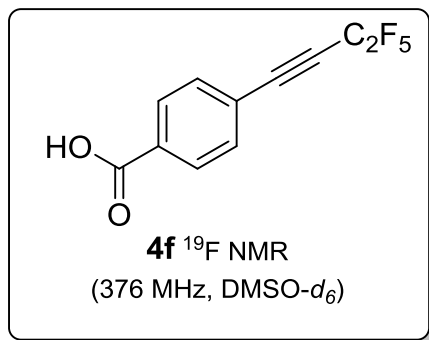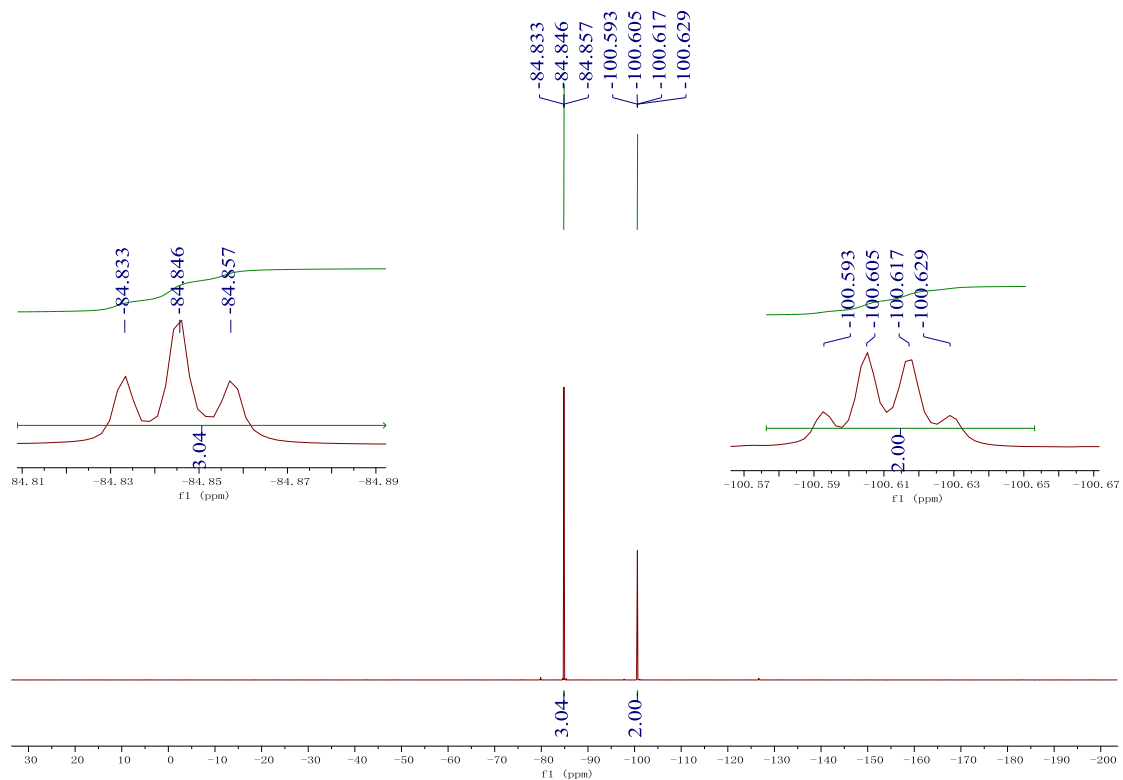

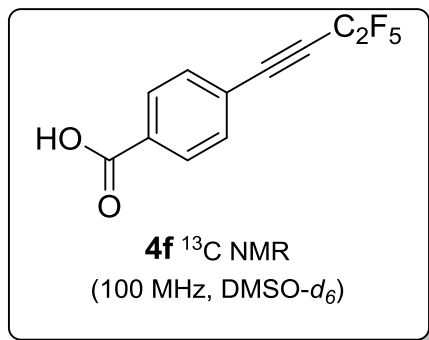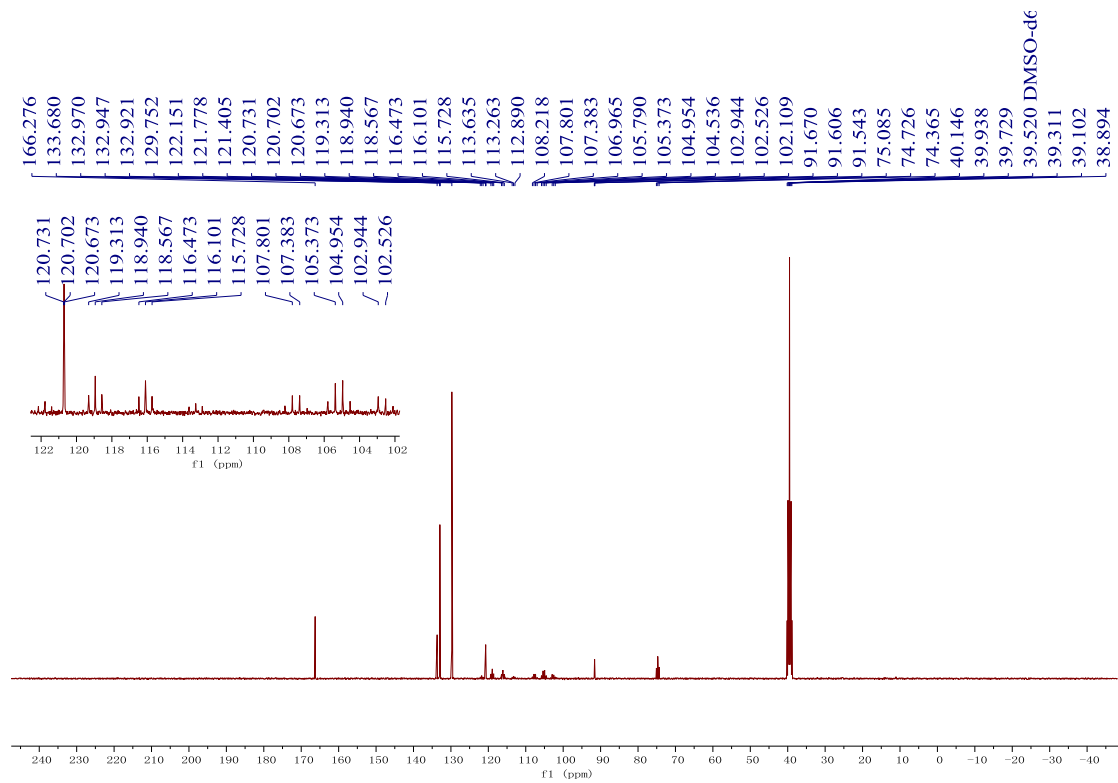

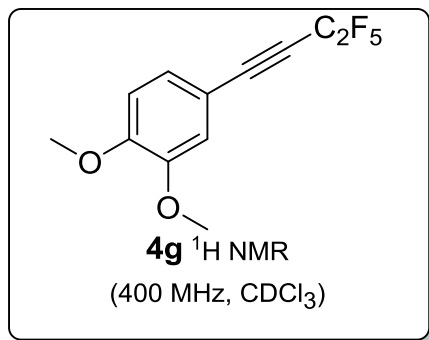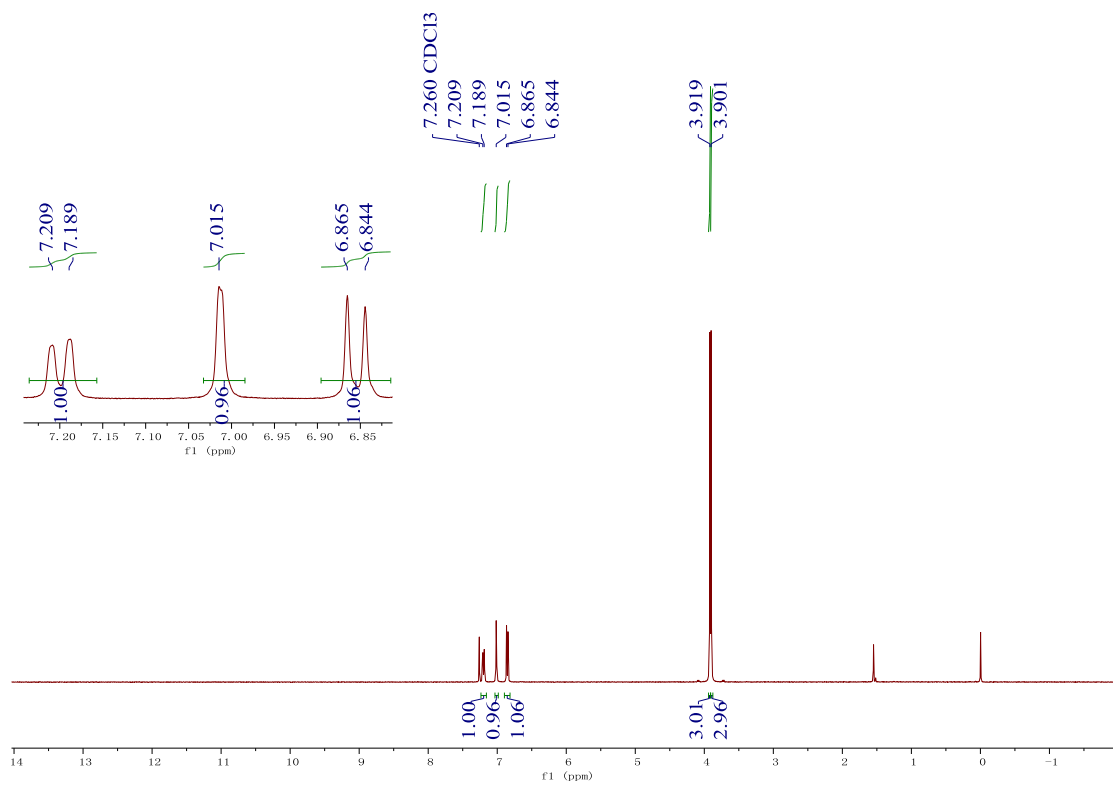



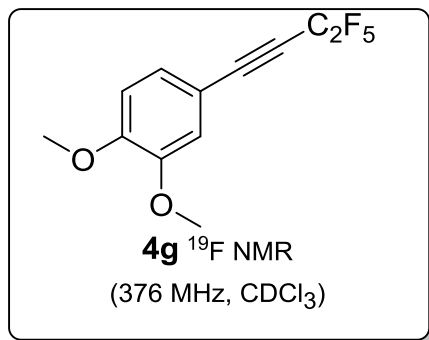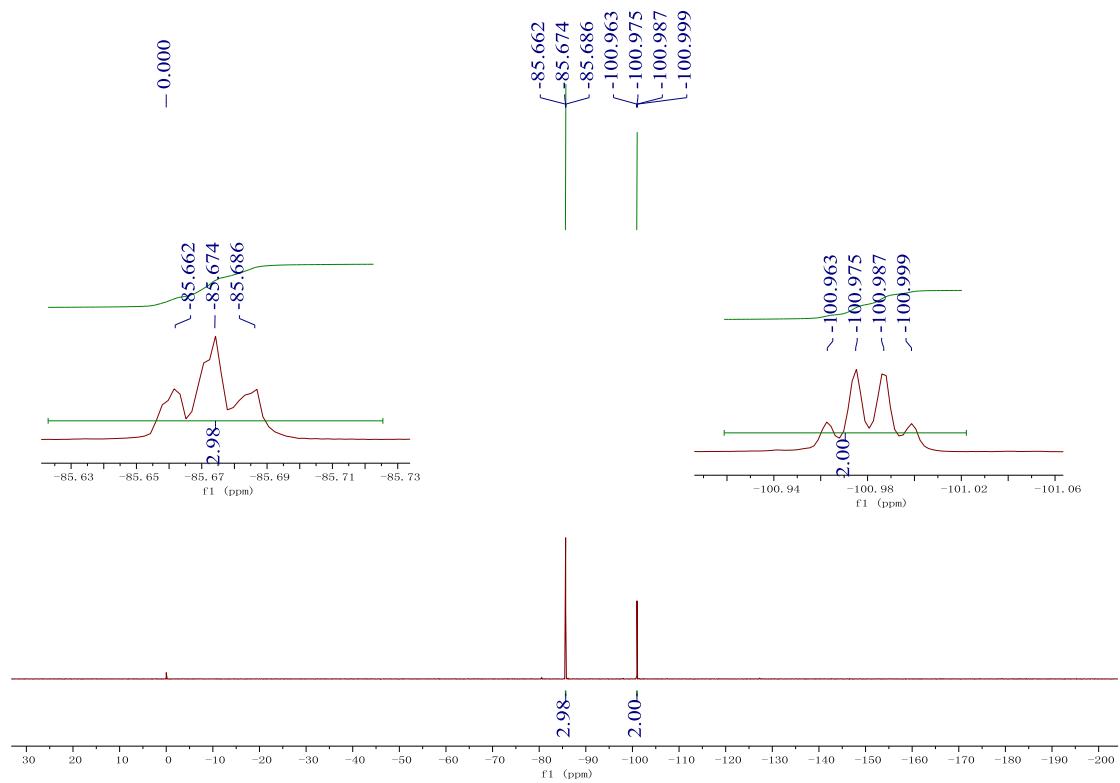

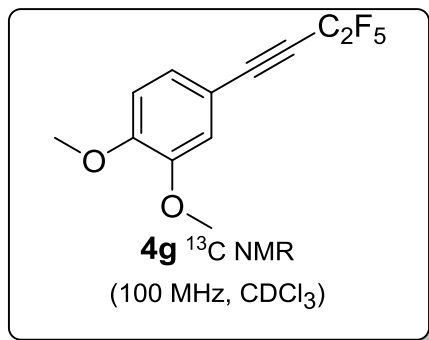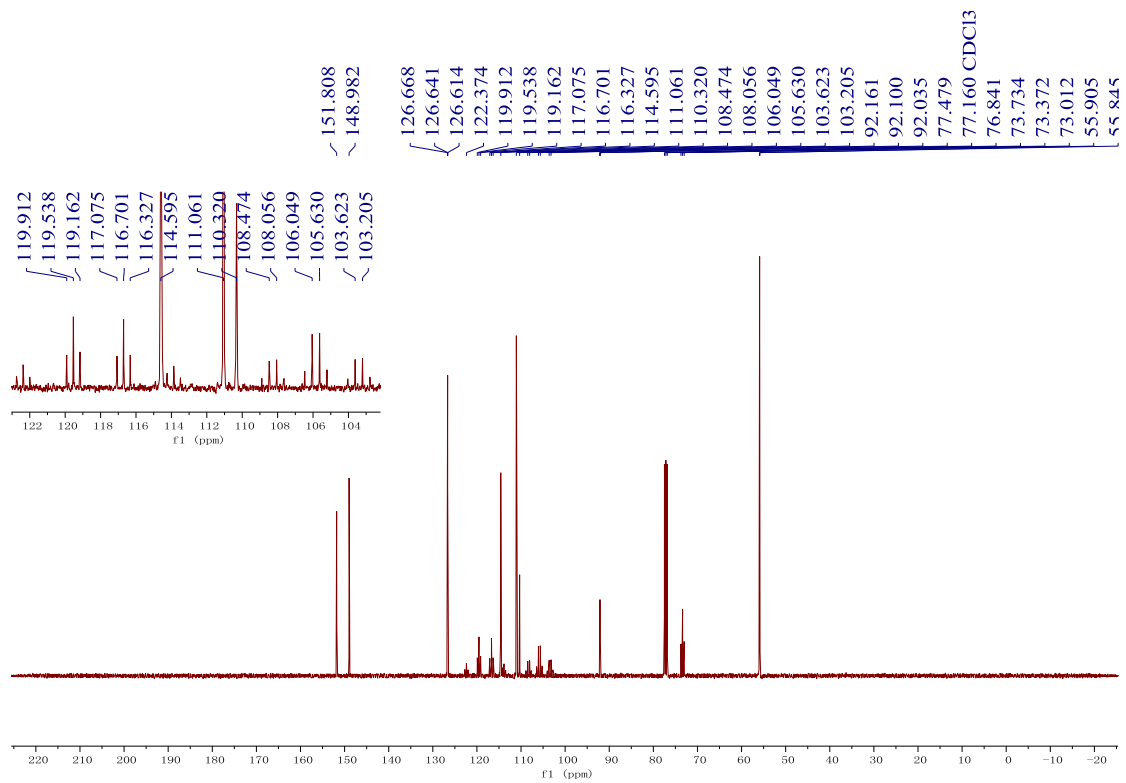

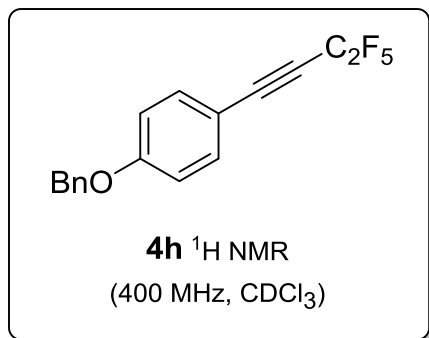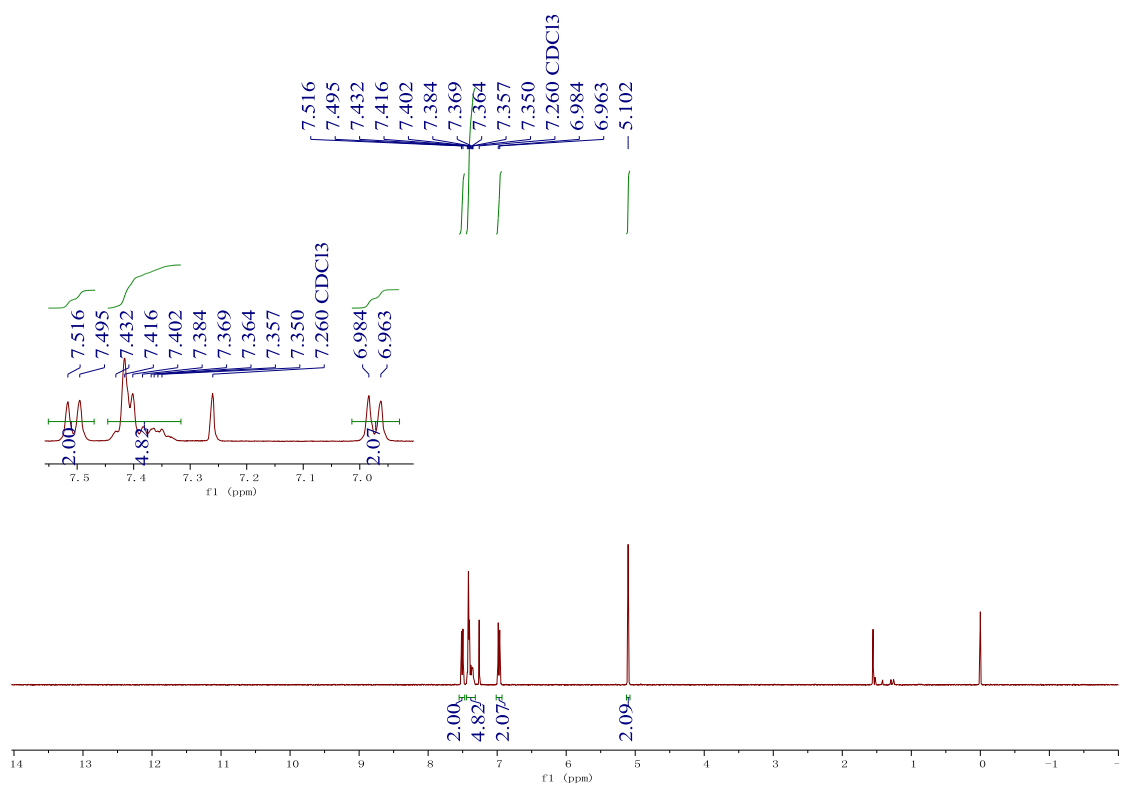

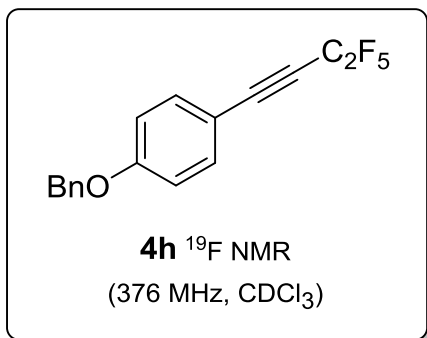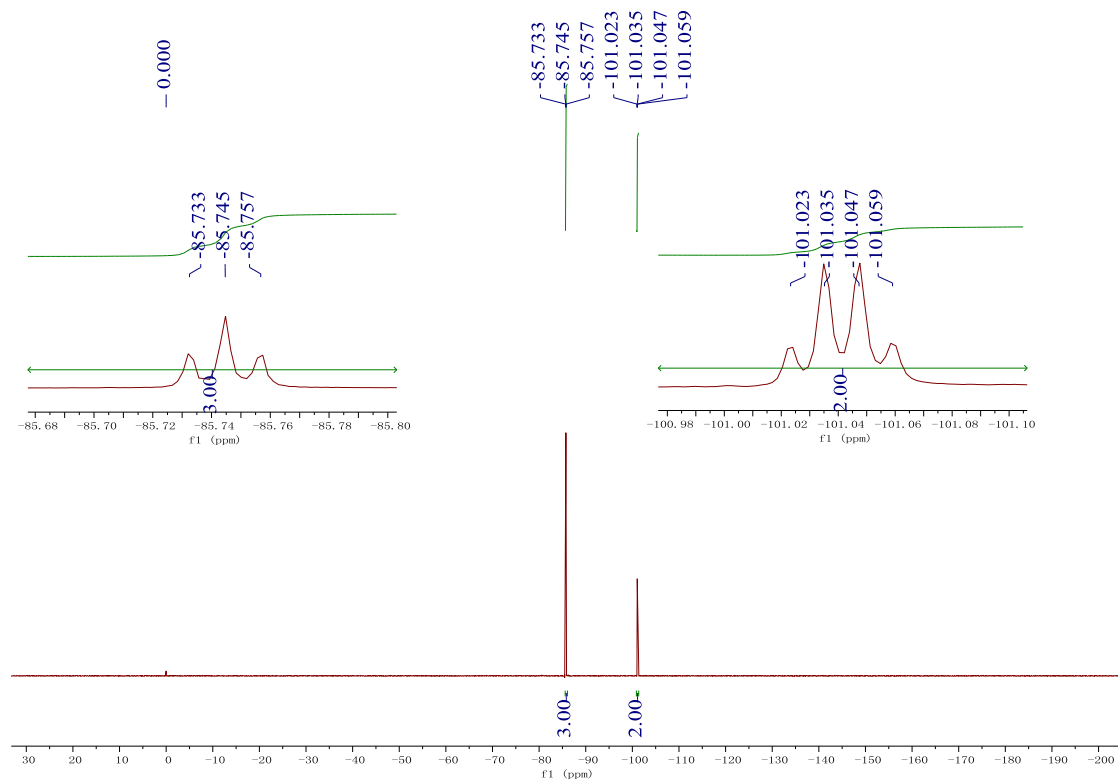

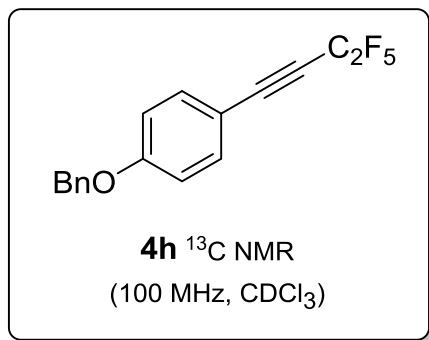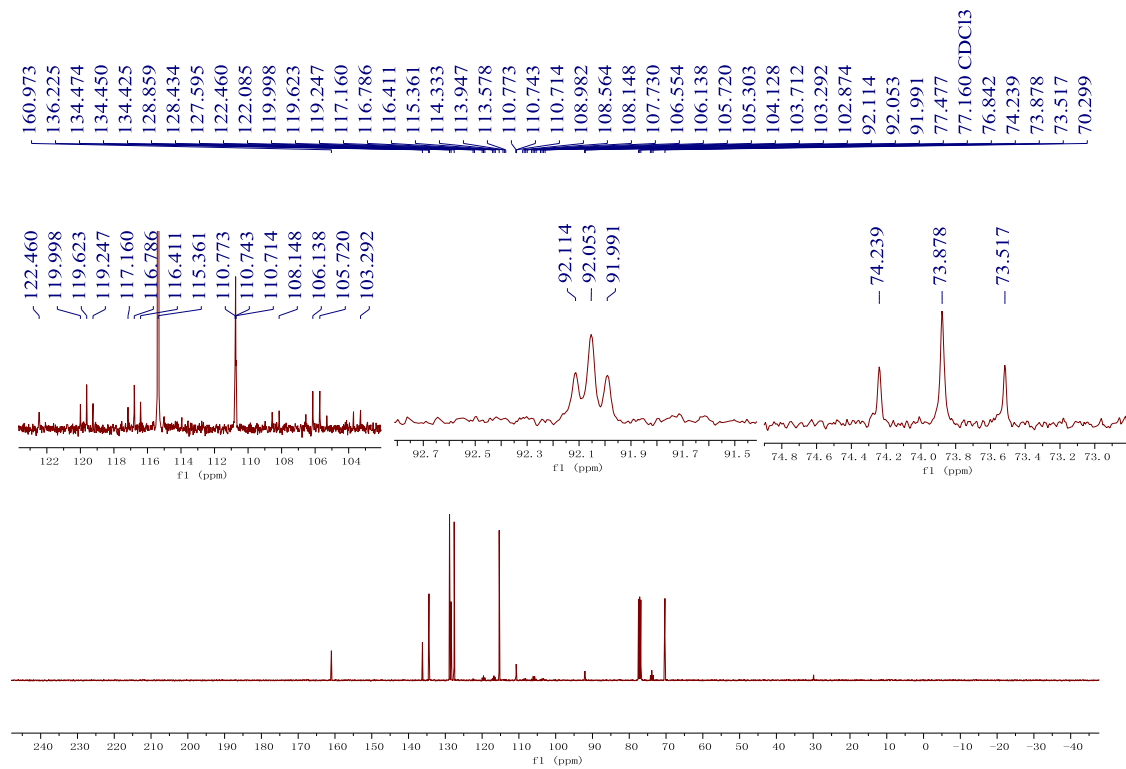

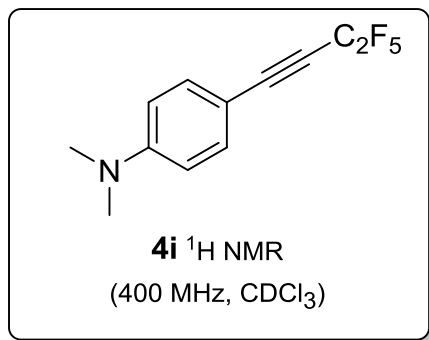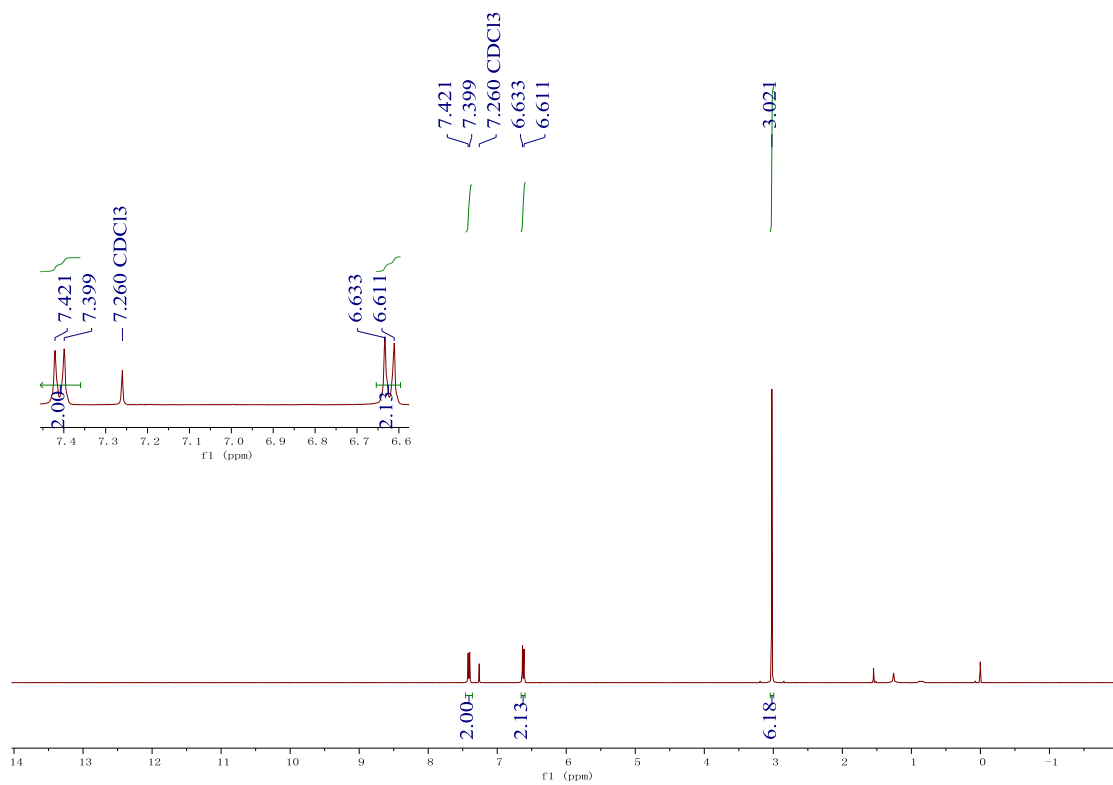

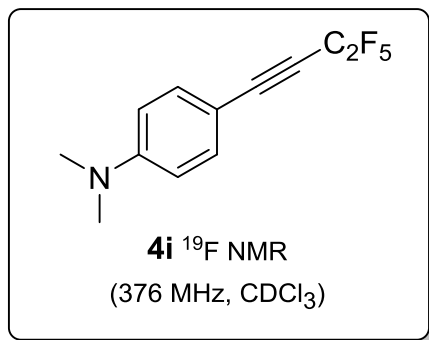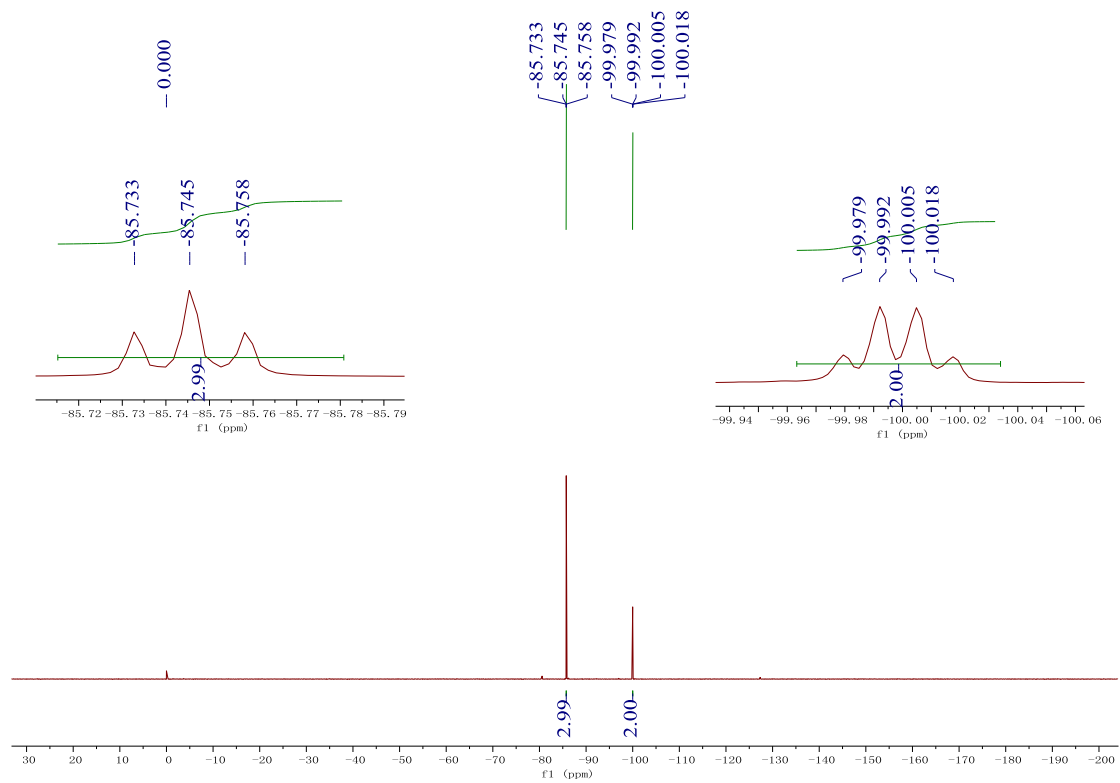

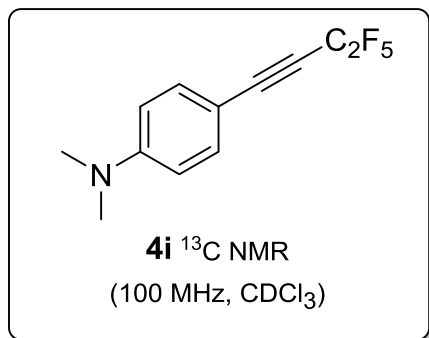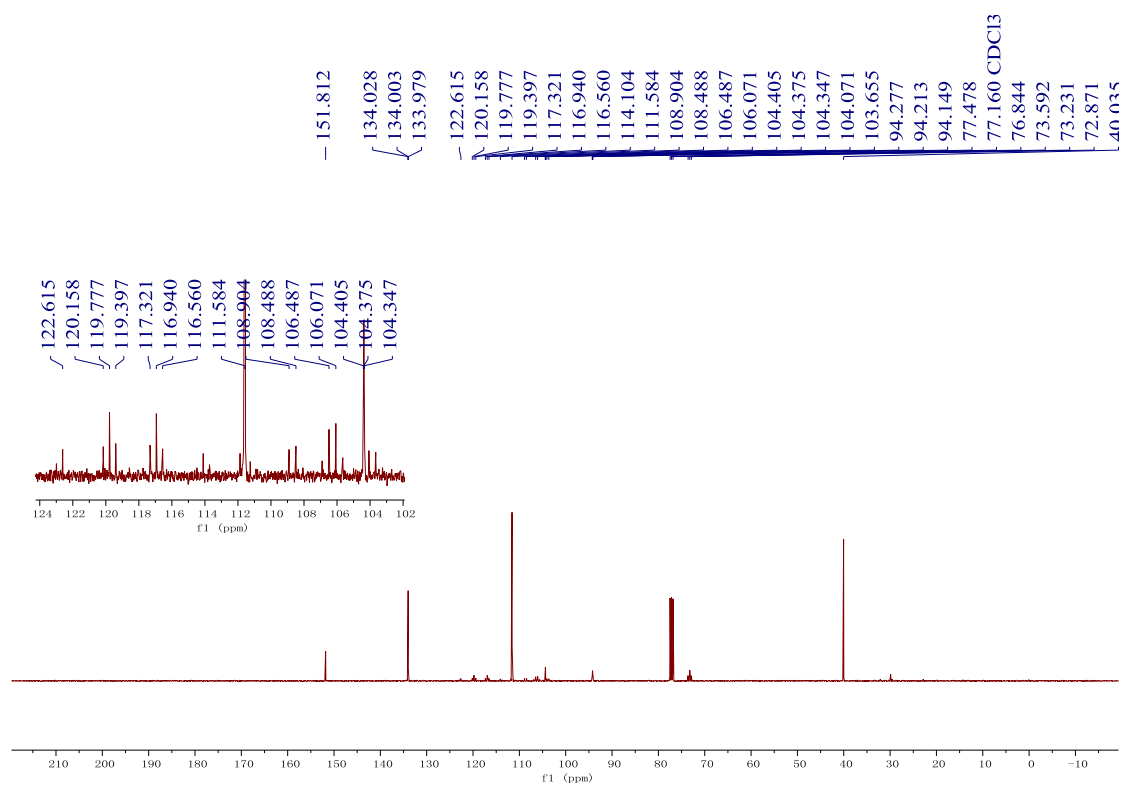



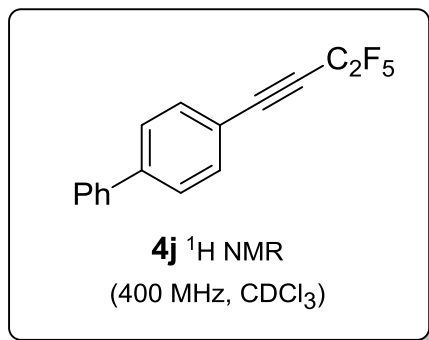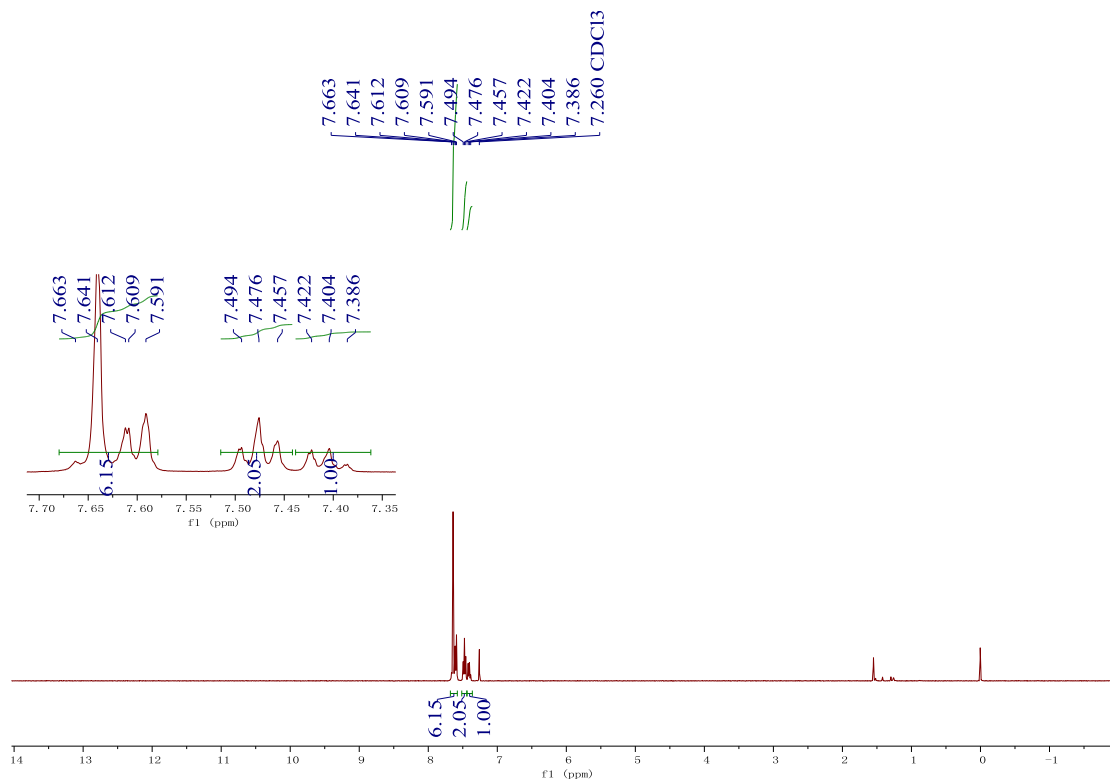

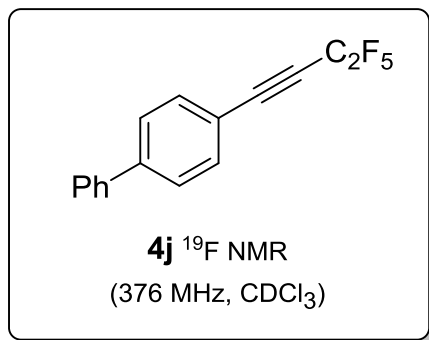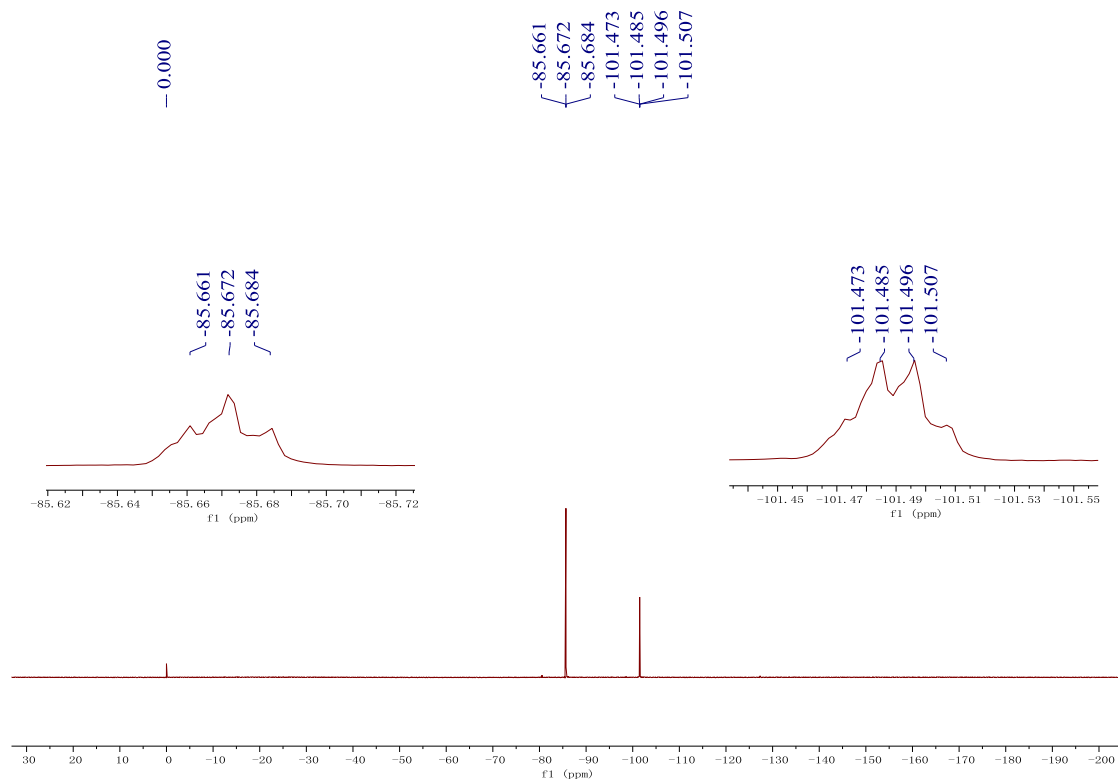

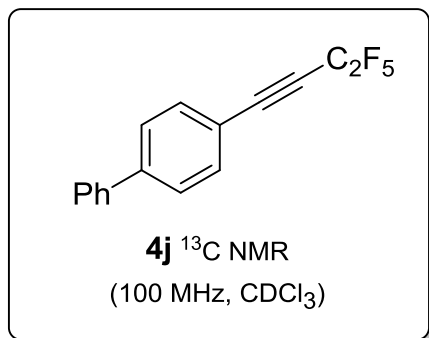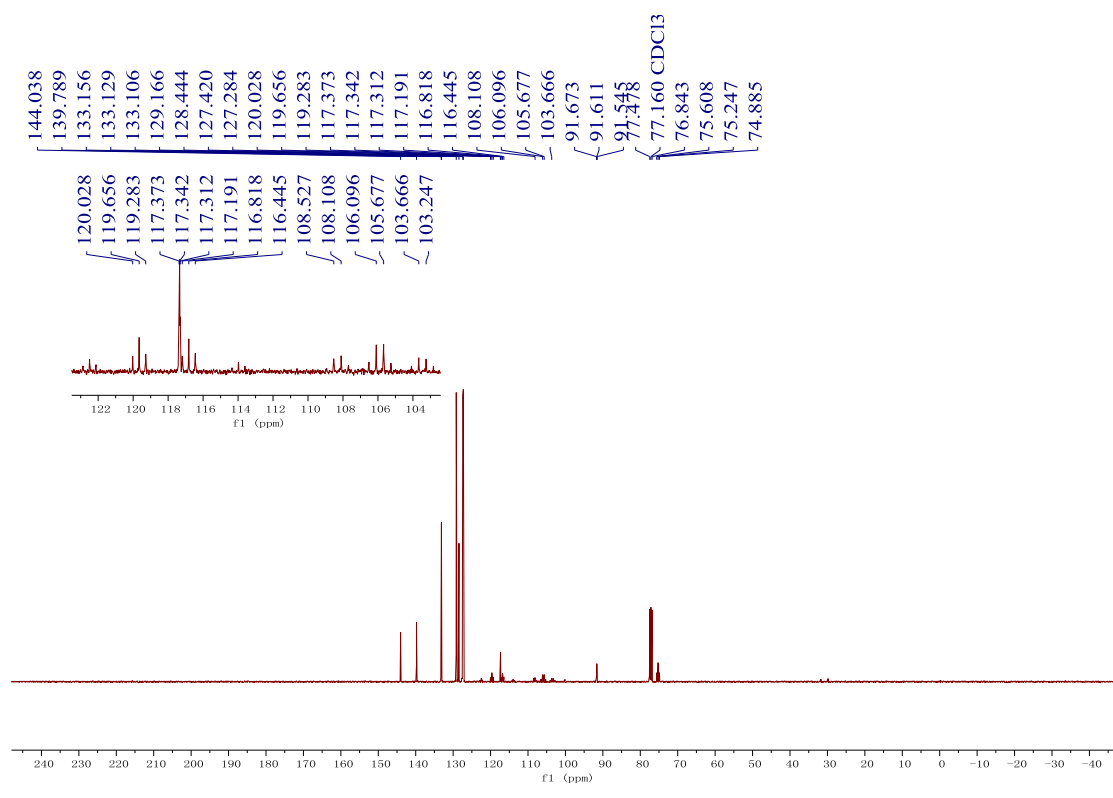

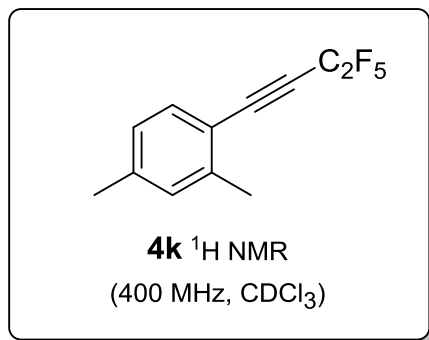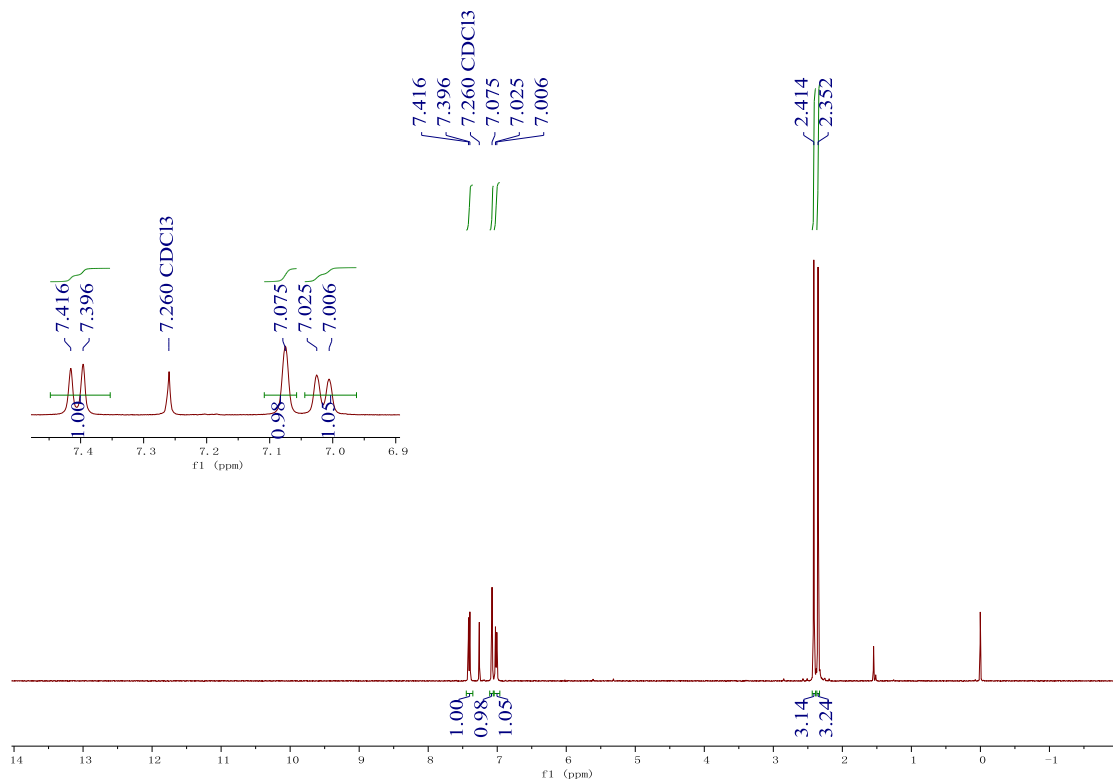

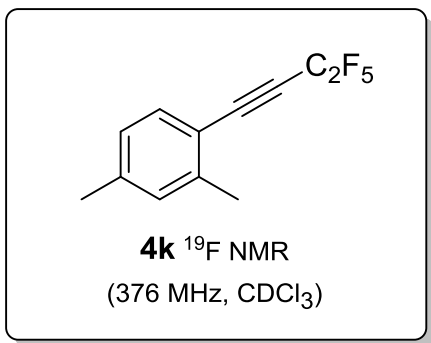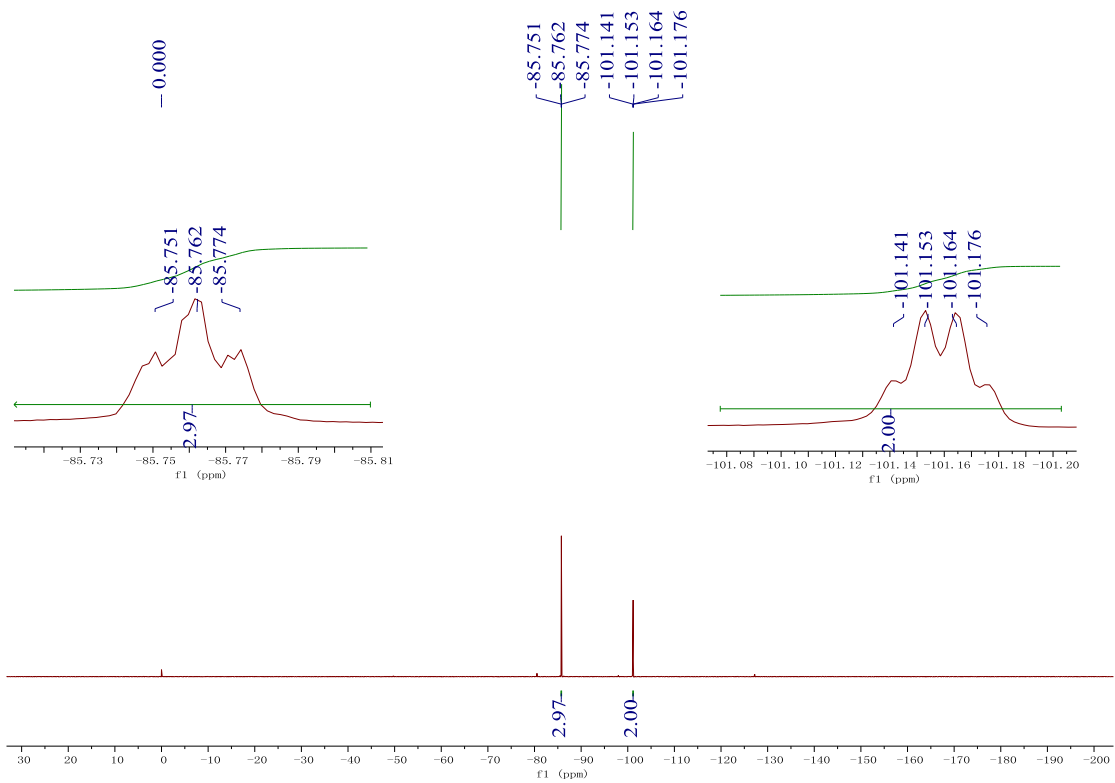

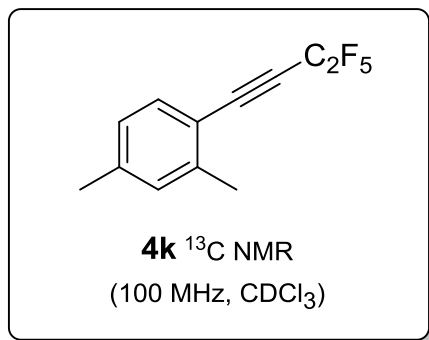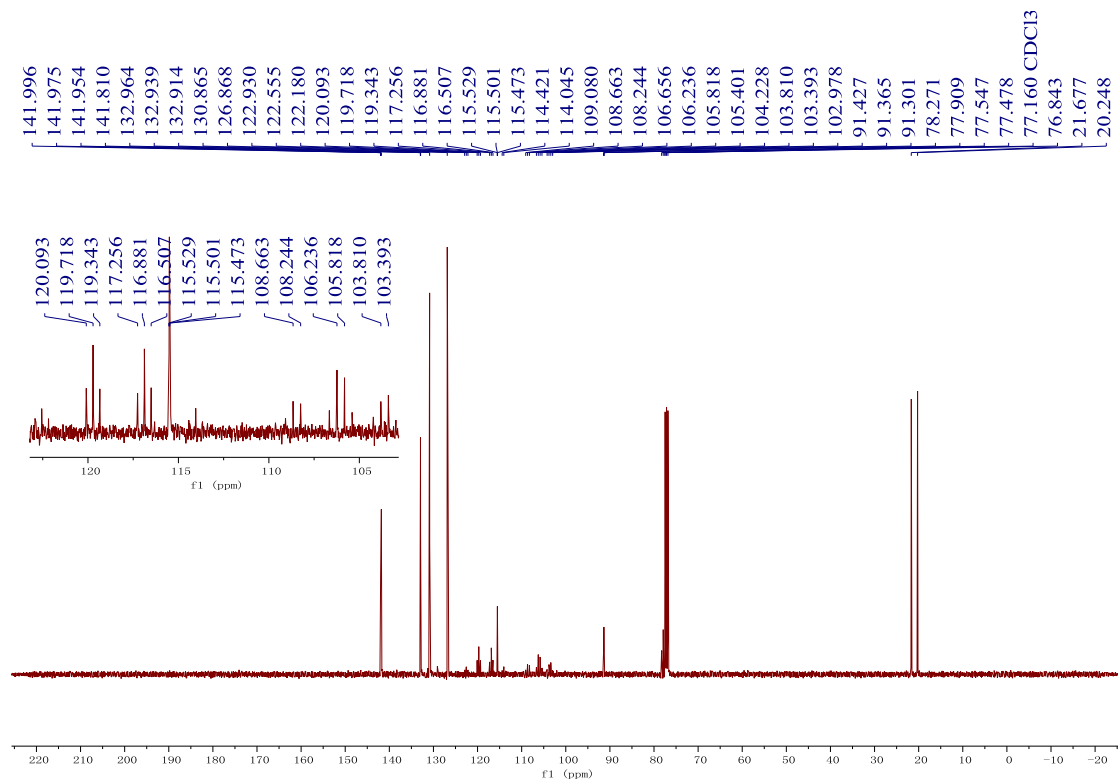

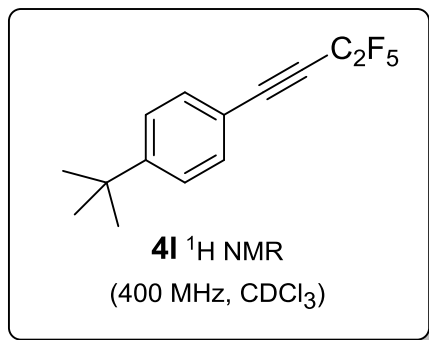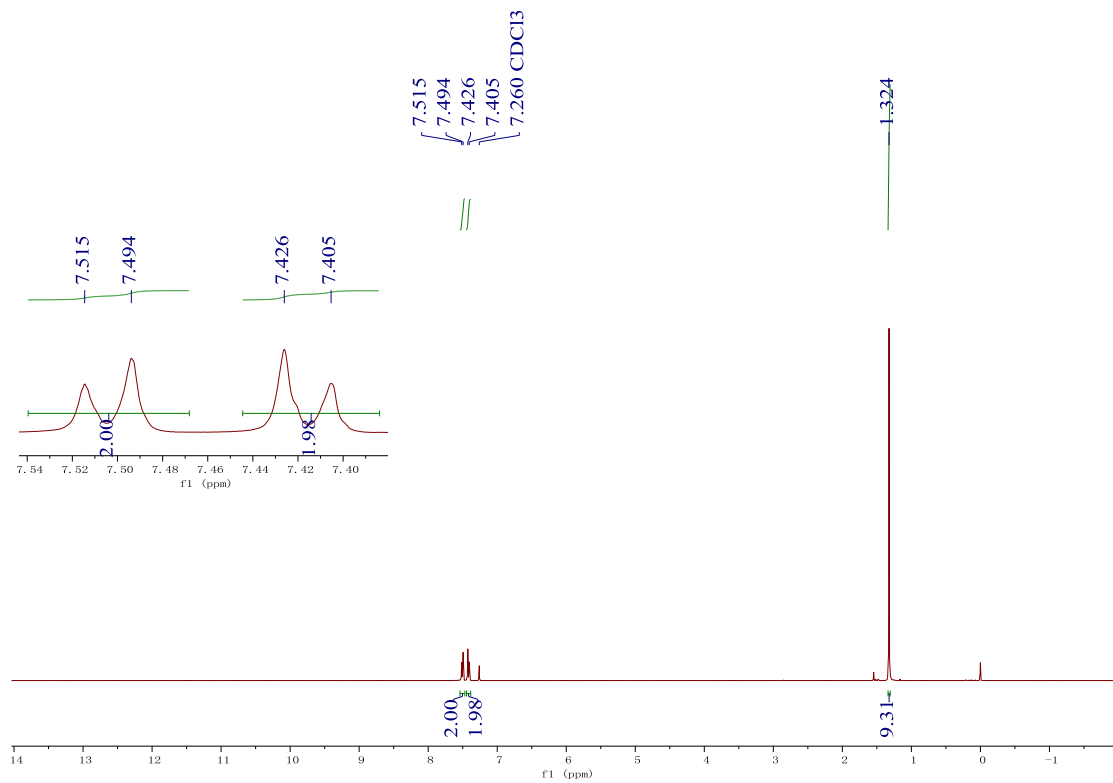

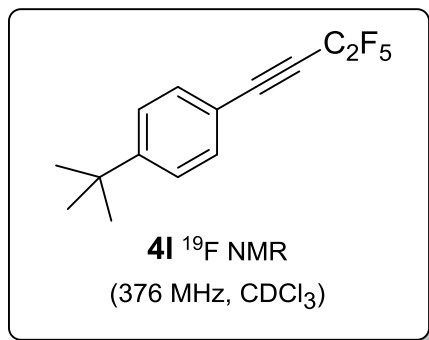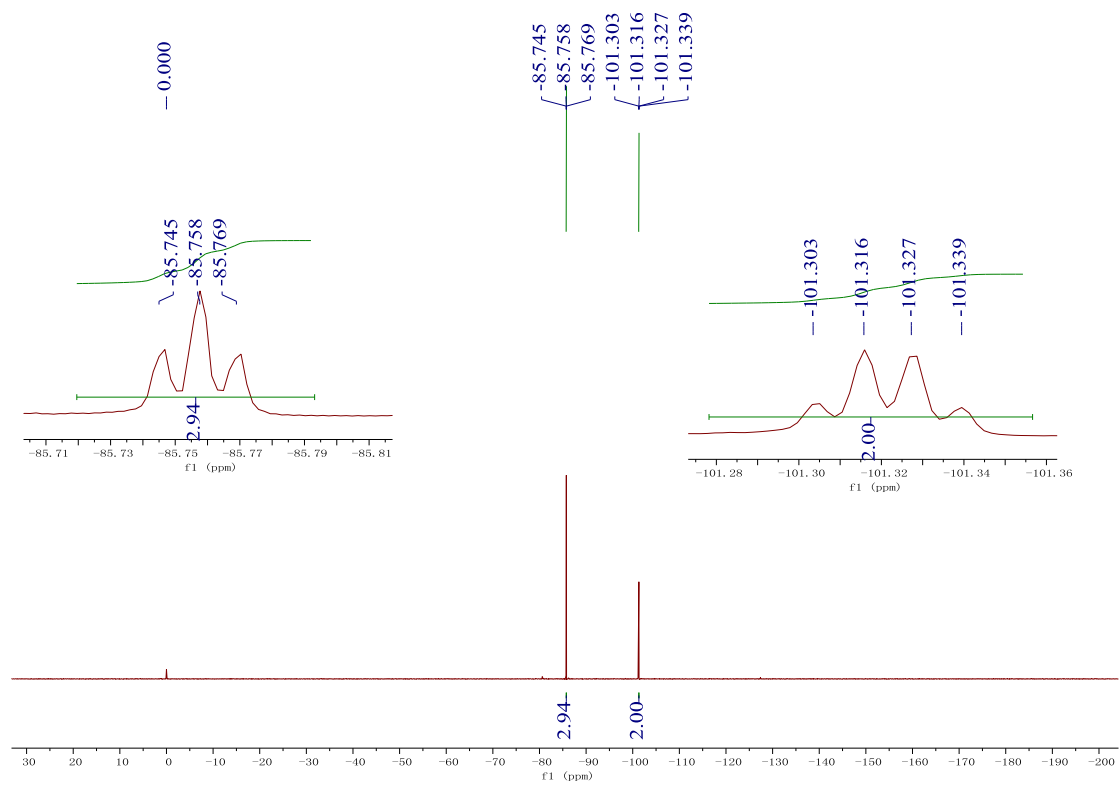



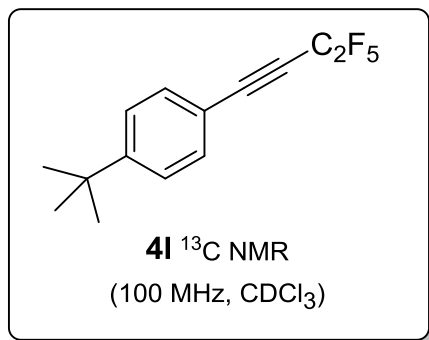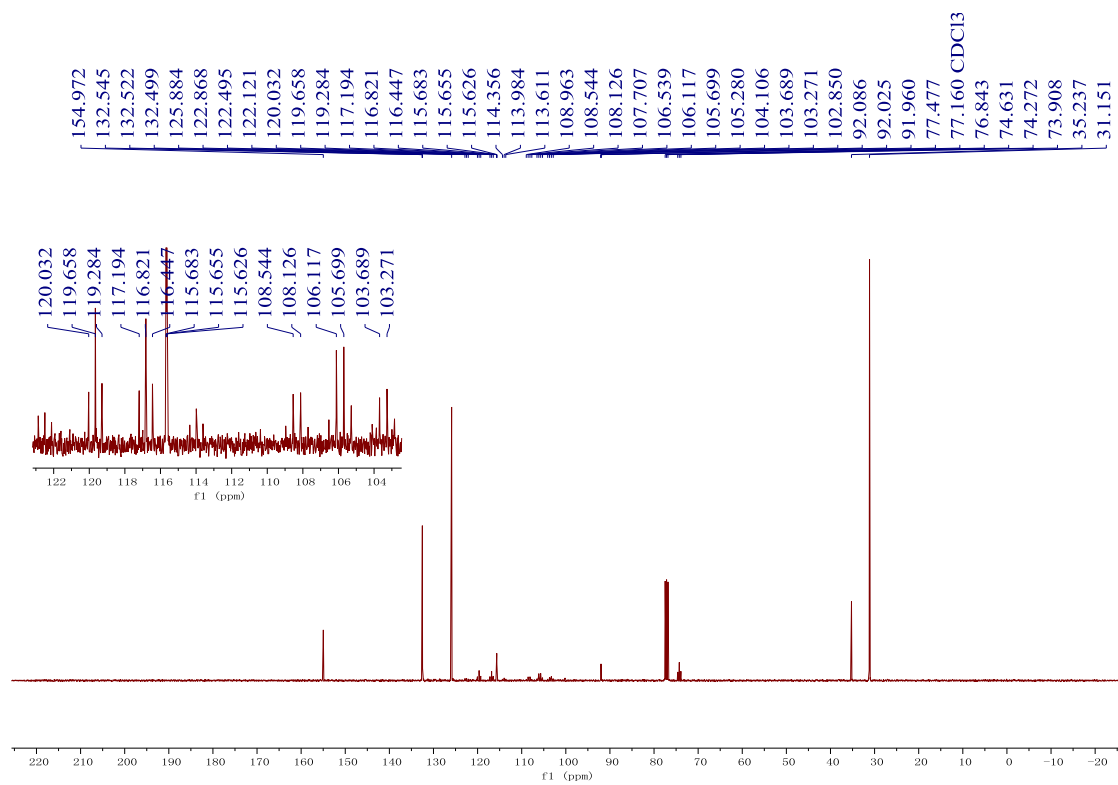

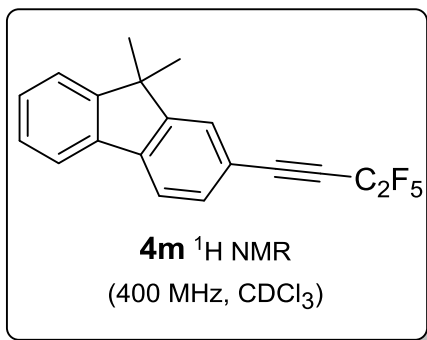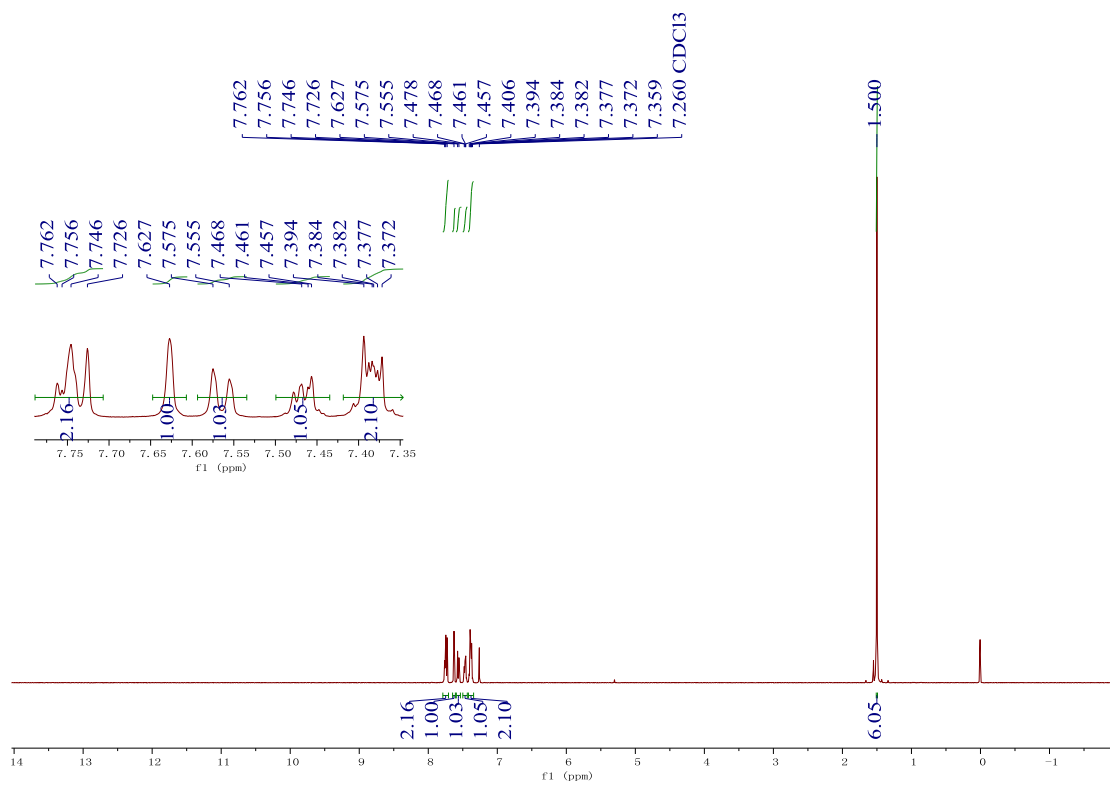

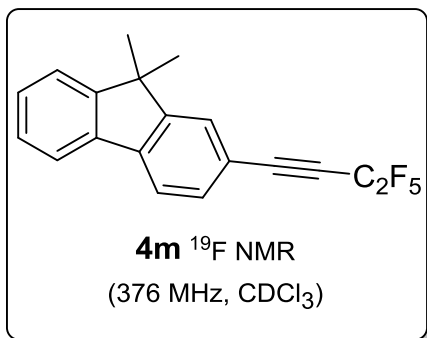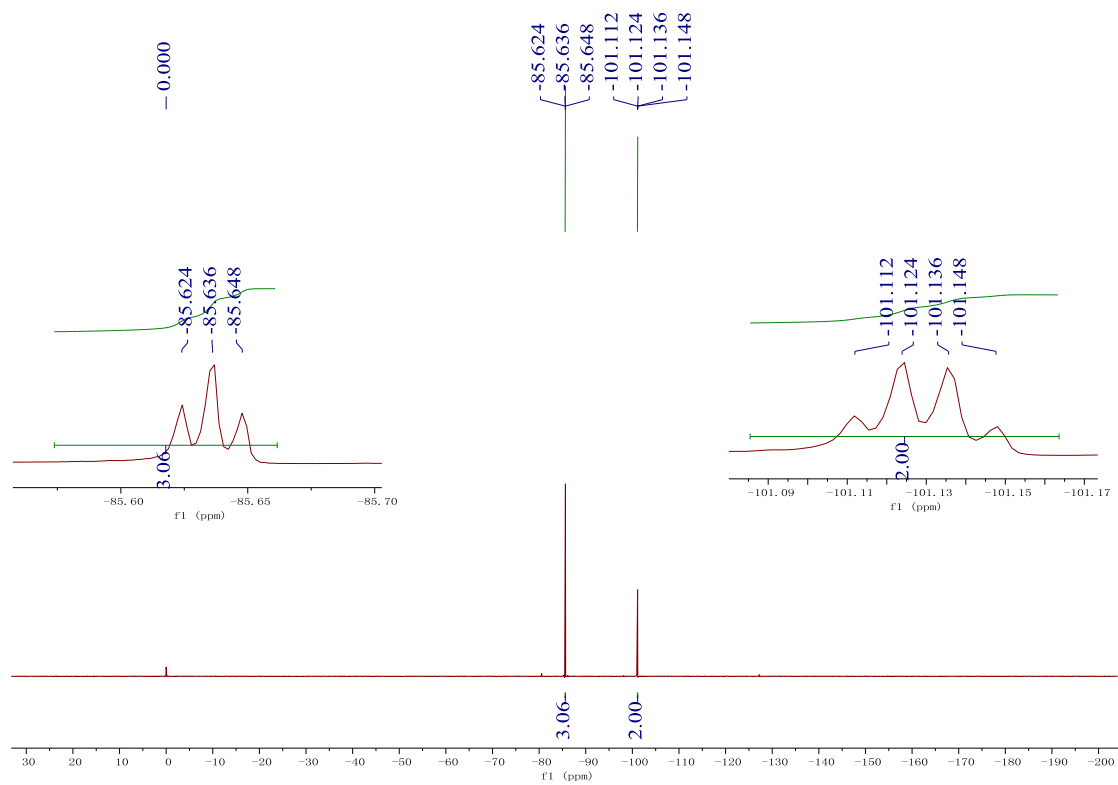

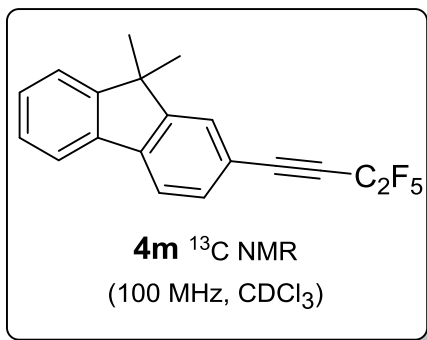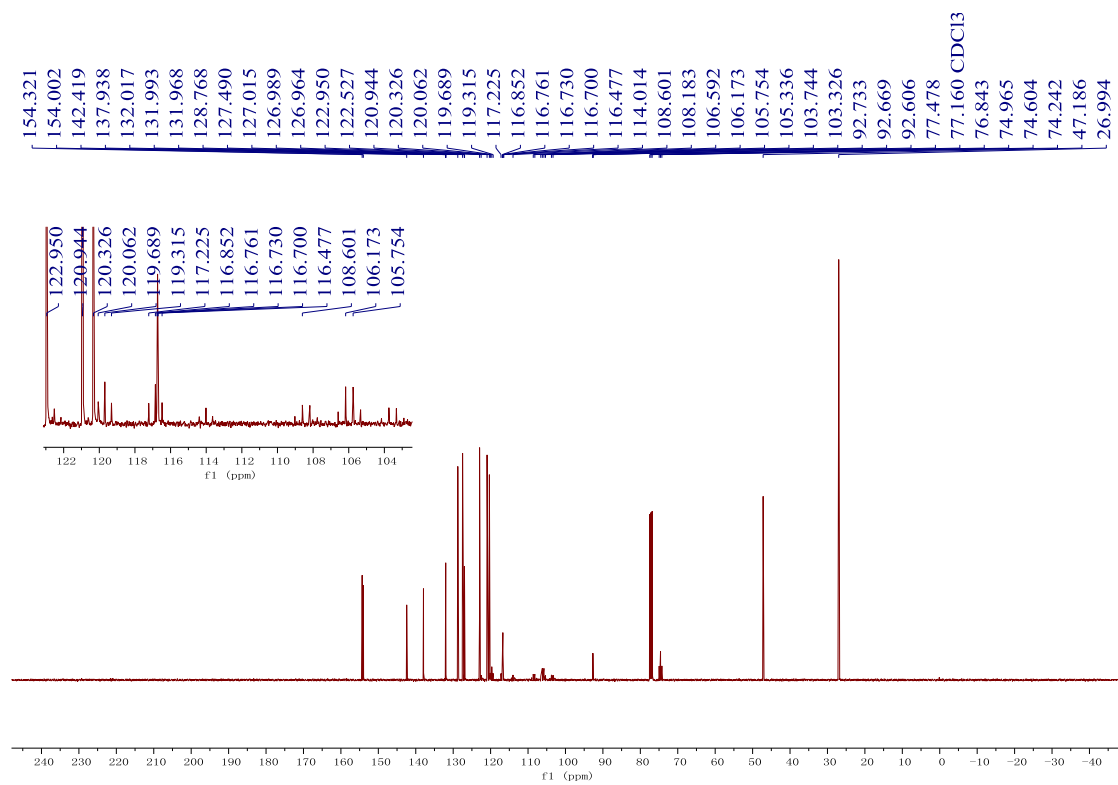

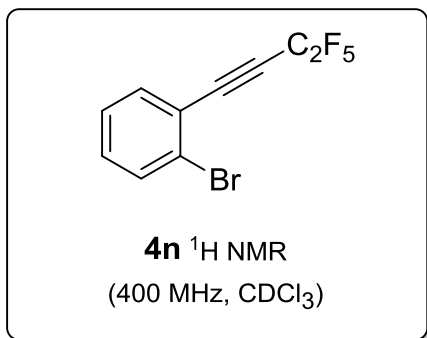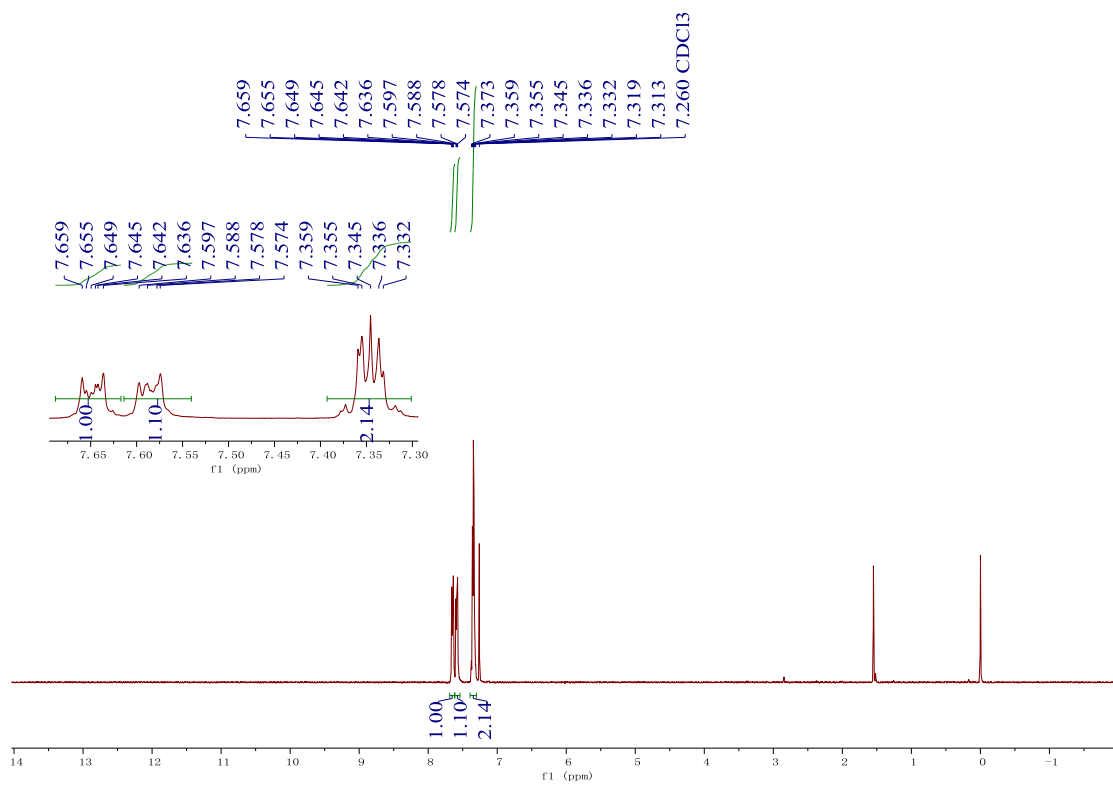

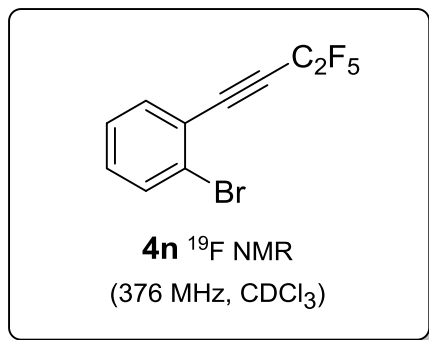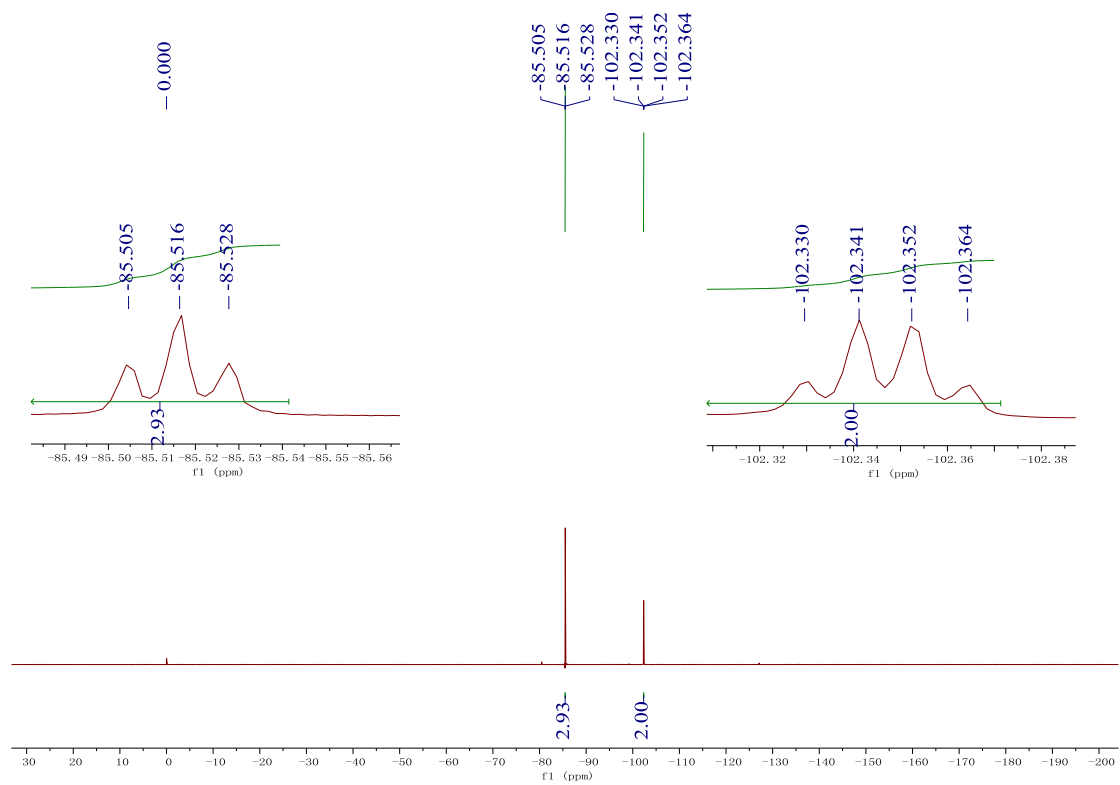

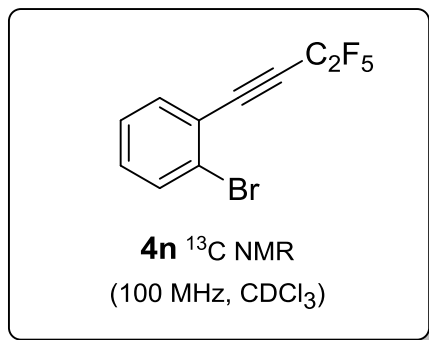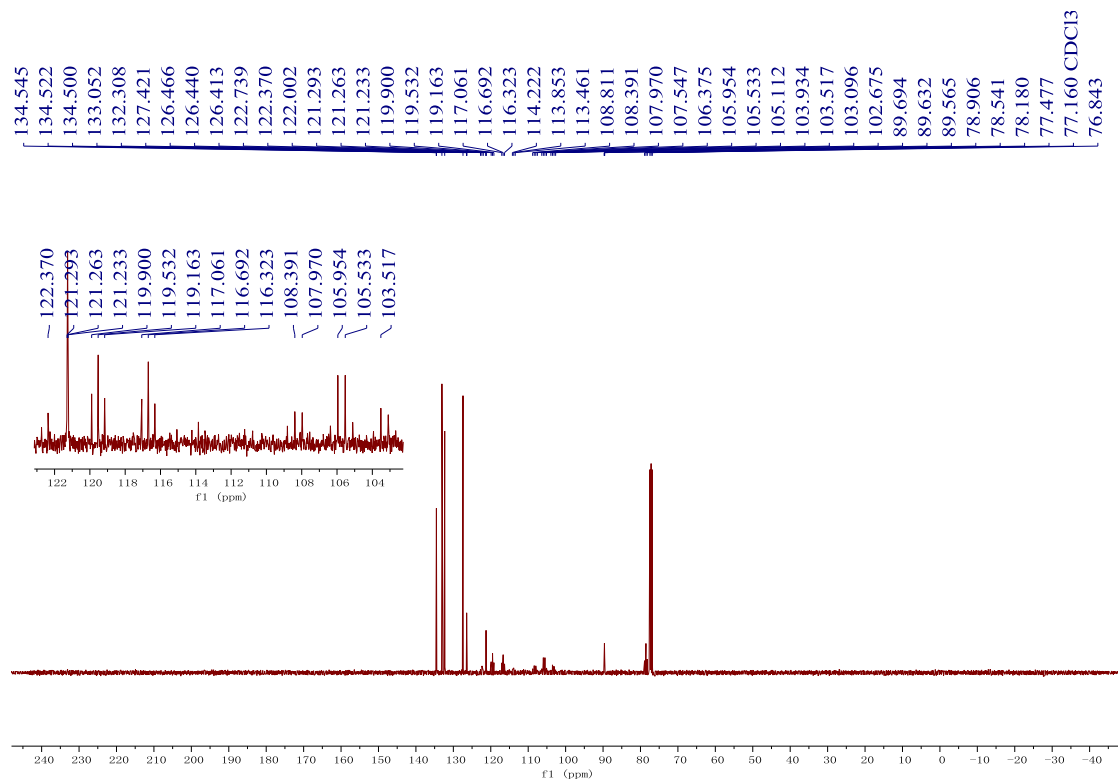

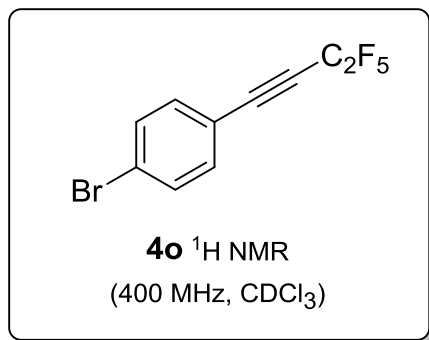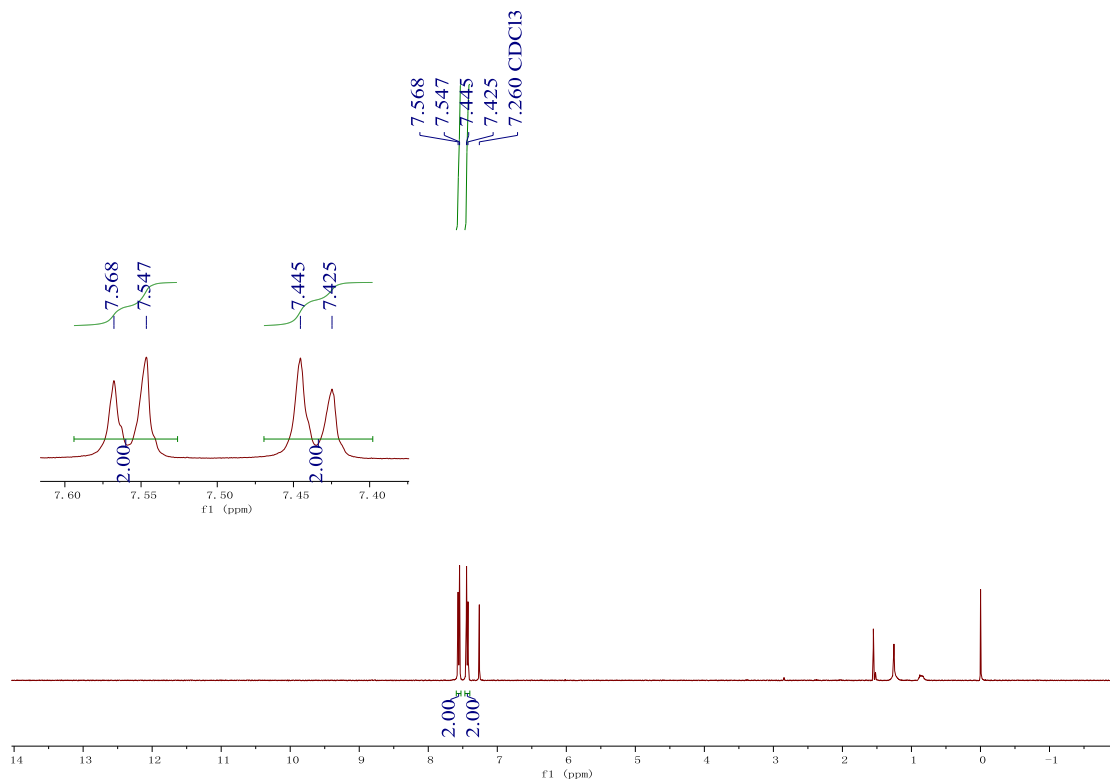



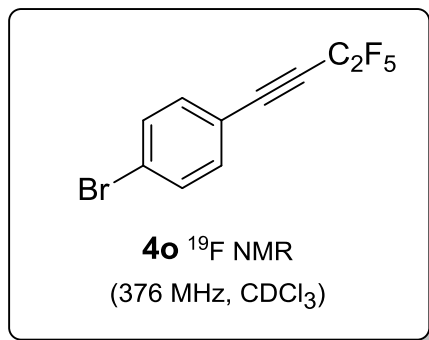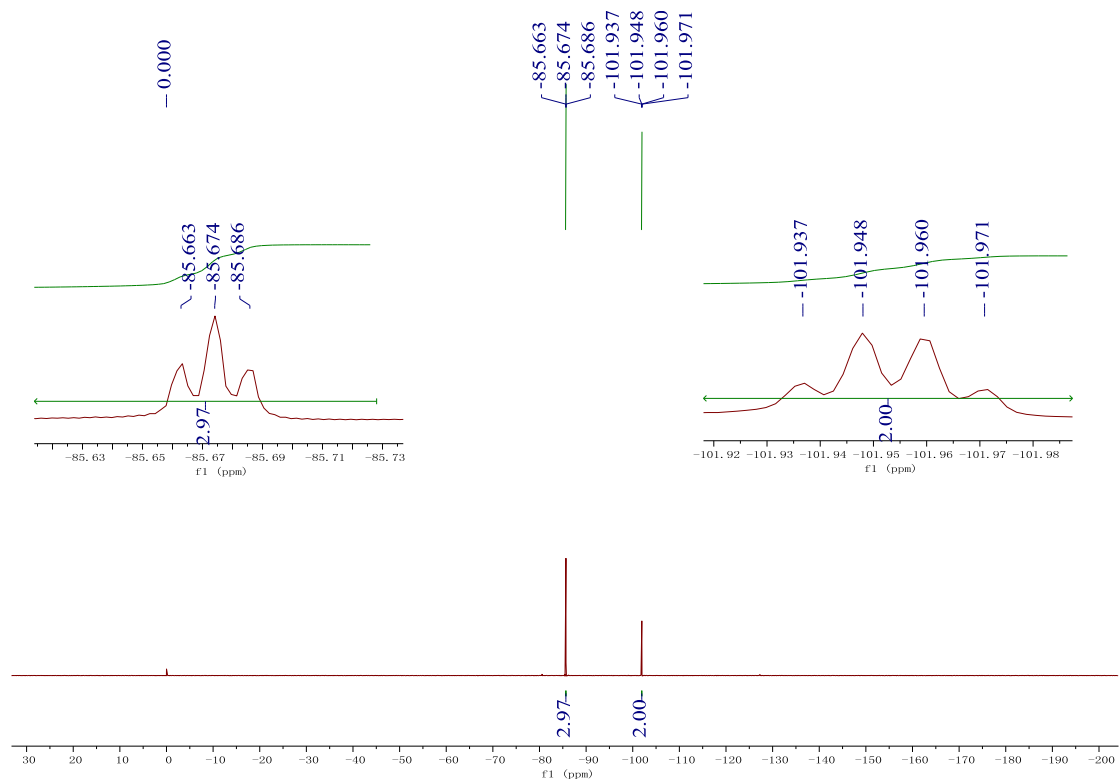

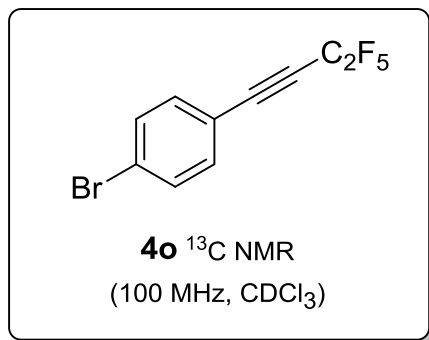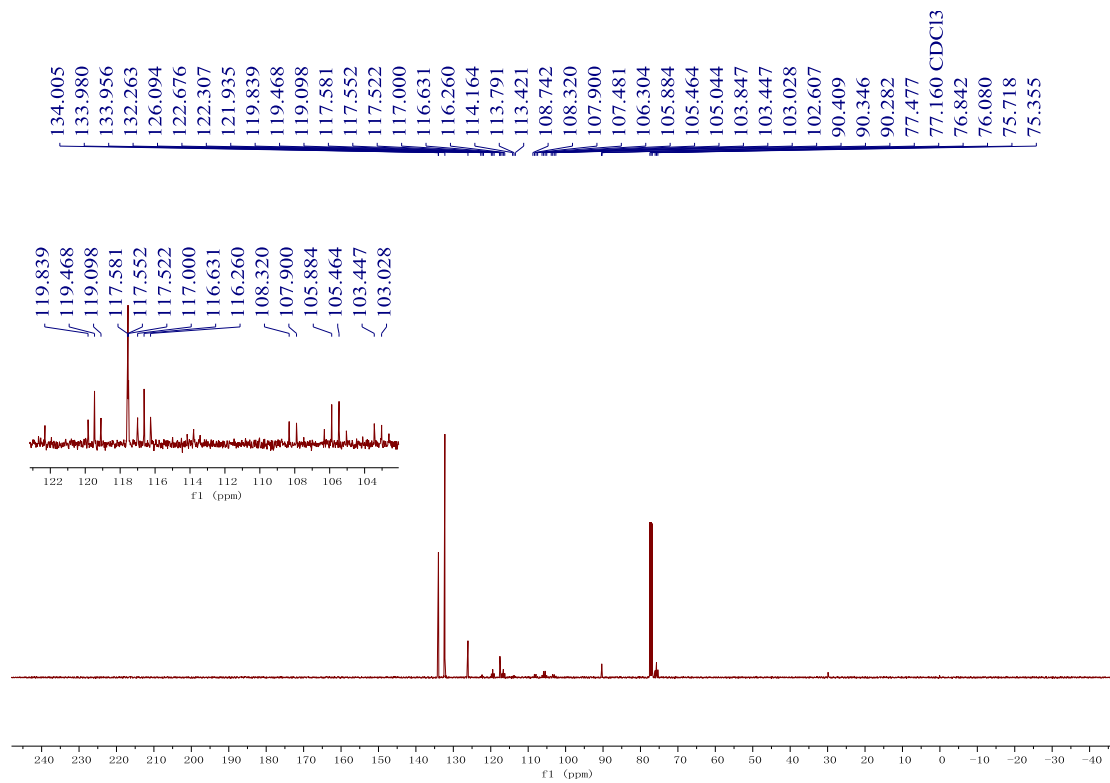

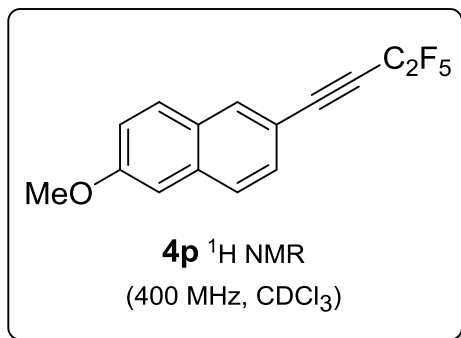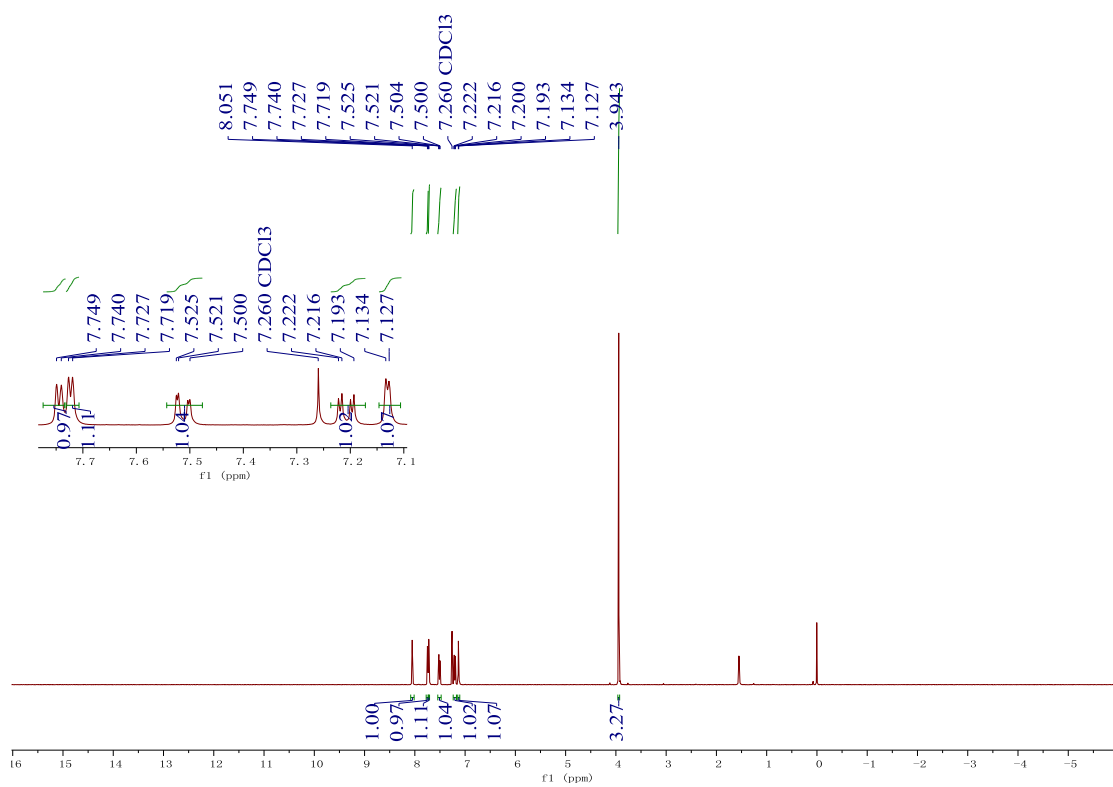

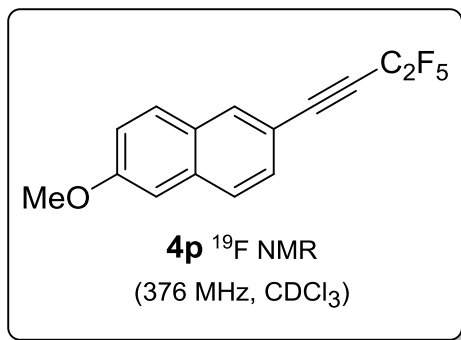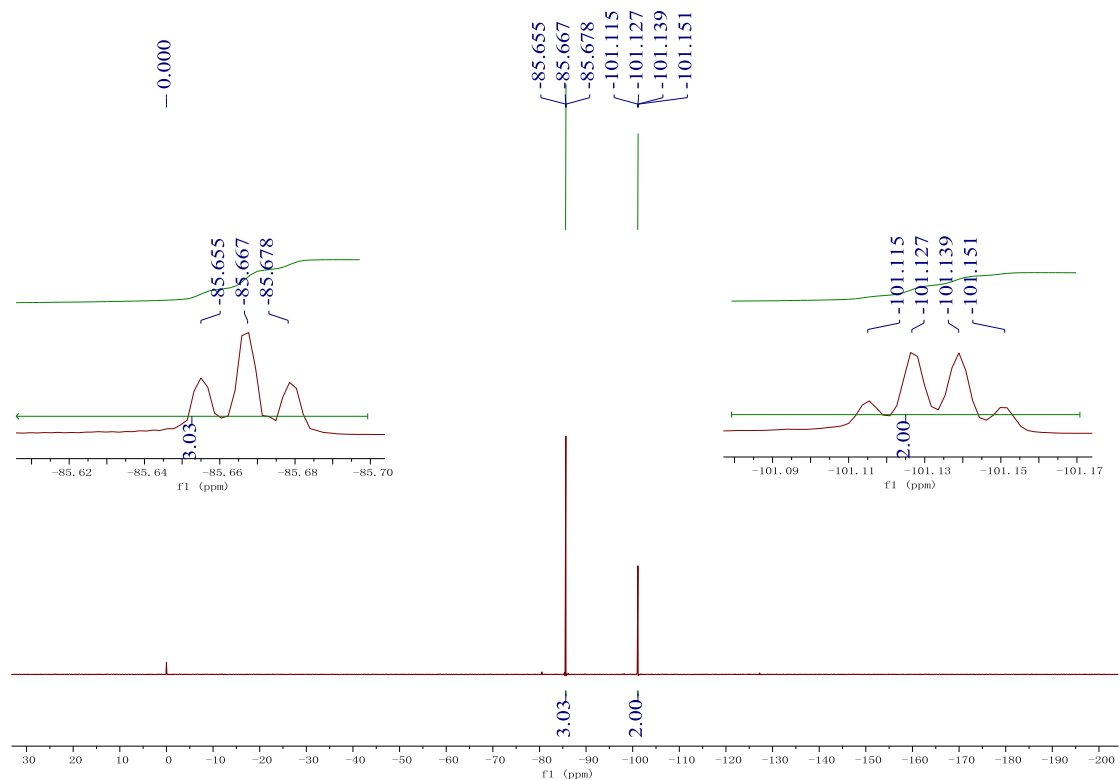

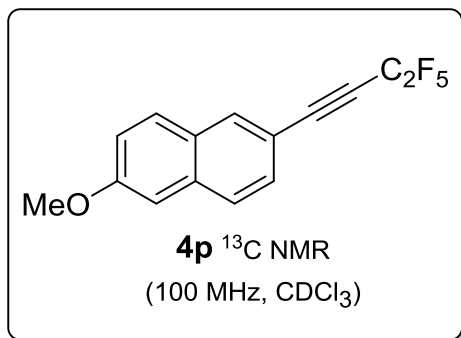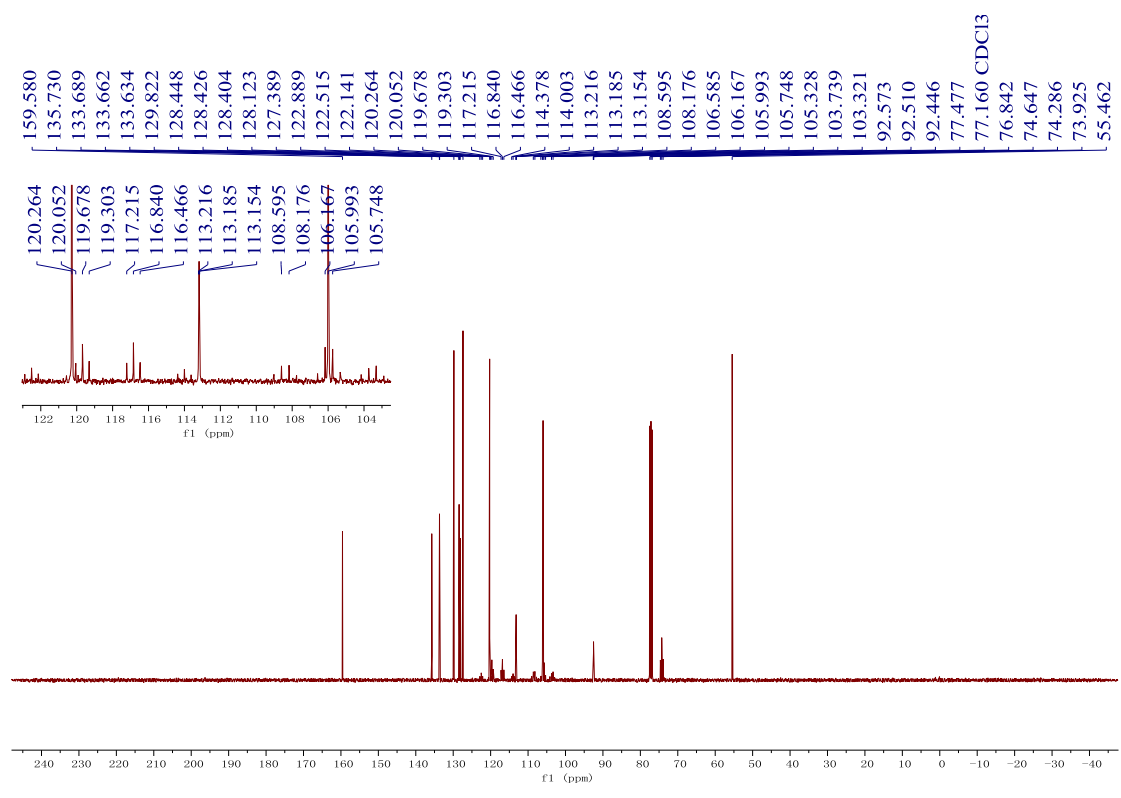

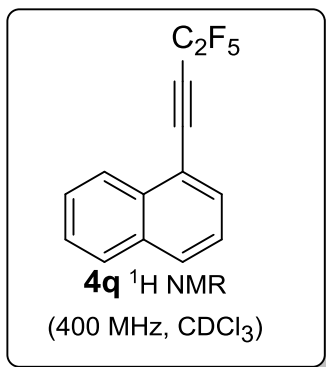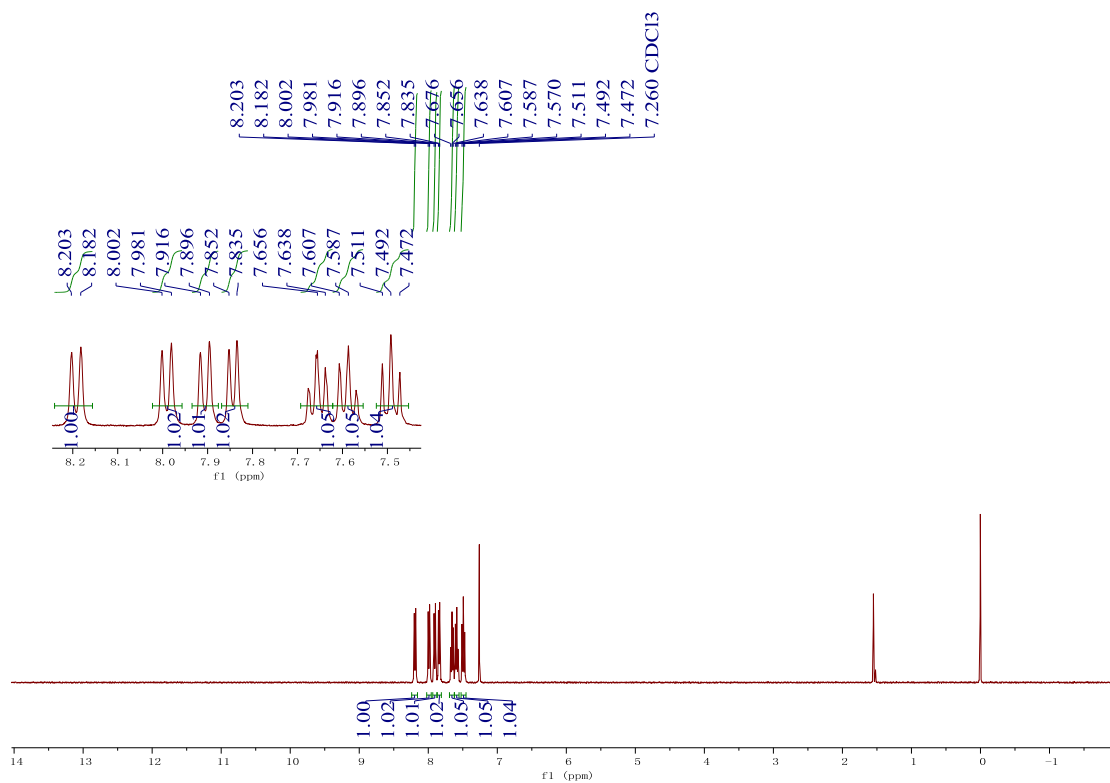

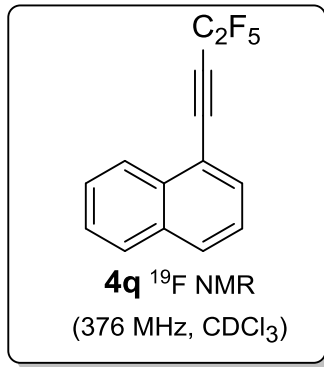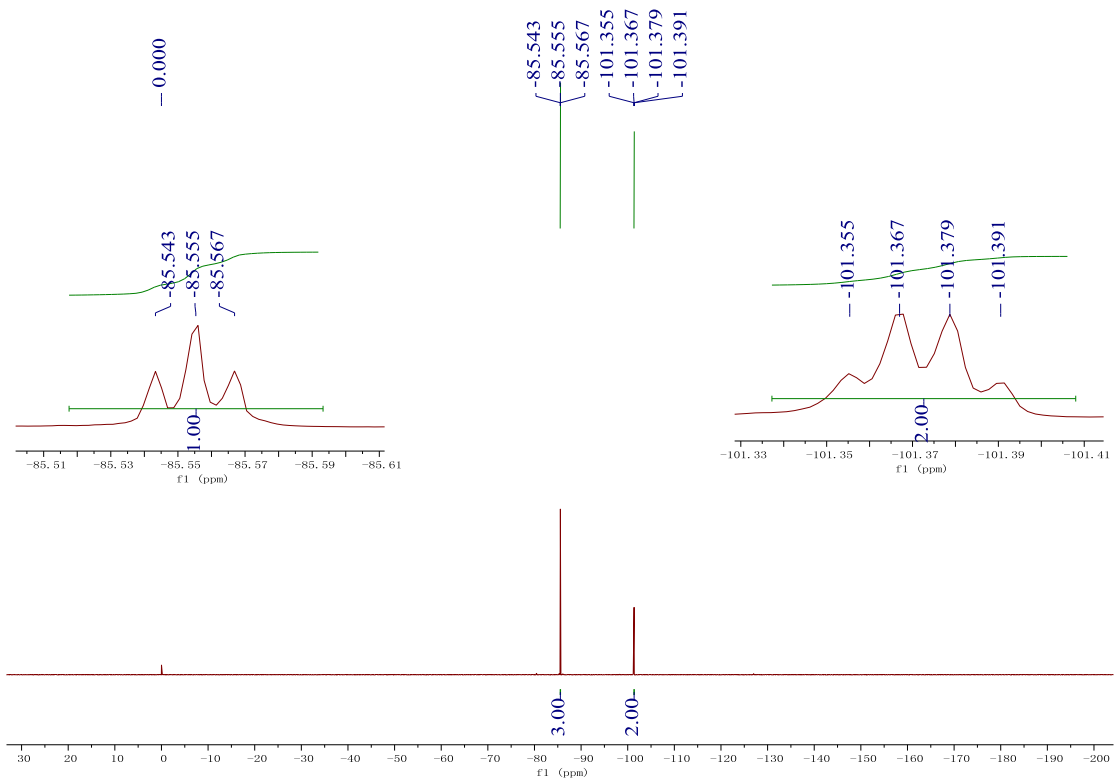

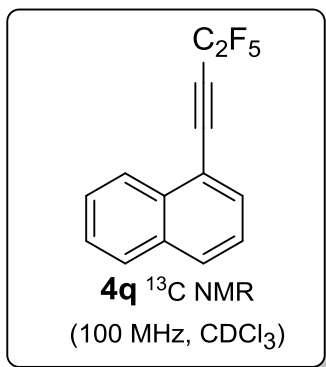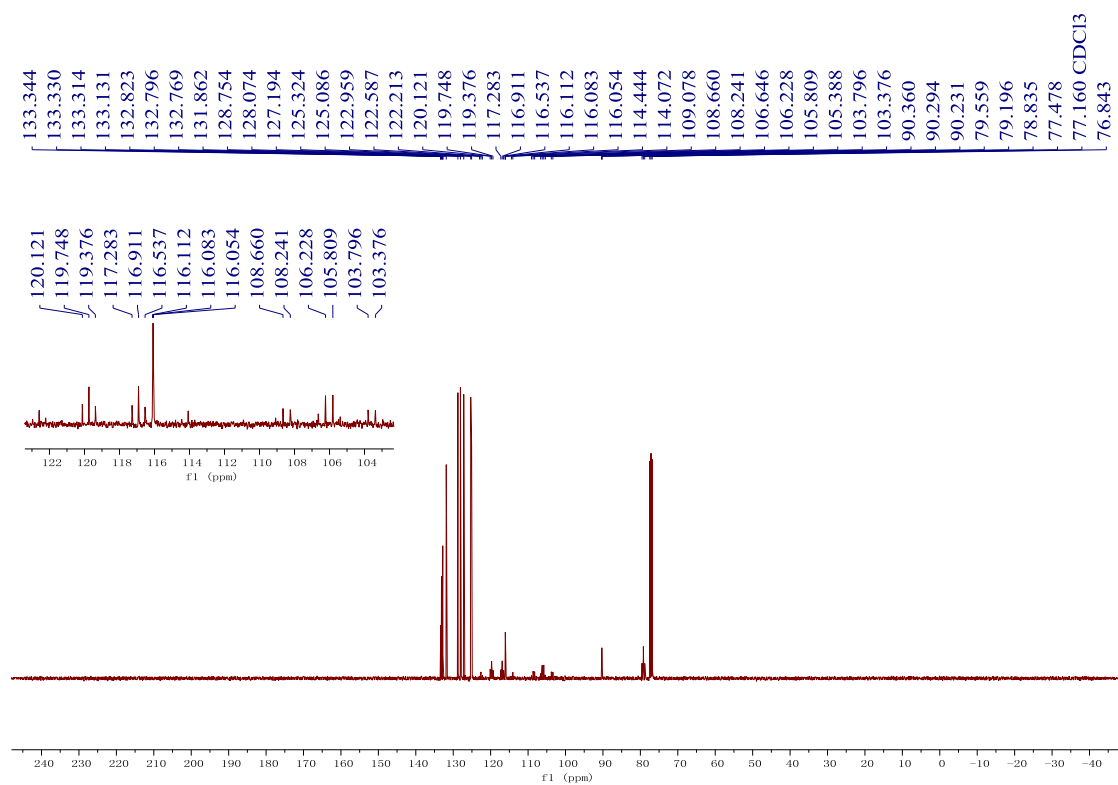





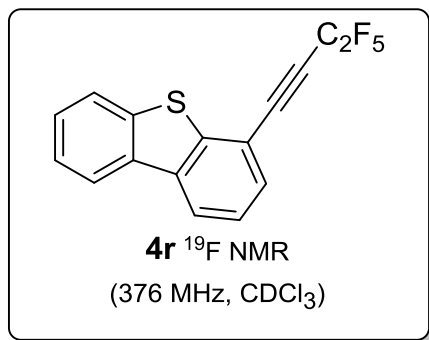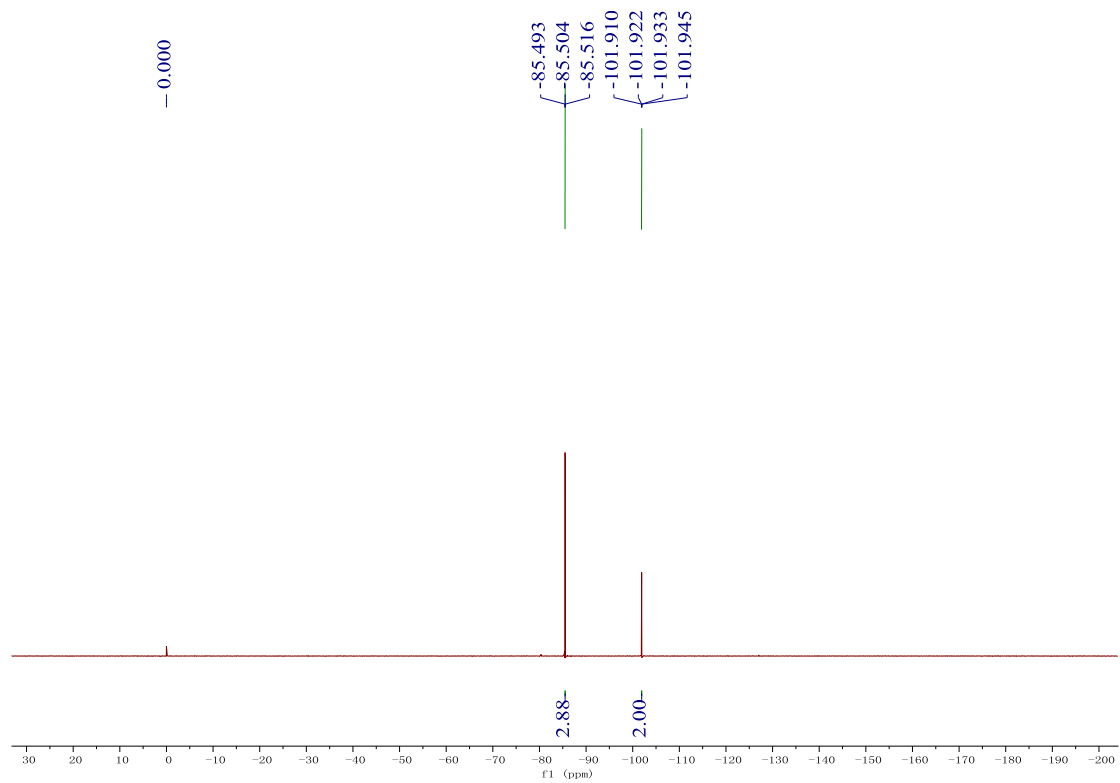

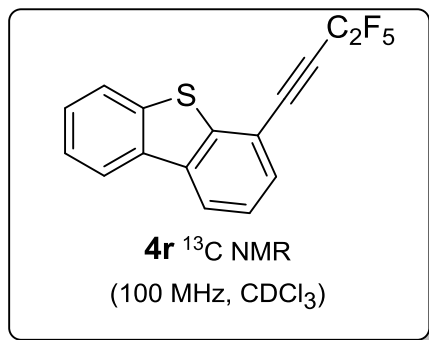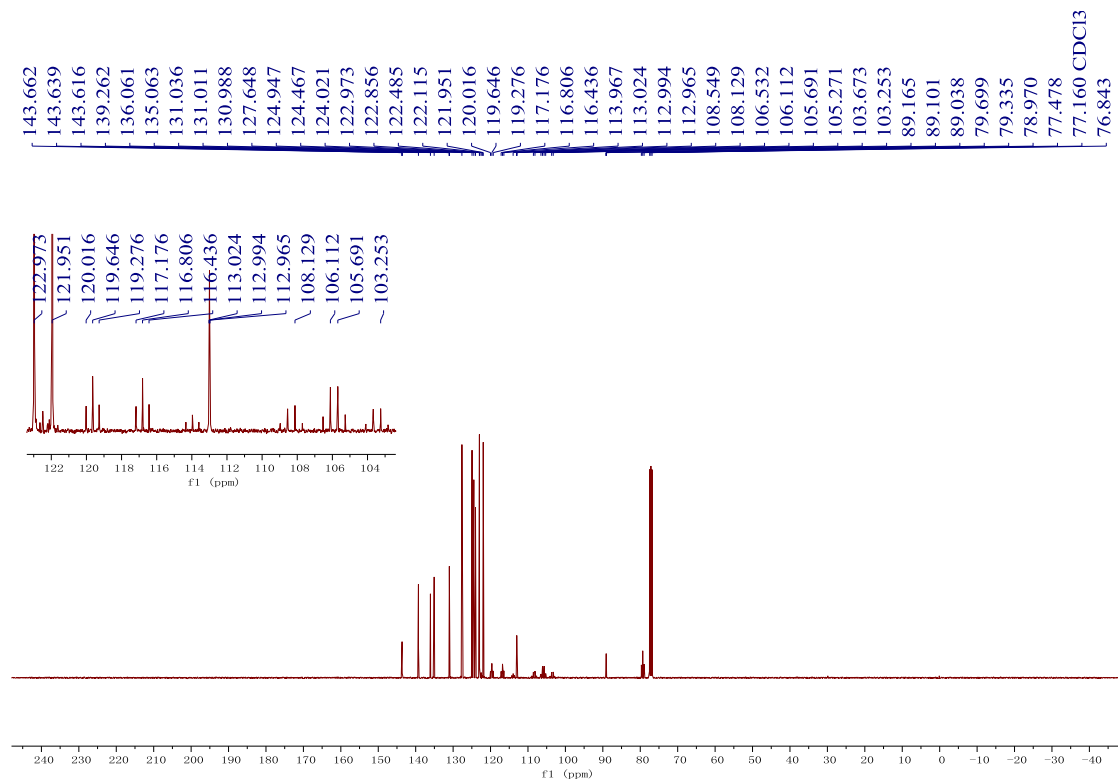

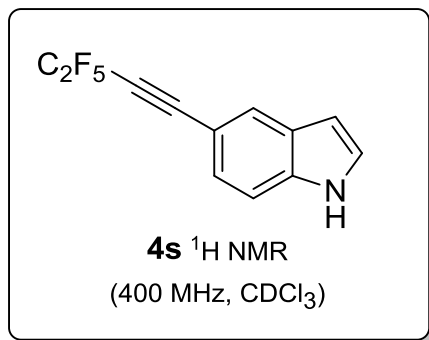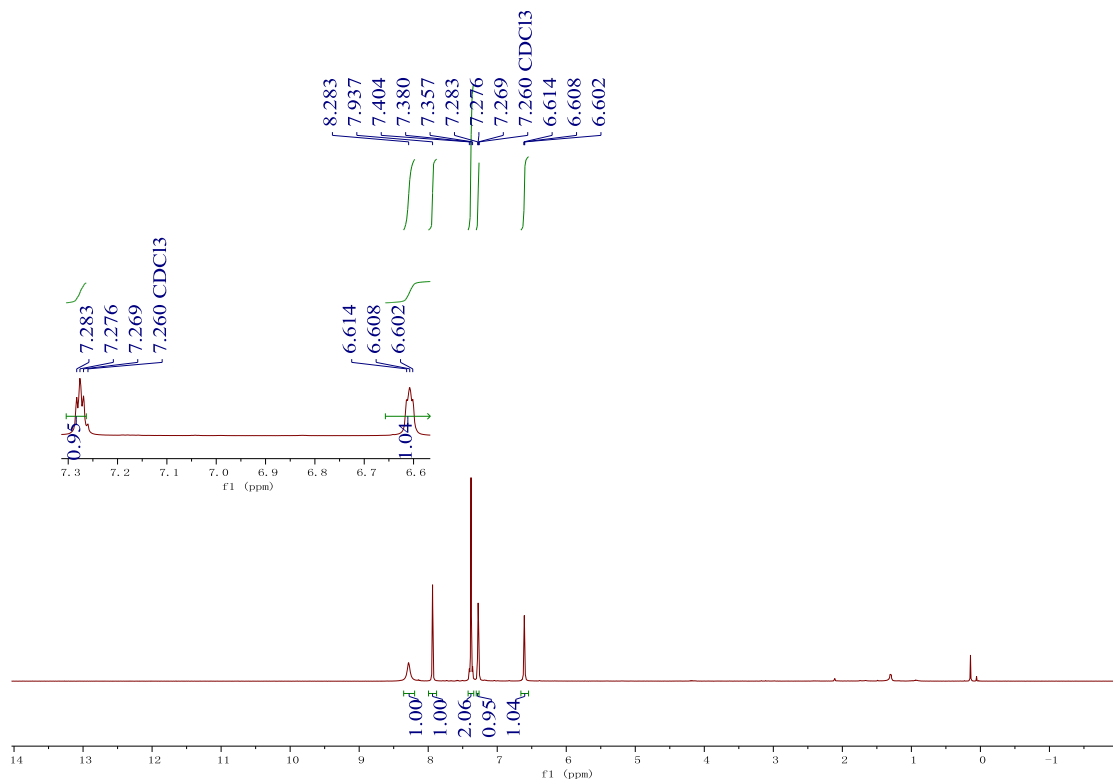

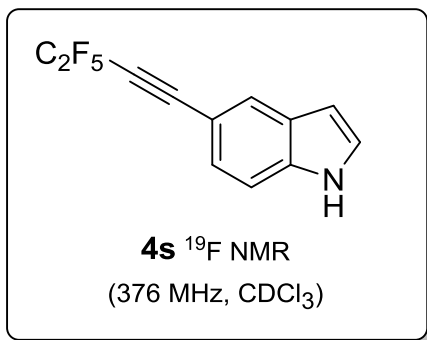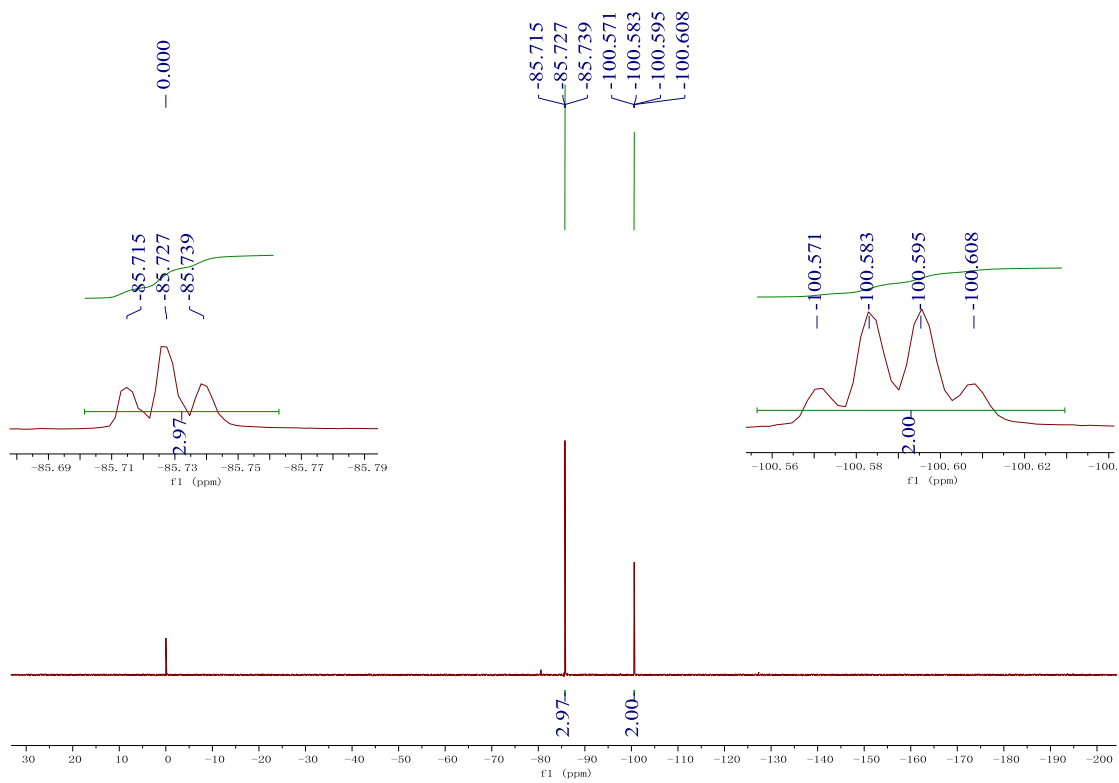

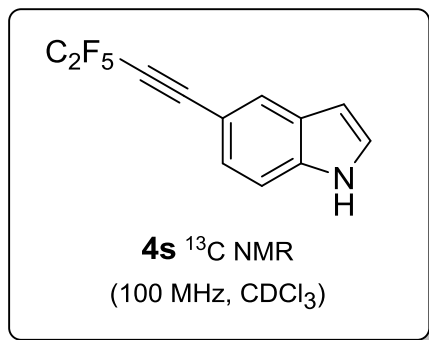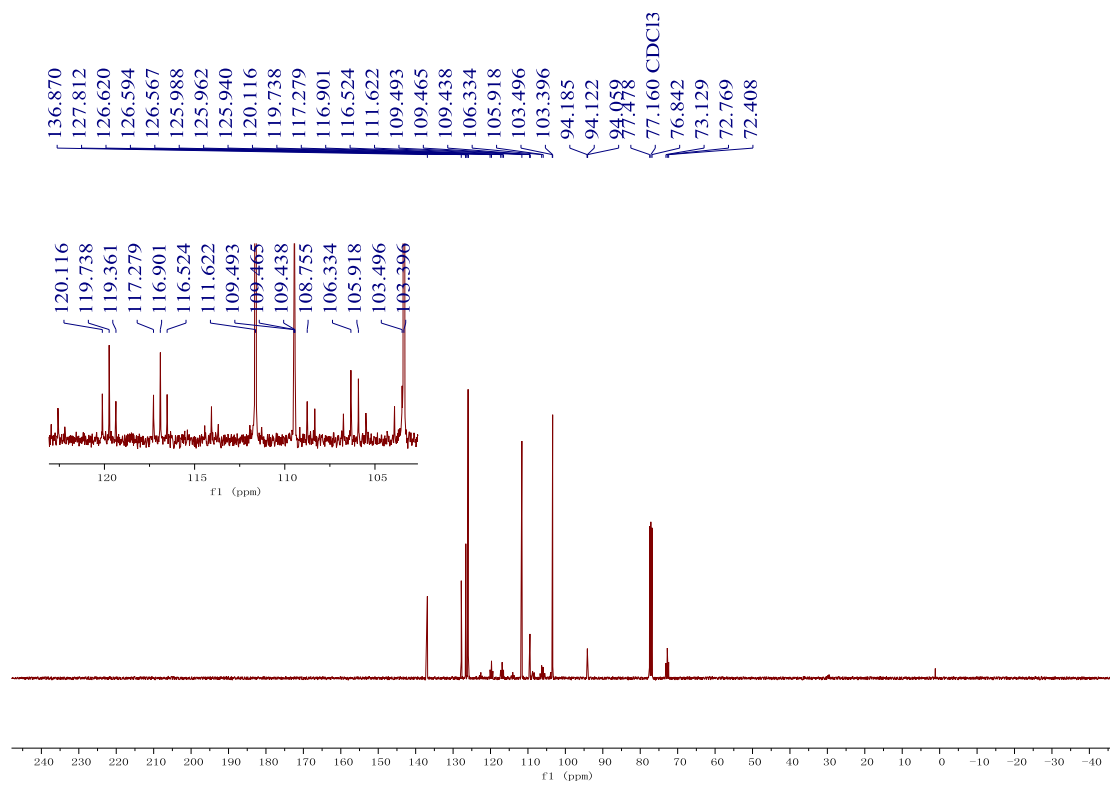

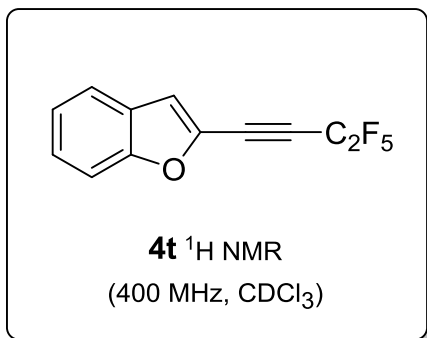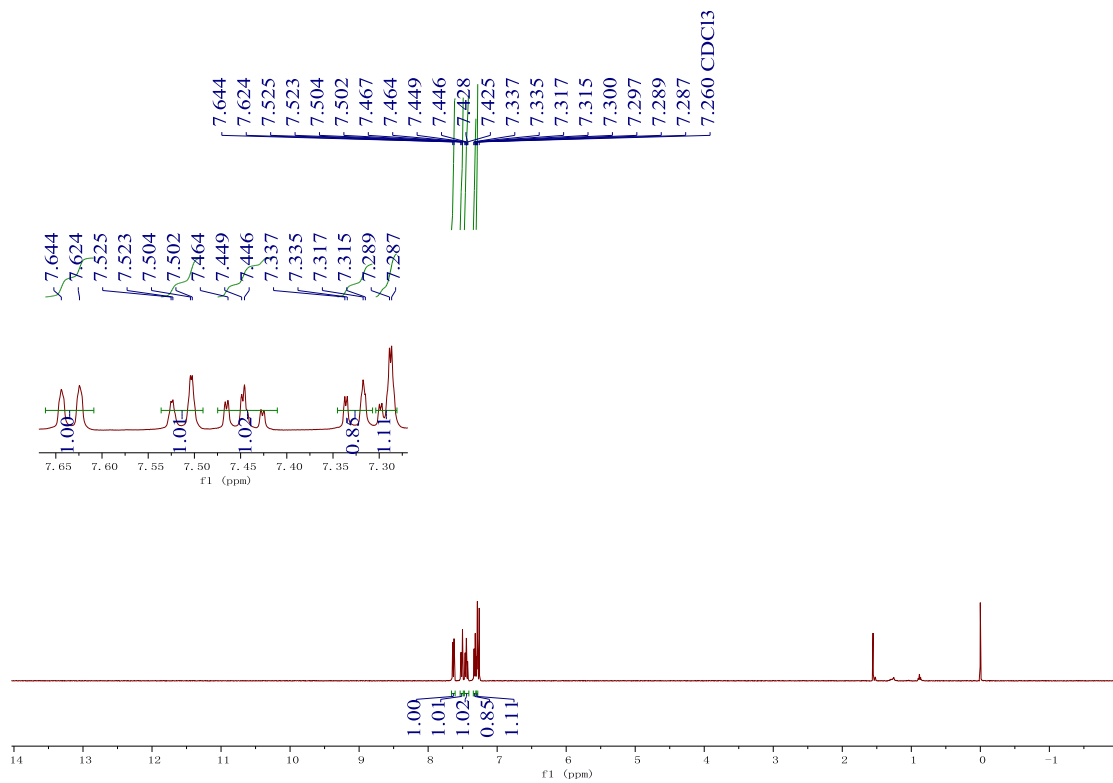

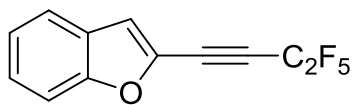

**4t**  $^{19}\text{F}$  NMR  
(376 MHz,  $\text{CDCl}_3$ )

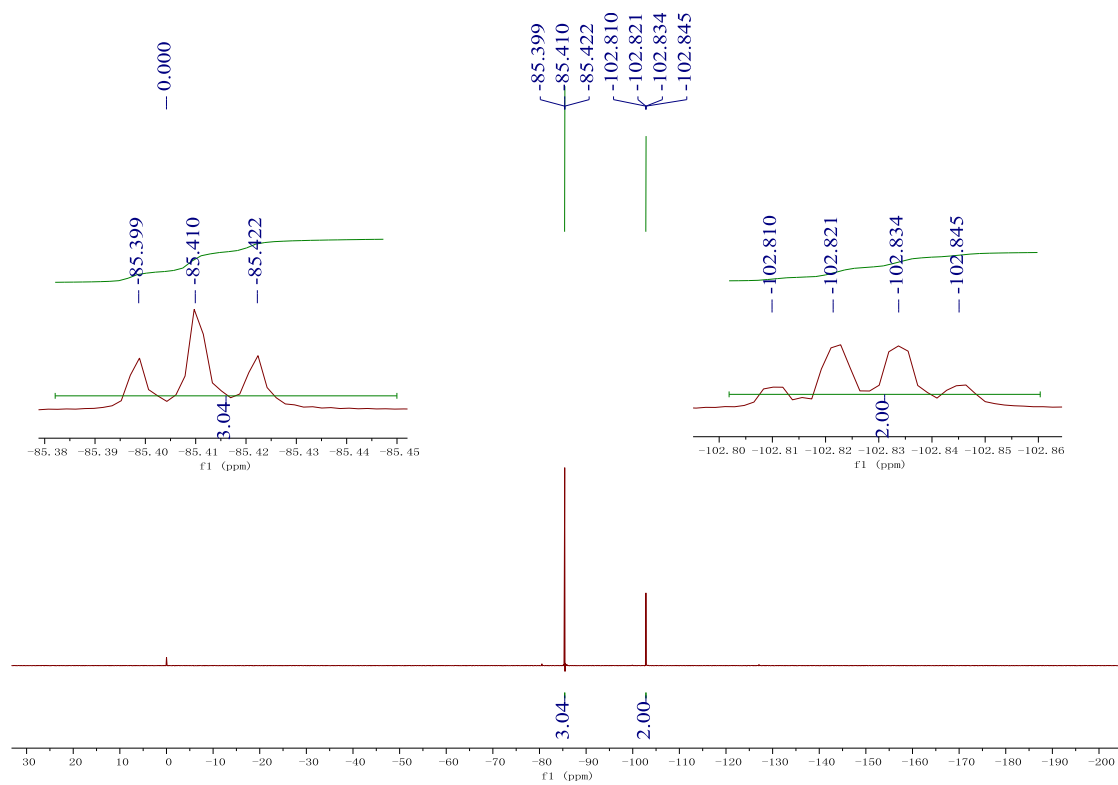



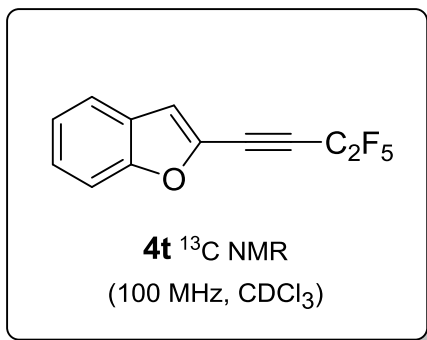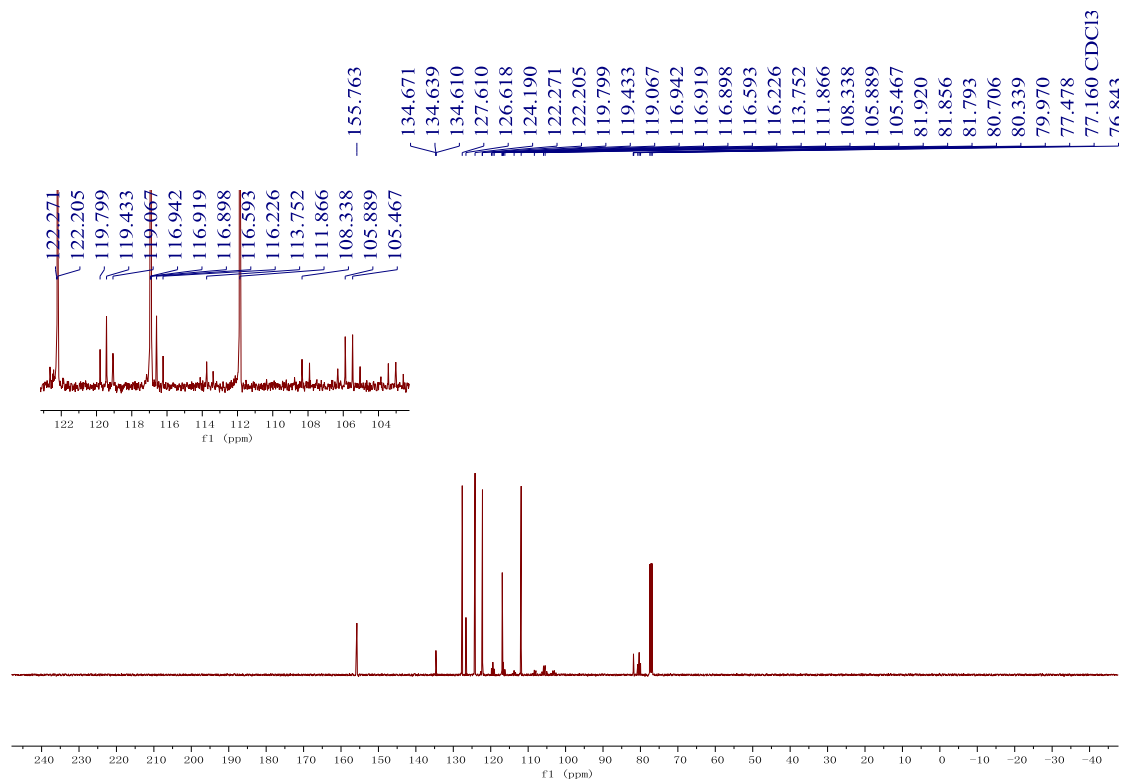

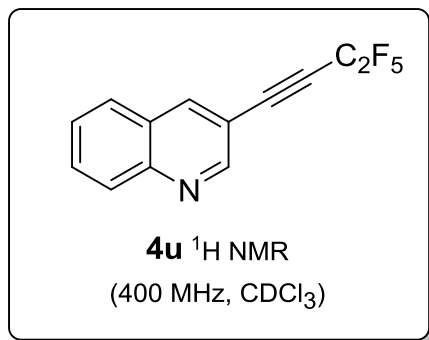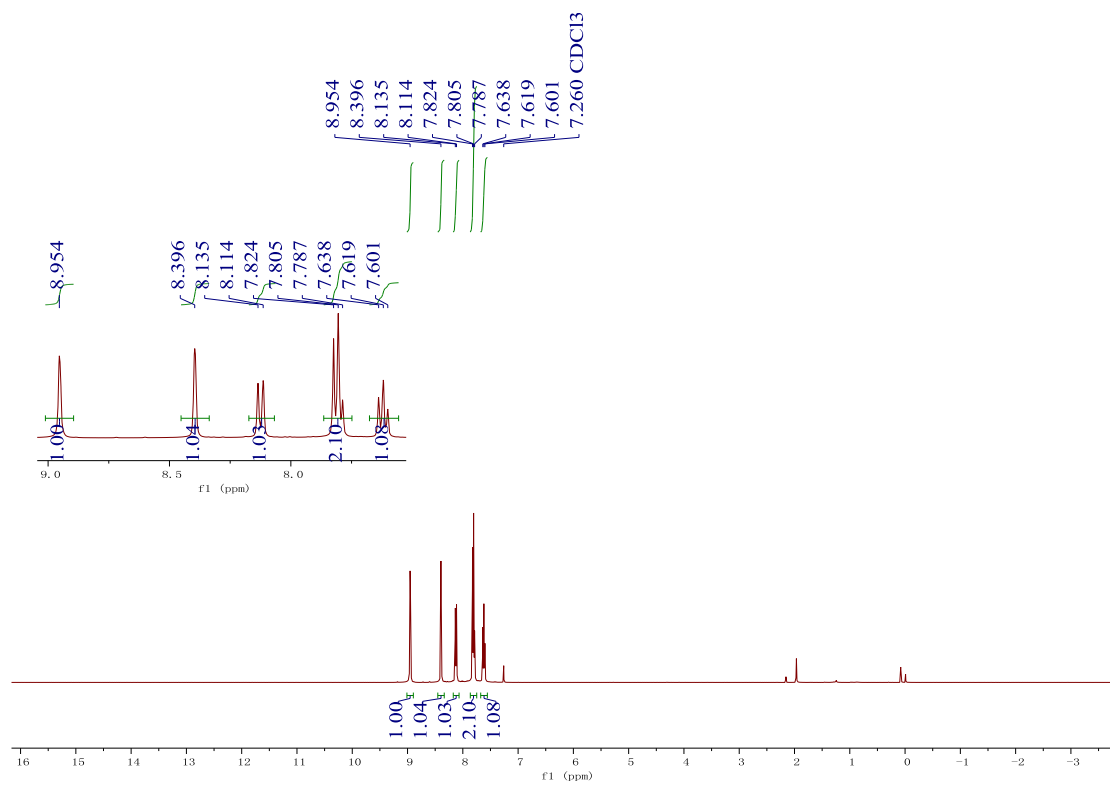

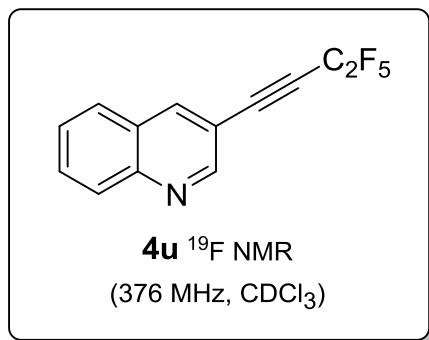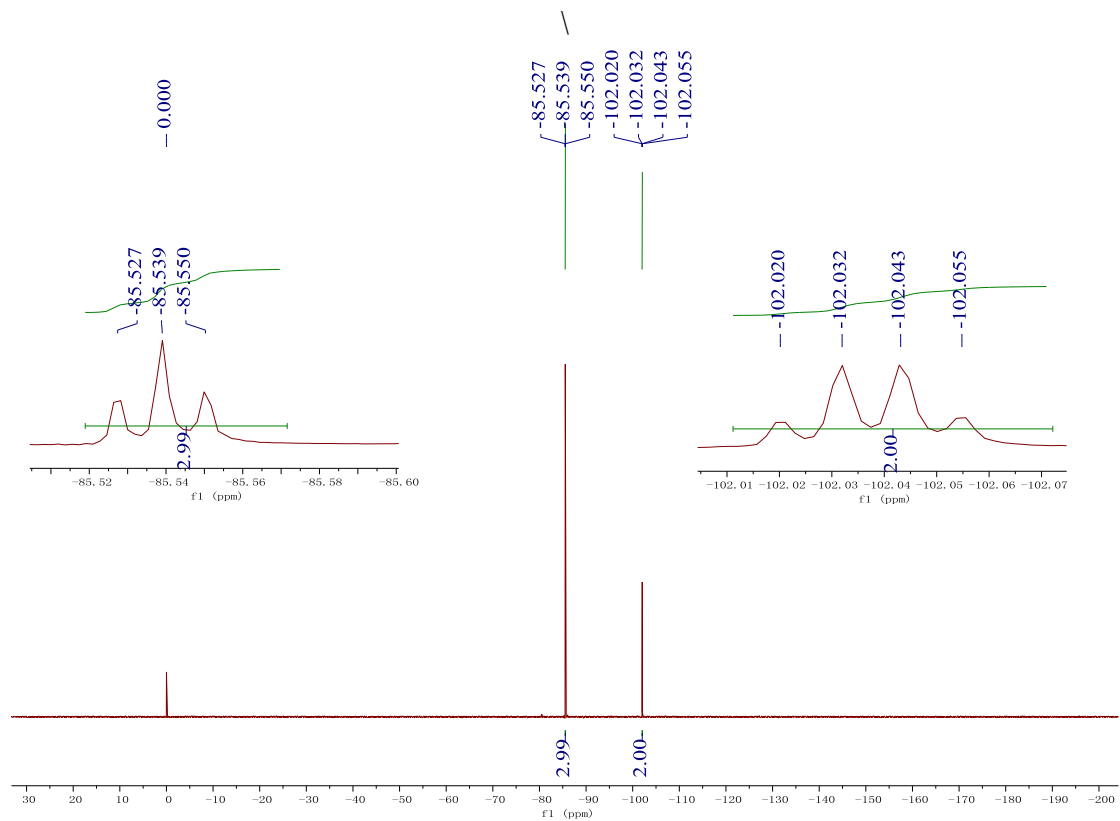

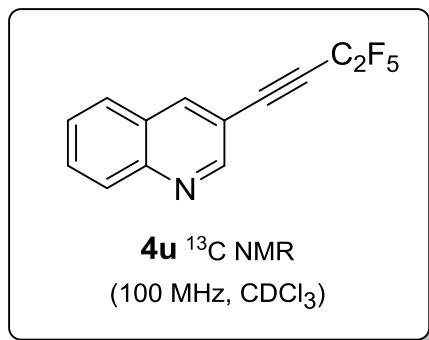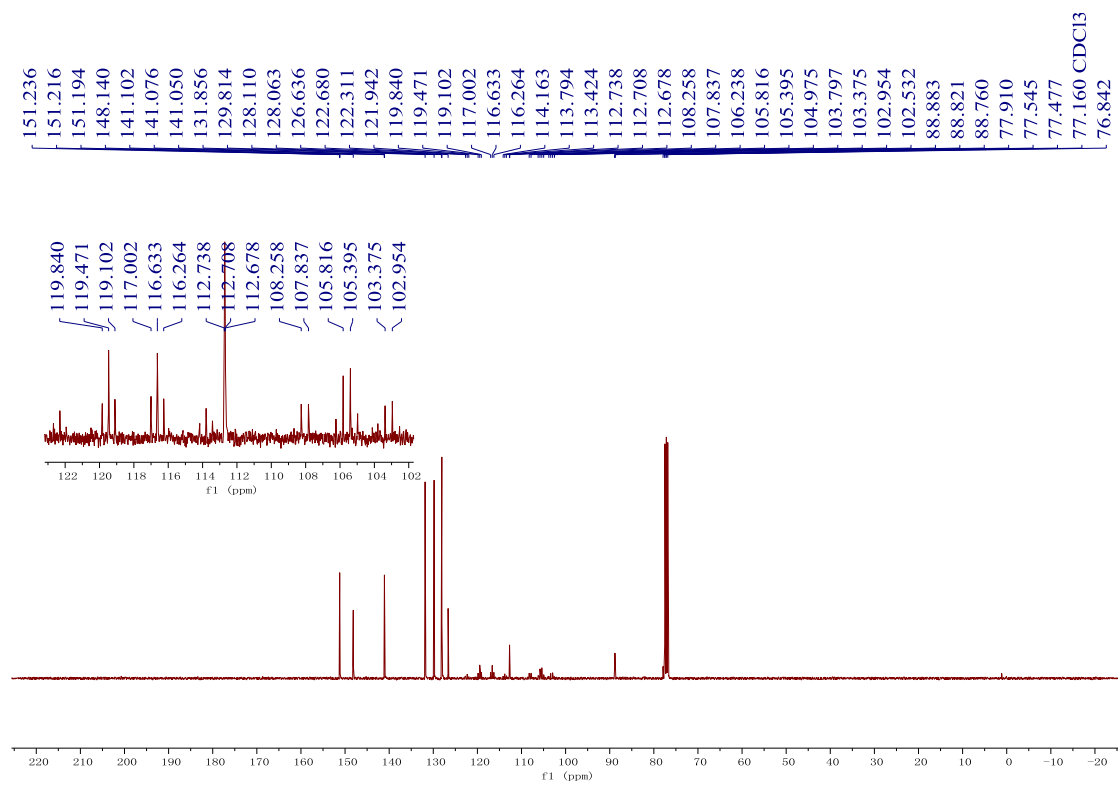

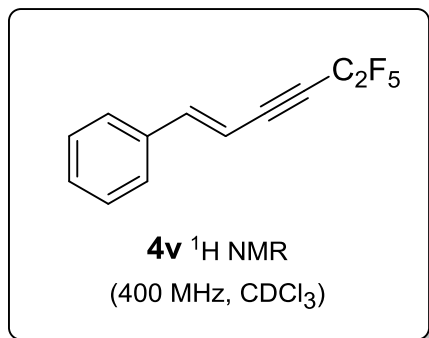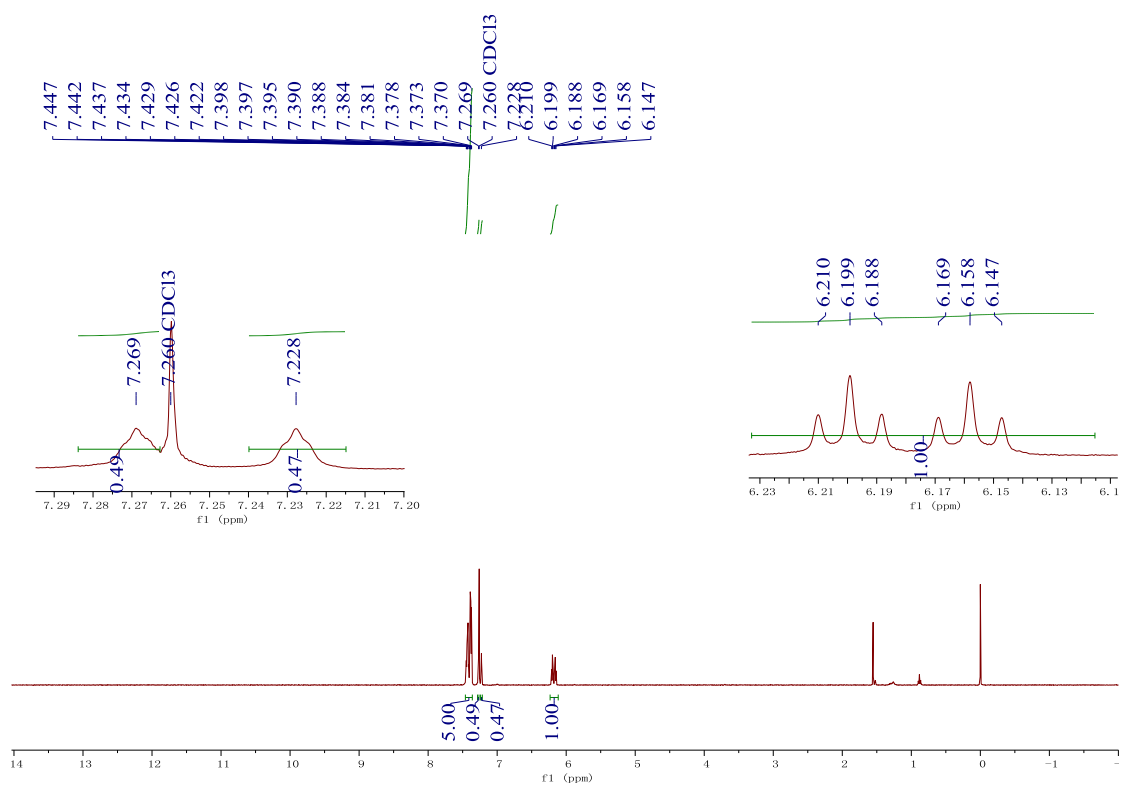

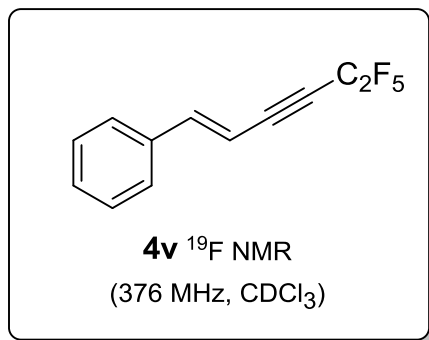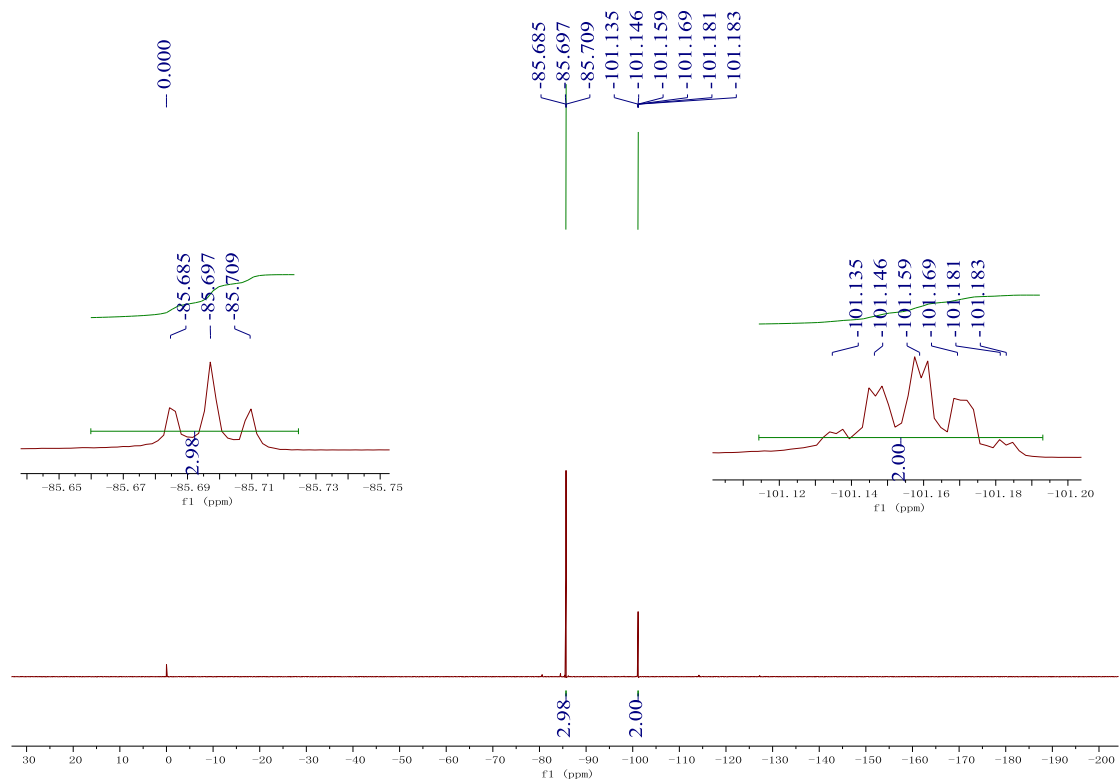

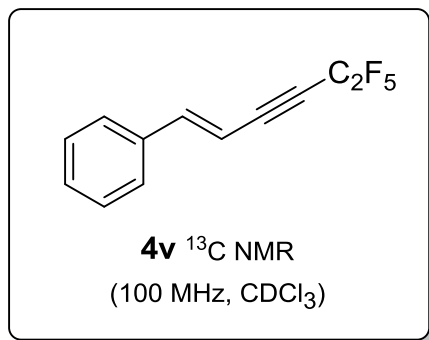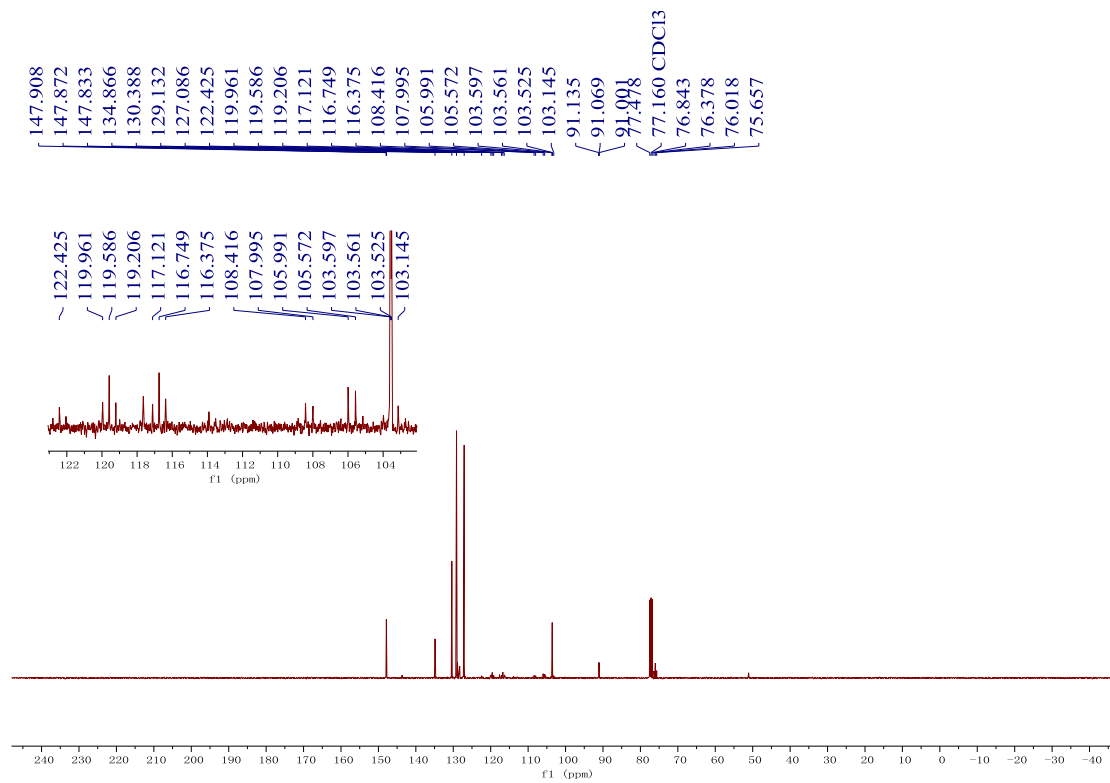

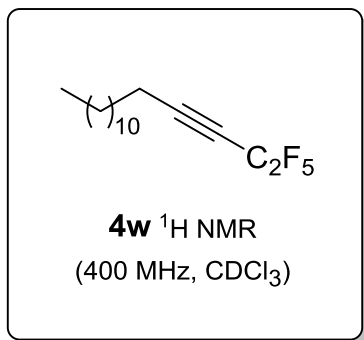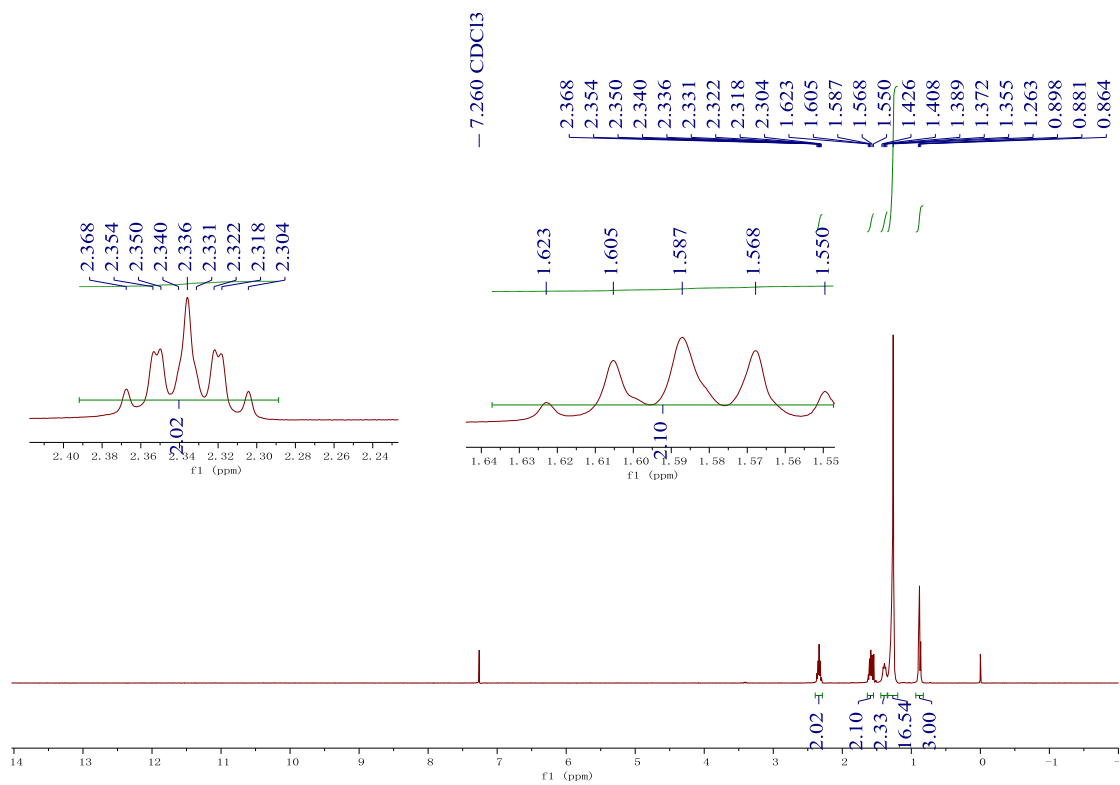



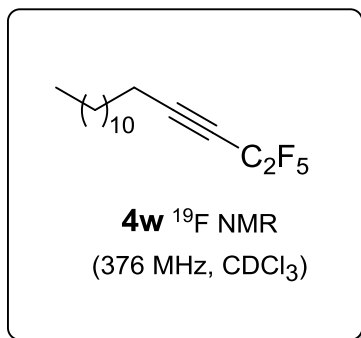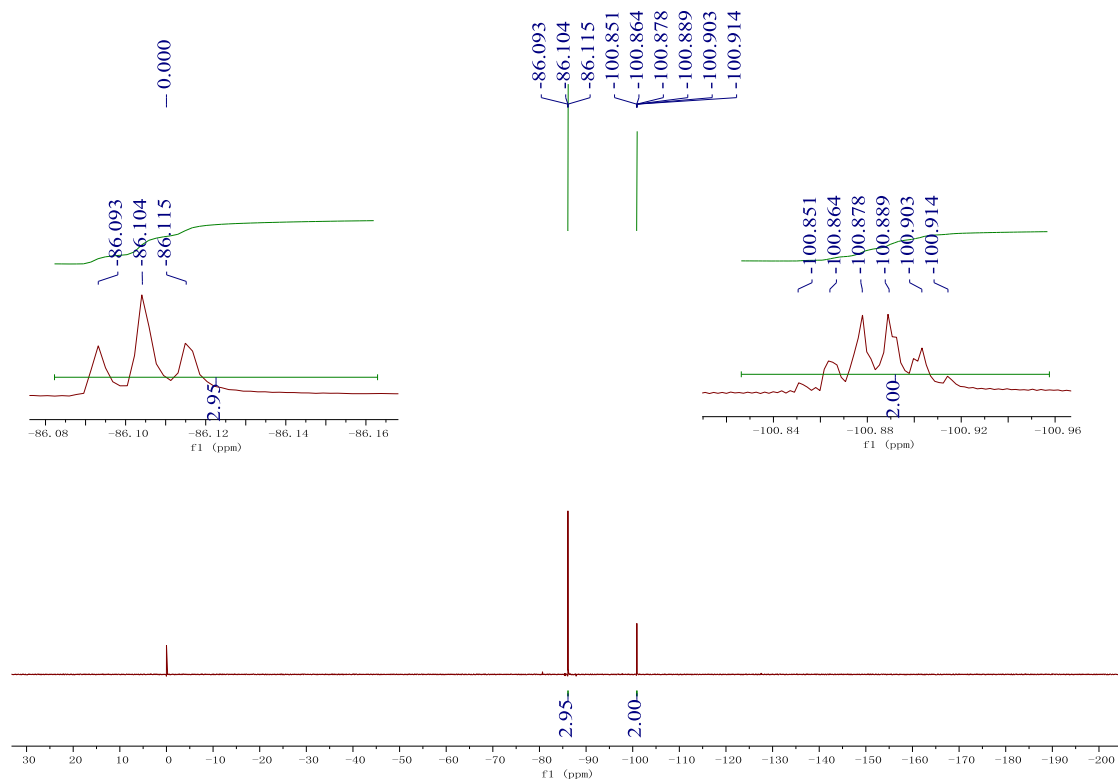

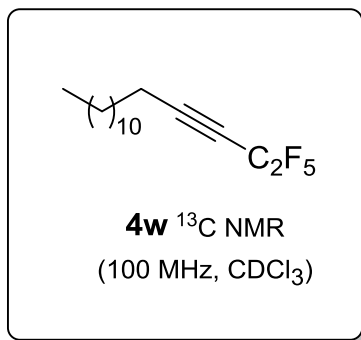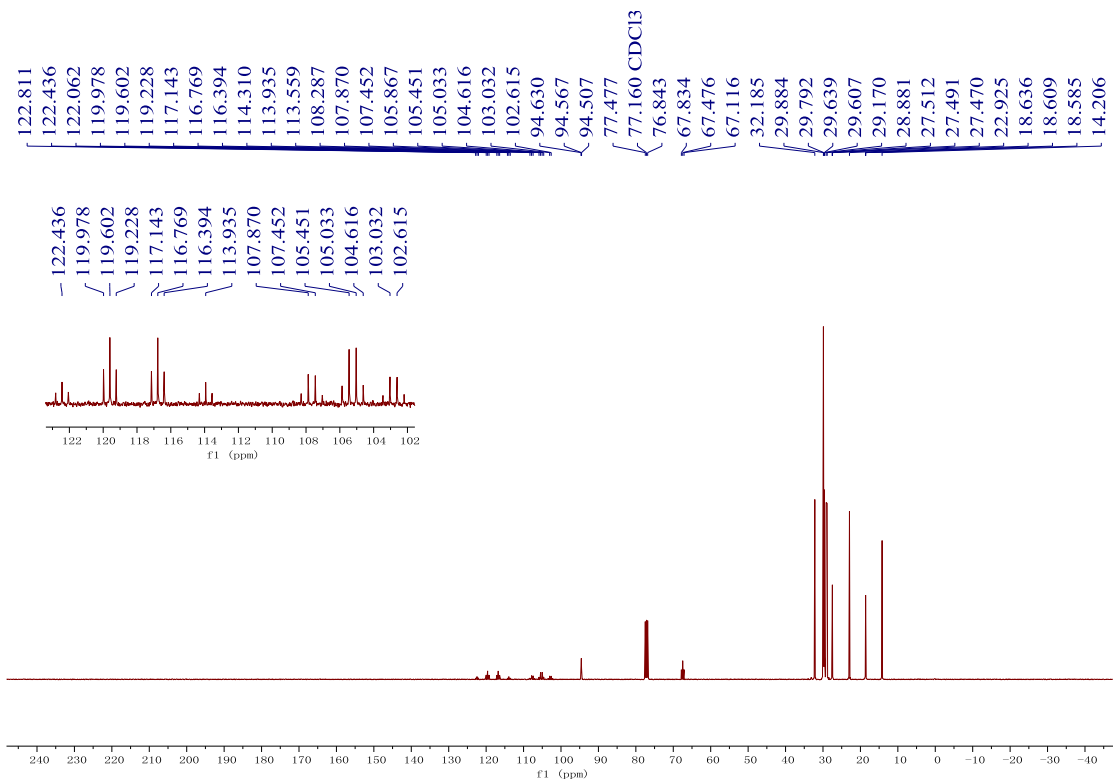

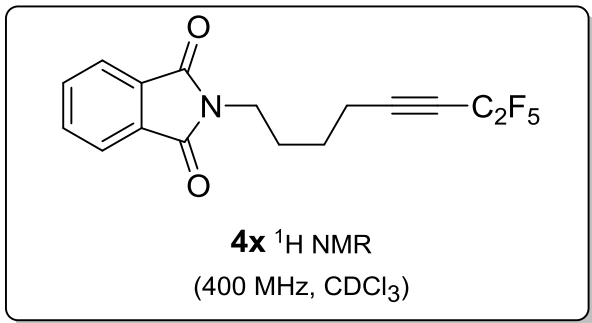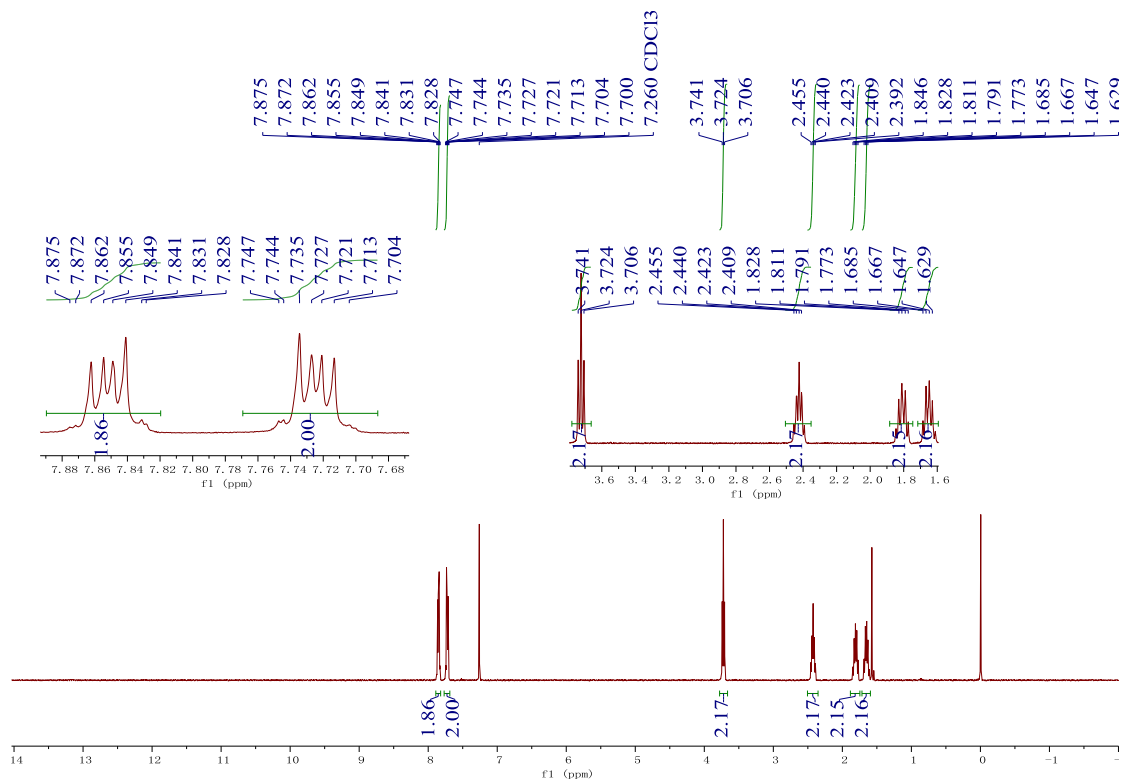



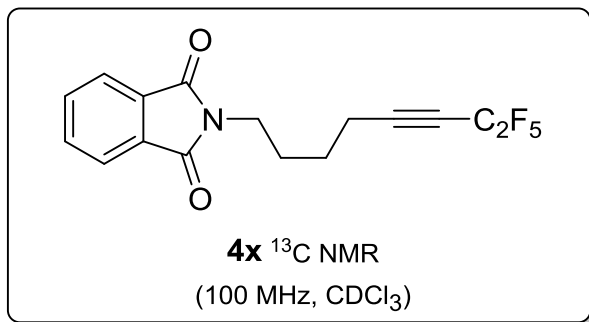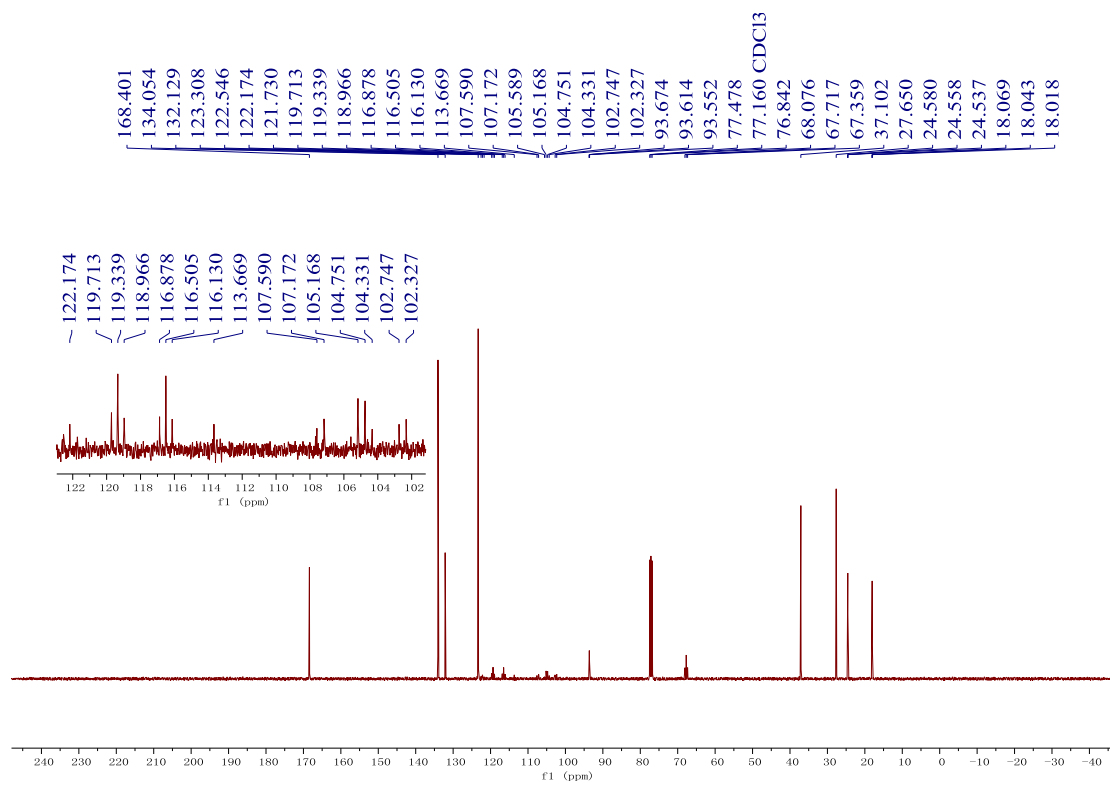

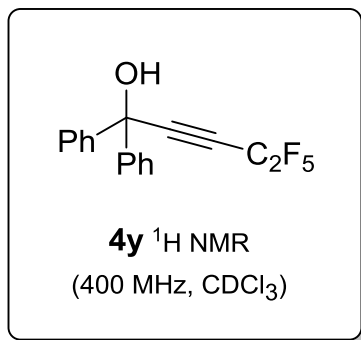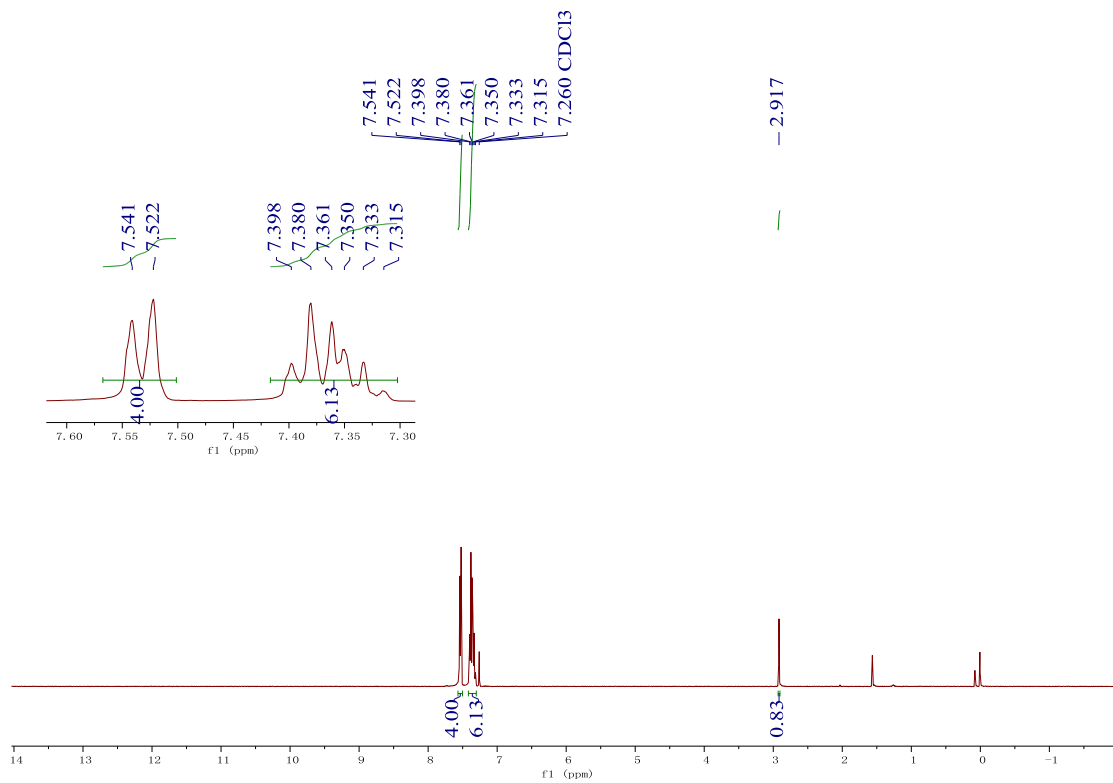

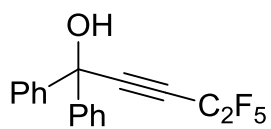

**2y** <sup>19</sup>F NMR  
(376 MHz, CDCl<sub>3</sub>)

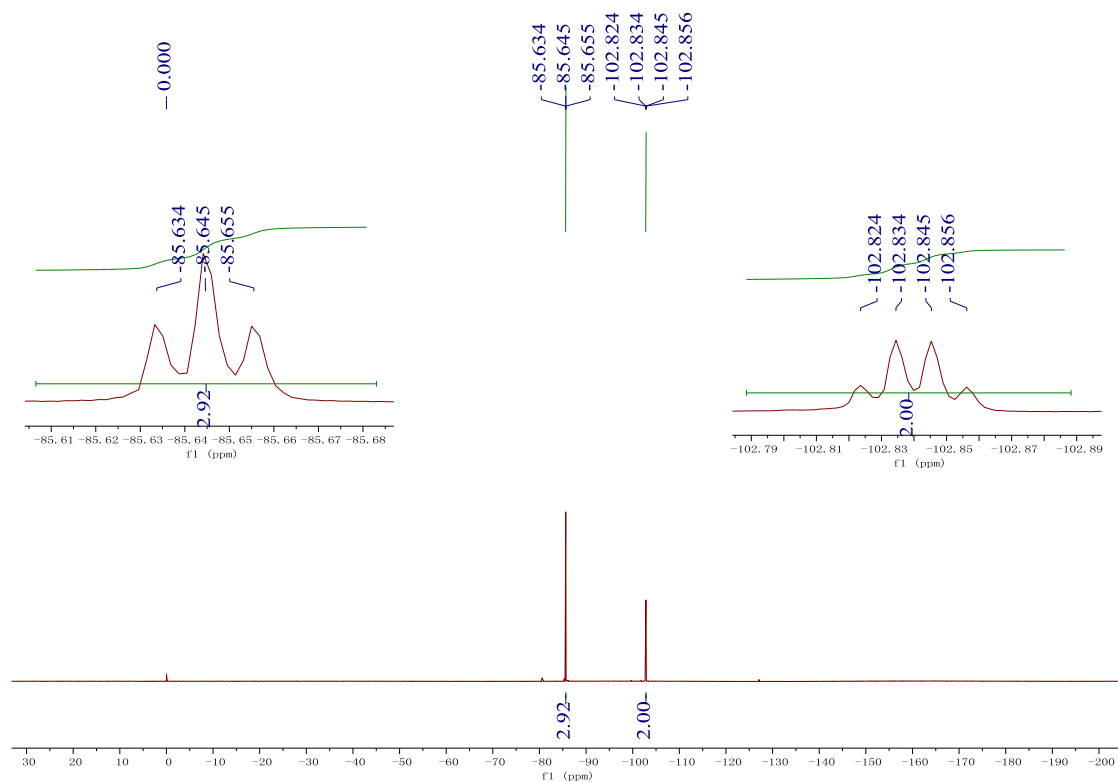

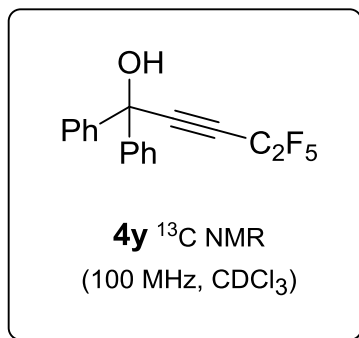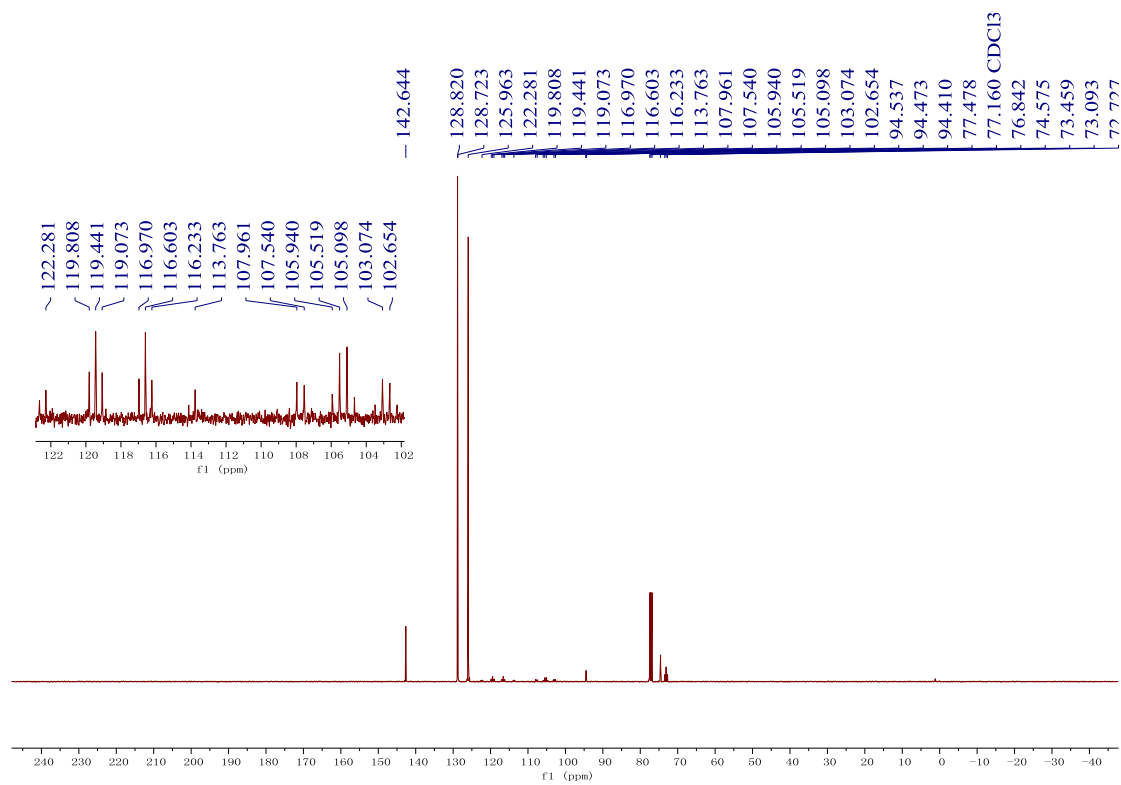



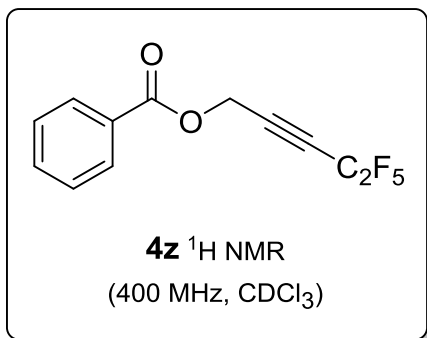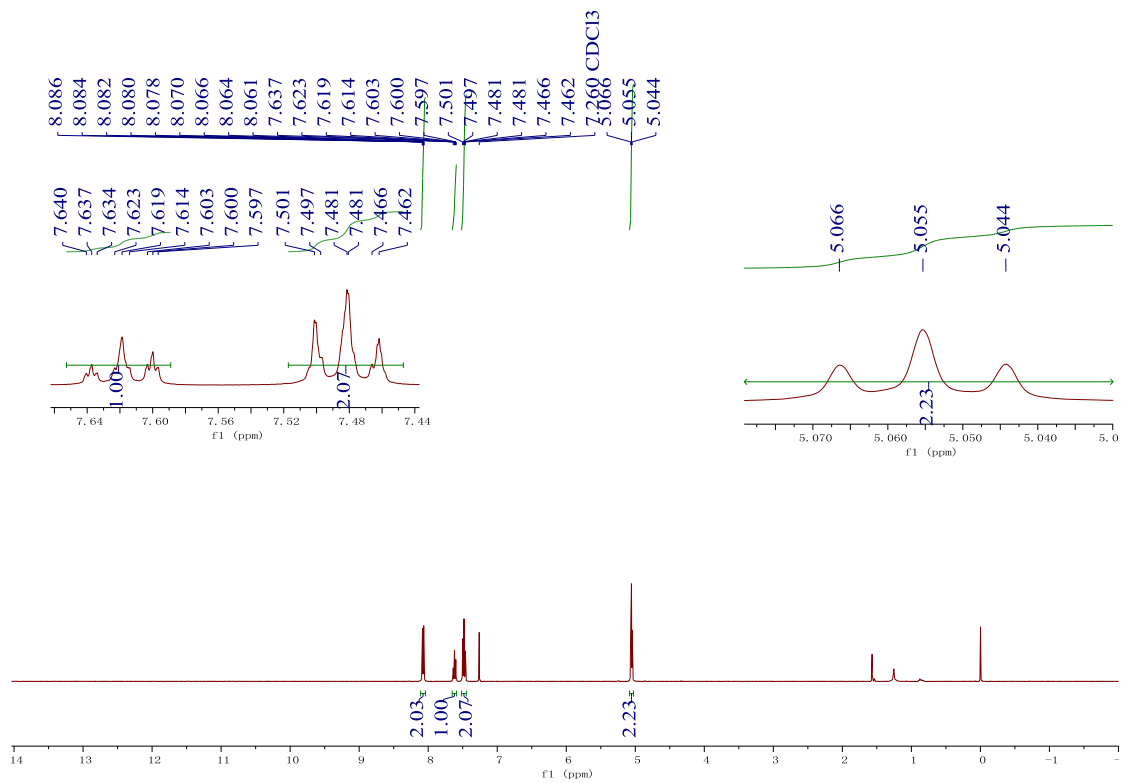

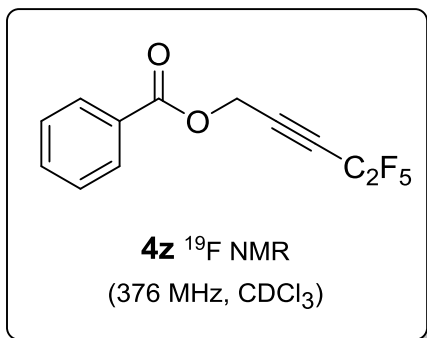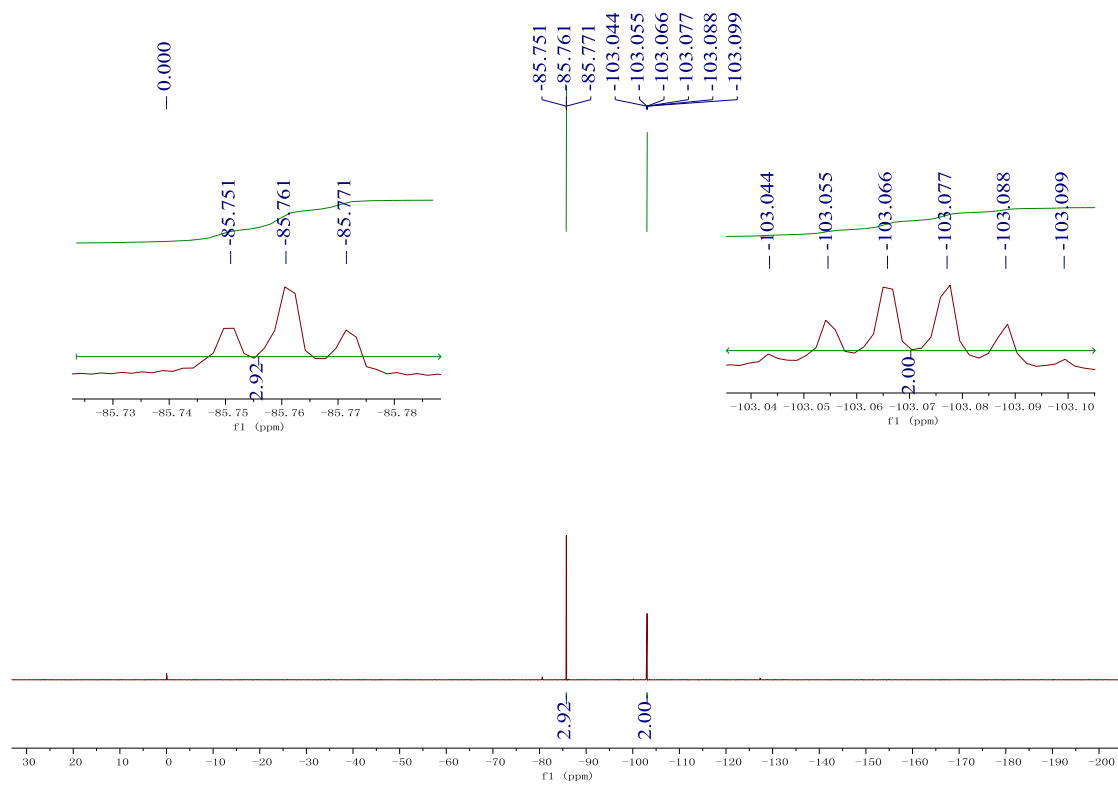

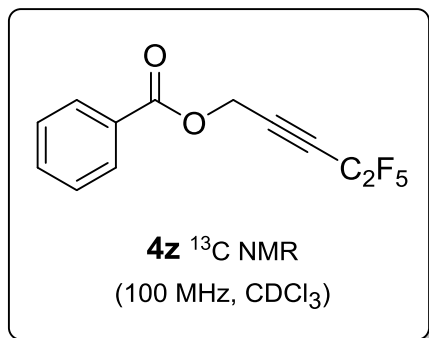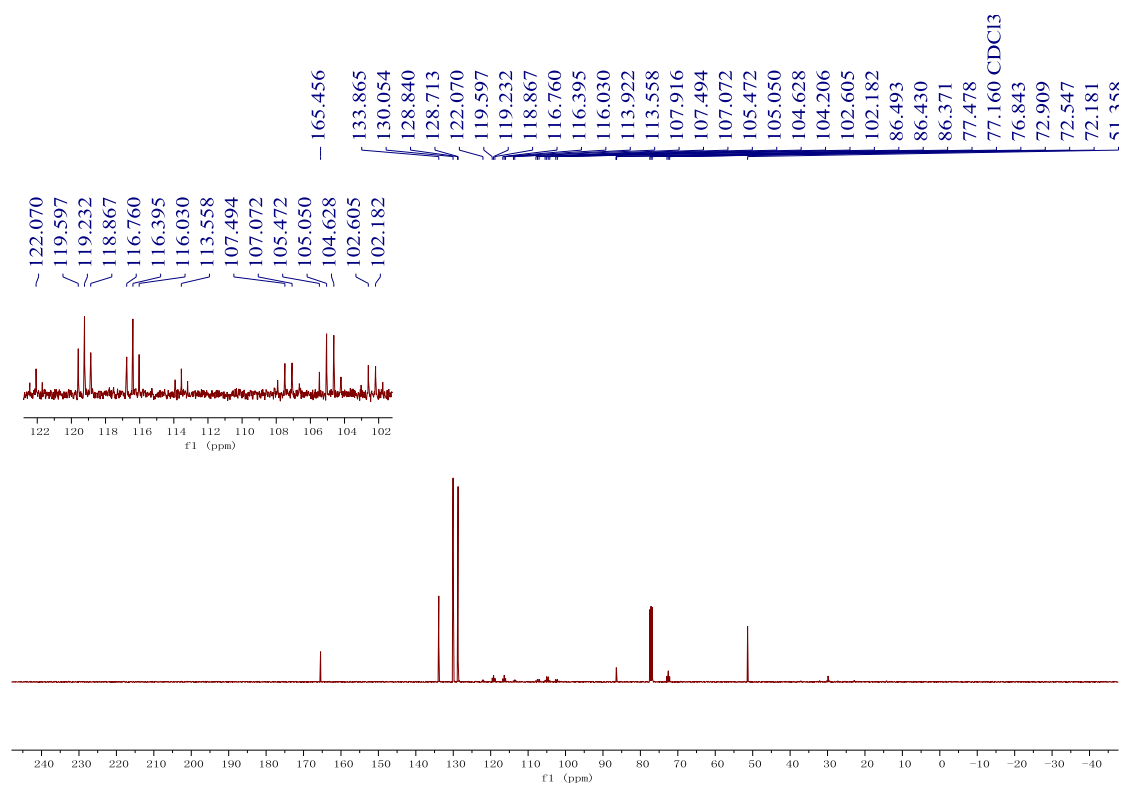

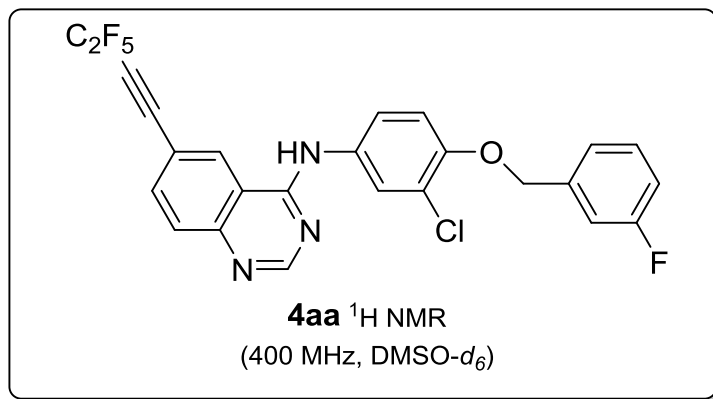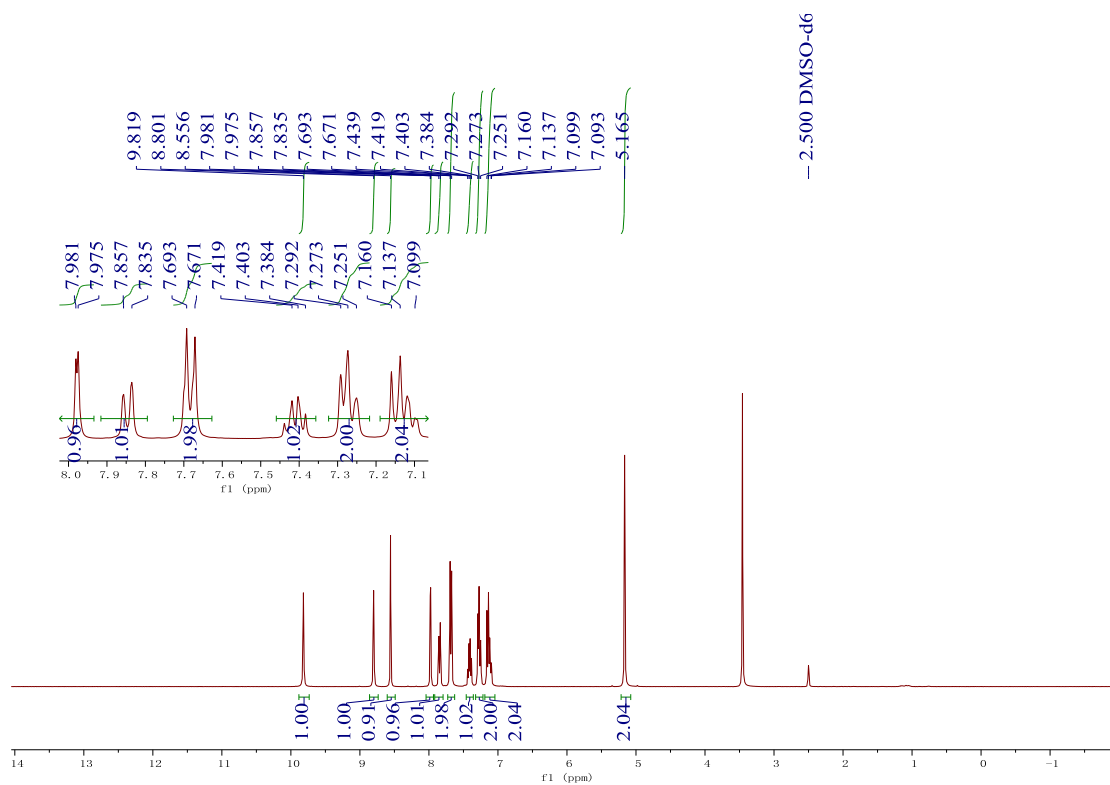

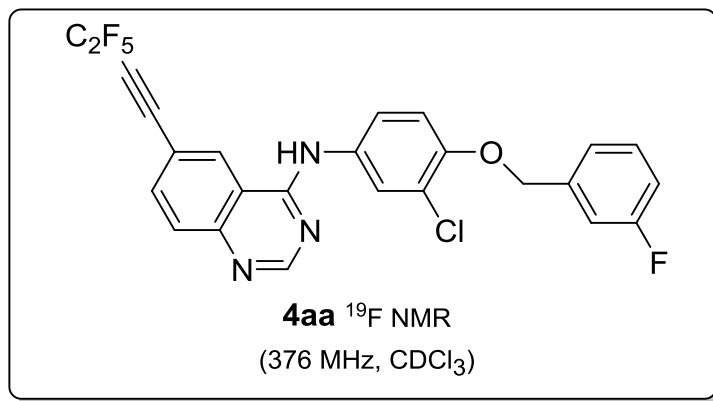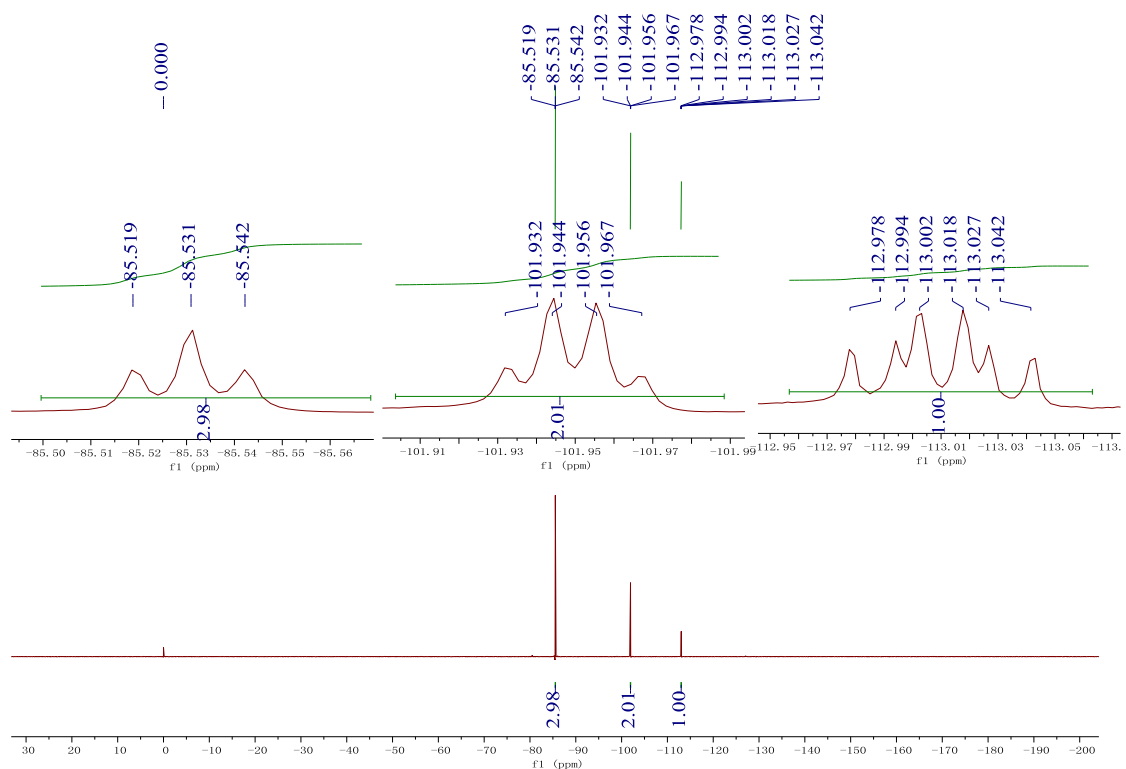

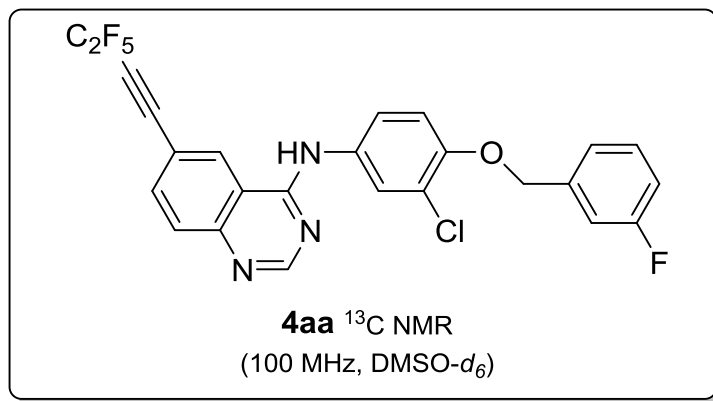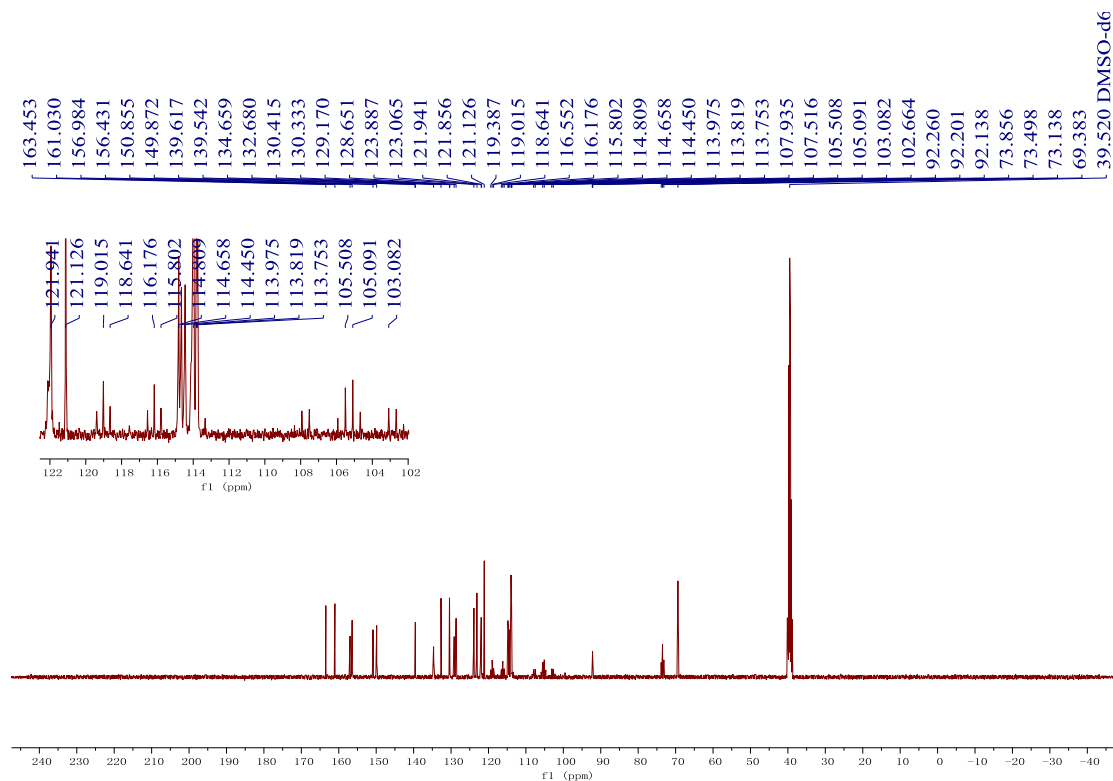

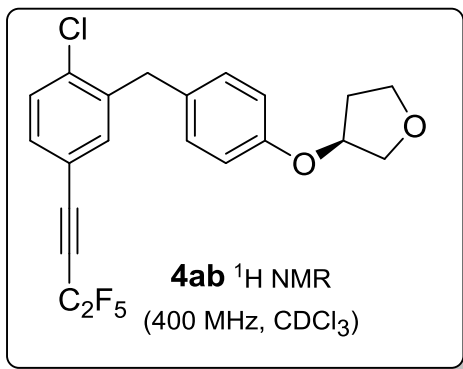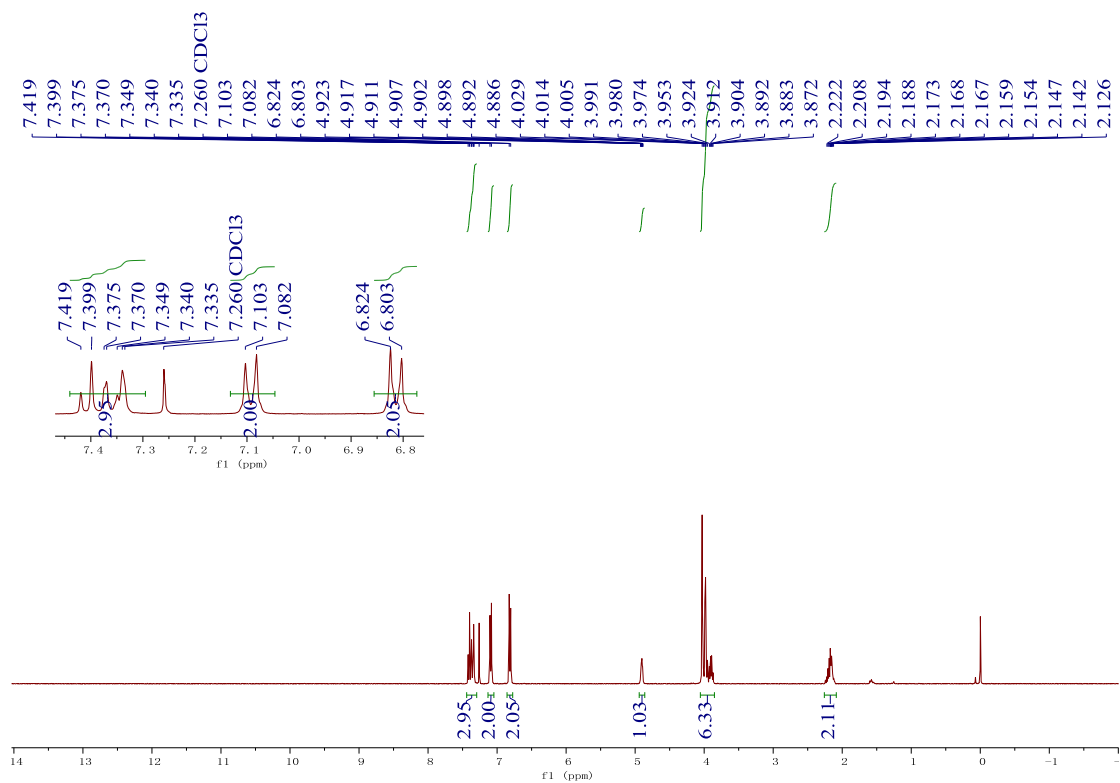

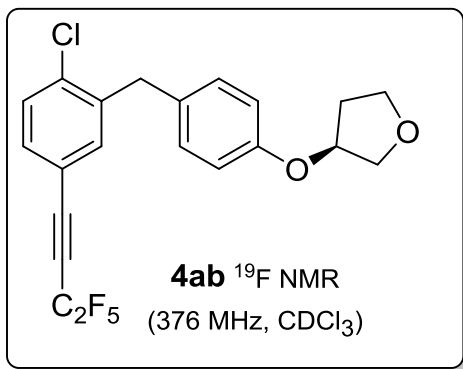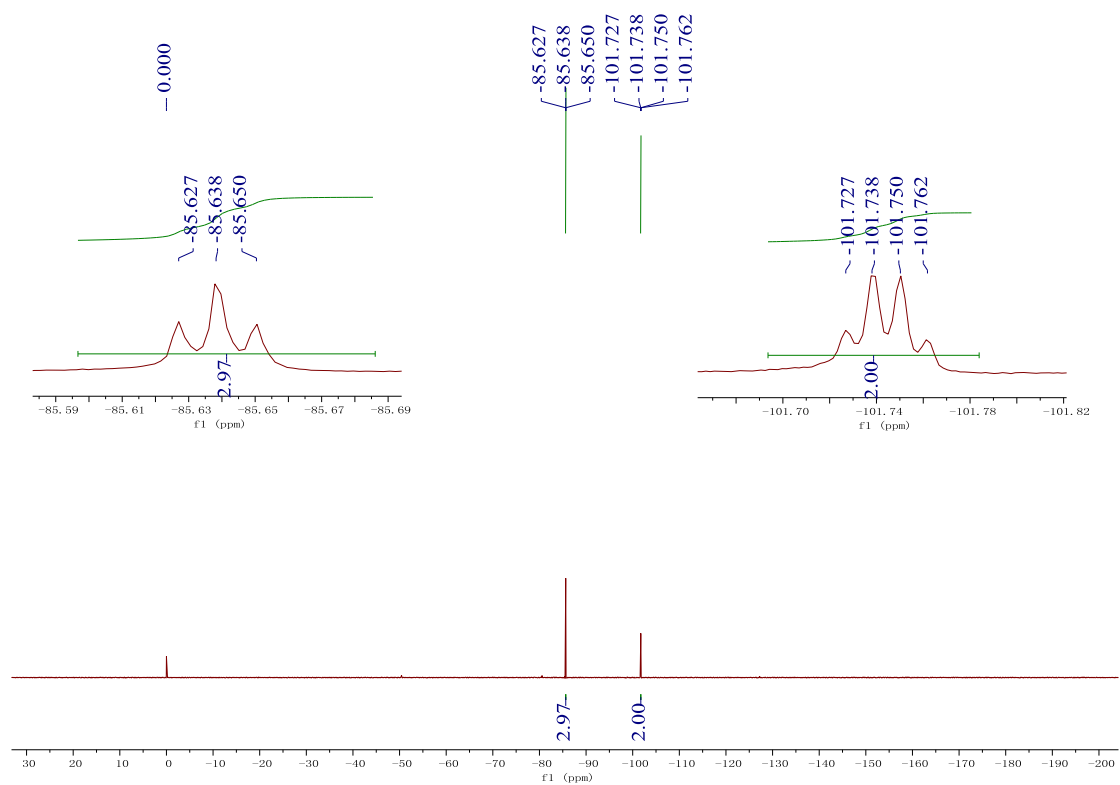



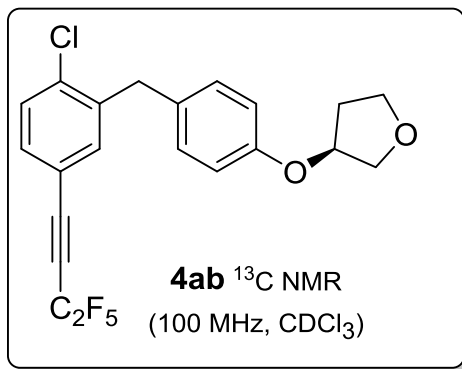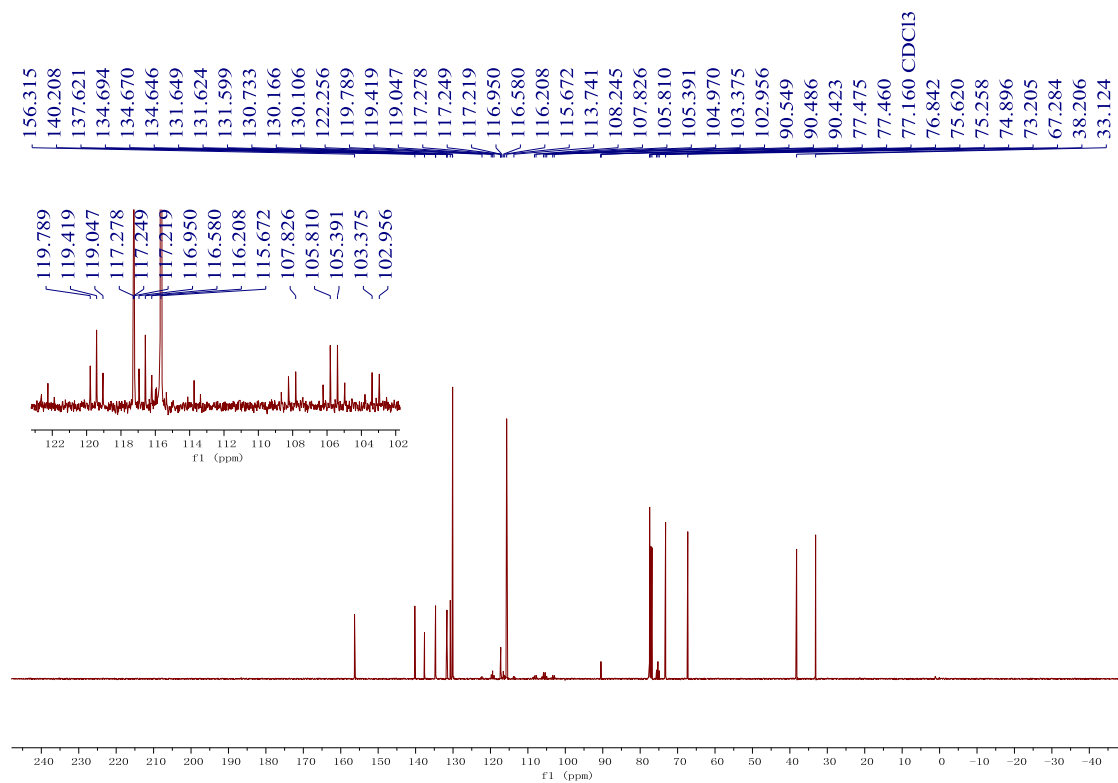

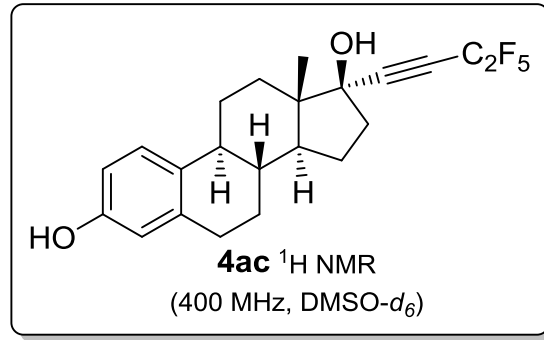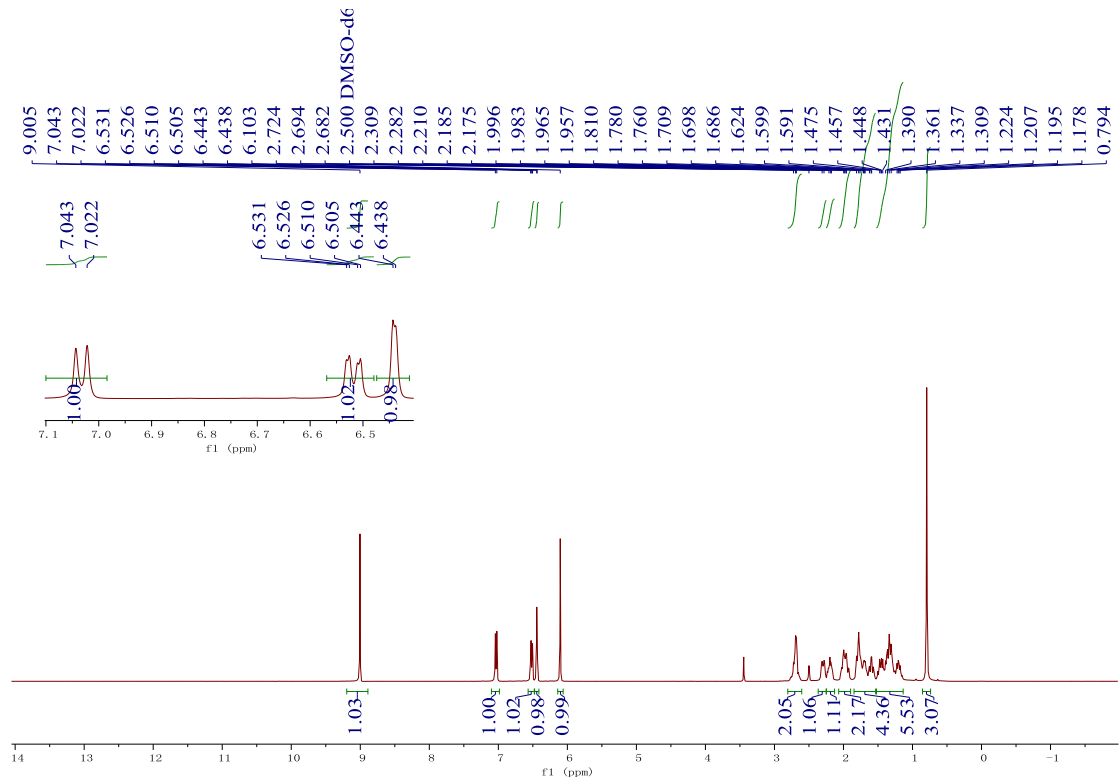

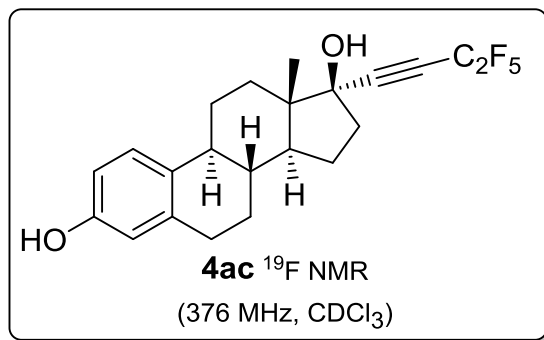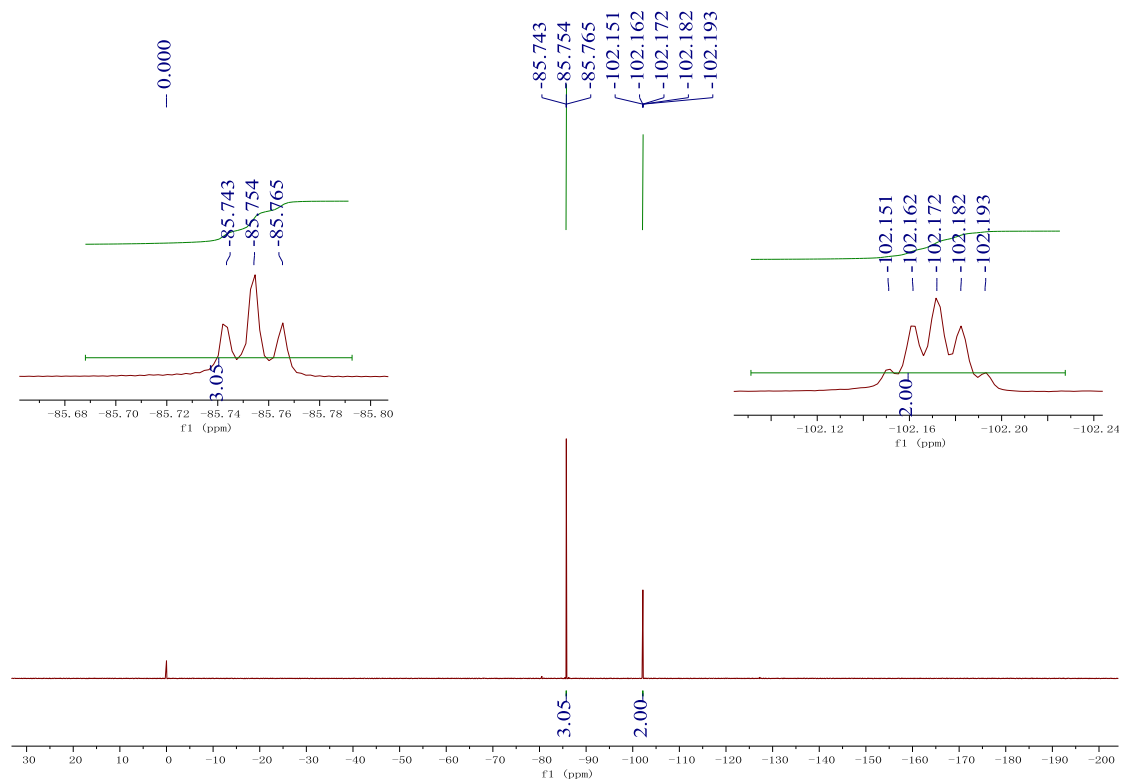

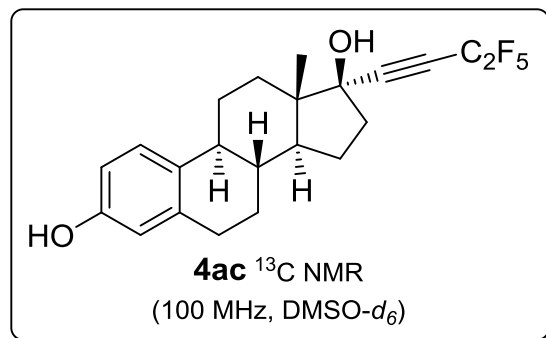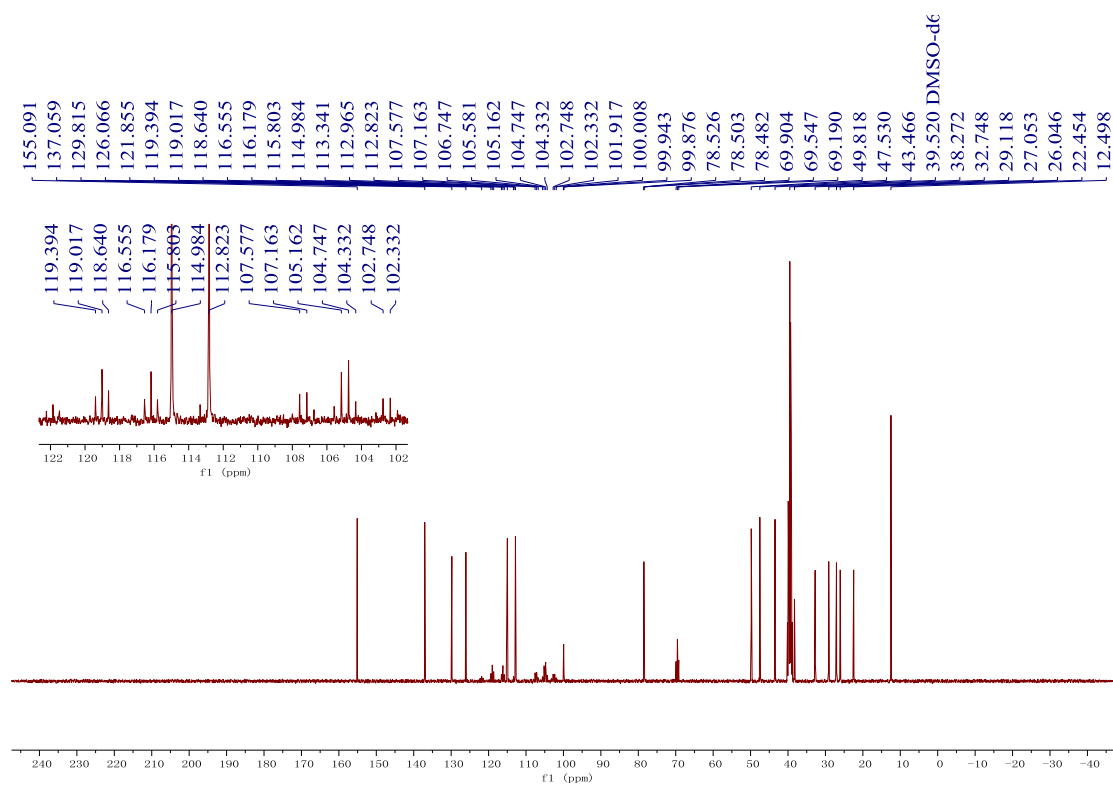

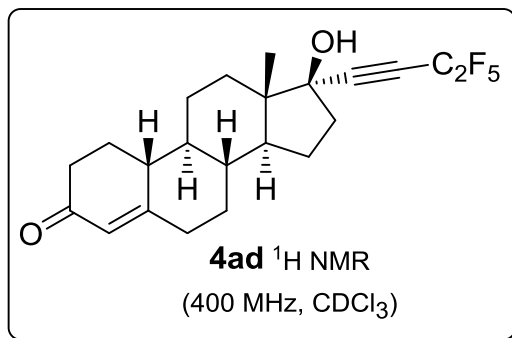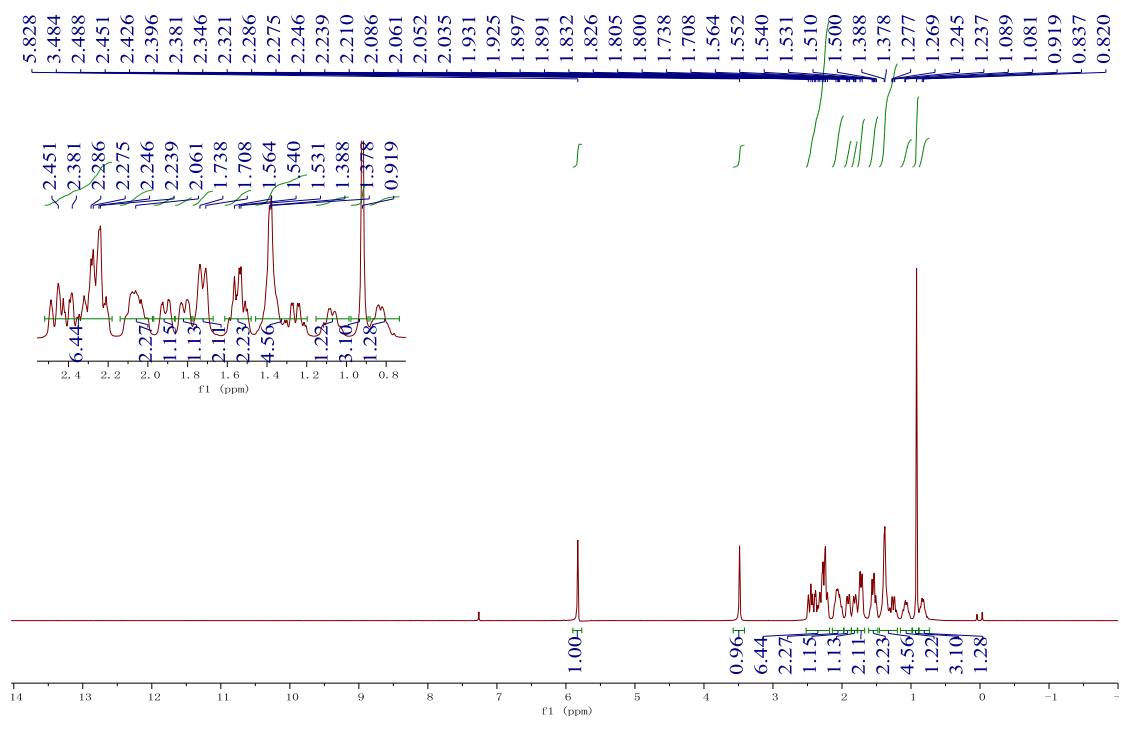

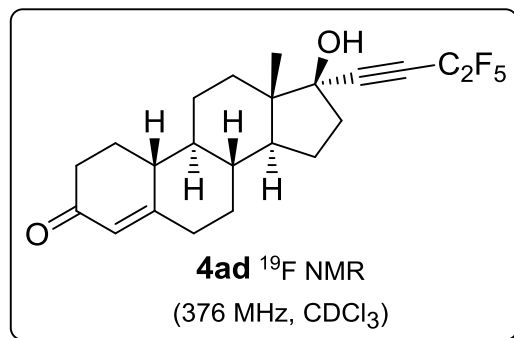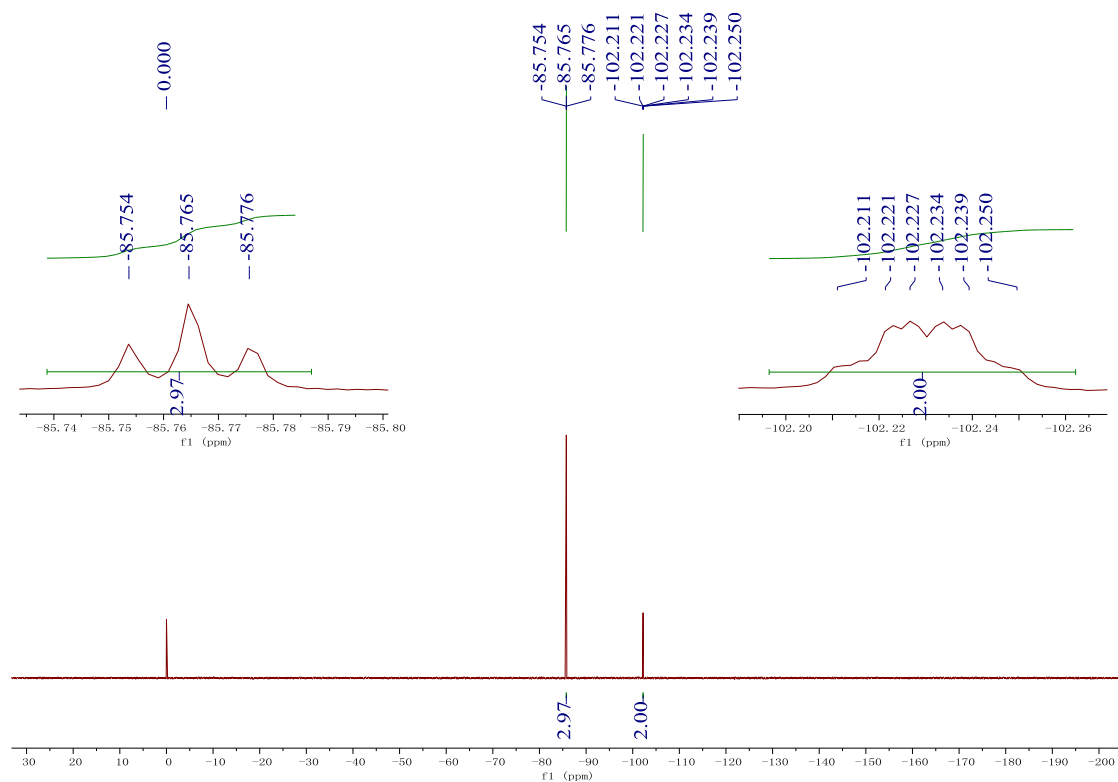

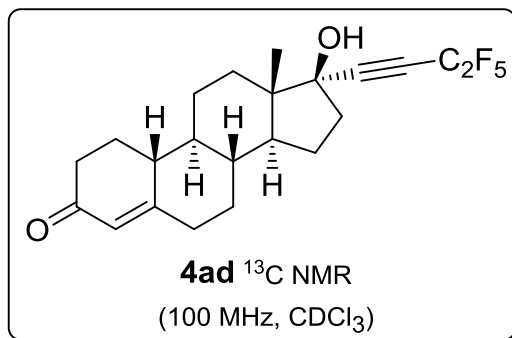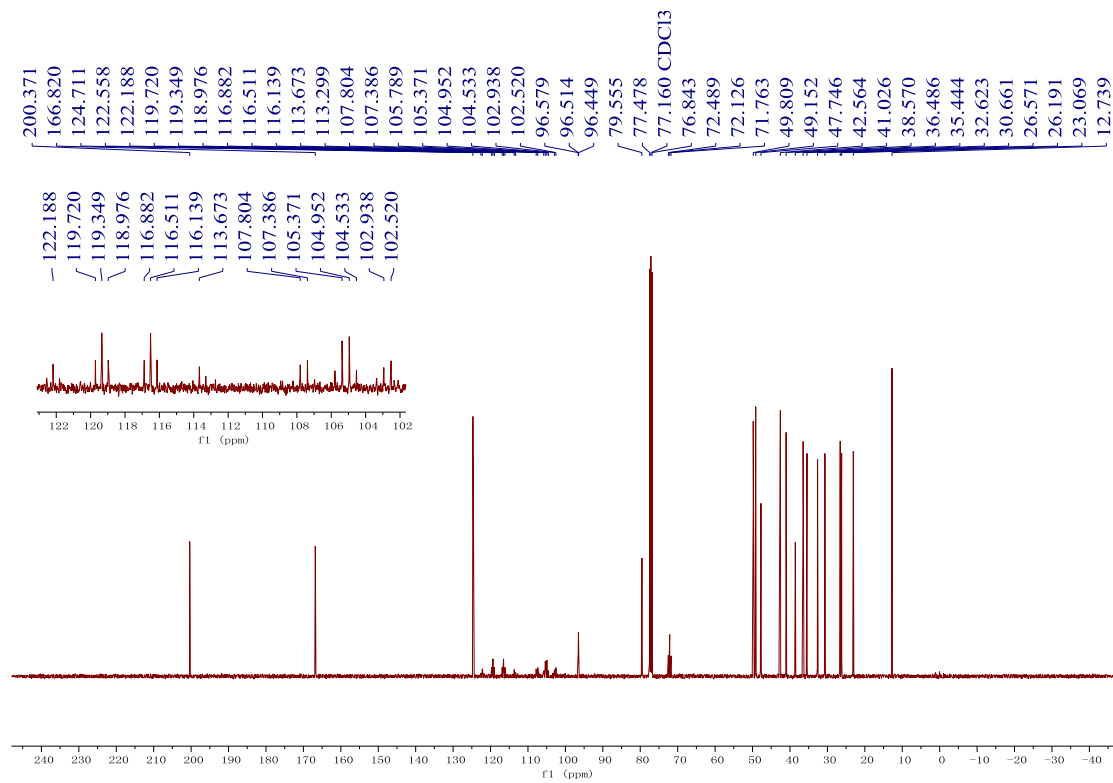

Supplement: d2cc00975g1.pdf [file d2cc00975g1.pdf]
